# Supplementary material for: Discovery and description of novel phage genomes from urban microbiomes sampled by the MetaSUB consortium
Source: PubMed Central journal article supplement (PMC10994904; doi:10.1038/s41598-024-58226-0), 2024-04-04
Supplement: 41598_2024_58226_MOESM1_ESM.pdf [file 41598_2024_58226_MOESM1_ESM.pdf]

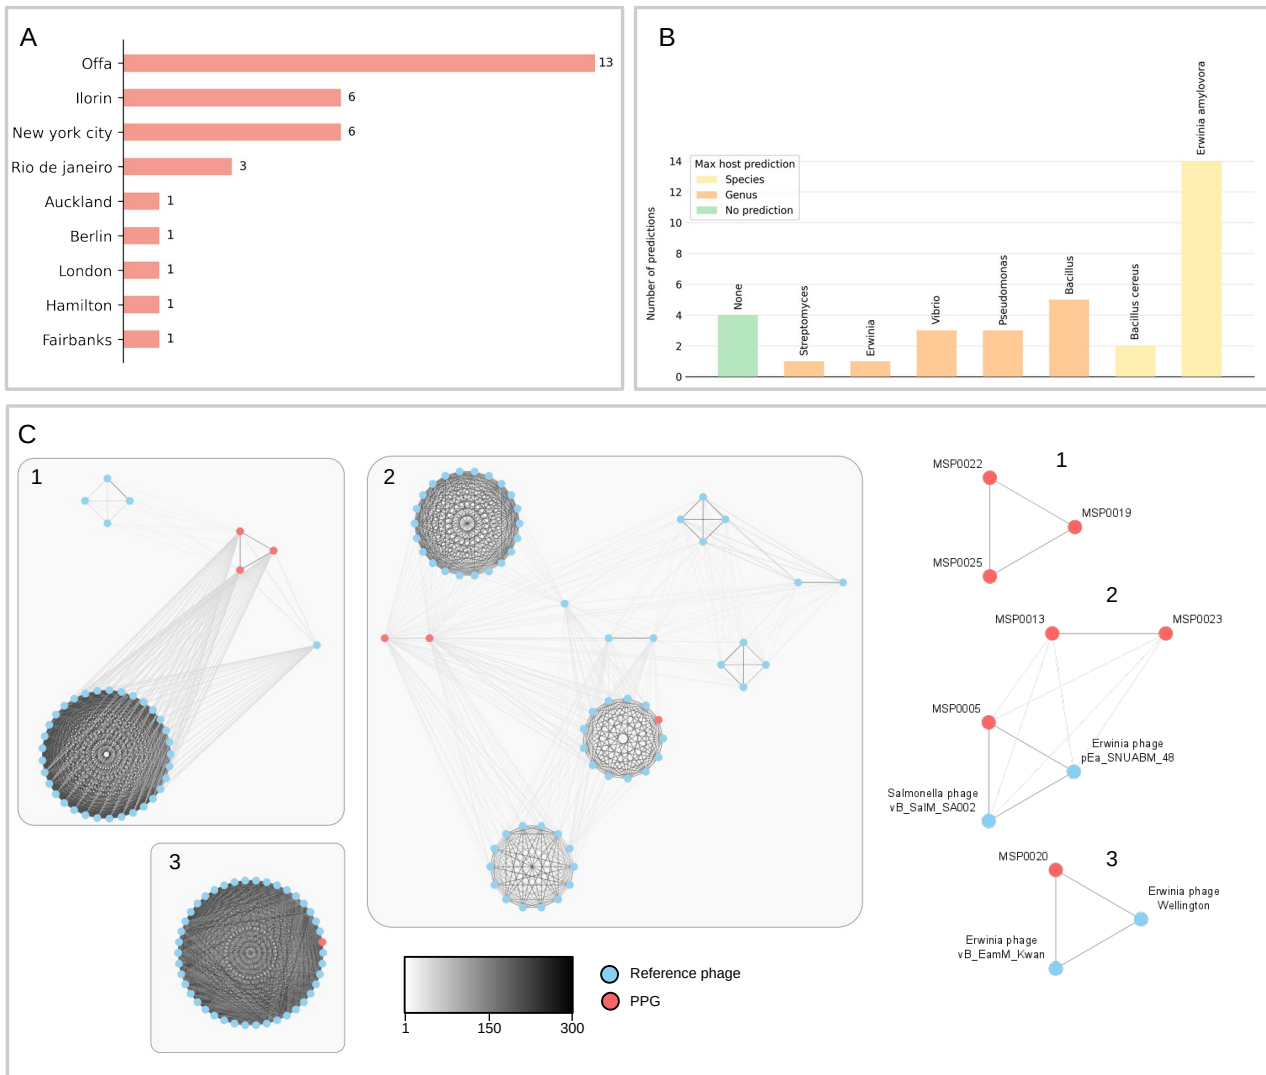

**Supplementary Figure 1. Exploration of huge PPGs recovered from MetaSUB samples.** (A) Distribution of huge PPGs through cities. (B) Distribution of putative hosts predicted by vHULK for the recovered huge PPGs. (C) vContact2 clustering of huge PPGs and NCBI Virus huge bacteriophages. On the left is shown a representation of all clusters. On the right are shown the parts of the clusters that include the huge PPGs.

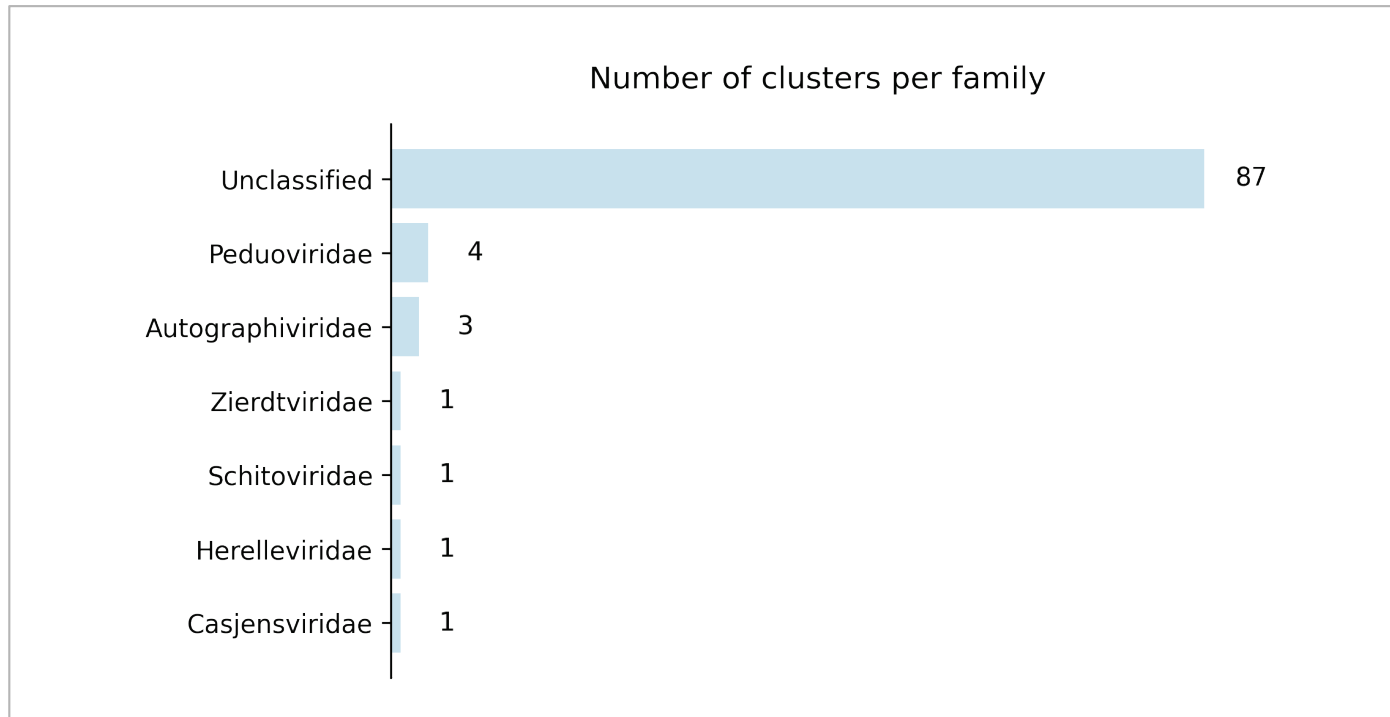

**Supplementary Figure S2. Number of clusters per family.** Number of clusters assigned with a family level classification. Most reference phages have no family level classification.

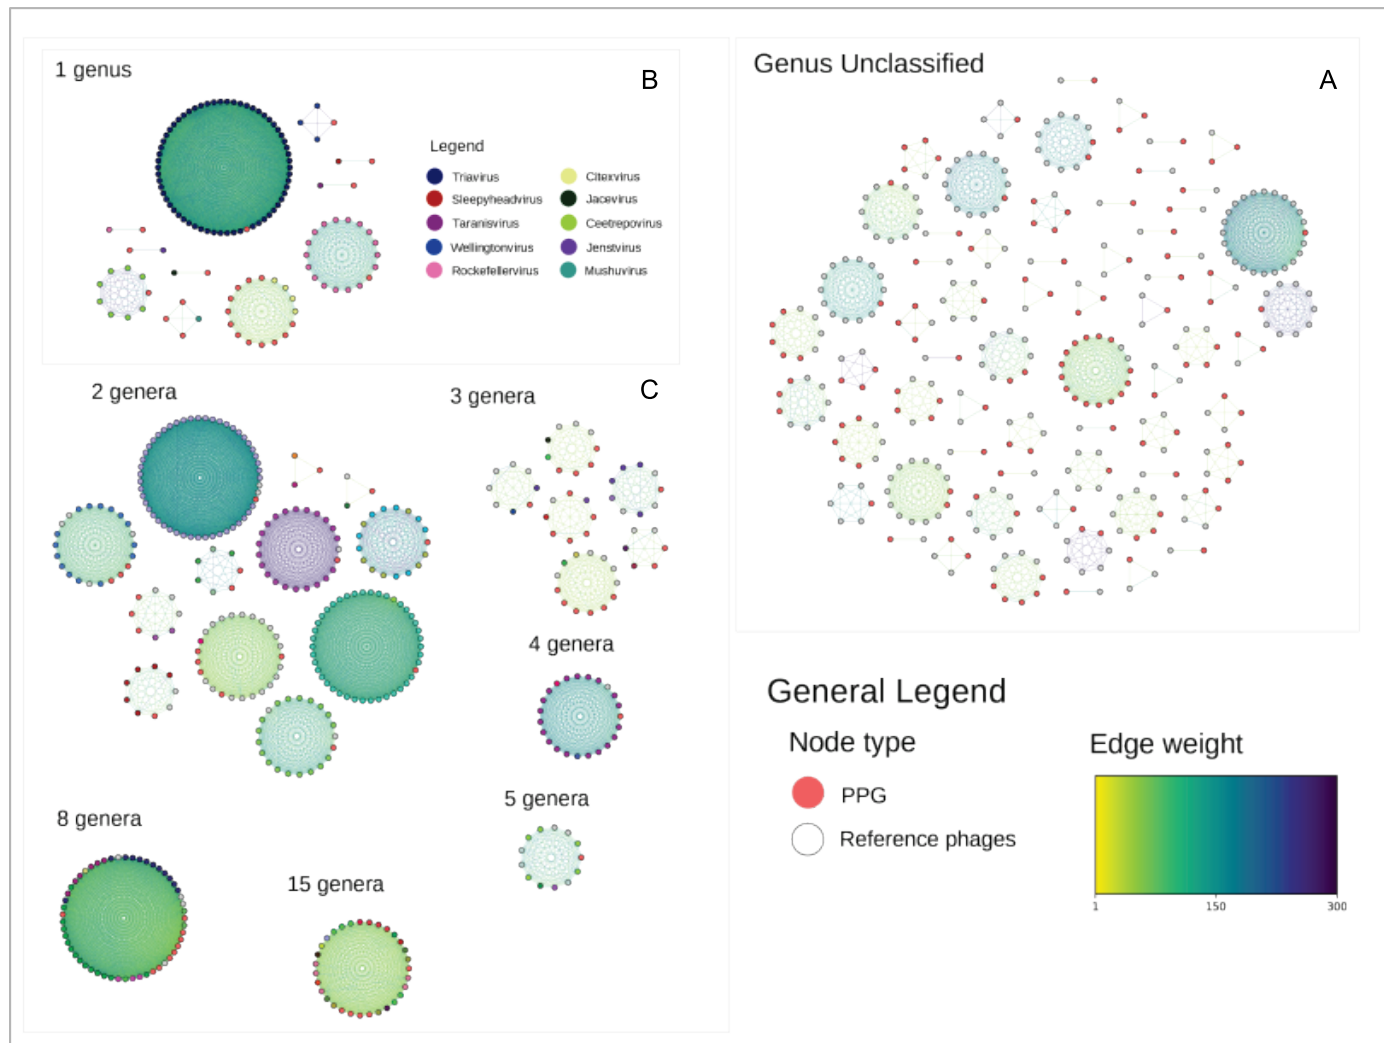

**Supplementary Figure S3. PPGs clustered with vContact2 reference phages.** A total of 207 recovered genomes were clustered in 98 clusters with vContact2 reference phages from Millard database (Jan. 2023). Each node is a phage genome, in which red nodes are PPGs and the colored nodes are the reference phages. A color gradient shows edge intensity between nodes. (A) Clusters with reference phages with unclassified genus. (B) Clusters with reference phages of the same genus. (C) Clusters with reference phages from different genera.

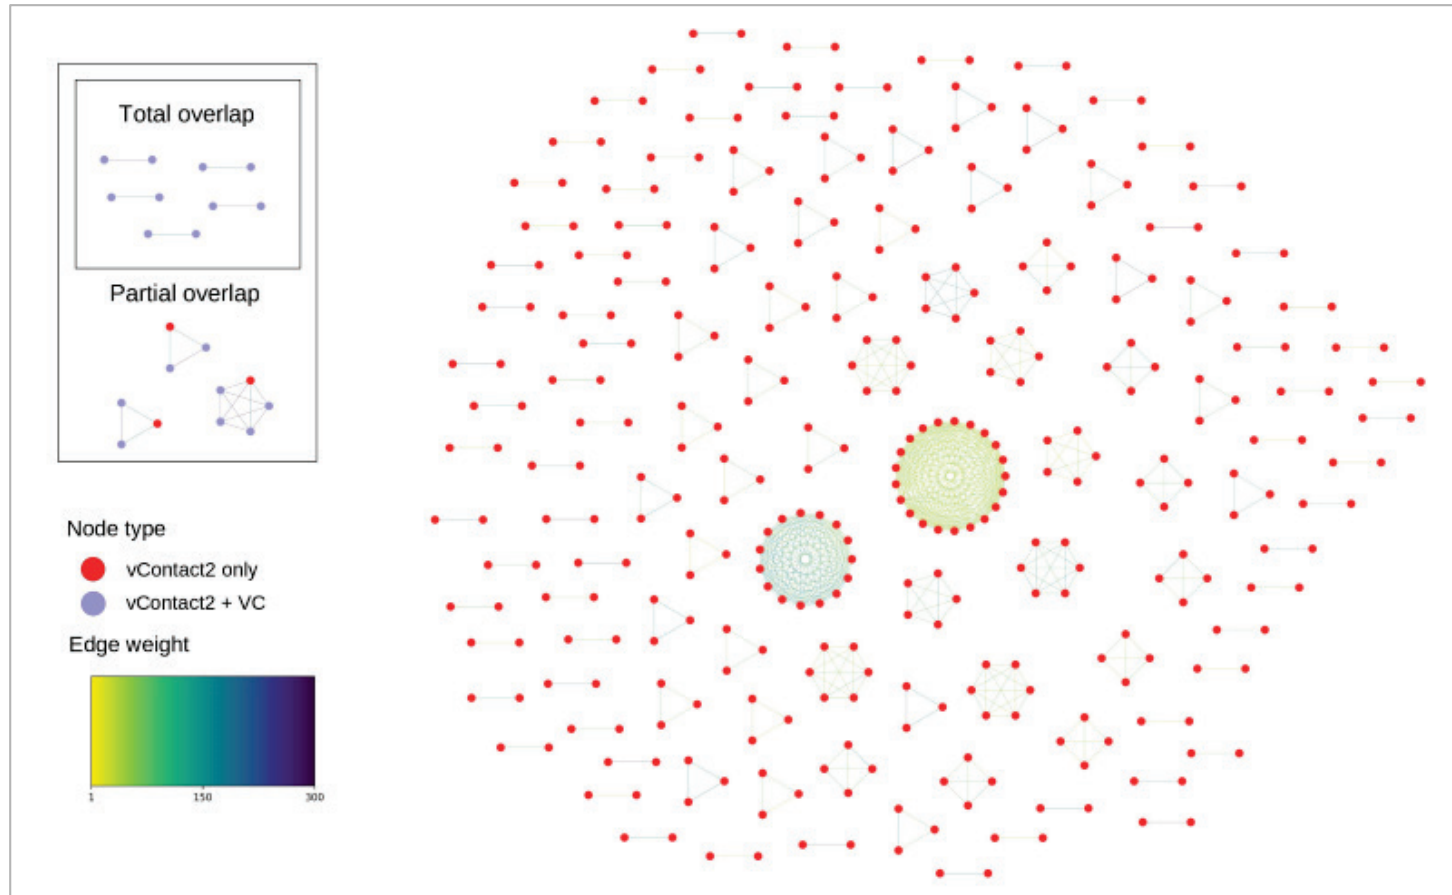

**Supplementary Figure S4. Clusters with total, partial or none overlap between vContact2 and VC methodology.** All recovered PPGs were clustered using vContact2 and VC methodology. The clusters with complete or partial overlap between vContact2 and VC methodology were presented in the left panel. When a cluster shares a partial overlap between the approaches, the nodes in this partial overlap portion span a high vContact2 edge weight.

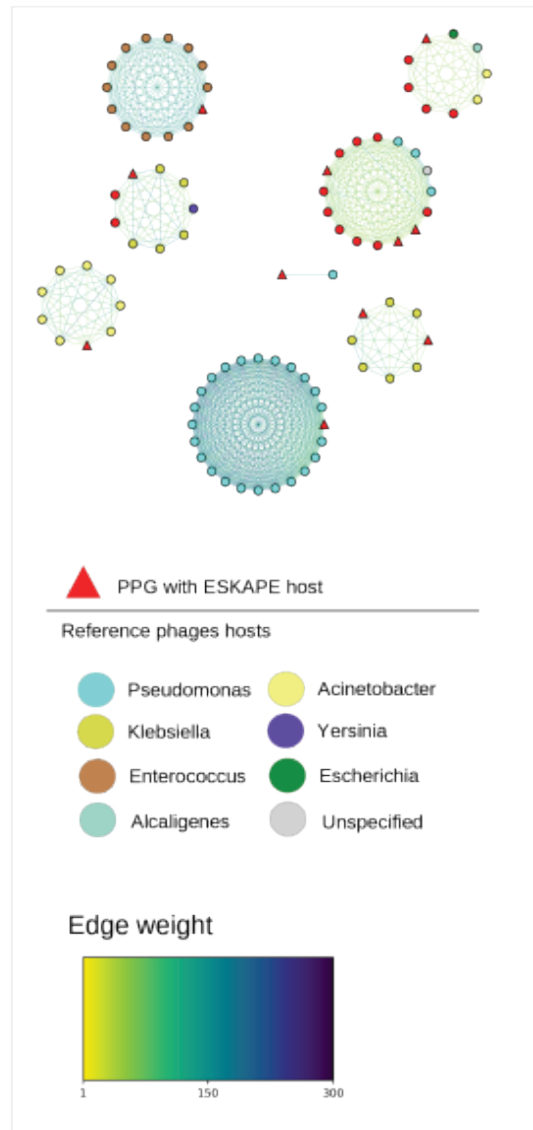

**Supplementary Figure S5. Clusters with the 11 PPGs assigned hosts from ESKAPE group.** All recovered PPGs were clustered using vContact2 then filtered for clusters whose hosts assigned for reference phages are in the ESKAPE group.

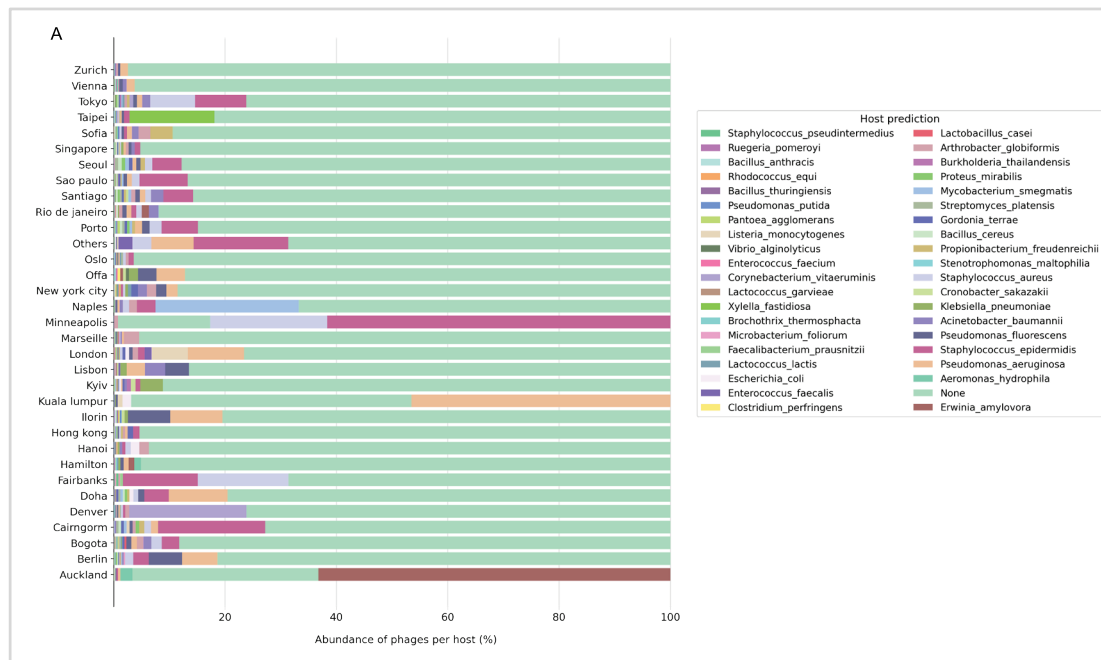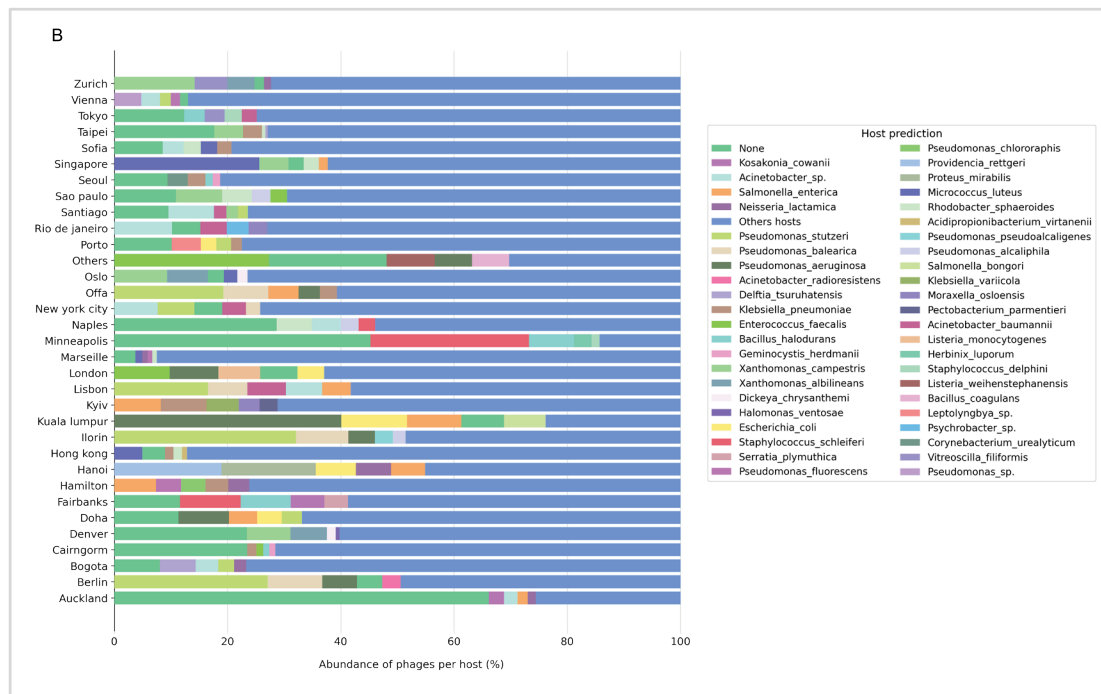

**Supplementary Figure S6. Abundance of PPGs per host. (A) Abundance of PPGs per host species predicted by vHULK. (B) Abundance of PPGs per host species predicted by CRISPR-Cas alignments**

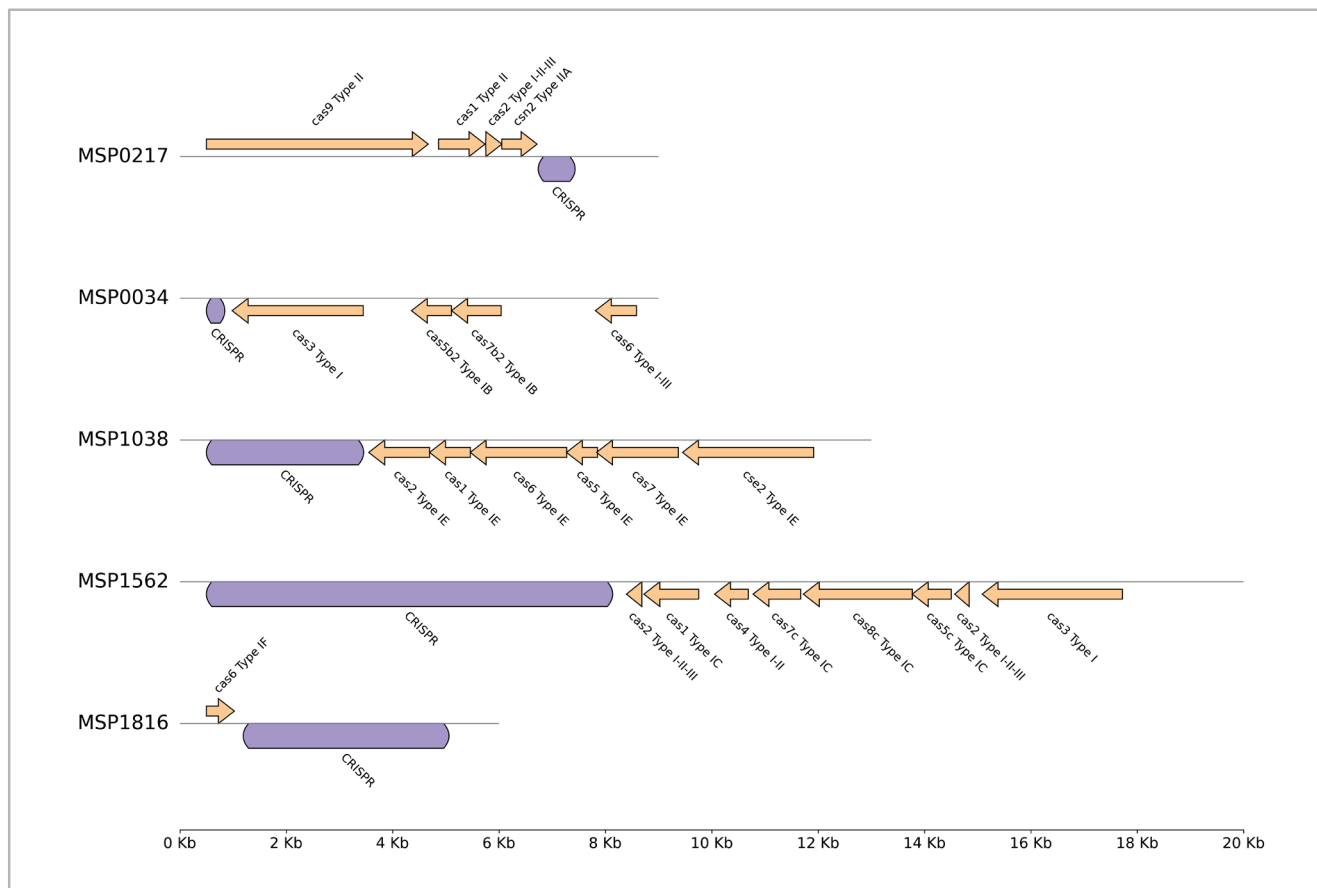

**Supplementary Figure S7. CRISPR-Cas system found in PPGs.** CRISPR-Cas spacers are represented with a rounded box colored in purple. Each arrow indicates a Cas gene.

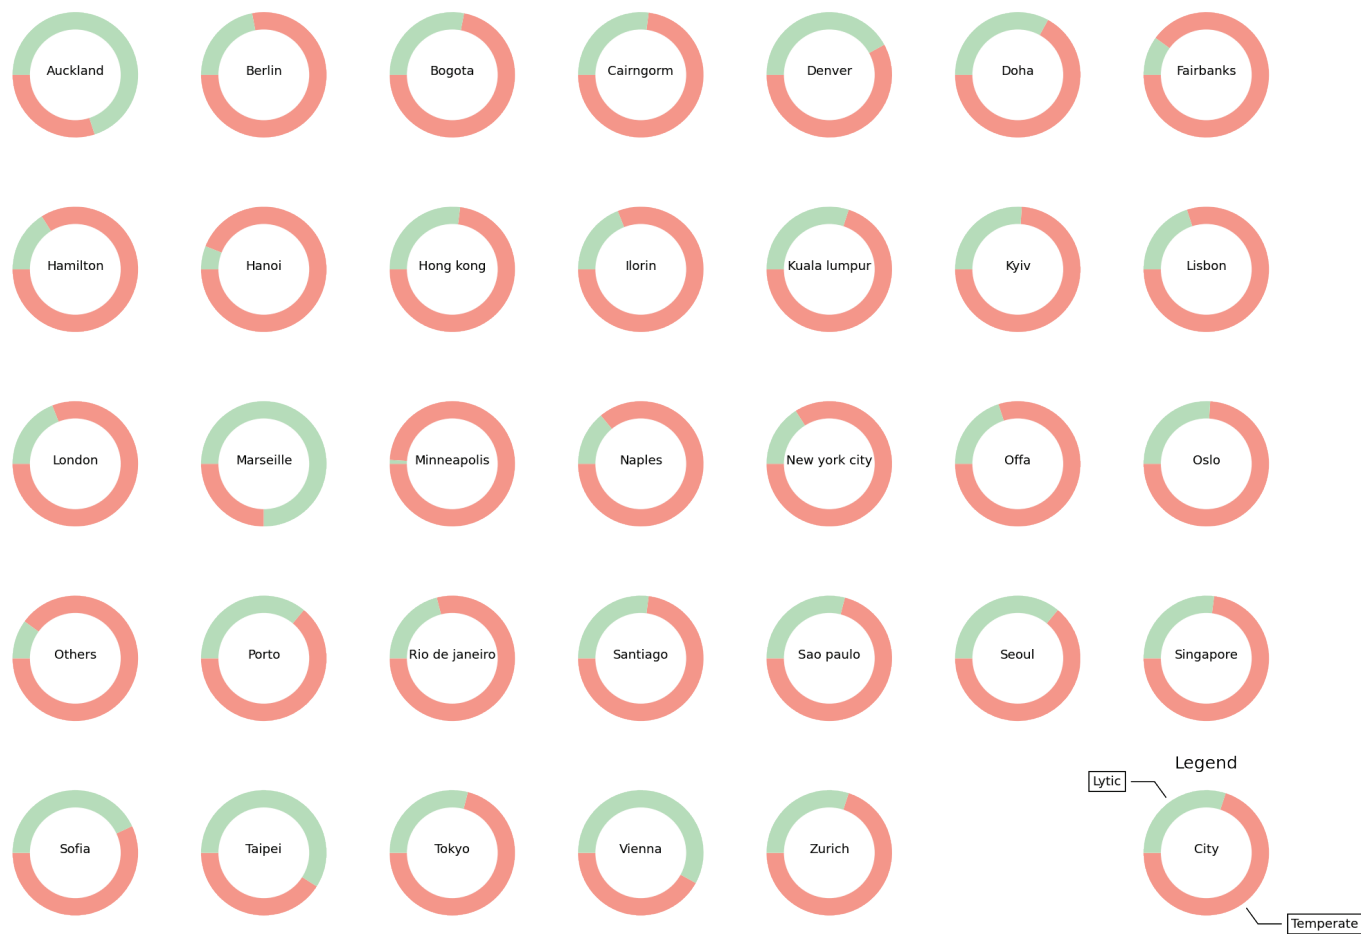

**Supplementary Figure S8. Abundance of PPGs grouped by lifestyles for each city.** The lifestyle predictions and abundance quantifications were carried out as described in Material and Methods. For this analysis only Bacphlip predictions were used, despite the predictions of VIBRANT and CheckV.



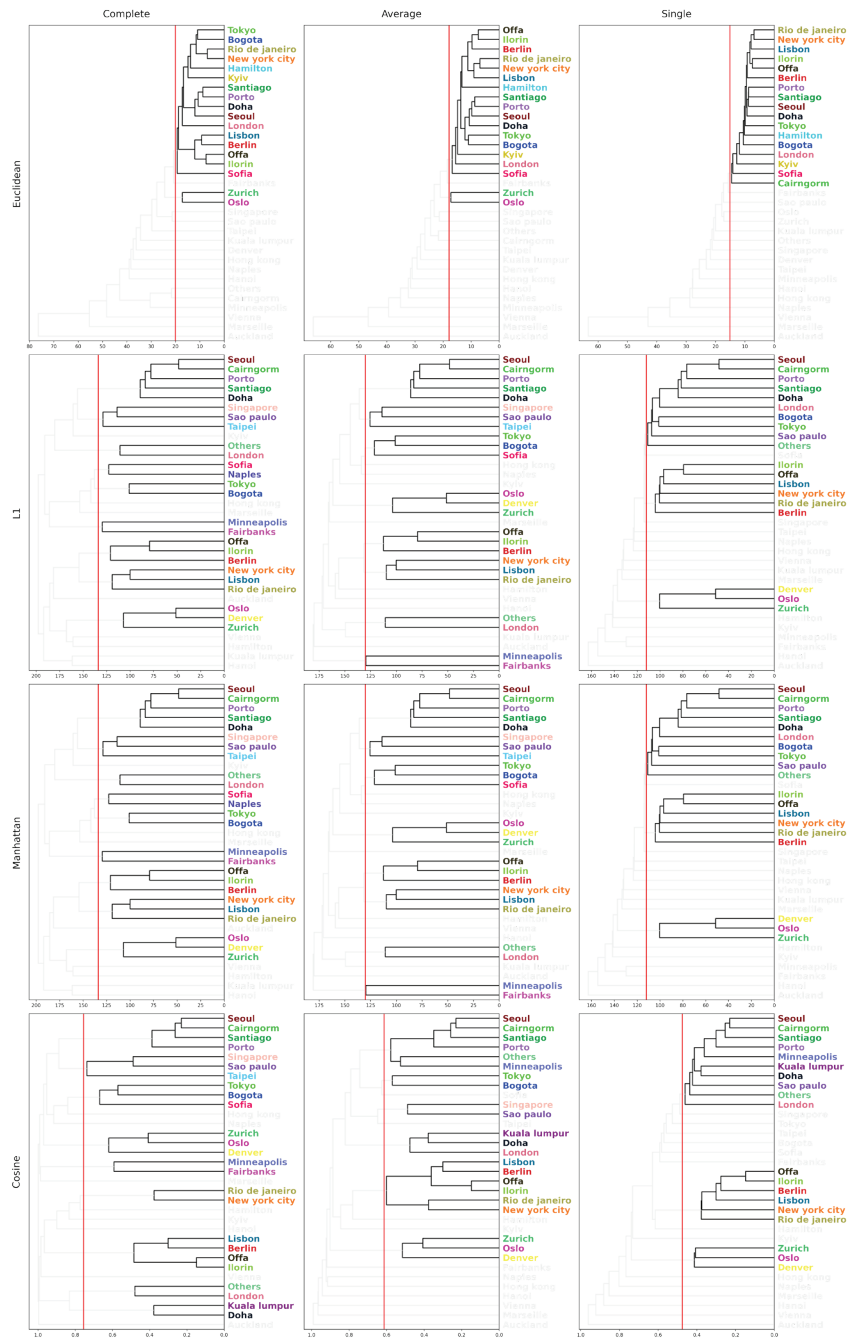

**Supplementary Figure S9. Clustering cities based on bacteriophage abundances.** Four clustering algorithms (y-axis) with three different metrics (x-axis) were applied for grouping the sampled cities based on PPGs abundances quantification. The red line marks the median value for each metric used per algorithm. The clusters with values above the median were highlighted.

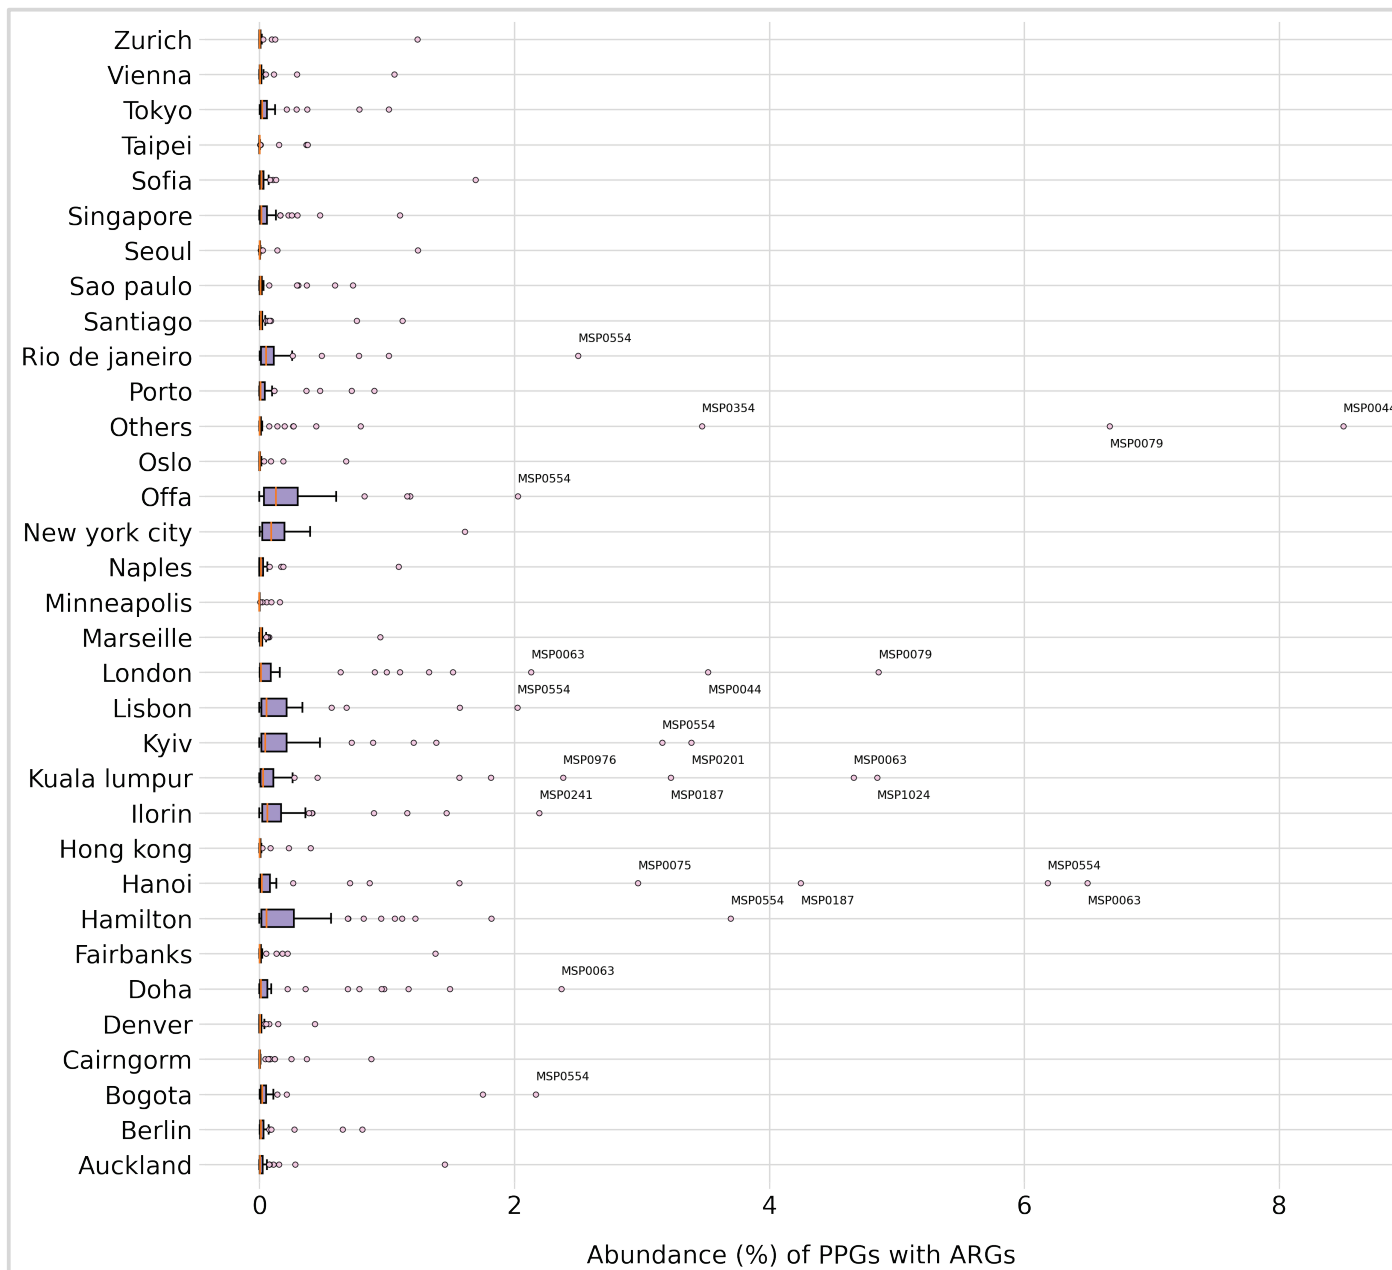

**Supplementary Figure S10. Abundances of PPGs identified as carriers of antibiotic resistance genes (ARGs).** Abundance distribution of PPGs identified with ARGs per city. The PPGs with more than 2 % of abundance were highlighted by showing their names.

Table S1

Supplementary Table S1. Summary of PPGs features.

| PPG     | Phage (Sample name + unique sequential id) | Size (bp) | DTR | Provirus | host_vHULK_genus | host_vHULK_species           | host_CRISPR                                                 | Lifestyle (Bac/hiip)         | Novelty                      | Cosmopolitanism (# cities appeared) | 75 most common |     |
|---------|--------------------------------------------|-----------|-----|----------|------------------|------------------------------|-------------------------------------------------------------|------------------------------|------------------------------|-------------------------------------|----------------|-----|
| MSP0001 | haib17CEM4890_H75CGCCXY_SL26364.1          | 572750    | yes | No       | Agrobacterium    | None                         |                                                             | virulent/lytic               | Yes                          | 30.0                                | 0.0            |     |
| MSP0002 | haib17CEM4890_HMCMJCCXY_SL335807.1         | 376117    | no  | No       |                  |                              |                                                             | virulent/lytic               | Yes                          | 21.0                                | 0.0            |     |
| MSP0003 | haib17CEM4890_H7KYMCCXY_SL273060.1         | 336762    | yes | No       |                  |                              | Streptococcus sp. I-G2                                      | prophage/temperate/lysogenic | No                           | 33.0                                | 0.0            |     |
| MSP0004 | haib17CEM4890_H2NYMCCXY_SL254829.21        | 311039    | no  | Yes      |                  |                              |                                                             | prophage/temperate/lysogenic | Yes                          | 13.0                                | 0.0            |     |
| MSP0005 | haib17CEM4890_H75CGCCXY_SL263663.3         | 304729    | yes | No       | Erwinia          | Erwinia amylovora            |                                                             | virulent/lytic               | Yes                          | 17.0                                | 0.0            |     |
| MSP0006 | haib17CEM4890_H2NYMCCXY_SL254846.1         | 290355    | no  | No       | Vibrio           | Vibrio alginolyticus         |                                                             | virulent/lytic               | Yes                          | 12.0                                | 0.0            |     |
| MSP0007 | haib17CEM4890_H2NYMCCXY_SL254843.29        | 271836    | yes | No       | Erwinia          | None                         |                                                             | virulent/lytic               | Yes                          | 10.0                                | 0.0            |     |
| MSP0008 | haib17CEM5106_HCY5HCCXY_SL270937.9         | 269557    | yes | No       | Erwinia          | Erwinia amylovora            |                                                             | virulent/lytic               | Yes                          | 14.0                                | 0.0            |     |
| MSP0010 | haib17CEM4890_H2NYMCCXY_SL254818.11        | 263436    | no  | No       |                  |                              |                                                             | virulent/lytic               | Yes                          | 22.0                                | 0.0            |     |
| MSP0011 | haib17CEM4890_H2NYMCCXY_SL254830.31        | 261774    | yes | No       | Erwinia          | None                         |                                                             | virulent/lytic               | Yes                          | 11.0                                | 0.0            |     |
| MSP0012 | haib17CEM4890_H7KYMCCXY_SL273056.1         | 260670    | no  | No       | Microbacterium   | Microbacterium foliorum      |                                                             | virulent/lytic               | Yes                          | 20.0                                | 0.0            |     |
| MSP0013 | haib17CEM4890_H2NYMCCXY_SL254772.24        | 258704    | yes | No       | Erwinia          | None                         |                                                             | virulent/lytic               | Yes                          | 21.0                                | 0.0            |     |
| MSP0014 | haib17CEM4890_H2NYMCCXY_SL254830.32        | 255896    | yes | No       | Erwinia          | None                         |                                                             | virulent/lytic               | Yes                          | 18.0                                | 0.0            |     |
| MSP0015 | haib17CEM4890_H2NYMCCXY_SL254814.4         | 252585    | yes | No       | Erwinia          | Erwinia amylovora            |                                                             | virulent/lytic               | Yes                          | 17.0                                | 0.0            |     |
| MSP0016 | haib17DB4959_H3MGVCCXY_SL259882.6          | 250778    | yes | No       |                  |                              |                                                             | prophage/temperate/lysogenic | Yes                          | 14.0                                | 0.0            |     |
| MSP0017 | haib17CEM4890_H2NYMCCXY_SL254855.29        | 250179    | yes | No       | Erwinia          | Erwinia amylovora            |                                                             | virulent/lytic               | Yes                          | 20.0                                | 0.0            |     |
| MSP0018 | haib17CEM4890_H2NYMCCXY_SL254855.31        | 249065    | no  | Yes      |                  |                              |                                                             | prophage/temperate/lysogenic | Yes                          | 14.0                                | 0.0            |     |
| MSP0019 | haib17KIU4866_H7HJMCCXY_SL272745.11        | 243203    | yes | No       | Dickeya          | None                         |                                                             | virulent/lytic               | Yes                          | 20.0                                | 0.0            |     |
| MSP0020 | haib17CEM4890_H2NYMCCXY_SL254826.5         | 242627    | yes | No       | Erwinia          | Erwinia amylovora            |                                                             | virulent/lytic               | Yes                          | 9.0                                 | 0.0            |     |
| MSP0022 | haib17CEM4890_H2NYMCCXY_SL254818.16        | 241516    | yes | No       | Dickeya          | None                         |                                                             | virulent/lytic               | Yes                          | 20.0                                | 0.0            |     |
| MSP0023 | haib17CEM4890_H2NYMCCXY_SL254807.13        | 237329    | yes | No       | Erwinia          | None                         |                                                             | virulent/lytic               | Yes                          | 6.0                                 | 0.0            |     |
| MSP0024 | haib17CEM4890_H2NYMCCXY_SL254861.1         | 231242    | yes | No       |                  |                              |                                                             | virulent/lytic               | Yes                          | 6.0                                 | 0.0            |     |
| MSP0025 | haib17KIU4866_H7HJMCCXY_SL272745.13        | 230175    | no  | No       | Dickeya          | None                         |                                                             | virulent/lytic               | Yes                          | 17.0                                | 0.0            |     |
| MSP0026 | haib17CEM5106_HCV72CCXY_SL269793.22        | 226068    | no  | Yes      | Klebsiella       | Klebsiella pneumoniae        | Salmonella enterica subsp. enterica serovar Waycross        | prophage/temperate/lysogenic | No                           | 33.0                                | 0.0            |     |
| MSP0027 | haib17KIU4866_H7HJMCCXY_SL272761.13        | 223601    | no  | Yes      |                  |                              |                                                             | prophage/temperate/lysogenic | Yes                          | 16.0                                | 0.0            |     |
| MSP0028 | haib17CEM4890_H2NYMCCXY_SL254830.39        | 222386    | yes | No       | Vibrio           | Vibrio alginolyticus         |                                                             | virulent/lytic               | Yes                          | 19.0                                | 0.0            |     |
| MSP0029 | haib17KIU4866_H7HJMCCXY_SL272759.1         | 220809    | yes | No       |                  |                              |                                                             | virulent/lytic               | Yes                          | 25.0                                | 0.0            |     |
| MSP0030 | haib17CEM4890_H75CGCCXY_SL263638.11        | 220684    | no  | No       | Erwinia          | Erwinia amylovora            |                                                             | virulent/lytic               | Yes                          | 12.0                                | 0.0            |     |
| MSP0031 | haib17CEM5106_HCY5JCCXY_SL269588.9         | 220558    | no  | Yes      |                  |                              | Lactobacillus curvatus                                      | prophage/temperate/lysogenic | Yes                          | 29.0                                | 0.0            |     |
| MSP0032 | haib17CEM4890_H2NYMCCXY_SL254854.24        | 219620    | yes | No       |                  |                              |                                                             | virulent/lytic               | Yes                          | 23.0                                | 0.0            |     |
| MSP0033 | haib17KIU4866_H7HJMCCXY_SL272745.15        | 219144    | no  | No       | Dickeya          | None                         |                                                             | virulent/lytic               | Yes                          | 14.0                                | 0.0            |     |
| MSP0034 | haib17CEM4890_H2NYMCCXY_SL254841.29        | 212281    | no  | No       |                  |                              | Clostridium botulinum                                       | prophage/temperate/lysogenic | Yes                          | 11.0                                | 0.0            |     |
| MSP0035 | haib17KIU4866_H7HJMCCXY_SL272803.21        | 200990    | no  | Yes      |                  |                              |                                                             | prophage/temperate/lysogenic | Yes                          | 18.0                                | 0.0            |     |
| MSP0036 | haib17CEM5106_HCY5HCCXY_SL270996.37        | 199672    | no  | Yes      | Listeria         | Listeria monocytogenes       | Listeria monocytogenes                                      | prophage/temperate/lysogenic | No                           | 22.0                                | 1.0            |     |
| MSP0037 | haib17KIU4866_H7HJMCCXY_SL272769.1         | 189859    | no  | No       |                  |                              |                                                             | virulent/lytic               | Yes                          | 17.0                                | 0.0            |     |
| MSP0038 | haib17CEM4890_HKC32ALXX_SL254693.38        | 188252    | no  | Yes      |                  |                              | Caldanaerobacter subterraneus subsp. tengcongensis MB4      | prophage/temperate/lysogenic | Yes                          | 29.0                                | 0.0            |     |
| MSP0040 | haib17KIU4866_H7HJMCCXY_SL272783.26        | 185019    | no  | No       |                  |                              |                                                             | prophage/temperate/lysogenic | Yes                          | 12.0                                | 0.0            |     |
| MSP0041 | haib17CEM5106_HCV72CCXY_SL269765.38        | 184925    | no  | Yes      | Gordonia         | Gordonia terrae              | Rhodococcus sp. ABRD24                                      | prophage/temperate/lysogenic | Yes                          | 28.0                                | 0.0            |     |
| MSP0042 | haib17CEM5106_HCV72CCXY_SL269730.36        | 184803    | no  | Yes      |                  |                              | Sporosarcina sp. PTS2304                                    | prophage/temperate/lysogenic | Yes                          | 26.0                                | 0.0            |     |
| MSP0043 | haib17CEM5106_HCY5HCCXY_SL270918.20        | 184773    | no  | Yes      |                  |                              | Rhodobacter sphaeroides                                     | prophage/temperate/lysogenic | Yes                          | 32.0                                | 0.0            |     |
| MSP0044 | haib17CEM5106_HCY5JCCXY_SL269534.32        | 181507    | no  | Yes      |                  |                              | Listeria weihenstephanensis                                 | prophage/temperate/lysogenic | No                           | 28.0                                | 0.0            |     |
| MSP0045 | haib17CEM4890_H75CGCCXY_SL263688.45        | 180388    | no  | Yes      |                  |                              | Salmonella enterica subsp. enterica serovar Wandsworth str. | prophage/temperate/lysogenic | Yes                          | 33.0                                | 1.0            |     |
| MSP0046 | haib17KIU4866_H7HJMCCXY_SL272773.32        | 177259    | no  | Yes      |                  |                              | Leclercia adecarboxylata                                    | prophage/temperate/lysogenic | No                           | 33.0                                | 0.0            |     |
| MSP0047 | haib17CEM4890_H2NYMCCXY_SL254782.56        | 175560    | no  | Yes      |                  |                              | Klebsiella pneumoniae subsp. pneumoniae                     | prophage/temperate/lysogenic | Yes                          | 33.0                                | 1.0            |     |
| MSP0048 | haib17KIU4866_H7HJMCCXY_SL272774.2         | 173561    | no  | No       | Erwinia          | Erwinia amylovora            |                                                             | virulent/lytic               | Yes                          | 12.0                                | 0.0            |     |
| MSP0049 | haib17CEM4890_HKC32ALXX_SL254712.8         | 171178    | no  | Yes      |                  |                              | Delftia tsuruhatensis                                       | prophage/temperate/lysogenic | Yes                          | 33.0                                | 0.0            |     |
| MSP0050 | haib17CEM4890_H2NYMCCXY_SL254770.20        | 169080    | no  | Yes      |                  |                              |                                                             | prophage/temperate/lysogenic | Yes                          | 16.0                                | 0.0            |     |
| MSP0051 | haib17CEM4890_HKC32ALXX_SL254706.35        | 167836    | yes | Yes      |                  |                              | Hungateiclostridium thermocellum DSM 1313                   | prophage/temperate/lysogenic | Yes                          | 9.0                                 | 0.0            |     |
| MSP0052 | haib17CEM4890_H2NYMCCXY_SL254826.16        | 167518    | yes | No       |                  |                              | Enterococcus durans                                         | prophage/temperate/lysogenic | Yes                          | 6.0                                 | 0.0            |     |
| MSP0054 | haib17CEM4890_H2NYMCCXY_SL254852.30        | 160372    | no  | Yes      | Faecalibacterium | Faecalibacterium prausnitzii |                                                             | prophage/temperate/lysogenic | Yes                          | 14.0                                | 0.0            |     |
| MSP0055 | haib17CEM4890_H2NYMCCXY_SL254772.76        | 160259    | no  | No       |                  |                              |                                                             | prophage/temperate/lysogenic | Yes                          | 31.0                                | 0.0            |     |
| MSP0056 | haib17CEM4890_H75CGCCXY_SL263690.12        | 160172    | no  | Yes      |                  |                              | Pseudomonas sp. CMR5c                                       | prophage/temperate/lysogenic | Yes                          | 33.0                                | 0.0            |     |
| MSP0057 | haib17CEM4890_H2NYMCCXY_SL254829.54        | 159868    | yes | No       |                  |                              | Clostridium botulinum H04402 065                            | prophage/temperate/lysogenic | Yes                          | 9.0                                 | 0.0            |     |
| MSP0058 | haib17CEM5106_HCVMTCCXY_SL269599.30        | 159093    | no  | Yes      |                  |                              | Pseudomonas stutzeri                                        | prophage/temperate/lysogenic | Yes                          | 33.0                                | 1.0            |     |
| MSP0059 | haib17CEM4890_HKC32ALXX_SL254764.81        | 158674    | no  | Yes      |                  |                              |                                                             | prophage/temperate/lysogenic | Yes                          | 17.0                                | 0.0            |     |
| MSP0060 | haib17KIU4866_H7HJMCCXY_SL272774.3         | 158408    | no  | No       | Bacillus         | Bacillus thuringiensis       | Paenibacillus crassostreae                                  | prophage/temperate/lysogenic | Yes                          | 7.0                                 | 0.0            |     |
| MSP0061 | haib17CEM4890_H2NYMCCXY_SL254819.69        | 158203    | no  | Yes      |                  |                              | Pseudomonas balcarica DSM 6083                              | prophage/temperate/lysogenic | Yes                          | 33.0                                | 1.0            |     |
| MSP0062 | haib17KIU4866_HMCMJCCXY_SL335947.29        | 157562    | no  | Yes      | Pseudomonas      | Pseudomonas aeruginosa       | Pseudomonas aeruginosa 19BR                                 | prophage/temperate/lysogenic | Yes                          | 33.0                                | 1.0            |     |
| MSP0063 | haib17CEM4890_HKC32ALXX_SL254726.5         | 155965    | no  | Yes      |                  |                              |                                                             | prophage/temperate/lysogenic | No                           | 33.0                                | 1.0            |     |
| MSP0064 | haib17CEM5106_HCCGHCCXY_SL270210.1         | 155131    | no  | No       | Arthrobacter     | Arthrobacter globiformis     |                                                             | virulent/lytic               | Yes                          | 27.0                                | 0.0            |     |
| MSP0065 | haib17CEM4890_H2NYMCCXY_SL254852.32        | 153533    | no  | Yes      | Staphylococcus   | Staphylococcus epidermidis   | Staphylococcus schleiferi                                   | prophage/temperate/lysogenic | No                           | 32.0                                | 0.0            |     |
| MSP0066 | haib17CEM4890_H2NYMCCXY_SL254770.25        | 152746    | yes | No       |                  |                              |                                                             | virulent/lytic               | Yes                          | 12.0                                | 0.0            |     |
| MSP0067 | haib17CEM4890_HKC32ALXX_SL254705.65        | 152455    | no  | Yes      |                  |                              |                                                             | Dickeya dianthicola IPO 980  | prophage/temperate/lysogenic | No                                  | 32.0           | 0.0 |
| MSP0068 | haib17CEM4890_H2NYMCCXY_SL254782.72        | 152226    | yes | No       |                  |                              |                                                             | prophage/temperate/lysogenic | Yes                          | 8.0                                 | 0.0            |     |
| MSP0069 | haib17CEM4890_H2NYMCCXY_SL254782.73        | 151871    | no  | Yes      |                  |                              |                                                             | prophage/temperate/lysogenic | Yes                          | 13.0                                | 0.0            |     |

Table S1

|         |                                      |        |     |     |                |                                   |                                                                              |                              |     |      |  |     |
|---------|--------------------------------------|--------|-----|-----|----------------|-----------------------------------|------------------------------------------------------------------------------|------------------------------|-----|------|--|-----|
| MSP0070 | haib18CEM5453_HMGNSCCXY_SL344676.1   | 151238 | no  | No  |                |                                   | <i>Klebsiella pneumoniae</i>                                                 | prophage/temperate/lysogenic | Yes | 32.0 |  | 1.0 |
| MSP0071 | haib17CEM4890_H2NYMCCXY_SL254772.86  | 151055 | yes | Yes |                |                                   |                                                                              | prophage/temperate/lysogenic | Yes | 6.0  |  | 0.0 |
| MSP0072 | haib17CEM4890_H2NYMCCXY_SL254818.48  | 150270 | yes | No  | Enterococcus   | <i>Enterococcus faecium</i>       | <i>Bacillus thuringiensis</i> serovar <i>indiana</i>                         | virulent/lytic               | Yes | 12.0 |  | 0.0 |
| MSP0073 | haib17KIU4866_H7HJMCCXY_SL272745.24  | 149315 | no  | Yes |                |                                   | <i>Kosakonia cowanii</i> JCM 10956 = DSM 18146                               | virulent/lytic               | Yes | 30.0 |  | 0.0 |
| MSP0074 | haib18CEM5453_HMC2KCCXY_SL336590.2   | 148901 | no  | Yes |                |                                   |                                                                              | prophage/temperate/lysogenic | Yes | 33.0 |  | 0.0 |
| MSP0075 | haib17KIU4866_H7HJMCCXY_SL272789.11  | 148646 | no  | No  |                |                                   |                                                                              | prophage/temperate/lysogenic | Yes | 33.0 |  | 0.0 |
| MSP0076 | haib17KIU4866_H7HJMCCXY_SL272771.12  | 148555 | no  | Yes |                |                                   | <i>Pluralibacter gergoviae</i>                                               | prophage/temperate/lysogenic | Yes | 31.0 |  | 0.0 |
| MSP0077 | haib17KIU4866_HMCMJCCXY_SL335937.1   | 148399 | no  | No  |                |                                   |                                                                              | virulent/lytic               | Yes | 17.0 |  | 0.0 |
| MSP0078 | haib17KIU4866_H7HJMCCXY_SL272816.29  | 147623 | no  | Yes | Pseudomonas    | <i>Pseudomonas fluorescens</i>    | <i>Pseudomonas stutzeri</i>                                                  | prophage/temperate/lysogenic | Yes | 33.0 |  | 0.0 |
| MSP0079 | haib17CEM5106_HCY5HCCXY_SL270996.63  | 147423 | no  | Yes |                |                                   | <i>Enterococcus faecalis</i> DENG1                                           | prophage/temperate/lysogenic | No  | 33.0 |  | 1.0 |
| MSP0081 | haib17CEM4890_H75CGCCXY_SL263637.8   | 146953 | no  | Yes |                |                                   |                                                                              | prophage/temperate/lysogenic | Yes | 18.0 |  | 0.0 |
| MSP0082 | haib17CEM4890_H75CGCCXY_SL263678.34  | 146358 | no  | Yes |                |                                   | <i>Salmonella enterica</i> subsp. <i>diarizonae</i>                          | prophage/temperate/lysogenic | No  | 33.0 |  | 1.0 |
| MSP0083 | haib17CEM4890_H7KYMCCXY_SL273067.9   | 146067 | no  | Yes | Staphylococcus | <i>Staphylococcus epidermidis</i> | <i>Staphylococcus schleiferi</i>                                             | prophage/temperate/lysogenic | No  | 32.0 |  | 0.0 |
| MSP0084 | haib18CEM5526_HMGJTCCXY_SL342622.32  | 145959 | no  | Yes | Pseudomonas    | <i>Pseudomonas aeruginosa</i>     | <i>Pseudomonas aeruginosa</i> DK2                                            | prophage/temperate/lysogenic | No  | 33.0 |  | 1.0 |
| MSP0085 | haib17CEM5106_HCVMTCCXY_SL269548.16  | 145192 | no  | Yes | Brochothrix    | <i>Brochothrix thermosphacta</i>  |                                                                              | prophage/temperate/lysogenic | No  | 21.0 |  | 0.0 |
| MSP0086 | haib17CEM4890_HMCMJCCXY_SL335783.12  | 145159 | no  | Yes | Pseudomonas    | <i>Pseudomonas aeruginosa</i>     |                                                                              | prophage/temperate/lysogenic | Yes | 30.0 |  | 1.0 |
| MSP0088 | haib17KIU4866_H7HJMCCXY_SL272800.21  | 143585 | no  | Yes |                |                                   |                                                                              | prophage/temperate/lysogenic | Yes | 18.0 |  | 0.0 |
| MSP0089 | haib18CEM5453_HMGW3CCXY_SL342291.36  | 142407 | no  | Yes | Pseudomonas    | <i>Pseudomonas aeruginosa</i>     | <i>Pseudomonas aeruginosa</i> 19BR                                           | virulent/lytic               | No  | 33.0 |  | 1.0 |
| MSP0090 | haib17CEM4890_H75CGCCXY_SL263716.15  | 142223 | no  | Yes |                |                                   | <i>Escherichia coli</i>                                                      | virulent/lytic               | Yes | 33.0 |  | 1.0 |
| MSP0091 | haib17CEM4890_H2NYMCCXY_SL254783.86  | 140295 | no  | No  |                |                                   | <i>Aminipila</i> sp. JN-18                                                   | prophage/temperate/lysogenic | Yes | 6.0  |  | 0.0 |
| MSP0094 | haib17CEM4890_HMCMJCCXY_SL335842.1   | 139326 | no  | No  |                |                                   |                                                                              | virulent/lytic               | Yes | 20.0 |  | 0.0 |
| MSP0095 | haib17CEM4890_H2NYMCCXY_SL254783.89  | 139259 | yes | No  |                |                                   |                                                                              | virulent/lytic               | Yes | 11.0 |  | 0.0 |
| MSP0097 | haib17CEM4890_H2NYMCCXY_SL254850.7   | 139153 | yes | No  |                |                                   |                                                                              | virulent/lytic               | Yes | 12.0 |  | 0.0 |
| MSP0101 | haib17KIU4866_H7HJMCCXY_SL272779.9   | 138912 | yes | No  |                |                                   |                                                                              | prophage/temperate/lysogenic | Yes | 5.0  |  | 0.0 |
| MSP0102 | haib17KIU4866_HMCMJCCXY_SL335938.25  | 138906 | no  | Yes |                |                                   | <i>Atlantibacter hermannii</i>                                               | virulent/lytic               | Yes | 30.0 |  | 0.0 |
| MSP0103 | haib17CEM5106_HCV72CCXY_SL269799.6   | 138771 | no  | Yes | Staphylococcus | <i>Staphylococcus aureus</i>      |                                                                              | prophage/temperate/lysogenic | Yes | 33.0 |  | 1.0 |
| MSP0104 | haib17CEM4890_H2NYMCCXY_SL254818.56  | 138238 | yes | No  |                |                                   |                                                                              | virulent/lytic               | Yes | 11.0 |  | 0.0 |
| MSP0105 | haib17CEM5106_HCY5JCCXY_SL269600.29  | 137996 | no  | Yes |                |                                   |                                                                              | prophage/temperate/lysogenic | Yes | 18.0 |  | 0.0 |
| MSP0106 | haib17CEM4890_H2NYMCCXY_SL254798.1   | 137625 | no  | Yes |                |                                   |                                                                              | prophage/temperate/lysogenic | Yes | 21.0 |  | 0.0 |
| MSP0107 | haib17CEM4890_HKC32ALXX_SL254681.55  | 137404 | no  | Yes |                |                                   |                                                                              | prophage/temperate/lysogenic | Yes | 15.0 |  | 0.0 |
| MSP0108 | haib17DB4959_H3MGVCCXY_SL259974.12   | 136599 | no  | Yes |                |                                   |                                                                              | prophage/temperate/lysogenic | No  | 25.0 |  | 0.0 |
| MSP0109 | haib17CEM4890_HKC32ALXX_SL254699.1   | 136299 | yes | No  |                |                                   | <i>Pseudomonas stutzeri</i> A1501                                            | prophage/temperate/lysogenic | Yes | 27.0 |  | 0.0 |
| MSP0110 | haib17KIU4866_H7HJMCCXY_SL272828.8   | 135769 | no  | Yes |                |                                   | <i>Herbix luporum</i>                                                        | prophage/temperate/lysogenic | Yes | 33.0 |  | 0.0 |
| MSP0111 | haib17DB4959_H3MGVCCXY_SL259966.25   | 135755 | no  | Yes |                |                                   | <i>Bacillus coagulans</i>                                                    | prophage/temperate/lysogenic | Yes | 30.0 |  | 0.0 |
| MSP0112 | haib17CEM5106_HCY5HCCXY_SL270986.38  | 135611 | no  | Yes |                |                                   |                                                                              | prophage/temperate/lysogenic | Yes | 19.0 |  | 0.0 |
| MSP0113 | haib17CEM5106_HCV72CCXY_SL269757.20  | 135563 | no  | Yes |                |                                   |                                                                              | prophage/temperate/lysogenic | Yes | 4.0  |  | 0.0 |
| MSP0114 | haib17CEM4890_H2NYMCCXY_SL254784.95  | 135398 | no  | No  | Bacillus       | <i>Bacillus cereus</i>            |                                                                              | virulent/lytic               | Yes | 33.0 |  | 1.0 |
| MSP0115 | haib17CEM4890_H75CGCCXY_SL263650.25  | 134934 | no  | Yes | Pseudomonas    | <i>Pseudomonas aeruginosa</i>     |                                                                              | virulent/lytic               | Yes | 33.0 |  | 1.0 |
| MSP0116 | haib17CEM5106_HCY5HCCXY_SL270996.74  | 134712 | no  | Yes | Pseudomonas    | <i>Pseudomonas aeruginosa</i>     | <i>Pseudomonas aeruginosa</i>                                                | prophage/temperate/lysogenic | No  | 33.0 |  | 1.0 |
| MSP0119 | haib17KIU4866_HMCMJCCXY_SL335949.27  | 134327 | no  | Yes |                |                                   | <i>Salmonella enterica</i> subsp. <i>enterica</i>                            | prophage/temperate/lysogenic | No  | 33.0 |  | 1.0 |
| MSP0120 | haib17CEM4890_HKC32ALXX_SL254705.85  | 133614 | no  | Yes |                |                                   |                                                                              | prophage/temperate/lysogenic | Yes | 17.0 |  | 0.0 |
| MSP0121 | haib17CEM4890_H2NYMCCXY_SL254783.96  | 133385 | yes | No  |                |                                   | <i>Clostridium cochlearium</i>                                               | prophage/temperate/lysogenic | Yes | 7.0  |  | 0.0 |
| MSP0122 | haib17CEM5106_HCV72CCXY_SL269805.49  | 132785 | no  | Yes |                |                                   |                                                                              | prophage/temperate/lysogenic | No  | 27.0 |  | 0.0 |
| MSP0123 | haib17CEM5106_HCVMTCCXY_SL269573.43  | 132662 | no  | Yes |                |                                   |                                                                              | prophage/temperate/lysogenic | No  | 32.0 |  | 0.0 |
| MSP0124 | haib17CEM4890_H2NYMCCXY_SL254807.44  | 132091 | yes | No  |                |                                   |                                                                              | prophage/temperate/lysogenic | Yes | 10.0 |  | 0.0 |
| MSP0125 | haib18CEM5453_HMC2KCCXY_SL336564.1   | 131891 | yes | No  |                |                                   |                                                                              | virulent/lytic               | Yes | 8.0  |  | 0.0 |
| MSP0127 | haib17CEM4890_H75CGCCXY_SL263638.22  | 131844 | no  | No  |                |                                   |                                                                              | virulent/lytic               | Yes | 16.0 |  | 0.0 |
| MSP0128 | haib17CEM4890_H2NYMCCXY_SL254795.82  | 131593 | no  | Yes |                |                                   | <i>Achromobacter denitrificans</i>                                           | virulent/lytic               | Yes | 32.0 |  | 0.0 |
| MSP0129 | haib17DB4959_H3MGVCCXY_SL259882.13   | 131518 | yes | No  |                |                                   | <i>Shewanella</i> sp. FDAARGOS_354                                           | virulent/lytic               | Yes | 6.0  |  | 0.0 |
| MSP0130 | haib17CEM4890_H75CGCCXY_SL263640.49  | 131481 | no  | Yes | Pseudomonas    | None                              | <i>Pseudomonas chlororaphis</i> subsp. <i>aurantiaca</i>                     | prophage/temperate/lysogenic | Yes | 27.0 |  | 0.0 |
| MSP0131 | haib17CEM4890_H75CGCCXY_SL263638.23  | 131465 | no  | Yes | Aeromonas      | <i>Aeromonas hydrophila</i>       |                                                                              | virulent/lytic               | Yes | 33.0 |  | 0.0 |
| MSP0132 | haib17CEM4890_H2NYMCCXY_SL254770.38  | 131384 | no  | Yes |                |                                   | <i>Salmonella enterica</i> subsp. <i>enterica</i> serovar <i>Weltevreden</i> | prophage/temperate/lysogenic | Yes | 33.0 |  | 1.0 |
| MSP0133 | haib17CEM4890_H2NYMCCXY_SL254790.8   | 130998 | no  | Yes |                |                                   | <i>Psychrobacter</i> sp. YP14                                                | prophage/temperate/lysogenic | Yes | 29.0 |  | 0.0 |
| MSP0134 | haib17CEM4890_H2NYMCCXY_SL254818.62  | 130714 | no  | Yes |                |                                   | <i>Clostridioides difficile</i>                                              | prophage/temperate/lysogenic | Yes | 13.0 |  | 0.0 |
| MSP0135 | haib17CEM5106_HCV72CCXY_SL269755.24  | 130400 | no  | Yes |                |                                   | <i>Pseudomonas stutzeri</i> A1501                                            | prophage/temperate/lysogenic | Yes | 33.0 |  | 1.0 |
| MSP0136 | haib17CEM4890_H75CGCCXY_SL263678.43  | 130023 | no  | Yes |                |                                   | <i>Rahnella aquatilis</i> CIP 78.65 = ATCC 33071                             | prophage/temperate/lysogenic | Yes | 33.0 |  | 0.0 |
| MSP0137 | haib17CEM5106_HCVMTCCXY_SL269538.60  | 129813 | no  | Yes |                |                                   |                                                                              | prophage/temperate/lysogenic | Yes | 29.0 |  | 0.0 |
| MSP0139 | haib17KIU4866_H7HJMCCXY_SL272768.5   | 128931 | no  | No  |                |                                   |                                                                              | virulent/lytic               | Yes | 6.0  |  | 0.0 |
| MSP0140 | haib17CEM5106_HCV72CCXY_SL269786.105 | 128187 | no  | Yes |                |                                   |                                                                              | prophage/temperate/lysogenic | No  | 33.0 |  | 0.0 |
| MSP0141 | haib17KIU4866_HMCMJCCXY_SL335946.4   | 127916 | no  | Yes |                |                                   | <i>Citrobacter koseri</i>                                                    | prophage/temperate/lysogenic | Yes | 32.0 |  | 0.0 |
| MSP0142 | haib17CEM4890_HKC32ALXX_SL254757.1   | 127779 | no  | No  |                |                                   |                                                                              | prophage/temperate/lysogenic | Yes | 33.0 |  | 0.0 |
| MSP0143 | haib17CEM5106_HCY5JCCXY_SL269611.24  | 127461 | no  | Yes |                |                                   |                                                                              | prophage/temperate/lysogenic | Yes | 11.0 |  | 0.0 |
| MSP0144 | haib17CEM4890_HMCMJCCXY_SL335843.14  | 127414 | no  | No  |                |                                   |                                                                              | virulent/lytic               | Yes | 17.0 |  | 0.0 |
| MSP0145 | haib17CEM4890_H2NYMCCXY_SL254770.41  | 127134 | no  | No  |                |                                   |                                                                              | virulent/lytic               | Yes | 14.0 |  | 0.0 |
| MSP0146 | haib17CEM5106_HCV72CCXY_SL269718.42  | 127053 | no  | Yes | Pseudomonas    | None                              | <i>Xanthomonas campestris</i> pv. <i>raphani</i> 756C                        | prophage/temperate/lysogenic | Yes | 32.0 |  | 0.0 |
| MSP0147 | haib17CEM4890_H2NYMCCXY_SL254783.101 | 127014 | yes | No  |                |                                   |                                                                              | prophage/temperate/lysogenic | Yes | 8.0  |  | 0.0 |
| MSP0148 | haib17CEM4890_H2NYMCCXY_SL254795.92  | 126300 | no  | Yes |                |                                   |                                                                              | prophage/temperate/lysogenic | Yes | 13.0 |  | 0.0 |
| MSP0149 | haib17CEM4890_H2NYMCCXY_SL254818.72  | 125820 | no  | No  |                |                                   |                                                                              | virulent/lytic               | Yes | 20.0 |  | 0.0 |

Table S1

|         |                                      |        |     |     |                |                            |                                                         |                              |     |      |     |
|---------|--------------------------------------|--------|-----|-----|----------------|----------------------------|---------------------------------------------------------|------------------------------|-----|------|-----|
| MSP0150 | haib17CEM4890_HKC32ALXX_SL254764.110 | 125751 | no  | Yes | Pseudomonas    | Pseudomonas fluorescens    | Pseudomonas stutzeri                                    | prophage/temperate/lysogenic | Yes | 33.0 | 0.0 |
| MSP0151 | haib17CEM5106_HCY5JCCXY_SL269596.64  | 125477 | no  | Yes |                |                            |                                                         | prophage/temperate/lysogenic | No  | 25.0 | 0.0 |
| MSP0152 | haib17CEM4890_H2NYMCCXY_SL254769.80  | 125361 | no  | Yes |                |                            |                                                         | prophage/temperate/lysogenic | Yes | 16.0 | 0.0 |
| MSP0153 | haib17CEM4890_H2NYMCCXY_SL254818.74  | 125262 | no  | Yes |                |                            |                                                         | prophage/temperate/lysogenic | Yes | 12.0 | 0.0 |
| MSP0154 | haib17CEM4890_H75CGCCXY_SL263641.45  | 124776 | no  | Yes |                |                            | Pragia fontium                                          | prophage/temperate/lysogenic | Yes | 31.0 | 0.0 |
| MSP0155 | haib17CEM5106_HCY5JCCXY_SL269527.32  | 124748 | no  | Yes |                |                            | Streptococcus thermophilus                              | prophage/temperate/lysogenic | No  | 31.0 | 0.0 |
| MSP0156 | haib17CEM4890_H75CGCCXY_SL263687.28  | 124697 | no  | Yes |                |                            | Salmonella enterica subsp. enterica                     | prophage/temperate/lysogenic | Yes | 33.0 | 1.0 |
| MSP0157 | haib17CEM4890_HKC32ALXX_SL254694.29  | 123937 | no  | Yes |                |                            |                                                         | prophage/temperate/lysogenic | Yes | 15.0 | 0.0 |
| MSP0158 | haib17CEM4890_H75CGCCXY_SL263652.51  | 123732 | no  | Yes |                |                            | Kosakonia cowanii JCM 10956 = DSM 18146                 | prophage/temperate/lysogenic | Yes | 33.0 | 0.0 |
| MSP0159 | haib17CEM4890_H2NYMCCXY_SL254858.7   | 123665 | no  | Yes |                |                            | Serratia plymuthica AS9                                 | prophage/temperate/lysogenic | No  | 32.0 | 0.0 |
| MSP0160 | haib17CEM5106_HCY5HCCXY_SL270906.19  | 123355 | no  | Yes |                |                            | Lactococcus piscium                                     | prophage/temperate/lysogenic | No  | 31.0 | 0.0 |
| MSP0161 | haib17CEM4890_H75CGCCXY_SL263689.41  | 123256 | no  | Yes |                |                            | Pseudomonas parafulva                                   | prophage/temperate/lysogenic | Yes | 33.0 | 0.0 |
| MSP0162 | haib17CEM4890_H75CGCCXY_SL263652.54  | 122447 | no  | Yes |                |                            |                                                         | prophage/temperate/lysogenic | Yes | 31.0 | 0.0 |
| MSP0163 | haib17KIU4866_H7HJMCCXY_SL272828.11  | 122357 | no  | Yes |                |                            | Pseudomonas aeruginosa                                  | prophage/temperate/lysogenic | Yes | 33.0 | 1.0 |
| MSP0164 | haib17CEM4890_H2NYMCCXY_SL254831.108 | 122016 | no  | Yes |                |                            |                                                         | prophage/temperate/lysogenic | Yes | 14.0 | 0.0 |
| MSP0165 | haib17CEM4890_H75CGCCXY_SL263712.54  | 121950 | no  | Yes |                |                            | Salmonella enterica subsp. enterica serovar Kentucky    | prophage/temperate/lysogenic | No  | 29.0 | 1.0 |
| MSP0166 | haib17CEM4890_H2NYMCCXY_SL254855.101 | 121781 | no  | Yes |                |                            |                                                         | prophage/temperate/lysogenic | Yes | 15.0 | 0.0 |
| MSP0167 | haib17CEM4890_H75CGCCXY_SL263637.13  | 121631 | no  | Yes |                |                            |                                                         | prophage/temperate/lysogenic | Yes | 17.0 | 0.0 |
| MSP0168 | haib17KIU4866_H7HJMCCXY_SL272776.39  | 121447 | no  | Yes |                |                            | Pantoea vagans                                          | prophage/temperate/lysogenic | No  | 32.0 | 0.0 |
| MSP0170 | haib17CEM4890_H2NYMCCXY_SL254784.125 | 121137 | yes | No  |                |                            | Clostridioides difficile                                | prophage/temperate/lysogenic | Yes | 5.0  | 0.0 |
| MSP0169 | haib17CEM4890_H2NYMCCXY_SL254788.33  | 121137 | no  | Yes |                |                            | Azotobacter vinelandii DJ                               | prophage/temperate/lysogenic | Yes | 32.0 | 0.0 |
| MSP0171 | haib17CEM5106_HCCGHCCXY_SL270510.132 | 121034 | no  | Yes | Salmonella     | None                       | Salmonella bongori N268-08                              | prophage/temperate/lysogenic | No  | 33.0 | 0.0 |
| MSP0172 | haib17CEM4890_H75CGCCXY_SL263647.37  | 121024 | no  | Yes |                |                            | Salmonella enterica subsp. enterica serovar Senftenberg | prophage/temperate/lysogenic | Yes | 32.0 | 1.0 |
| MSP0173 | haib17KIU4866_H7HJMCCXY_SL272744.7   | 120955 | no  | No  |                |                            |                                                         | virulent/lytic               | Yes | 6.0  | 0.0 |
| MSP0174 | haib17CEM4890_H2NYMCCXY_SL254784.126 | 120876 | no  | Yes |                |                            | Kosakonia cowanii JCM 10956 = DSM 18146                 | prophage/temperate/lysogenic | No  | 32.0 | 0.0 |
| MSP0176 | haib17CEM4890_H2NYMCCXY_SL254769.84  | 120548 | yes | No  |                |                            |                                                         | prophage/temperate/lysogenic | Yes | 5.0  | 0.0 |
| MSP0177 | haib17CEM4890_H2NYMCCXY_SL254831.114 | 120463 | no  | Yes |                |                            |                                                         | prophage/temperate/lysogenic | Yes | 15.0 | 0.0 |
| MSP0178 | haib17CEM4890_H2NYMCCXY_SL254841.67  | 120131 | no  | Yes |                |                            | Acinetobacter radioresistens                            | prophage/temperate/lysogenic | Yes | 32.0 | 0.0 |
| MSP0179 | haib17CEM5106_HCYMTCCXY_SL269617.43  | 119640 | no  | Yes |                |                            | Lactobacillus paracasei                                 | prophage/temperate/lysogenic | Yes | 33.0 | 0.0 |
| MSP0180 | haib17CEM4890_H2NYMCCXY_SL254817.76  | 119531 | no  | Yes |                |                            |                                                         | prophage/temperate/lysogenic | Yes | 14.0 | 0.0 |
| MSP0181 | haib17KIU4866_H7HJMCCXY_SL272801.1   | 119202 | no  | No  | Erwinia        | Erwinia amylovora          |                                                         | virulent/lytic               | Yes | 11.0 | 0.0 |
| MSP0182 | haib17CEM4890_H2NYMCCXY_SL254852.43  | 118815 | no  | Yes |                |                            |                                                         | prophage/temperate/lysogenic | Yes | 9.0  | 0.0 |
| MSP0183 | haib17CEM4890_H2NYMCCXY_SL254815.8   | 118206 | no  | Yes |                |                            |                                                         | prophage/temperate/lysogenic | Yes | 33.0 | 0.0 |
| MSP0184 | haib17CEM4890_H2NYMCCXY_SL254772.116 | 117835 | no  | Yes |                |                            |                                                         | prophage/temperate/lysogenic | Yes | 12.0 | 0.0 |
| MSP0185 | haib17CEM4890_HKC32ALXX_SL254705.97  | 117679 | yes | Yes |                |                            |                                                         | prophage/temperate/lysogenic | Yes | 7.0  | 0.0 |
| MSP0186 | haib17DB4959_H3MGVCCXY_SL259989.9    | 117558 | yes | Yes | Staphylococcus | Staphylococcus epidermidis |                                                         | prophage/temperate/lysogenic | Yes | 33.0 | 1.0 |
| MSP0187 | haib17CEM4890_H2NYMCCXY_SL254771.85  | 117534 | no  | Yes |                |                            | Salmonella enterica subsp. enterica serovar Sanjuan     | prophage/temperate/lysogenic | No  | 33.0 | 1.0 |
| MSP0188 | haib17CEM4890_H2NYMCCXY_SL254854.60  | 117383 | no  | Yes |                |                            | Serratia plymuthica AS9                                 | prophage/temperate/lysogenic | Yes | 33.0 | 0.0 |
| MSP0189 | haib17CEM4890_H2NYMCCXY_SL254782.100 | 116734 | no  | No  |                |                            | Clostridioides difficile                                | prophage/temperate/lysogenic | Yes | 9.0  | 0.0 |
| MSP0190 | haib17CEM4890_H2NYMCCXY_SL254806.85  | 116364 | no  | No  |                |                            |                                                         | virulent/lytic               | Yes | 23.0 | 0.0 |
| MSP0192 | haib17CEM4890_H2NYMCCXY_SL254832.6   | 115970 | no  | Yes | Pseudomonas    | Pseudomonas aeruginosa     | Pseudomonas aeruginosa                                  | prophage/temperate/lysogenic | No  | 33.0 | 1.0 |
| MSP0193 | haib17CEM4890_HKC32ALXX_SL254699.3   | 114688 | yes | Yes | Arthrobacter   | Arthrobacter globiformis   |                                                         | virulent/lytic               | Yes | 13.0 | 0.0 |
| MSP0195 | haib17CEM4890_H2NYMCCXY_SL254784.136 | 114443 | yes | No  |                |                            |                                                         | prophage/temperate/lysogenic | Yes | 10.0 | 0.0 |
| MSP0196 | haib17CEM5106_HCY5HCCXY_SL270934.46  | 114386 | no  | Yes | Lactobacillus  | None                       |                                                         | prophage/temperate/lysogenic | Yes | 26.0 | 0.0 |
| MSP0197 | haib17CEM5106_HCV72CCXY_SL269738.27  | 114373 | no  | Yes |                |                            |                                                         | prophage/temperate/lysogenic | Yes | 32.0 | 0.0 |
| MSP0198 | haib17CEM5106_HCYMTCCXY_SL269598.40  | 114173 | no  | Yes |                |                            |                                                         | prophage/temperate/lysogenic | Yes | 28.0 | 0.0 |
| MSP0199 | haib17CEM4890_HKC32ALXX_SL254716.25  | 113914 | no  | No  |                |                            |                                                         | prophage/temperate/lysogenic | Yes | 10.0 | 0.0 |
| MSP0200 | haib17KIU4866_H7HJMCCXY_SL272788.30  | 113713 | no  | Yes |                |                            | Methylobacterium album BG8                              | prophage/temperate/lysogenic | No  | 33.0 | 0.0 |
| MSP0201 | haib17CEM4890_HKC32ALXX_SL254680.87  | 113469 | no  | Yes |                |                            | Salmonella enterica subsp. enterica                     | prophage/temperate/lysogenic | No  | 33.0 | 1.0 |
| MSP0202 | haib17CEM5106_HCV72CCXY_SL269748.102 | 113314 | no  | Yes |                |                            | Pseudomonas sp. CMR12a                                  | prophage/temperate/lysogenic | Yes | 33.0 | 0.0 |
| MSP0203 | haib17CEM4890_H2NYMCCXY_SL254839.17  | 113215 | no  | Yes |                |                            | Pseudomonas citronellolis                               | prophage/temperate/lysogenic | Yes | 33.0 | 0.0 |
| MSP0204 | haib17CEM4890_H2NYMCCXY_SL254830.108 | 113038 | no  | Yes |                |                            |                                                         | prophage/temperate/lysogenic | No  | 19.0 | 0.0 |
| MSP0205 | haib17CEM5106_HCY5HCCXY_SL270942.24  | 112968 | no  | Yes |                |                            | Pseudomonas chlororaphis subsp. aurantiaca              | prophage/temperate/lysogenic | Yes | 33.0 | 0.0 |
| MSP0206 | haib17DB4959_H3MGVCCXY_SL259966.35   | 112610 | no  | Yes | Staphylococcus | Staphylococcus epidermidis | Staphylococcus schleiferi                               | prophage/temperate/lysogenic | No  | 31.0 | 0.0 |
| MSP0207 | haib17KIU4866_H7HJMCCXY_SL272759.5   | 112344 | no  | Yes |                |                            |                                                         | prophage/temperate/lysogenic | No  | 16.0 | 0.0 |
| MSP0208 | haib17CEM4890_H2NYMCCXY_SL254836.28  | 111872 | no  | Yes |                |                            |                                                         | prophage/temperate/lysogenic | Yes | 15.0 | 0.0 |
| MSP0209 | haib17CEM4890_H2NYMCCXY_SL254772.125 | 111737 | no  | Yes |                |                            |                                                         | prophage/temperate/lysogenic | Yes | 12.0 | 0.0 |
| MSP0210 | haib17KIU4866_H7HJMCCXY_SL272827.21  | 111628 | no  | Yes |                |                            |                                                         | prophage/temperate/lysogenic | Yes | 30.0 | 0.0 |
| MSP0211 | haib18CEM5453_HNHKFCXCY_SL345930.1   | 111560 | no  | Yes |                |                            |                                                         | virulent/lytic               | Yes | 27.0 | 0.0 |
| MSP0212 | haib18CEM5453_HMCKCCXY_SL336804.1    | 111523 | no  | No  |                |                            |                                                         | virulent/lytic               | Yes | 32.0 | 0.0 |
| MSP0213 | haib17CEM5106_HCV72CCXY_SL269749.73  | 111409 | no  | Yes |                |                            | Pseudomonas parafulva                                   | prophage/temperate/lysogenic | Yes | 29.0 | 0.0 |
| MSP0214 | haib17KIU4866_H7HJMCCXY_SL272759.6   | 111304 | no  | No  |                |                            |                                                         | prophage/temperate/lysogenic | Yes | 33.0 | 0.0 |
| MSP0215 | haib17KIU4866_HMCMCCXY_SL335948.19   | 111078 | no  | Yes |                |                            | Neisseria subflava                                      | prophage/temperate/lysogenic | No  | 32.0 | 0.0 |
| MSP0216 | haib17KIU4866_H7HJMCCXY_SL272752.13  | 111053 | no  | No  |                |                            |                                                         | virulent/lytic               | Yes | 21.0 | 0.0 |
| MSP0217 | haib17CEM5106_HCY5JCCXY_SL269588.30  | 110983 | no  | Yes |                |                            |                                                         | prophage/temperate/lysogenic | Yes | 27.0 | 0.0 |
| MSP0218 | haib17KIU4866_H7HJMCCXY_SL272796.65  | 110740 | no  | Yes |                |                            | Klebsiella oxytoca                                      | prophage/temperate/lysogenic | No  | 33.0 | 0.0 |
| MSP0219 | haib17CEM5106_HCV72CCXY_SL269751.33  | 110618 | no  | Yes | Pseudomonas    | Pseudomonas aeruginosa     | Pseudomonas stutzeri A1501                              | prophage/temperate/lysogenic | Yes | 33.0 | 0.0 |
| MSP0220 | haib17CEM5106_HCV72CCXY_SL269751.34  | 110486 | yes | No  |                |                            | Salmonella enterica subsp. diarizonae                   | prophage/temperate/lysogenic | No  | 23.0 | 1.0 |

Table S1

|         |               |                        |        |     |     |                |                            |                                                      |                         |                              |     |      |     |
|---------|---------------|------------------------|--------|-----|-----|----------------|----------------------------|------------------------------------------------------|-------------------------|------------------------------|-----|------|-----|
| MSP0221 | haib17CEM5106 | HCV72CCXY_SL269758.40  | 110343 | no  | Yes |                |                            |                                                      | Psychrobacter sp. P11G5 | prophage/temperate/lysogenic | Yes | 29.0 | 0.0 |
| MSP0222 | haib17CEM4890 | HKC32ALXX_SL254728.134 | 110200 | no  | Yes |                |                            |                                                      |                         | prophage/temperate/lysogenic | Yes | 11.0 | 0.0 |
| MSP0223 | haib17CEM4890 | H2NYMCCXY_SL254830.112 | 110188 | no  | Yes |                |                            |                                                      |                         | prophage/temperate/lysogenic | Yes | 15.0 | 0.0 |
| MSP0224 | haib17CEM4890 | HKC32ALXX_SL254711.17  | 110088 | no  | Yes | Lactobacillus  | Lactobacillus_casei        | Lactobacillus sp. CBA3606                            |                         | prophage/temperate/lysogenic | No  | 23.0 | 0.0 |
| MSP0225 | haib17CEM5106 | HCY5HCCXY_SL270959.75  | 110083 | no  | No  |                |                            | Bacillus safensis FO-36b                             |                         | prophage/temperate/lysogenic | Yes | 18.0 | 0.0 |
| MSP0226 | haib17CEM4890 | H75CGCCXY_SL263638.25  | 109959 | no  | Yes | Erwinia        | Erwinia_amylovora          |                                                      |                         | virulent/lytic               | Yes | 14.0 | 0.0 |
| MSP0227 | haib17CEM4890 | H75CGCCXY_SL263652.67  | 109704 | no  | Yes |                |                            | Pectobacterium brasiliense                           |                         | prophage/temperate/lysogenic | Yes | 33.0 | 0.0 |
| MSP0228 | haib17CEM4890 | HKC32ALXX_SL254680.91  | 109495 | no  | Yes |                |                            | Hungateiclostridium saccincola                       |                         | prophage/temperate/lysogenic | Yes | 17.0 | 0.0 |
| MSP0229 | haib17CEM4890 | H75CGCCXY_SL263647.42  | 109127 | no  | Yes |                |                            | Pseudomonas aeruginosa                               |                         | prophage/temperate/lysogenic | Yes | 32.0 | 1.0 |
| MSP0230 | haib17CEM4890 | HKC32ALXX_SL254742.102 | 108710 | no  | No  |                |                            |                                                      |                         | prophage/temperate/lysogenic | Yes | 13.0 | 0.0 |
| MSP0232 | haib17CEM4890 | H2NYMCCXY_SL254794.214 | 107755 | no  | Yes |                |                            |                                                      |                         | prophage/temperate/lysogenic | Yes | 14.0 | 0.0 |
| MSP0233 | haib17CEM4890 | H75CGCCXY_SL263712.63  | 107422 | no  | Yes |                |                            | Kosakonia cowanii JCM 10956 = DSM 18146              |                         | prophage/temperate/lysogenic | Yes | 33.0 | 0.0 |
| MSP0234 | haib17CEM5106 | HCVMTCCXY_SL269605.24  | 107298 | no  | Yes |                |                            |                                                      |                         | prophage/temperate/lysogenic | Yes | 31.0 | 0.0 |
| MSP0235 | haib17CEM4890 | H75CGCCXY_SL263651.38  | 106991 | no  | Yes |                |                            | Klebsiella pneumoniae                                |                         | prophage/temperate/lysogenic | Yes | 27.0 | 1.0 |
| MSP0236 | haib17DB4959  | H3MGVCCXY_SL259923.18  | 106819 | no  | Yes | Staphylococcus | Staphylococcus_epidermidis |                                                      |                         | prophage/temperate/lysogenic | No  | 31.0 | 1.0 |
| MSP0237 | haib17CEM4890 | H2NYMCCXY_SL254846.16  | 106548 | no  | Yes |                |                            | Salmonella enterica subsp. enterica serovar Waycross |                         | prophage/temperate/lysogenic | No  | 29.0 | 1.0 |
| MSP0238 | haib17CEM5106 | HCY5JCCXY_SL269596.75  | 105700 | no  | Yes |                |                            |                                                      |                         | virulent/lytic               | Yes | 17.0 | 0.0 |
| MSP0239 | haib17KIU4866 | H7HJMCCXY_SL272744.12  | 105263 | no  | No  | Erwinia        | None                       |                                                      |                         | virulent/lytic               | Yes | 17.0 | 0.0 |
| MSP0240 | haib17CEM5106 | HCVMTCCXY_SL269610.51  | 105094 | no  | Yes | Gordonia       | Gordonia_terrae            |                                                      |                         | prophage/temperate/lysogenic | Yes | 30.0 | 0.0 |
| MSP0241 | haib17CEM5106 | HCV72CCXY_SL269719.44  | 104857 | no  | Yes | Pseudomonas    | Pseudomonas_aeruginosa     | Pseudomonas stutzeri                                 |                         | prophage/temperate/lysogenic | Yes | 33.0 | 0.0 |
| MSP0242 | haib17CEM4890 | H2NYMCCXY_SL254769.98  | 104646 | no  | Yes |                |                            |                                                      |                         | prophage/temperate/lysogenic | Yes | 15.0 | 0.0 |
| MSP0243 | haib17CEM4890 | HKC32ALXX_SL254698.1   | 104563 | no  | No  |                |                            | Neisseria subflava                                   |                         | virulent/lytic               | Yes | 18.0 | 0.0 |
| MSP0244 | haib17CEM5106 | HCCGHCCXY_SL270294.1   | 104454 | yes | No  |                |                            |                                                      |                         | prophage/temperate/lysogenic | Yes | 28.0 | 0.0 |
| MSP0245 | haib17DB4959  | H3MGVCCXY_SL259989.13  | 104389 | no  | Yes | Staphylococcus | Staphylococcus_aureus      | Staphylococcus delphini                              |                         | prophage/temperate/lysogenic | No  | 28.0 | 0.0 |
| MSP0246 | haib17CEM4890 | H75CGCCXY_SL263689.46  | 104044 | no  | Yes |                |                            | Escherichia coli HS                                  |                         | prophage/temperate/lysogenic | Yes | 31.0 | 1.0 |
| MSP0247 | haib17CEM4890 | HKC32ALXX_SL254718.124 | 103873 | no  | Yes |                |                            |                                                      |                         | prophage/temperate/lysogenic | Yes | 17.0 | 0.0 |
| MSP0248 | haib17KIU4866 | H7HJMCCXY_SL272743.16  | 103804 | no  | Yes |                |                            | Serratia plymuthica AS9                              |                         | prophage/temperate/lysogenic | No  | 31.0 | 0.0 |
| MSP0249 | haib17CEM4890 | H2NYMCCXY_SL254795.138 | 103721 | no  | Yes |                |                            |                                                      |                         | prophage/temperate/lysogenic | No  | 33.0 | 0.0 |
| MSP0250 | haib17CEM5106 | HCY5JCCXY_SL269570.23  | 103641 | no  | Yes |                |                            |                                                      |                         | prophage/temperate/lysogenic | Yes | 33.0 | 0.0 |
| MSP0252 | haib17CEM5106 | HCVMTCCXY_SL269601.49  | 102813 | no  | Yes |                |                            | Pseudomonas chlororaphis                             |                         | prophage/temperate/lysogenic | No  | 32.0 | 0.0 |
| MSP0253 | haib17KIU4866 | H7HJMCCXY_SL272827.26  | 102662 | no  | Yes |                |                            | Serratia plymuthica AS9                              |                         | prophage/temperate/lysogenic | No  | 32.0 | 0.0 |
| MSP0254 | haib17KIU4866 | H7HJMCCXY_SL272774.7   | 102403 | no  | No  | Erwinia        | Erwinia_amylovora          |                                                      |                         | virulent/lytic               | Yes | 9.0  | 0.0 |
| MSP0255 | haib17CEM5106 | HCV72CCXY_SL269759.11  | 102110 | no  | Yes |                |                            | Dickeya zeae                                         |                         | prophage/temperate/lysogenic | Yes | 28.0 | 0.0 |
| MSP0256 | haib17CEM5106 | HCVMTCCXY_SL269535.68  | 102045 | no  | Yes | Gordonia       | Gordonia_terrae            |                                                      |                         | prophage/temperate/lysogenic | Yes | 28.0 | 0.0 |
| MSP0257 | haib17CEM4890 | HKC32ALXX_SL254681.106 | 101905 | no  | Yes |                |                            | Clostridium botulinum                                |                         | prophage/temperate/lysogenic | Yes | 15.0 | 0.0 |
| MSP0258 | haib17KIU4866 | H7HJMCCXY_SL272774.8   | 101602 | no  | Yes |                |                            |                                                      |                         | prophage/temperate/lysogenic | Yes | 32.0 | 0.0 |
| MSP0259 | haib17CEM5106 | HCV72CCXY_SL269793.56  | 101545 | no  | Yes |                |                            |                                                      |                         | prophage/temperate/lysogenic | Yes | 24.0 | 0.0 |
| MSP0260 | haib17CEM4890 | H75CGCCXY_SL263640.67  | 101504 | no  | Yes |                |                            |                                                      |                         | prophage/temperate/lysogenic | Yes | 33.0 | 0.0 |
| MSP0261 | haib17CEM4890 | H2NYMCCXY_SL254770.68  | 101217 | no  | Yes | Clostridium    | Clostridium_perfringens    |                                                      |                         | prophage/temperate/lysogenic | Yes | 12.0 | 0.0 |
| MSP0263 | haib17CEM4890 | H2NYMCCXY_SL254820.2   | 101164 | no  | Yes |                |                            | Enterobacter cloacae                                 |                         | prophage/temperate/lysogenic | No  | 32.0 | 0.0 |
| MSP0262 | haib17KIU4866 | H7HJMCCXY_SL272751.20  | 101164 | yes | No  |                |                            |                                                      |                         | virulent/lytic               | Yes | 5.0  | 0.0 |
| MSP0264 | haib17CEM4890 | H75CGCCXY_SL263714.34  | 100973 | no  | Yes |                |                            |                                                      |                         | prophage/temperate/lysogenic | Yes | 30.0 | 0.0 |
| MSP0265 | haib17CEM4890 | HMCJMCCXY_SL335833.79  | 100947 | no  | Yes | Staphylococcus | Staphylococcus_aureus      | Staphylococcus epidermidis                           |                         | prophage/temperate/lysogenic | No  | 32.0 | 0.0 |
| MSP0266 | haib17CEM4890 | H7KYMCCXY_SL273087.2   | 100635 | no  | No  |                |                            |                                                      |                         | virulent/lytic               | Yes | 17.0 | 0.0 |
| MSP0267 | haib17CEM4890 | H2NYMCCXY_SL254850.25  | 100605 | no  | No  | Acinetobacter  | Acinetobacter_baumannii    |                                                      |                         | virulent/lytic               | Yes | 17.0 | 1.0 |
| MSP0268 | haib17CEM5106 | HCV72CCXY_SL269738.33  | 100604 | no  | Yes | Gordonia       | Gordonia_terrae            |                                                      |                         | prophage/temperate/lysogenic | Yes | 30.0 | 0.0 |
| MSP0269 | haib17CEM4890 | H75CGCCXY_SL263677.15  | 100452 | no  | Yes |                |                            | Acinetobacter baumannii                              |                         | virulent/lytic               | No  | 31.0 | 1.0 |
| MSP0270 | haib17CEM4890 | H2NYMCCXY_SL254794.237 | 99942  | no  | Yes |                |                            | Acidovorax avenae subsp. avenae ATCC 19860           |                         | prophage/temperate/lysogenic | Yes | 33.0 | 0.0 |
| MSP0271 | haib17CEM4890 | H2NYMCCXY_SL254805.135 | 99731  | no  | Yes |                |                            |                                                      |                         | virulent/lytic               | Yes | 32.0 | 0.0 |
| MSP0272 | haib17CEM5106 | HCY5HCCXY_SL270997.32  | 99625  | no  | Yes |                |                            |                                                      |                         | virulent/lytic               | Yes | 25.0 | 0.0 |
| MSP0273 | haib17CEM5106 | HCY5JCCXY_SL270957.39  | 99596  | no  | Yes | Arthrobacter   | Arthrobacter_globiformis   |                                                      |                         | prophage/temperate/lysogenic | Yes | 32.0 | 0.0 |
| MSP0274 | haib17KIU4866 | H7HJMCCXY_SL272757.25  | 99418  | no  | Yes | Clostridium    | Clostridium_perfringens    |                                                      |                         | prophage/temperate/lysogenic | Yes | 14.0 | 0.0 |
| MSP0275 | haib17CEM4890 | H2NYMCCXY_SL254841.85  | 99346  | no  | Yes |                |                            |                                                      |                         | prophage/temperate/lysogenic | Yes | 11.0 | 0.0 |
| MSP0276 | haib17CEM5106 | HCV72CCXY_SL269782.23  | 99280  | no  | Yes | Arthrobacter   | Arthrobacter_globiformis   |                                                      |                         | prophage/temperate/lysogenic | Yes | 33.0 | 0.0 |
| MSP0277 | haib17CEM4890 | HKC32ALXX_SL254685.1   | 98848  | yes | No  | Acinetobacter  | Acinetobacter_baumannii    |                                                      |                         | virulent/lytic               | Yes | 14.0 | 1.0 |
| MSP0278 | haib17KIU4866 | H7HJMCCXY_SL272773.82  | 98817  | no  | Yes |                |                            | Pseudomonas aeruginosa 19BR                          |                         | prophage/temperate/lysogenic | Yes | 32.0 | 1.0 |
| MSP0279 | haib17CEM5106 | HCY5HCCXY_SL270981.43  | 98805  | no  | Yes |                |                            |                                                      |                         | prophage/temperate/lysogenic | Yes | 24.0 | 0.0 |
| MSP0280 | haib17KIU4866 | H7HJMCCXY_SL272777.31  | 98665  | no  | Yes |                |                            | Acinetobacter sp. LoGeW2-3                           |                         | prophage/temperate/lysogenic | Yes | 30.0 | 0.0 |
| MSP0281 | haib17KIU4866 | H7HJMCCXY_SL272778.35  | 98612  | no  | Yes |                |                            |                                                      |                         | prophage/temperate/lysogenic | Yes | 33.0 | 0.0 |
| MSP0282 | haib17CEM4890 | H2NYMCCXY_SL254818.105 | 98516  | no  | Yes |                |                            | Klebsiella pneumoniae subsp. pneumoniae              |                         | prophage/temperate/lysogenic | Yes | 17.0 | 1.0 |
| MSP0283 | haib17CEM5106 | HCVMTCCXY_SL269532.61  | 98174  | no  | Yes |                |                            | Pseudomonas chlororaphis subsp. aurantiaca           |                         | virulent/lytic               | Yes | 32.0 | 0.0 |
| MSP0284 | haib17CEM4890 | H2NYMCCXY_SL254829.120 | 97920  | no  | Yes |                |                            | Kosakonia cowanii JCM 10956 = DSM 18146              |                         | prophage/temperate/lysogenic | No  | 28.0 | 0.0 |
| MSP0285 | haib17CEM4890 | H2NYMCCXY_SL254854.85  | 97564  | no  | Yes |                |                            | Xenorhabdus doucetiae                                |                         | prophage/temperate/lysogenic | Yes | 29.0 | 0.0 |
| MSP0286 | haib17CEM4890 | HKC32ALXX_SL254675.1   | 97536  | no  | No  |                |                            |                                                      |                         | virulent/lytic               | Yes | 21.0 | 0.0 |
| MSP0287 | haib17DB4959  | H3MGVCCXY_SL259985.11  | 97503  | no  | No  |                |                            |                                                      |                         | virulent/lytic               | Yes | 20.0 | 0.0 |
| MSP0288 | haib17KIU4866 | HMCJMCCXY_SL335963.19  | 97492  | no  | Yes | Acinetobacter  | Acinetobacter_baumannii    | Acinetobacter baumannii                              |                         | prophage/temperate/lysogenic | No  | 32.0 | 1.0 |
| MSP0289 | haib17CEM4890 | H75CGCCXY_SL263654.27  | 97400  | no  | Yes | Cronobacter    | Cronobacter_sakazakii      | Dickeya sp. CSL RW240                                |                         | prophage/temperate/lysogenic | Yes | 31.0 | 0.0 |
| MSP0290 | haib17CEM4890 | H2NYMCCXY_SL254854.86  | 97395  | no  | Yes |                |                            | Citrobacter koseri                                   |                         | prophage/temperate/lysogenic | Yes | 33.0 | 0.0 |

Table S1

|         |                                      |       |     |     |                   |                         |                                                               |  |                              |     |      |  |     |
|---------|--------------------------------------|-------|-----|-----|-------------------|-------------------------|---------------------------------------------------------------|--|------------------------------|-----|------|--|-----|
| MSP0291 | haib17CEM4890_H2NYMCCXY_SL254806.118 | 97232 | no  | Yes |                   |                         |                                                               |  | prophage/temperate/lysogenic | Yes | 15.0 |  | 0.0 |
| MSP0293 | haib17CEM4890_H2NYMCCXY_SL254843.171 | 97193 | no  | Yes | Pseudomonas       | Pseudomonas aeruginosa  | Pseudomonas aeruginosa                                        |  | prophage/temperate/lysogenic | Yes | 33.0 |  | 1.0 |
| MSP0292 | haib17CEM4890_H7KYMCCXY_SL273127.9   | 97193 | no  | Yes | Staphylococcus    | None                    | Bacillus halodurans C-125                                     |  | prophage/temperate/lysogenic | No  | 33.0 |  | 0.0 |
| MSP0294 | haib17CEM4890_H2NYMCCXY_SL254795.154 | 97182 | no  | Yes |                   |                         |                                                               |  | prophage/temperate/lysogenic | Yes | 14.0 |  | 0.0 |
| MSP0295 | haib18CEM5453_HNHKFCXXY_SL345538.27  | 97154 | no  | No  |                   |                         |                                                               |  | prophage/temperate/lysogenic | Yes | 33.0 |  | 0.0 |
| MSP0296 | haib17CEM4890_H2NYMCCXY_SL254770.77  | 96982 | no  | No  |                   |                         |                                                               |  | prophage/temperate/lysogenic | Yes | 13.0 |  | 0.0 |
| MSP0297 | haib17CEM4890_H75CGCCXY_SL263647.49  | 96944 | no  | Yes |                   |                         |                                                               |  | prophage/temperate/lysogenic | Yes | 33.0 |  | 0.0 |
| MSP0298 | haib17CEM4890_H2NYMCCXY_SL254793.47  | 96484 | no  | Yes | Klebsiella        | Klebsiella pneumoniae   | Klebsiella pneumoniae subsp. pneumoniae                       |  | prophage/temperate/lysogenic | No  | 33.0 |  | 1.0 |
| MSP0299 | haib17CEM4890_H2NYMCCXY_SL254781.232 | 96347 | no  | Yes | Clostridium       | Clostridium perfringens |                                                               |  | prophage/temperate/lysogenic | No  | 13.0 |  | 0.0 |
| MSP0300 | haib17KIU4866_H7HJMCCXY_SL272796.80  | 96323 | no  | Yes |                   |                         | Klebsiella pneumoniae                                         |  | prophage/temperate/lysogenic | Yes | 26.0 |  | 1.0 |
| MSP0301 | haib17CEM5106_HCV72CCXY_SL269759.13  | 96175 | no  | Yes |                   |                         |                                                               |  | prophage/temperate/lysogenic | Yes | 19.0 |  | 0.0 |
| MSP0302 | haib17CEM4890_H75CGCCXY_SL263652.82  | 96131 | no  | Yes |                   |                         | Kosakonia cowanii JCM 10956 = DSM 18146                       |  | prophage/temperate/lysogenic | Yes | 29.0 |  | 0.0 |
| MSP0303 | haib17CEM5106_HCCGHCCXY_SL270433.3   | 96123 | yes | No  |                   |                         |                                                               |  | prophage/temperate/lysogenic | Yes | 20.0 |  | 0.0 |
| MSP0304 | haib17CEM4890_H75CGCCXY_SL263639.59  | 95974 | yes | No  |                   |                         | Salmonella enterica subsp. enterica serovar Bergen str. ST350 |  | prophage/temperate/lysogenic | Yes | 27.0 |  | 1.0 |
| MSP0305 | haib17KIU4866_H7HJMCCXY_SL272816.55  | 95323 | no  | Yes | Acinetobacter     | Acinetobacter baumannii | Acinetobacter baumannii                                       |  | prophage/temperate/lysogenic | Yes | 33.0 |  | 1.0 |
| MSP0306 | haib17CEM5106_HCY5JCCXY_SL269608.31  | 95262 | no  | Yes | Staphylococcus    | Staphylococcus aureus   |                                                               |  | prophage/temperate/lysogenic | Yes | 33.0 |  | 1.0 |
| MSP0307 | haib17CEM5106_HCY5JCCXY_SL269588.38  | 94886 | no  | Yes |                   |                         |                                                               |  | prophage/temperate/lysogenic | Yes | 25.0 |  | 0.0 |
| MSP0308 | haib17CEM5106_HCY5HCCXY_SL270953.45  | 94739 | no  | Yes | Propionibacterium | None                    | Acidipropionibacterium virtanenii                             |  | prophage/temperate/lysogenic | Yes | 33.0 |  | 0.0 |
| MSP0309 | haib17CEM4890_HKC32ALXX_SL254676.26  | 94718 | no  | No  |                   |                         |                                                               |  | prophage/temperate/lysogenic | Yes | 31.0 |  | 0.0 |
| MSP0310 | haib17CEM4890_H75CGCCXY_SL263713.43  | 94318 | no  | Yes |                   |                         | Cronobacter muytjensii ATCC 51329                             |  | prophage/temperate/lysogenic | Yes | 29.0 |  | 0.0 |
| MSP0311 | haib17CEM4890_H75CGCCXY_SL263685.21  | 94117 | no  | Yes |                   |                         |                                                               |  | prophage/temperate/lysogenic | Yes | 32.0 |  | 0.0 |
| MSP0312 | haib17CEM5106_HCVMTCCXY_SL269545.76  | 94104 | no  | Yes |                   |                         | Actinoalloteichis sp. GBA129-24                               |  | prophage/temperate/lysogenic | Yes | 32.0 |  | 0.0 |
| MSP0313 | haib17CEM5106_HCV72CCXY_SL269748.142 | 93761 | no  | Yes |                   |                         |                                                               |  | prophage/temperate/lysogenic | Yes | 30.0 |  | 0.0 |
| MSP0314 | haib17CEM4890_HMCMJCCXY_SL335783.22  | 93235 | no  | Yes |                   |                         | Shimwellia blattae DSM 4481 = NBRC 105725                     |  | prophage/temperate/lysogenic | Yes | 25.0 |  | 0.0 |
| MSP0315 | haib17CEM4890_H75CGCCXY_SL263654.34  | 93202 | no  | Yes |                   |                         | Pseudomonas balearica DSM 6083                                |  | prophage/temperate/lysogenic | No  | 33.0 |  | 1.0 |
| MSP0316 | haib17KIU4866_H7HJMCCXY_SL272816.60  | 93173 | no  | Yes |                   |                         |                                                               |  | prophage/temperate/lysogenic | Yes | 32.0 |  | 0.0 |
| MSP0317 | haib18CEM5453_HMGNSCCXY_SL344653.1   | 93109 | no  | No  |                   |                         |                                                               |  | prophage/temperate/lysogenic | Yes | 4.0  |  | 0.0 |
| MSP0318 | haib17CEM4890_H2NYMCCXY_SL254830.146 | 93055 | no  | No  |                   |                         |                                                               |  | prophage/temperate/lysogenic | Yes | 10.0 |  | 0.0 |
| MSP0319 | haib17CEM4890_H2NYMCCXY_SL254818.119 | 92930 | no  | Yes |                   |                         |                                                               |  | prophage/temperate/lysogenic | Yes | 12.0 |  | 0.0 |
| MSP0320 | haib18CEM5453_HMGW3CCXY_SL342350.1   | 92885 | no  | No  |                   |                         |                                                               |  | virulent/lytic               | Yes | 16.0 |  | 0.0 |
| MSP0321 | haib17CEM4890_H2NYMCCXY_SL254781.240 | 92840 | no  | Yes |                   |                         | Fusobacterium varium                                          |  | prophage/temperate/lysogenic | Yes | 15.0 |  | 0.0 |
| MSP0322 | haib17CEM5106_HCY5HCCXY_SL270956.1   | 92650 | no  | Yes |                   |                         |                                                               |  | prophage/temperate/lysogenic | Yes | 30.0 |  | 0.0 |
| MSP0323 | haib17CEM4890_HMCMJCCXY_SL335820.20  | 92556 | no  | Yes |                   |                         |                                                               |  | virulent/lytic               | Yes | 29.0 |  | 0.0 |
| MSP0325 | haib17CEM5106_HCY5HCCXY_SL270983.71  | 92403 | no  | Yes |                   |                         |                                                               |  | prophage/temperate/lysogenic | Yes | 26.0 |  | 0.0 |
| MSP0326 | haib17CEM4890_HMCMJCCXY_SL335833.89  | 92387 | no  | Yes |                   |                         | Acinetobacter sp. WCHA45                                      |  | prophage/temperate/lysogenic | Yes | 31.0 |  | 0.0 |
| MSP0327 | haib17KIU4866_HMCMJCCXY_SL335946.14  | 92191 | no  | Yes |                   |                         | Pasteurella multocida subsp. gallicida                        |  | prophage/temperate/lysogenic | Yes | 32.0 |  | 0.0 |
| MSP0328 | haib17CEM4890_H75CGCCXY_SL263687.41  | 92184 | no  | Yes |                   |                         | Escherichia coli 042                                          |  | prophage/temperate/lysogenic | No  | 31.0 |  | 1.0 |
| MSP0329 | haib17CEM4890_H2NYMCCXY_SL254829.128 | 92128 | no  | Yes |                   |                         |                                                               |  | prophage/temperate/lysogenic | Yes | 13.0 |  | 0.0 |
| MSP0330 | haib17DB4959_H3MGVCCXY_SL259974.23   | 91940 | no  | Yes |                   |                         | Enterococcus faecalis 62                                      |  | prophage/temperate/lysogenic | No  | 26.0 |  | 1.0 |
| MSP0331 | haib17CEM4890_H2NYMCCXY_SL254770.81  | 91930 | no  | Yes |                   |                         |                                                               |  | prophage/temperate/lysogenic | Yes | 13.0 |  | 0.0 |
| MSP0332 | haib17KIU4866_HMCMJCCXY_SL335956.64  | 91907 | no  | Yes |                   |                         |                                                               |  | prophage/temperate/lysogenic | Yes | 13.0 |  | 0.0 |
| MSP0333 | haib17CEM4890_HKC32ALXX_SL254700.22  | 91833 | no  | Yes |                   |                         |                                                               |  | prophage/temperate/lysogenic | Yes | 21.0 |  | 0.0 |
| MSP0334 | haib17KIU4866_HMCMJCCXY_SL335956.65  | 91771 | no  | Yes |                   |                         | Metakosakonia sp. MRY16-398                                   |  | prophage/temperate/lysogenic | Yes | 32.0 |  | 0.0 |
| MSP0335 | haib17CEM4890_H75CGCCXY_SL263649.60  | 91692 | no  | Yes |                   |                         |                                                               |  | virulent/lytic               | Yes | 21.0 |  | 0.0 |
| MSP0336 | haib17CEM4890_H2NYMCCXY_SL254806.129 | 91674 | no  | No  |                   |                         | Salmonella enterica subsp. diarizonae                         |  | prophage/temperate/lysogenic | No  | 33.0 |  | 1.0 |
| MSP0337 | haib17CEM4890_H2NYMCCXY_SL254780.155 | 91634 | no  | Yes |                   |                         |                                                               |  | prophage/temperate/lysogenic | Yes | 33.0 |  | 0.0 |
| MSP0338 | haib17CEM4890_H2NYMCCXY_SL254846.22  | 91116 | no  | Yes |                   |                         | Salmonella enterica subsp. enterica serovar Sanjuan           |  | prophage/temperate/lysogenic | No  | 32.0 |  | 1.0 |
| MSP0340 | haib17CEM4890_HKC32ALXX_SL254721.1   | 90901 | no  | No  |                   |                         |                                                               |  | virulent/lytic               | Yes | 20.0 |  | 0.0 |
| MSP0341 | haib17CEM4890_HKC32ALXX_SL254680.110 | 90860 | no  | Yes |                   |                         | Bacillus halodurans C-125                                     |  | prophage/temperate/lysogenic | Yes | 31.0 |  | 0.0 |
| MSP0342 | haib17CEM5106_HCV72CCXY_SL269765.88  | 90825 | no  | Yes |                   |                         |                                                               |  | prophage/temperate/lysogenic | Yes | 33.0 |  | 0.0 |
| MSP0343 | haib17CEM4890_H2NYMCCXY_SL254830.159 | 90745 | no  | Yes |                   |                         | Klebsiella michiganensis                                      |  | prophage/temperate/lysogenic | No  | 33.0 |  | 0.0 |
| MSP0344 | haib17KIU4866_H7HJMCCXY_SL272814.21  | 90704 | yes | No  |                   |                         | Klebsiella pneumoniae subsp. pneumoniae                       |  | prophage/temperate/lysogenic | Yes | 15.0 |  | 1.0 |
| MSP0345 | haib17CEM5106_HCVMTCCXY_SL269532.71  | 90675 | no  | Yes |                   |                         | Pseudomonas chlororaphis                                      |  | prophage/temperate/lysogenic | Yes | 30.0 |  | 0.0 |
| MSP0346 | haib17CEM4890_H75CGCCXY_SL263714.43  | 90404 | no  | Yes |                   |                         | Escherichia coli HS                                           |  | prophage/temperate/lysogenic | No  | 32.0 |  | 1.0 |
| MSP0347 | haib17CEM4890_H2NYMCCXY_SL254790.30  | 90180 | no  | No  |                   |                         |                                                               |  | prophage/temperate/lysogenic | Yes | 21.0 |  | 0.0 |
| MSP0348 | haib18CEM5453_HMC2KCCXY_SL336593.1   | 90010 | no  | No  |                   |                         | Pseudomonas aeruginosa                                        |  | prophage/temperate/lysogenic | Yes | 14.0 |  | 1.0 |
| MSP0349 | haib17CEM5106_HCV72CCXY_SL269742.68  | 89982 | no  | No  |                   |                         | Thermosiphon sp. 1070                                         |  | prophage/temperate/lysogenic | Yes | 13.0 |  | 0.0 |
| MSP0350 | haib17CEM4890_HMCMJCCXY_SL335787.17  | 89764 | yes | No  |                   |                         |                                                               |  | prophage/temperate/lysogenic | Yes | 8.0  |  | 0.0 |
| MSP0352 | haib17CEM4890_H2NYMCCXY_SL254783.180 | 89750 | no  | No  |                   |                         | Clostridium butyricum                                         |  | virulent/lytic               | Yes | 7.0  |  | 0.0 |
| MSP0353 | haib17CEM5106_HCY5HCCXY_SL270942.40  | 89635 | no  | Yes |                   |                         | Bordetella sp. J329                                           |  | prophage/temperate/lysogenic | Yes | 32.0 |  | 0.0 |
| MSP0354 | haib17CEM5106_HCY5JCCXY_SL269609.58  | 89626 | no  | Yes |                   |                         | Enterococcus faecalis 62                                      |  | prophage/temperate/lysogenic | No  | 29.0 |  | 1.0 |
| MSP0355 | haib17CEM4890_H2NYMCCXY_SL254856.32  | 89511 | no  | No  | Vibrio            | Vibrio alginolyticus    |                                                               |  | virulent/lytic               | Yes | 21.0 |  | 0.0 |
| MSP0356 | haib17KIU4866_H7HJMCCXY_SL272796.88  | 89332 | no  | Yes |                   |                         | Dickeya chrysanthemi Ech1591                                  |  | prophage/temperate/lysogenic | No  | 33.0 |  | 0.0 |
| MSP0357 | haib17CEM4890_H75CGCCXY_SL263663.29  | 89324 | no  | Yes |                   |                         | Pseudomonas sp. MRSN12121                                     |  | prophage/temperate/lysogenic | Yes | 32.0 |  | 0.0 |
| MSP0358 | haib17CEM4890_H2NYMCCXY_SL254809.2   | 89281 | no  | No  |                   |                         |                                                               |  | virulent/lytic               | Yes | 26.0 |  | 0.0 |
| MSP0359 | haib17KIU4866_H7HJMCCXY_SL272793.27  | 89103 | no  | No  |                   |                         |                                                               |  | virulent/lytic               | Yes | 16.0 |  | 0.0 |
| MSP0360 | haib17CEM5106_HCVMTCCXY_SL269612.42  | 89070 | no  | Yes |                   |                         |                                                               |  | prophage/temperate/lysogenic | Yes | 32.0 |  | 0.0 |
| MSP0361 | haib17CEM5106_HCY5HCCXY_SL270911.58  | 89043 | no  | Yes |                   |                         | Xanthomonas albilineans GPE PC73                              |  | prophage/temperate/lysogenic | Yes | 33.0 |  | 0.0 |

Table S1

|         |                                      |       |     |     |               |                         |                                                             |                              |     |      |     |     |
|---------|--------------------------------------|-------|-----|-----|---------------|-------------------------|-------------------------------------------------------------|------------------------------|-----|------|-----|-----|
| MSP0362 | haib17CEM4890_H2NYMCCXY_SL254781.255 | 88814 | no  | Yes |               |                         |                                                             | prophage/temperate/lysogenic | Yes | 14.0 |     | 0.0 |
| MSP0363 | haib17CEM4890_HKC32ALXX_SL254766.94  | 88803 | no  | Yes |               |                         |                                                             | Pectobacterium brasiliense   | No  | 31.0 |     | 0.0 |
| MSP0364 | haib17CEM5106_HCV72CCXY_SL269771.64  | 88709 | no  | Yes |               |                         |                                                             | Pseudomonas fluorescens      | Yes | 33.0 |     | 1.0 |
| MSP0365 | haib17CEM4890_H2NYMCCXY_SL254818.127 | 88705 | no  | Yes |               |                         |                                                             | prophage/temperate/lysogenic | Yes | 29.0 |     | 0.0 |
| MSP0366 | haib17CEM4890_HKC32ALXX_SL254751.6   | 88591 | no  | No  |               |                         |                                                             | virulent/lytic               | Yes | 11.0 |     | 0.0 |
| MSP0367 | haib17CEM5106_HCV72CCXY_SL269731.68  | 88510 | no  | Yes |               |                         |                                                             | prophage/temperate/lysogenic | Yes | 32.0 |     | 0.0 |
| MSP0368 | haib17KIU4866_H7HJMCCXY_SL272784.26  | 88492 | no  | Yes | Pseudomonas   | Pseudomonas aeruginosa  | Pseudomonas stutzeri                                        | prophage/temperate/lysogenic | Yes | 33.0 |     | 0.0 |
| MSP0369 | haib17CEM4890_H75CGCCXY_SL263663.30  | 88473 | no  | Yes |               |                         | Pseudomonas chlororaphis                                    | prophage/temperate/lysogenic | Yes | 33.0 |     | 0.0 |
| MSP0370 | haib17CEM4890_H7KYMCCXY_SL273087.3   | 88457 | no  | Yes |               |                         |                                                             | virulent/lytic               | Yes | 32.0 |     | 0.0 |
| MSP0371 | haib17CEM4890_H2NYMCCXY_SL254769.124 | 88432 | no  | Yes |               |                         |                                                             | prophage/temperate/lysogenic | Yes | 15.0 |     | 0.0 |
| MSP0372 | haib17CEM4890_HKC32ALXX_SL254752.88  | 88427 | no  | Yes |               |                         | Mixta calida                                                | prophage/temperate/lysogenic | Yes | 28.0 |     | 0.0 |
| MSP0373 | haib17DB4959_H3MGVCCXY_SL259963.82   | 87995 | no  | Yes | Pseudomonas   | Pseudomonas aeruginosa  |                                                             | virulent/lytic               | Yes | 33.0 | 1.0 | 0.0 |
| MSP0374 | haib17CEM4890_H2NYMCCXY_SL254861.16  | 87975 | yes | No  |               |                         |                                                             | prophage/temperate/lysogenic | No  | 21.0 |     | 0.0 |
| MSP0375 | haib17CEM5106_HCY5JCCXY_SL269609.60  | 87919 | no  | Yes |               |                         | Xanthomonas campestris pv. raphani 756C                     | prophage/temperate/lysogenic | Yes | 32.0 | 1.0 | 0.0 |
| MSP0376 | haib18CEM5453_HMC2KCCXY_SL336681.7   | 87914 | no  | No  |               |                         |                                                             | virulent/lytic               | No  | 30.0 |     | 0.0 |
| MSP0377 | haib17CEM4890_HKC32ALXX_SL254681.147 | 87717 | no  | No  |               |                         |                                                             | prophage/temperate/lysogenic | Yes | 16.0 |     | 0.0 |
| MSP0378 | haib17KIU4866_HMCMJCCXY_SL335957.23  | 87665 | yes | Yes |               |                         | Acinetobacter sp. ACNIH1                                    | prophage/temperate/lysogenic | Yes | 32.0 |     | 0.0 |
| MSP0379 | haib17KIU4866_H7HJMCCXY_SL272801.2   | 87638 | yes | No  | Escherichia   | Escherichia coli        | Klebsiella pneumoniae subsp. pneumoniae                     | prophage/temperate/lysogenic | Yes | 23.0 |     | 0.0 |
| MSP0380 | haib17CEM4890_H2NYMCCXY_SL254856.35  | 87401 | no  | Yes |               |                         | Serratia plymuthica PRI-2C                                  | prophage/temperate/lysogenic | Yes | 29.0 |     | 0.0 |
| MSP0381 | haib17KIU4866_H7HJMCCXY_SL272798.47  | 87395 | yes | No  |               |                         |                                                             | prophage/temperate/lysogenic | Yes | 18.0 |     | 0.0 |
| MSP0382 | haib17KIU4866_H7HJMCCXY_SL272813.6   | 87252 | no  | No  |               |                         |                                                             | prophage/temperate/lysogenic | Yes | 29.0 |     | 0.0 |
| MSP0383 | haib17CEM4890_H2NYMCCXY_SL254843.206 | 87081 | no  | Yes |               |                         |                                                             | prophage/temperate/lysogenic | No  | 20.0 |     | 0.0 |
| MSP0384 | haib17KIU4866_H7HJMCCXY_SL272792.4   | 87039 | no  | No  | Erwinia       | None                    |                                                             | virulent/lytic               | Yes | 15.0 |     | 0.0 |
| MSP0385 | haib17CEM4890_H2NYMCCXY_SL254783.187 | 87006 | no  | Yes |               |                         | Klebsiella pneumoniae                                       | prophage/temperate/lysogenic | No  | 28.0 | 1.0 | 0.0 |
| MSP0386 | haib17CEM5106_HCV72CCXY_SL269743.127 | 86889 | no  | Yes |               |                         |                                                             | prophage/temperate/lysogenic | Yes | 32.0 |     | 0.0 |
| MSP0387 | haib17KIU4866_H7HJMCCXY_SL272772.15  | 86639 | yes | No  |               |                         |                                                             | virulent/lytic               | Yes | 14.0 |     | 0.0 |
| MSP0388 | haib17CEM5106_HCV72CCXY_SL269728.73  | 86613 | no  | Yes |               |                         | Haliangium ochraceum DSM 14365                              | prophage/temperate/lysogenic | Yes | 33.0 |     | 0.0 |
| MSP0389 | haib17CEM4890_H3KHWCXY_SL263315.1    | 86528 | yes | No  |               |                         |                                                             | virulent/lytic               | Yes | 17.0 |     | 0.0 |
| MSP0391 | haib17KIU4866_H7HJMCCXY_SL272806.13  | 86403 | no  | No  |               |                         | Salmonella enterica subsp. enterica serovar Kentucky        | prophage/temperate/lysogenic | Yes | 21.0 | 1.0 | 0.0 |
| MSP0392 | haib17CEM4890_HKC32ALXX_SL254706.136 | 86359 | no  | No  |               |                         |                                                             | prophage/temperate/lysogenic | Yes | 14.0 |     | 0.0 |
| MSP0393 | haib17CEM5106_HCY5JCCXY_SL269609.64  | 86179 | yes | No  |               |                         |                                                             | virulent/lytic               | Yes | 10.0 |     | 0.0 |
| MSP0396 | haib17CEM4890_H2NYMCCXY_SL254843.214 | 86147 | no  | Yes |               |                         | Clostridioides difficile ATCC 9689 = DSM 1296               | prophage/temperate/lysogenic | Yes | 15.0 |     | 0.0 |
| MSP0398 | haib17CEM4890_H75CGCCXY_SL263678.59  | 85986 | no  | Yes |               |                         | Acinetobacter baumannii                                     | prophage/temperate/lysogenic | Yes | 32.0 | 1.0 | 0.0 |
| MSP0399 | haib17KIU4866_HMCMJCCXY_SL335957.24  | 85938 | no  | Yes |               |                         | Acinetobacter sp. ACNIH1                                    | prophage/temperate/lysogenic | Yes | 32.0 |     | 0.0 |
| MSP0400 | haib17CEM5106_HCVMTCCXY_SL269619.5   | 85869 | no  | Yes |               |                         | Listeria monocytogenes                                      | prophage/temperate/lysogenic | No  | 22.0 | 1.0 | 0.0 |
| MSP0401 | haib17CEM4890_H2NYMCCXY_SL254839.25  | 85817 | no  | Yes |               |                         | Pseudomonas chlororaphis subsp. aurantiaca                  | prophage/temperate/lysogenic | Yes | 33.0 |     | 0.0 |
| MSP0402 | haib17CEM4890_H75CGCCXY_SL263653.54  | 85631 | no  | Yes | Acinetobacter | Acinetobacter baumannii | Acinetobacter baumannii                                     | prophage/temperate/lysogenic | Yes | 28.0 | 1.0 | 0.0 |
| MSP0403 | haib17CEM4890_H2NYMCCXY_SL254771.133 | 85572 | yes | No  |               |                         |                                                             | prophage/temperate/lysogenic | Yes | 23.0 |     | 0.0 |
| MSP0404 | haib17CEM4890_HKC32ALXX_SL254725.1   | 85563 | no  | No  |               |                         | Pseudomonas aeruginosa                                      | virulent/lytic               | Yes | 28.0 | 1.0 | 0.0 |
| MSP0405 | haib17CEM4890_H2NYMCCXY_SL254818.136 | 85542 | no  | Yes |               |                         |                                                             | prophage/temperate/lysogenic | Yes | 12.0 |     | 0.0 |
| MSP0406 | haib17KIU4866_H7HJMCCXY_SL272774.12  | 85420 | yes | No  |               |                         |                                                             | virulent/lytic               | Yes | 15.0 |     | 0.0 |
| MSP0407 | haib17KIU4866_H7HJMCCXY_SL272752.27  | 85310 | no  | Yes |               |                         | Thauera hydrothermalis                                      | prophage/temperate/lysogenic | Yes | 33.0 |     | 0.0 |
| MSP0408 | haib17CEM5106_HCY5HCCXY_SL270961.54  | 85272 | no  | Yes |               |                         |                                                             | prophage/temperate/lysogenic | Yes | 24.0 |     | 0.0 |
| MSP0409 | haib17CEM4890_H75CGCCXY_SL263724.44  | 85183 | no  | Yes |               |                         | Salmonella enterica subsp. enterica serovar Montevideo str. | prophage/temperate/lysogenic | Yes | 30.0 | 1.0 | 0.0 |
| MSP0410 | haib17CEM4890_H2NYMCCXY_SL254783.190 | 85117 | no  | Yes |               |                         |                                                             | prophage/temperate/lysogenic | Yes | 12.0 |     | 0.0 |
| MSP0411 | haib17CEM4890_H2NYMCCXY_SL254772.182 | 84845 | no  | Yes |               |                         |                                                             | prophage/temperate/lysogenic | Yes | 17.0 |     | 0.0 |
| MSP0412 | haib17CEM5241_HMGMHCCXY_SL343354.1   | 84838 | yes | No  |               |                         |                                                             | virulent/lytic               | Yes | 31.0 |     | 0.0 |
| MSP0414 | haib17CEM4890_H2NYMCCXY_SL254795.190 | 84490 | no  | Yes |               |                         |                                                             | prophage/temperate/lysogenic | Yes | 14.0 |     | 0.0 |
| MSP0415 | haib17CEM4890_HKC32ALXX_SL254706.145 | 84340 | no  | Yes |               |                         | Pseudomonas sp. phDV1                                       | prophage/temperate/lysogenic | Yes | 33.0 |     | 0.0 |
| MSP0417 | haib17CEM5106_HCV72CCXY_SL269792.88  | 84096 | no  | Yes |               |                         | Enterococcus faecalis                                       | prophage/temperate/lysogenic | No  | 25.0 | 1.0 | 0.0 |
| MSP0418 | haib17CEM4890_H75CGCCXY_SL263700.63  | 84080 | no  | Yes |               |                         | Pseudomonas agarici                                         | prophage/temperate/lysogenic | No  | 31.0 | 0.0 | 0.0 |
| MSP0419 | haib17CEM5106_HCY5JCCXY_SL269583.27  | 84051 | no  | Yes | Rhodococcus   | Rhodococcus equi        |                                                             | prophage/temperate/lysogenic | Yes | 18.0 |     | 0.0 |
| MSP0420 | haib17CEM4890_H2NYMCCXY_SL254843.221 | 84040 | no  | Yes |               |                         | Methanoterris igneus Kol 5                                  | prophage/temperate/lysogenic | Yes | 17.0 |     | 0.0 |
| MSP0421 | haib17CEM5106_HCV72CCXY_SL269761.56  | 83862 | no  | Yes |               |                         | Leclercia adecarboxylata                                    | prophage/temperate/lysogenic | No  | 31.0 |     | 0.0 |
| MSP0423 | haib17CEM4890_H2NYMCCXY_SL254806.148 | 83766 | yes | No  |               |                         |                                                             | virulent/lytic               | Yes | 23.0 |     | 0.0 |
| MSP0428 | haib17CEM4890_H75CGCCXY_SL263647.59  | 83420 | no  | Yes |               |                         | Acinetobacter sp. WCHA45                                    | prophage/temperate/lysogenic | Yes | 33.0 |     | 0.0 |
| MSP0429 | haib17CEM4890_H75CGCCXY_SL263700.64  | 83368 | no  | Yes |               |                         |                                                             | prophage/temperate/lysogenic | Yes | 31.0 |     | 0.0 |
| MSP0430 | haib17CEM4890_H2NYMCCXY_SL254808.15  | 83345 | no  | Yes |               |                         | Xanthomonas campestris pv. raphani 756C                     | prophage/temperate/lysogenic | No  | 33.0 | 1.0 | 0.0 |
| MSP0431 | haib17CEM5106_HCV72CCXY_SL269754.141 | 83183 | no  | Yes |               |                         | Alloctinosynnema sp. L-07                                   | prophage/temperate/lysogenic | Yes | 33.0 |     | 0.0 |
| MSP0432 | haib17CEM4890_H2NYMCCXY_SL254783.196 | 83080 | no  | No  |               |                         | Pseudomonas balearica DSM 6083                              | prophage/temperate/lysogenic | Yes | 21.0 | 1.0 | 0.0 |
| MSP0433 | haib18CEM5453_HNHKFCXY_SL345930.2    | 82893 | yes | No  |               |                         |                                                             | virulent/lytic               | Yes | 20.0 |     | 0.0 |
| MSP0434 | haib17CEM4890_HKC32ALXX_SL254705.159 | 82887 | no  | Yes |               |                         |                                                             | prophage/temperate/lysogenic | Yes | 15.0 |     | 0.0 |
| MSP0435 | haib17CEM5106_HCY5JCCXY_SL269566.31  | 82852 | no  | Yes | Lactococcus   | None                    | Lactococcus sp. IJSPR-7                                     | virulent/lytic               | Yes | 30.0 |     | 0.0 |
| MSP0436 | haib17CEM5106_HCCGHCCXY_SL270206.1   | 82611 | yes | No  |               |                         |                                                             | virulent/lytic               | Yes | 25.0 |     | 0.0 |
| MSP0437 | haib18CEM5453_HMGNSCCXY_SL344702.7   | 82582 | no  | No  |               |                         |                                                             | virulent/lytic               | Yes | 16.0 |     | 0.0 |
| MSP0438 | haib17CEM4890_H2NYMCCXY_SL254861.18  | 82498 | no  | Yes |               |                         | Dickeya dianthicola                                         | prophage/temperate/lysogenic | Yes | 28.0 |     | 0.0 |
| MSP0440 | haib18CEM5453_HMCMJCCXY_SL336225.20  | 82156 | no  | Yes |               |                         | Providencia rettgeri                                        | prophage/temperate/lysogenic | No  | 24.0 |     | 0.0 |
| MSP0441 | haib17CEM5106_HCY5HCCXY_SL271123.25  | 82093 | no  | Yes |               |                         |                                                             | virulent/lytic               | Yes | 26.0 |     | 0.0 |



Table S1

|         |                                      |       |     |     |                |                            |                                                      |                              |     |      |     |
|---------|--------------------------------------|-------|-----|-----|----------------|----------------------------|------------------------------------------------------|------------------------------|-----|------|-----|
| MSP0442 | haib17CEM4890_H2NYMCCXY_SL254855.157 | 82063 | no  | Yes |                |                            |                                                      | prophage/temperate/lysogenic | Yes | 28.0 | 0.0 |
| MSP0443 | haib17CEM4890_HKC32ALXX_SL254706.152 | 82053 | no  | Yes |                |                            |                                                      | prophage/temperate/lysogenic | Yes | 32.0 | 0.0 |
| MSP0444 | haib17CEM5106_HCY5JCCXY_SL269599.67  | 81989 | no  | Yes |                |                            | Acinetobacter radioresistens                         | prophage/temperate/lysogenic | Yes | 33.0 | 1.0 |
| MSP0445 | haib17CEM4890_H75CGCCXY_SL263649.67  | 81910 | no  | Yes |                |                            | Pseudomonas stutzeri                                 | prophage/temperate/lysogenic | Yes | 28.0 | 1.0 |
| MSP0446 | haib17CEM4890_H75CGCCXY_SL263713.57  | 81710 | yes | No  |                |                            | Pseudomonas aeruginosa 19BR                          | prophage/temperate/lysogenic | Yes | 15.0 | 0.0 |
| MSP0448 | haib17CEM5106_HCY5HCCXY_SL270978.76  | 81683 | no  | Yes |                |                            |                                                      | virulent/lytic               | Yes | 32.0 | 0.0 |
| MSP0449 | haib17CEM4890_HKC32ALXX_SL254711.29  | 81436 | no  | Yes |                |                            |                                                      | prophage/temperate/lysogenic | Yes | 23.0 | 0.0 |
| MSP0450 | haib17CEM4890_H2NYMCCXY_SL254818.148 | 81339 | no  | No  |                |                            |                                                      | virulent/lytic               | Yes | 10.0 | 0.0 |
| MSP0451 | haib17KIU4866_H7HJMCCXY_SL272782.46  | 81324 | no  | No  |                |                            |                                                      | virulent/lytic               | Yes | 17.0 | 0.0 |
| MSP0452 | haib17CEM4890_H75CGCCXY_SL263647.60  | 81283 | no  | Yes |                |                            |                                                      | prophage/temperate/lysogenic | Yes | 32.0 | 0.0 |
| MSP0453 | haib17CEM4890_H75CGCCXY_SL263665.38  | 81267 | no  | Yes | Pseudomonas    | Pseudomonas fluorescens    | Pseudomonas stutzeri                                 | prophage/temperate/lysogenic | Yes | 31.0 | 0.0 |
| MSP0454 | haib17KIU4866_H7HJMCCXY_SL272752.29  | 81138 | no  | No  |                |                            |                                                      | prophage/temperate/lysogenic | Yes | 22.0 | 0.0 |
| MSP0455 | haib17CEM5106_HCVMTCCXY_SL269617.92  | 81101 | no  | Yes |                |                            |                                                      | virulent/lytic               | No  | 33.0 | 0.0 |
| MSP0456 | haib17CEM4890_H75CGCCXY_SL263686.14  | 81053 | yes | No  |                |                            |                                                      | prophage/temperate/lysogenic | Yes | 8.0  | 0.0 |
| MSP0457 | haib17CEM4890_H2NYMCCXY_SL254842.46  | 80881 | no  | Yes |                |                            |                                                      | prophage/temperate/lysogenic | Yes | 15.0 | 0.0 |
| MSP0458 | haib17KIU4866_HMCMJCCXY_SL335963.29  | 80868 | no  | Yes |                |                            |                                                      | prophage/temperate/lysogenic | Yes | 32.0 | 0.0 |
| MSP0459 | haib18CEM5526_HMGJCCXY_SL342622.65   | 80721 | no  | Yes |                |                            | Salmonella enterica subsp. diarizonae                | prophage/temperate/lysogenic | Yes | 30.0 | 1.0 |
| MSP0460 | haib17CEM4890_H75CGCCXY_SL263689.67  | 80611 | no  | Yes |                |                            | Pseudomonas aeruginosa                               | virulent/lytic               | Yes | 33.0 | 1.0 |
| MSP0461 | haib17CEM5106_HCV72CCXY_SL269786.181 | 80443 | no  | No  |                |                            | Klebsiella pneumoniae                                | prophage/temperate/lysogenic | Yes | 32.0 | 1.0 |
| MSP0463 | haib17CEM4890_HKC32ALXX_SL254693.114 | 80160 | no  | Yes |                |                            |                                                      | prophage/temperate/lysogenic | Yes | 10.0 | 0.0 |
| MSP0465 | haib17CEM5106_HCCGHCCXY_SL270257.1   | 79949 | no  | Yes |                |                            |                                                      | virulent/lytic               | Yes | 21.0 | 0.0 |
| MSP0466 | haib17CEM5106_HCVMTCCXY_SL269542.46  | 79902 | no  | Yes | Staphylococcus | Staphylococcus epidermidis |                                                      | prophage/temperate/lysogenic | Yes | 33.0 | 1.0 |
| MSP0467 | haib17CEM4890_H2NYMCCXY_SL254781.287 | 79645 | no  | Yes | Clostridium    | Clostridium perfringens    | Methanococcus voltae A3                              | prophage/temperate/lysogenic | Yes | 11.0 | 0.0 |
| MSP0468 | haib17CEM5241_HMGJMCCXY_SL343449.2   | 79483 | no  | No  |                |                            |                                                      | virulent/lytic               | Yes | 17.0 | 0.0 |
| MSP0469 | haib17CEM4890_HKC32ALXX_SL254722.26  | 79461 | no  | Yes | Xanthomonas    | None                       |                                                      | virulent/lytic               | Yes | 23.0 | 0.0 |
| MSP0470 | haib17CEM4890_H2NYMCCXY_SL254832.24  | 79276 | no  | No  |                |                            |                                                      | prophage/temperate/lysogenic | Yes | 15.0 | 0.0 |
| MSP0471 | haib17CEM4890_H2NYMCCXY_SL254844.8   | 79171 | yes | No  |                |                            |                                                      | prophage/temperate/lysogenic | Yes | 16.0 | 0.0 |
| MSP0472 | haib17CEM4890_H2NYMCCXY_SL254790.49  | 79014 | no  | Yes |                |                            | Moraxella osloensis                                  | prophage/temperate/lysogenic | Yes | 30.0 | 1.0 |
| MSP0473 | haib17CEM4890_H7KYMCCXY_SL273121.2   | 78847 | no  | No  |                |                            | Escherichia albertii                                 | virulent/lytic               | Yes | 12.0 | 0.0 |
| MSP0474 | haib17CEM4890_H75CGCCXY_SL263696.1   | 78810 | yes | No  |                |                            |                                                      | virulent/lytic               | Yes | 24.0 | 0.0 |
| MSP0475 | haib17CEM4890_H75CGCCXY_SL263699.61  | 78782 | no  | Yes |                |                            |                                                      | prophage/temperate/lysogenic | Yes | 11.0 | 0.0 |
| MSP0476 | haib17CEM4890_H2NYMCCXY_SL254850.33  | 78401 | no  | No  |                |                            |                                                      | virulent/lytic               | Yes | 15.0 | 0.0 |
| MSP0477 | haib17KIU4866_HMCMJCCXY_SL335961.3   | 78260 | no  | Yes |                |                            | Serratia plymuthica AS9                              | prophage/temperate/lysogenic | No  | 33.0 | 0.0 |
| MSP0478 | haib17CEM5106_HCV72CCXY_SL269767.65  | 78217 | no  | Yes | Paracoccus     | None                       |                                                      | prophage/temperate/lysogenic | Yes | 21.0 | 0.0 |
| MSP0479 | haib17KIU4866_H7HJMCCXY_SL272776.72  | 77994 | no  | Yes | Escherichia    | Escherichia coli           | Salmonella enterica subsp. enterica serovar Kentucky | prophage/temperate/lysogenic | Yes | 8.0  | 0.0 |
| MSP0481 | haib17KIU4866_H7HJMCCXY_SL272786.73  | 77814 | no  | Yes |                |                            |                                                      | prophage/temperate/lysogenic | Yes | 15.0 | 0.0 |
| MSP0483 | haib17CEM5106_HCCGHCCXY_SL270290.17  | 77755 | no  | No  |                |                            |                                                      | virulent/lytic               | Yes | 23.0 | 0.0 |
| MSP0484 | haib17CEM4890_H2NYMCCXY_SL254784.245 | 77544 | no  | Yes |                |                            |                                                      | prophage/temperate/lysogenic | Yes | 9.0  | 0.0 |
| MSP0485 | haib17CEM5106_HCV72CCXY_SL269754.150 | 77467 | no  | Yes |                |                            | Moraxella osloensis                                  | prophage/temperate/lysogenic | No  | 25.0 | 1.0 |
| MSP0486 | haib17KIU4866_H7HJMCCXY_SL272823.27  | 77371 | no  | Yes |                |                            | Acinetobacter baumannii                              | prophage/temperate/lysogenic | Yes | 32.0 | 1.0 |
| MSP0487 | haib17CEM4890_H2NYMCCXY_SL254837.14  | 77336 | yes | No  |                |                            |                                                      | prophage/temperate/lysogenic | Yes | 22.0 | 0.0 |
| MSP0488 | haib17CEM4890_H2NYMCCXY_SL254829.161 | 77324 | yes | No  |                |                            |                                                      | prophage/temperate/lysogenic | Yes | 25.0 | 0.0 |
| MSP0489 | haib17CEM4890_HKC32ALXX_SL254718.154 | 77071 | no  | Yes |                |                            | Klebsiella pneumoniae subsp. pneumoniae              | prophage/temperate/lysogenic | Yes | 32.0 | 1.0 |
| MSP0491 | haib17CEM4890_HKC32ALXX_SL254700.40  | 76991 | no  | No  |                |                            | Cutibacterium granulorum                             | virulent/lytic               | Yes | 29.0 | 1.0 |
| MSP0492 | haib17KIU4866_H7HJMCCXY_SL272826.77  | 76981 | no  | Yes |                |                            |                                                      | prophage/temperate/lysogenic | Yes | 14.0 | 0.0 |
| MSP0493 | haib17CEM4890_HKC32ALXX_SL254706.169 | 76964 | no  | Yes |                |                            | Citrobacter koseri                                   | prophage/temperate/lysogenic | Yes | 30.0 | 0.0 |
| MSP0494 | haib17CEM4890_H2NYMCCXY_SL254772.209 | 76933 | no  | Yes |                |                            |                                                      | prophage/temperate/lysogenic | No  | 14.0 | 0.0 |
| MSP0495 | haib17CEM4890_H2NYMCCXY_SL254848.34  | 76883 | yes | No  |                |                            |                                                      | prophage/temperate/lysogenic | Yes | 13.0 | 0.0 |
| MSP0496 | haib17CEM4890_H2NYMCCXY_SL254778.26  | 76830 | no  | Yes |                |                            |                                                      | prophage/temperate/lysogenic | Yes | 30.0 | 0.0 |
| MSP0497 | haib17CEM5106_HCVMTCCXY_SL269571.72  | 76714 | no  | Yes |                |                            |                                                      | prophage/temperate/lysogenic | Yes | 31.0 | 0.0 |
| MSP0498 | haib17DB4959_H3MGVCCXY_SL259985.15   | 76642 | no  | No  |                |                            |                                                      | virulent/lytic               | Yes | 24.0 | 0.0 |
| MSP0499 | haib17CEM5106_HCY5HCCXY_SL270916.44  | 76531 | no  | Yes |                |                            |                                                      | prophage/temperate/lysogenic | Yes | 31.0 | 0.0 |
| MSP0500 | haib17CEM4890_H2NYMCCXY_SL254818.165 | 76528 | no  | No  |                |                            |                                                      | virulent/lytic               | Yes | 14.0 | 0.0 |
| MSP0501 | haib17KIU4866_H7HJMCCXY_SL272796.104 | 76275 | no  | Yes | Klebsiella     | Klebsiella pneumoniae      | Dickeya chrysanthemi Ech1591                         | prophage/temperate/lysogenic | No  | 33.0 | 0.0 |
| MSP0502 | haib17KIU4866_H7HJMCCXY_SL272823.29  | 76265 | no  | Yes |                |                            | Acinetobacter sp. LoGeW2-3                           | prophage/temperate/lysogenic | Yes | 32.0 | 0.0 |
| MSP0503 | haib17CEM4890_H75CGCCXY_SL263652.126 | 76086 | no  | Yes |                |                            |                                                      | virulent/lytic               | Yes | 32.0 | 0.0 |
| MSP0504 | haib17KIU4866_H7HJMCCXY_SL272794.18  | 76073 | no  | Yes |                |                            |                                                      | prophage/temperate/lysogenic | Yes | 33.0 | 0.0 |
| MSP0505 | haib17KIU4866_H7HJMCCXY_SL272762.19  | 76008 | no  | Yes |                |                            | Delftia acidovorans                                  | prophage/temperate/lysogenic | Yes | 28.0 | 0.0 |
| MSP0506 | haib17CEM5106_HCY5HCCXY_SL270911.68  | 75954 | no  | No  |                |                            | Pseudomonas chlororaphis subsp. aurantiaca           | prophage/temperate/lysogenic | Yes | 20.0 | 0.0 |
| MSP0507 | haib17CEM4890_HKC32ALXX_SL254742.179 | 75900 | no  | Yes |                |                            |                                                      | prophage/temperate/lysogenic | Yes | 31.0 | 0.0 |
| MSP0509 | haib17CEM4890_H2NYMCCXY_SL254794.339 | 75868 | no  | Yes |                |                            | Klebsiella pneumoniae                                | prophage/temperate/lysogenic | Yes | 23.0 | 1.0 |
| MSP0510 | haib17CEM4890_H2NYMCCXY_SL254793.89  | 75784 | no  | Yes |                |                            |                                                      | prophage/temperate/lysogenic | No  | 33.0 | 0.0 |
| MSP0511 | haib17CEM5106_HCY5HCCXY_SL270975.77  | 75732 | no  | Yes |                |                            | Pseudomonas fluorescens                              | prophage/temperate/lysogenic | Yes | 33.0 | 1.0 |
| MSP0512 | haib17CEM5106_HCY5JCCXY_SL269560.18  | 75620 | no  | Yes |                |                            | Pseudomonas stutzeri A1501                           | virulent/lytic               | Yes | 30.0 | 1.0 |
| MSP0514 | haib17CEM4890_H2NYMCCXY_SL254818.172 | 75556 | no  | Yes |                |                            |                                                      | prophage/temperate/lysogenic | Yes | 31.0 | 0.0 |
| MSP0515 | haib17CEM5106_HCVMTCCXY_SL269598.69  | 75544 | no  | Yes |                |                            |                                                      | prophage/temperate/lysogenic | Yes | 33.0 | 0.0 |
| MSP0516 | haib17CEM4890_H2NYMCCXY_SL254826.75  | 75394 | no  | Yes |                |                            | Cronobacter mytjensii ATCC 51329                     | prophage/temperate/lysogenic | Yes | 27.0 | 0.0 |
| MSP0517 | haib17KIU4866_H7HJMCCXY_SL272757.38  | 75273 | no  | Yes |                |                            | Clostridium sp. JN-9                                 | prophage/temperate/lysogenic | Yes | 20.0 | 0.0 |

Table S1

|         |               |                        |       |     |     |                 |                                 |                                                             |                              |     |      |     |
|---------|---------------|------------------------|-------|-----|-----|-----------------|---------------------------------|-------------------------------------------------------------|------------------------------|-----|------|-----|
| MSP0518 | haib18CEM5453 | HNGH3CCXY_SL344575.1   | 75205 | no  | No  |                 |                                 |                                                             | virulent/lytic               | Yes | 23.0 | 0.0 |
| MSP0519 | haib17CEM5106 | HCV72CCXY_SL269730.126 | 75190 | no  | Yes |                 |                                 |                                                             | prophage/temperate/lysogenic | Yes | 32.0 | 0.0 |
| MSP0520 | haib17CEM4890 | H75CGCCXY_SL263654.48  | 75186 | no  | Yes |                 |                                 | Xanthomonas vasicola pv. vasculorum                         | prophage/temperate/lysogenic | Yes | 23.0 | 0.0 |
| MSP0521 | haib17CEM4890 | H2NYMCCXY_SL254852.94  | 75159 | no  | Yes | Staphylococcus  | Staphylococcus_pseudintermedius | Staphylococcus_pseudintermedius                             | prophage/temperate/lysogenic | No  | 19.0 | 0.0 |
| MSP0522 | haib17KIU4866 | H7HJMCCXY_SL272775.24  | 74921 | no  | Yes |                 |                                 | Pectobacterium parmentieri                                  | prophage/temperate/lysogenic | Yes | 33.0 | 0.0 |
| MSP0523 | haib17CEM5106 | HCY5HCCXY_SL270971.72  | 74916 | no  | Yes | Lactococcus     | Lactococcus_lactis              | Streptococcus_thermophilus ND03                             | prophage/temperate/lysogenic | No  | 29.0 | 0.0 |
| MSP0524 | haib17KIU4866 | H7HJMCCXY_SL272769.3   | 74845 | yes | No  | Pseudomonas     | Pseudomonas_fluorescens         |                                                             | prophage/temperate/lysogenic | Yes | 21.0 | 1.0 |
| MSP0526 | haib17KIU4866 | H7HJMCCXY_SL272768.29  | 74800 | no  | No  | Pseudomonas     | Pseudomonas_fluorescens         |                                                             | prophage/temperate/lysogenic | Yes | 20.0 | 1.0 |
| MSP0527 | haib17CEM5106 | HCV72CCXY_SL269785.80  | 74694 | no  | Yes |                 |                                 | Acidipropionibacterium_virtanenii                           | prophage/temperate/lysogenic | Yes | 32.0 | 0.0 |
| MSP0528 | haib17CEM4890 | H75CGCCXY_SL263716.39  | 74679 | yes | No  |                 |                                 |                                                             | prophage/temperate/lysogenic | Yes | 15.0 | 0.0 |
| MSP0529 | haib17CEM5106 | HCY5HCCXY_SL270976.125 | 74414 | no  | Yes | Gordonia        | Gordonia_terrac                 | Streptomyces_gilvosporeus                                   | prophage/temperate/lysogenic | Yes | 29.0 | 0.0 |
| MSP0530 | haib17CEM4890 | H75CGCCXY_SL263716.41  | 74239 | no  | Yes |                 |                                 |                                                             | prophage/temperate/lysogenic | Yes | 33.0 | 0.0 |
| MSP0531 | haib17CEM4890 | H2NYMCCXY_SL254791.34  | 74202 | no  | Yes |                 |                                 |                                                             | virulent/lytic               | Yes | 33.0 | 0.0 |
| MSP0533 | haib17CEM5106 | HCY5HCCXY_SL270975.80  | 74070 | no  | Yes |                 |                                 |                                                             | prophage/temperate/lysogenic | No  | 29.0 | 0.0 |
| MSP0534 | haib17CEM5106 | HCY5JCCXY_SL269535.116 | 74056 | no  | Yes |                 |                                 |                                                             | prophage/temperate/lysogenic | Yes | 31.0 | 0.0 |
| MSP0535 | haib17CEM4890 | H2NYMCCXY_SL254830.193 | 74049 | yes | No  |                 |                                 |                                                             | virulent/lytic               | Yes | 13.0 | 0.0 |
| MSP0536 | haib17CEM5106 | HCV72CCXY_SL269759.17  | 73858 | no  | Yes |                 |                                 |                                                             | virulent/lytic               | Yes | 30.0 | 0.0 |
| MSP0537 | haib17CEM4890 | HKC32ALXX_SL254706.181 | 73846 | no  | Yes |                 |                                 | Citrobacter_koseri                                          | prophage/temperate/lysogenic | Yes | 30.0 | 0.0 |
| MSP0538 | haib17CEM4890 | HMCJMCCXY_SL335794.20  | 73656 | no  | No  |                 |                                 | Saccharopolyspora_erythraea NRRL_2338                       | prophage/temperate/lysogenic | Yes | 20.0 | 0.0 |
| MSP0539 | haib17CEM4890 | H2NYMCCXY_SL254806.178 | 73396 | no  | Yes | Escherichia     | None                            | Serratia_marcescens                                         | virulent/lytic               | No  | 25.0 | 0.0 |
| MSP0540 | haib17CEM5106 | HCV72CCXY_SL269733.121 | 73340 | no  | Yes |                 |                                 | Saccharomonospora_glauca K62                                | prophage/temperate/lysogenic | Yes | 32.0 | 0.0 |
| MSP0541 | haib17KIU4866 | H7HJMCCXY_SL272743.25  | 73281 | no  | Yes |                 |                                 |                                                             | prophage/temperate/lysogenic | Yes | 30.0 | 0.0 |
| MSP0542 | haib17CEM5106 | HCVMTCCXY_SL269566.40  | 73280 | no  | Yes |                 |                                 |                                                             | prophage/temperate/lysogenic | Yes | 29.0 | 0.0 |
| MSP0543 | haib17CEM4890 | H2NYMCCXY_SL254855.176 | 73230 | no  | Yes |                 |                                 |                                                             | prophage/temperate/lysogenic | Yes | 13.0 | 0.0 |
| MSP0544 | haib17CEM4890 | H2NYMCCXY_SL254782.167 | 73046 | no  | Yes |                 |                                 |                                                             | prophage/temperate/lysogenic | Yes | 32.0 | 0.0 |
| MSP0545 | haib17CEM4890 | H75CGCCXY_SL263690.39  | 73026 | no  | Yes |                 |                                 |                                                             | prophage/temperate/lysogenic | Yes | 33.0 | 0.0 |
| MSP0546 | haib18CEM5453 | HNHKFCXCY_SL345590.3   | 72918 | no  | Yes |                 |                                 |                                                             | prophage/temperate/lysogenic | Yes | 32.0 | 0.0 |
| MSP0547 | haib17CEM4890 | H2NYMCCXY_SL254849.42  | 72858 | no  | No  |                 |                                 |                                                             | virulent/lytic               | Yes | 29.0 | 0.0 |
| MSP0548 | haib17CEM5106 | HCY5JCCXY_SL269564.22  | 72820 | no  | Yes |                 |                                 |                                                             | prophage/temperate/lysogenic | Yes | 17.0 | 0.0 |
| MSP0549 | haib17CEM5106 | HCV72CCXY_SL269792.109 | 72790 | no  | Yes |                 |                                 |                                                             | prophage/temperate/lysogenic | Yes | 33.0 | 0.0 |
| MSP0550 | haib17CEM5106 | HCY5HCCXY_SL270942.58  | 72662 | no  | Yes |                 |                                 | Delftia_acidovorans                                         | prophage/temperate/lysogenic | Yes | 26.0 | 0.0 |
| MSP0552 | haib17KIU4866 | H7HJMCCXY_SL272765.42  | 72334 | no  | Yes |                 |                                 |                                                             | prophage/temperate/lysogenic | Yes | 12.0 | 0.0 |
| MSP0553 | haib17CEM4890 | H75CGCCXY_SL263641.83  | 72316 | no  | Yes |                 |                                 | Pseudomonas_chlororaphis subsp. aurantiaca                  | prophage/temperate/lysogenic | Yes | 33.0 | 0.0 |
| MSP0554 | haib17CEM4890 | H2NYMCCXY_SL254831.218 | 72305 | no  | Yes |                 |                                 | Neisseria_lactamica 020-06                                  | prophage/temperate/lysogenic | No  | 33.0 | 0.0 |
| MSP0555 | haib17KIU4866 | HMCJMCCXY_SL335938.64  | 72279 | no  | Yes |                 |                                 | Dickeya_zeae NCPPB_3531                                     | virulent/lytic               | No  | 24.0 | 0.0 |
| MSP0556 | haib17CEM4890 | HKC32ALXX_SL254693.130 | 72153 | no  | Yes |                 |                                 |                                                             | prophage/temperate/lysogenic | Yes | 13.0 | 0.0 |
| MSP0557 | haib17CEM5106 | HCCGHCCXY_SL270210.6   | 72067 | yes | No  | Corynebacterium | Corynebacterium_vitaeuraminis   |                                                             | virulent/lytic               | Yes | 21.0 | 0.0 |
| MSP0558 | haib17CEM4890 | H2NYMCCXY_SL254817.142 | 72030 | no  | Yes |                 |                                 | Peptoniphilus_harei                                         | prophage/temperate/lysogenic | Yes | 12.0 | 0.0 |
| MSP0559 | haib17KIU4866 | H7HJMCCXY_SL272804.30  | 72023 | no  | Yes | Cronobacter     | Cronobacter_sakazakii           | Pectobacterium_parmentieri WPP163                           | prophage/temperate/lysogenic | No  | 33.0 | 0.0 |
| MSP0560 | haib17CEM4890 | HMCJMCCXY_SL335833.121 | 72005 | no  | Yes |                 |                                 |                                                             | prophage/temperate/lysogenic | Yes | 33.0 | 0.0 |
| MSP0561 | haib17CEM5106 | HCV72CCXY_SL269772.35  | 71980 | no  | No  |                 |                                 | Salmonella_enterica subsp. enterica                         | prophage/temperate/lysogenic | Yes | 19.0 | 1.0 |
| MSP0562 | haib17CEM4890 | HKC32ALXX_SL254706.192 | 71961 | no  | Yes |                 |                                 | Pectobacterium_versatile                                    | prophage/temperate/lysogenic | No  | 30.0 | 0.0 |
| MSP0563 | haib17CEM4890 | H2NYMCCXY_SL254807.123 | 71880 | no  | Yes |                 |                                 |                                                             | prophage/temperate/lysogenic | Yes | 5.0  | 0.0 |
| MSP0564 | haib17CEM4890 | H2NYMCCXY_SL254771.178 | 71843 | no  | Yes |                 |                                 | Salmonella_enterica subsp. diarizonae serovar 48:i:z        | prophage/temperate/lysogenic | Yes | 29.0 | 1.0 |
| MSP0565 | haib17CEM4890 | H2NYMCCXY_SL254853.71  | 71832 | no  | Yes |                 |                                 | Acinetobacter_sp. ACNIH1                                    | prophage/temperate/lysogenic | Yes | 32.0 | 0.0 |
| MSP0566 | haib17KIU4866 | H7HJMCCXY_SL272770.42  | 71812 | no  | Yes |                 |                                 |                                                             | prophage/temperate/lysogenic | Yes | 11.0 | 0.0 |
| MSP0567 | haib17CEM5106 | HCV72CCXY_SL269754.168 | 71808 | no  | Yes |                 |                                 | Gordonia_sp. YC-JH1                                         | prophage/temperate/lysogenic | Yes | 32.0 | 0.0 |
| MSP0568 | haib17CEM4890 | H2NYMCCXY_SL254818.185 | 71787 | yes | No  |                 |                                 |                                                             | prophage/temperate/lysogenic | Yes | 11.0 | 0.0 |
| MSP0569 | haib17CEM4890 | HKC32ALXX_SL254676.41  | 71639 | no  | Yes |                 |                                 |                                                             | prophage/temperate/lysogenic | Yes | 14.0 | 0.0 |
| MSP0570 | haib17CEM5106 | HCVMTCCXY_SL269559.66  | 71626 | no  | Yes |                 |                                 |                                                             | prophage/temperate/lysogenic | Yes | 33.0 | 0.0 |
| MSP0571 | haib17DB4959  | HMCJMCCXY_SL336180.1   | 71592 | yes | No  |                 |                                 |                                                             | virulent/lytic               | Yes | 23.0 | 0.0 |
| MSP0572 | haib17CEM4890 | H2NYMCCXY_SL254841.133 | 71402 | no  | Yes |                 |                                 |                                                             | prophage/temperate/lysogenic | Yes | 14.0 | 0.0 |
| MSP0573 | haib17CEM5106 | HCV72CCXY_SL269722.20  | 71331 | no  | Yes | Pseudomonas     | Pseudomonas_aeruginosa          | Pseudomonas_alcaliphila JAB1                                | virulent/lytic               | Yes | 33.0 | 0.0 |
| MSP0574 | haib17CEM4890 | HKC32ALXX_SL254677.1   | 71075 | no  | No  |                 |                                 |                                                             | prophage/temperate/lysogenic | Yes | 10.0 | 0.0 |
| MSP0575 | haib18CEM5453 | HT5YVCCXY_SL357286.1   | 70856 | no  | No  |                 |                                 |                                                             | virulent/lytic               | Yes | 19.0 | 0.0 |
| MSP0576 | haib17CEM4890 | HKC32ALXX_SL254696.4   | 70850 | no  | Yes |                 |                                 |                                                             | virulent/lytic               | Yes | 16.0 | 0.0 |
| MSP0577 | haib17CEM4890 | H75CGCCXY_SL263688.130 | 70737 | no  | Yes |                 |                                 | Salmonella_enterica subsp. enterica serovar Wandsworth str. | prophage/temperate/lysogenic | Yes | 21.0 | 1.0 |
| MSP0578 | haib17CEM5106 | HCV72CCXY_SL269718.84  | 70640 | no  | Yes |                 |                                 |                                                             | prophage/temperate/lysogenic | Yes | 23.0 | 0.0 |
| MSP0579 | haib17CEM4890 | HKC32ALXX_SL254707.11  | 70625 | no  | No  |                 |                                 | Micrococcus_luteus                                          | virulent/lytic               | Yes | 32.0 | 1.0 |
| MSP0580 | haib17CEM4890 | H75CGCCXY_SL263726.16  | 70362 | no  | Yes |                 |                                 |                                                             | prophage/temperate/lysogenic | Yes | 28.0 | 0.0 |
| MSP0581 | haib17KIU4866 | H7HJMCCXY_SL272827.63  | 70352 | no  | Yes |                 |                                 | Acinetobacter_indicus                                       | prophage/temperate/lysogenic | Yes | 32.0 | 0.0 |
| MSP0582 | haib17CEM4890 | H2NYMCCXY_SL254769.178 | 70309 | no  | Yes |                 |                                 |                                                             | prophage/temperate/lysogenic | Yes | 14.0 | 0.0 |
| MSP0583 | haib17KIU4866 | H7HJMCCXY_SL272826.95  | 70286 | no  | Yes |                 |                                 | Pseudomonas_aeruginosa                                      | prophage/temperate/lysogenic | Yes | 19.0 | 1.0 |
| MSP0584 | haib17CEM5106 | HCVMTCCXY_SL269527.39  | 70127 | no  | Yes |                 |                                 | Lactococcus_sp. 1JSPR-7                                     | virulent/lytic               | No  | 28.0 | 0.0 |
| MSP0586 | haib17CEM5106 | HCVMTCCXY_SL269607.96  | 70081 | no  | Yes | Enterococcus    | Enterococcus_faecalis           |                                                             | prophage/temperate/lysogenic | No  | 29.0 | 1.0 |
| MSP0587 | haib17CEM4890 | H2NYMCCXY_SL254848.37  | 70069 | no  | Yes | Staphylococcus  | Staphylococcus_aureus           | Bacillus_halodurans C-125                                   | prophage/temperate/lysogenic | No  | 33.0 | 0.0 |
| MSP0588 | haib17CEM4890 | H2NYMCCXY_SL254794.375 | 69987 | no  | Yes |                 |                                 |                                                             | prophage/temperate/lysogenic | Yes | 14.0 | 0.0 |
| MSP0589 | haib17CEM4890 | H2NYMCCXY_SL254790.62  | 69960 | no  | No  |                 |                                 |                                                             | prophage/temperate/lysogenic | Yes | 17.0 | 0.0 |

Table S1

|         |               |                        |       |     |     |                 |                                    |                                                                            |                              |     |      |     |
|---------|---------------|------------------------|-------|-----|-----|-----------------|------------------------------------|----------------------------------------------------------------------------|------------------------------|-----|------|-----|
| MSP0590 | haib18CEM5453 | HMC MJCCXY_SL336349.1  | 69873 | no  | No  |                 |                                    | <i>Klebsiella pneumoniae</i> subsp. <i>pneumoniae</i>                      | prophage/temperate/lysogenic | Yes | 32.0 | 1.0 |
| MSP0591 | haib17CEM5106 | HCVMTCCXY_SL269598.78  | 69866 | no  | Yes |                 |                                    |                                                                            | prophage/temperate/lysogenic | Yes | 17.0 | 0.0 |
| MSP0592 | haib17CEM5106 | HCY5JCCXY_SL269570.35  | 69813 | no  | Yes |                 |                                    |                                                                            | prophage/temperate/lysogenic | Yes | 28.0 | 0.0 |
| MSP0593 | haib17CEM4890 | HKC32ALXX_SL254694.83  | 69647 | no  | Yes |                 |                                    | <i>Pasteurella multocida</i>                                               | prophage/temperate/lysogenic | Yes | 15.0 | 0.0 |
| MSP0594 | haib17KIU4866 | H7HJMCCXY_SL272778.71  | 69643 | no  | Yes |                 |                                    |                                                                            | prophage/temperate/lysogenic | Yes | 32.0 | 0.0 |
| MSP0595 | haib17CEM4890 | HKC32ALXX_SL254723.1   | 69521 | no  | No  |                 |                                    |                                                                            | prophage/temperate/lysogenic | Yes | 18.0 | 0.0 |
| MSP0596 | haib17CEM5106 | HCY5JCCXY_SL269601.55  | 69436 | no  | Yes |                 |                                    |                                                                            | prophage/temperate/lysogenic | Yes | 33.0 | 0.0 |
| MSP0598 | haib17CEM4890 | H2NYMCCXY_SL254770.147 | 69395 | no  | No  |                 |                                    |                                                                            | prophage/temperate/lysogenic | Yes | 33.0 | 0.0 |
| MSP0599 | haib17CEM5106 | HCY5HCCXY_SL270911.76  | 69385 | no  | Yes |                 |                                    |                                                                            | virulent/lytic               | Yes | 33.0 | 0.0 |
| MSP0600 | haib17CEM4890 | H75CGCCXY_SL263639.82  | 69316 | no  | Yes |                 |                                    | <i>Pseudomonas chlororaphis</i> subsp. <i>aurantiaca</i>                   | prophage/temperate/lysogenic | Yes | 33.0 | 0.0 |
| MSP0601 | haib17CEM4890 | H2NYMCCXY_SL254806.197 | 69300 | no  | Yes |                 |                                    |                                                                            | prophage/temperate/lysogenic | Yes | 13.0 | 0.0 |
| MSP0602 | haib17CEM4890 | HKC32ALXX_SL254728.210 | 69295 | no  | No  | Bacillus        | Bacillus thuringiensis             |                                                                            | prophage/temperate/lysogenic | Yes | 9.0  | 0.0 |
| MSP0603 | haib17CEM4890 | HMC MJCCXY_SL335794.24 | 69225 | no  | Yes | Pseudomonas     | <i>Pseudomonas fluorescens</i>     |                                                                            | prophage/temperate/lysogenic | Yes | 33.0 | 1.0 |
| MSP0604 | haib17CEM4890 | HKC32ALXX_SL254688.9   | 69190 | no  | No  |                 |                                    |                                                                            | virulent/lytic               | Yes | 9.0  | 0.0 |
| MSP0605 | haib17CEM4890 | H2NYMCCXY_SL254842.61  | 69137 | no  | Yes |                 |                                    |                                                                            | prophage/temperate/lysogenic | Yes | 14.0 | 0.0 |
| MSP0606 | haib17CEM5106 | HCVMTCCXY_SL269561.50  | 69117 | no  | Yes |                 |                                    | <i>Xanthomonas campestris</i> pv. <i>raphani</i> 756C                      | prophage/temperate/lysogenic | Yes | 33.0 | 1.0 |
| MSP0608 | haib18CEM5453 | HNHKFCCXY_SL345930.3   | 68886 | no  | No  |                 |                                    |                                                                            | virulent/lytic               | Yes | 20.0 | 0.0 |
| MSP0609 | haib17CEM5106 | HCY5JCCXY_SL269600.74  | 68758 | no  | Yes |                 |                                    |                                                                            | prophage/temperate/lysogenic | Yes | 21.0 | 0.0 |
| MSP0610 | haib17CEM4890 | HKC32ALXX_SL254706.209 | 68672 | no  | Yes |                 |                                    |                                                                            | prophage/temperate/lysogenic | Yes | 13.0 | 0.0 |
| MSP0611 | haib17CEM5106 | HCY5HCCXY_SL270934.71  | 68660 | no  | Yes |                 |                                    |                                                                            | prophage/temperate/lysogenic | Yes | 31.0 | 0.0 |
| MSP0612 | haib18CEM5332 | HK7G5CCXY_SL311017.28  | 68619 | no  | Yes |                 |                                    |                                                                            | prophage/temperate/lysogenic | Yes | 33.0 | 0.0 |
| MSP0613 | haib17KIU4866 | HMC MJCCXY_SL335947.77 | 68603 | no  | Yes |                 |                                    |                                                                            | prophage/temperate/lysogenic | Yes | 32.0 | 0.0 |
| MSP0614 | haib17CEM4890 | H2NYMCCXY_SL254856.46  | 68600 | no  | Yes |                 |                                    | <i>Serratia plymuthica</i> AS9                                             | virulent/lytic               | Yes | 32.0 | 0.0 |
| MSP0615 | haib17KIU4866 | H7HJMCCXY_SL272776.85  | 68576 | no  | Yes |                 |                                    |                                                                            | prophage/temperate/lysogenic | Yes | 30.0 | 0.0 |
| MSP0616 | haib17CEM4890 | H2NYMCCXY_SL254790.67  | 68572 | yes | No  |                 |                                    |                                                                            | virulent/lytic               | Yes | 29.0 | 0.0 |
| MSP0617 | haib17CEM4890 | HKC32ALXX_SL254705.205 | 68383 | no  | Yes |                 |                                    |                                                                            | prophage/temperate/lysogenic | Yes | 16.0 | 0.0 |
| MSP0618 | haib17CEM4890 | H2NYMCCXY_SL254772.236 | 68364 | no  | Yes |                 |                                    |                                                                            | prophage/temperate/lysogenic | Yes | 11.0 | 0.0 |
| MSP0619 | haib17CEM4890 | H2NYMCCXY_SL254784.301 | 68312 | no  | Yes |                 |                                    | <i>Acinetobacter radioresistens</i>                                        | prophage/temperate/lysogenic | Yes | 32.0 | 0.0 |
| MSP0621 | haib17CEM4890 | H2NYMCCXY_SL254861.30  | 68243 | no  | No  |                 |                                    |                                                                            | prophage/temperate/lysogenic | Yes | 10.0 | 0.0 |
| MSP0623 | haib17CEM5106 | HCY5HCCXY_SL270914.63  | 68009 | no  | Yes |                 |                                    | <i>Pseudomonas stutzeri</i> A1501                                          | prophage/temperate/lysogenic | Yes | 31.0 | 0.0 |
| MSP0624 | haib17KIU4866 | H7HJMCCXY_SL272790.9   | 67988 | no  | Yes |                 |                                    |                                                                            | prophage/temperate/lysogenic | No  | 30.0 | 1.0 |
| MSP0625 | haib17CEM4890 | H2NYMCCXY_SL254772.237 | 67943 | no  | Yes |                 |                                    |                                                                            | prophage/temperate/lysogenic | Yes | 12.0 | 0.0 |
| MSP0626 | haib17KIU4866 | H7HJMCCXY_SL272776.86  | 67908 | no  | Yes |                 |                                    |                                                                            | prophage/temperate/lysogenic | Yes | 5.0  | 0.0 |
| MSP0627 | haib17CEM5106 | HCV72CCXY_SL269748.219 | 67886 | no  | Yes |                 |                                    | <i>Cronobacter sakazakii</i>                                               | prophage/temperate/lysogenic | Yes | 28.0 | 0.0 |
| MSP0628 | haib17CEM4890 | H2NYMCCXY_SL254769.187 | 67837 | no  | Yes |                 |                                    |                                                                            | virulent/lytic               | Yes | 30.0 | 0.0 |
| MSP0629 | haib17CEM4890 | H2NYMCCXY_SL254825.12  | 67769 | no  | No  |                 |                                    |                                                                            | virulent/lytic               | Yes | 22.0 | 0.0 |
| MSP0630 | haib17CEM5106 | HCVMTCCXY_SL269598.83  | 67764 | no  | Yes |                 |                                    |                                                                            | prophage/temperate/lysogenic | Yes | 14.0 | 0.0 |
| MSP0632 | haib17CEM5106 | HCV72CCXY_SL269786.214 | 67699 | no  | Yes |                 |                                    | <i>Aeromonas veronii</i>                                                   | prophage/temperate/lysogenic | Yes | 22.0 | 0.0 |
| MSP0633 | haib17CEM5106 | HCV72CCXY_SL269752.122 | 67691 | no  | Yes |                 |                                    | <i>Propionibacterium freudenreichii</i>                                    | prophage/temperate/lysogenic | Yes | 32.0 | 0.0 |
| MSP0634 | haib17CEM5106 | HCY5HCCXY_SL270942.66  | 67590 | no  | Yes |                 |                                    |                                                                            | prophage/temperate/lysogenic | Yes | 30.0 | 0.0 |
| MSP0635 | haib17KIU4866 | H7HJMCCXY_SL272765.47  | 67322 | yes | No  |                 |                                    |                                                                            | prophage/temperate/lysogenic | Yes | 8.0  | 0.0 |
| MSP0636 | haib18CEM5453 | HMGW3CCXY_SL342525.1   | 67232 | yes | No  |                 |                                    |                                                                            | virulent/lytic               | Yes | 5.0  | 0.0 |
| MSP0637 | haib17CEM4890 | H2NYMCCXY_SL254788.51  | 67224 | no  | Yes |                 |                                    |                                                                            | prophage/temperate/lysogenic | Yes | 30.0 | 0.0 |
| MSP0638 | haib17CEM5106 | HCV72CCXY_SL269800.44  | 67217 | no  | Yes |                 |                                    | <i>Clostridium perfringens</i>                                             | prophage/temperate/lysogenic | Yes | 20.0 | 0.0 |
| MSP0639 | haib17KIU4866 | H7HJMCCXY_SL272775.34  | 67071 | no  | Yes |                 |                                    | <i>Salmonella enterica</i> subsp. <i>enterica</i> serovar <i>Tennessee</i> | prophage/temperate/lysogenic | Yes | 29.0 | 1.0 |
| MSP0640 | haib17KIU4866 | H7HJMCCXY_SL272801.3   | 67070 | no  | No  |                 |                                    |                                                                            | prophage/temperate/lysogenic | Yes | 12.0 | 0.0 |
| MSP0642 | haib17CEM4890 | HMC MJCCXY_SL335795.37 | 66728 | no  | Yes |                 |                                    | <i>Pseudomonas pseudoalcaligenes</i> CECT 5344                             | virulent/lytic               | Yes | 33.0 | 0.0 |
| MSP0643 | haib17CEM4890 | H75CGCCXY_SL263649.79  | 66637 | no  | Yes |                 |                                    | <i>Dickeya</i> sp. CSL RW240                                               | prophage/temperate/lysogenic | Yes | 26.0 | 0.0 |
| MSP0644 | haib17CEM4890 | H2NYMCCXY_SL254794.405 | 66605 | no  | Yes |                 |                                    |                                                                            | prophage/temperate/lysogenic | Yes | 24.0 | 0.0 |
| MSP0645 | haib17CEM4890 | H7KYMCCXY_SL273103.72  | 66585 | no  | No  |                 |                                    |                                                                            | virulent/lytic               | Yes | 22.0 | 0.0 |
| MSP0646 | haib17CEM4890 | H2NYMCCXY_SL254831.235 | 66515 | no  | Yes |                 |                                    |                                                                            | prophage/temperate/lysogenic | Yes | 15.0 | 0.0 |
| MSP0647 | haib17KIU4866 | HMC MJCCXY_SL335956.83 | 66503 | no  | Yes |                 |                                    |                                                                            | prophage/temperate/lysogenic | Yes | 17.0 | 0.0 |
| MSP0648 | haib17CEM4890 | HKC32ALXX_SL254739.7   | 66480 | no  | No  | Corynebacterium | <i>Corynebacterium vitauerumis</i> |                                                                            | virulent/lytic               | Yes | 27.0 | 0.0 |
| MSP0650 | haib17CEM4890 | H75CGCCXY_SL263665.48  | 66410 | no  | Yes |                 |                                    | <i>Acinetobacter indicus</i>                                               | prophage/temperate/lysogenic | Yes | 32.0 | 0.0 |
| MSP0651 | haib17CEM4890 | H2NYMCCXY_SL254771.196 | 66396 | no  | Yes |                 |                                    | <i>Acinetobacter</i> sp. <i>WCHA45</i>                                     | prophage/temperate/lysogenic | Yes | 32.0 | 0.0 |
| MSP0652 | haib17CEM4890 | H2NYMCCXY_SL254855.190 | 66366 | no  | Yes |                 |                                    |                                                                            | prophage/temperate/lysogenic | Yes | 29.0 | 0.0 |
| MSP0653 | haib17CEM5106 | HCV72CCXY_SL269799.36  | 66336 | no  | Yes |                 |                                    |                                                                            | prophage/temperate/lysogenic | Yes | 28.0 | 0.0 |
| MSP0654 | haib17CEM5106 | HCV72CCXY_SL269759.20  | 66325 | no  | Yes |                 |                                    |                                                                            | virulent/lytic               | Yes | 27.0 | 0.0 |
| MSP0655 | haib18CEM5332 | HMC MJCCXY_SL335770.26 | 66257 | no  | No  | Corynebacterium | <i>Corynebacterium vitauerumis</i> |                                                                            | virulent/lytic               | Yes | 21.0 | 0.0 |
| MSP0656 | haib17DB4959  | H3MGVCCXY_SL259987.17  | 66247 | no  | Yes | Staphylococcus  | <i>Staphylococcus aureus</i>       | Bacillus halodurans C-125                                                  | prophage/temperate/lysogenic | No  | 32.0 | 0.0 |
| MSP0657 | haib17KIU4866 | H7HJMCCXY_SL272768.40  | 66207 | no  | No  |                 |                                    |                                                                            | virulent/lytic               | Yes | 12.0 | 0.0 |
| MSP0658 | haib17CEM4890 | H2NYMCCXY_SL254818.216 | 66172 | no  | No  |                 |                                    |                                                                            | virulent/lytic               | Yes | 11.0 | 0.0 |
| MSP0659 | haib17CEM4890 | H2NYMCCXY_SL254805.219 | 66102 | no  | Yes |                 |                                    |                                                                            | prophage/temperate/lysogenic | Yes | 32.0 | 0.0 |
| MSP0660 | haib17CEM5106 | HCVMTCCXY_SL269541.31  | 66099 | no  | Yes |                 |                                    |                                                                            | prophage/temperate/lysogenic | Yes | 33.0 | 0.0 |
| MSP0661 | haib18CEM5453 | HNHKFCCXY_SL346109.10  | 66094 | no  | No  |                 |                                    |                                                                            | virulent/lytic               | Yes | 19.0 | 0.0 |
| MSP0662 | haib17CEM5106 | HCV72CCXY_SL269783.52  | 66083 | no  | Yes | Arthrobacter    | <i>Arthrobacter globiformis</i>    |                                                                            | prophage/temperate/lysogenic | Yes | 32.0 | 0.0 |
| MSP0663 | haib17CEM4890 | H2NYMCCXY_SL254818.217 | 65991 | no  | No  |                 |                                    |                                                                            | prophage/temperate/lysogenic | Yes | 33.0 | 0.0 |
| MSP0664 | haib17CEM4890 | HKC32ALXX_SL254752.106 | 65954 | no  | No  |                 |                                    | <i>Candidatus Tenderia electrophaga</i>                                    | prophage/temperate/lysogenic | Yes | 16.0 | 0.0 |

Table S1

|         |                                      |       |     |     |                |                         |                                                      |                              |     |      |     |
|---------|--------------------------------------|-------|-----|-----|----------------|-------------------------|------------------------------------------------------|------------------------------|-----|------|-----|
| MSP0665 | haib17CEM5106_HCV72CCXY_SL269744.158 | 65953 | no  | Yes |                |                         |                                                      | prophage/temperate/lysogenic | Yes | 29.0 | 0.0 |
| MSP0666 | haib17CEM4890_H7KYMCCXY_SL273060.34  | 65951 | no  | No  | Microbacterium | Microbacterium_foliorum |                                                      | virulent/lytic               | No  | 21.0 | 0.0 |
| MSP0667 | haib17CEM4890_H2NYMCCXY_SL254856.49  | 65933 | no  | No  |                |                         | Acinetobacter junii                                  | prophage/temperate/lysogenic | Yes | 25.0 | 1.0 |
| MSP0668 | haib17CEM4890_H75CGCCXY_SL263699.79  | 65924 | no  | Yes |                |                         |                                                      | prophage/temperate/lysogenic | Yes | 10.0 | 0.0 |
| MSP0669 | haib17CEM5106_HCV72CCXY_SL269788.197 | 65865 | no  | Yes |                |                         | Corynebacterium flavescens                           | virulent/lytic               | Yes | 28.0 | 0.0 |
| MSP0670 | haib17CEM4890_HKC32ALXX_SL254681.232 | 65851 | no  | Yes |                |                         |                                                      | prophage/temperate/lysogenic | Yes | 13.0 | 0.0 |
| MSP0672 | haib17CEM4890_H2NYMCCXY_SL254770.165 | 65695 | no  | Yes |                |                         |                                                      | prophage/temperate/lysogenic | Yes | 11.0 | 0.0 |
| MSP0673 | haib17CEM4890_HKC32ALXX_SL254681.233 | 65691 | no  | Yes |                |                         | Clostridium sp. JN-9                                 | prophage/temperate/lysogenic | Yes | 15.0 | 0.0 |
| MSP0674 | haib17CEM5106_HCY5HCCXY_SL270978.100 | 65610 | no  | Yes |                |                         |                                                      | prophage/temperate/lysogenic | Yes | 28.0 | 0.0 |
| MSP0675 | haib17CEM4890_HKC32ALXX_SL254681.234 | 65548 | no  | Yes |                |                         |                                                      | prophage/temperate/lysogenic | Yes | 21.0 | 0.0 |
| MSP0676 | haib17CEM5106_HCY5JCCXY_SL269595.66  | 65527 | no  | No  |                |                         |                                                      | virulent/lytic               | Yes | 21.0 | 0.0 |
| MSP0677 | haib17CEM4890_H2NYMCCXY_SL254809.7   | 65481 | no  | No  |                |                         |                                                      | virulent/lytic               | Yes | 18.0 | 0.0 |
| MSP0678 | haib17CEM4890_H2NYMCCXY_SL254782.190 | 65386 | no  | Yes |                |                         |                                                      | prophage/temperate/lysogenic | Yes | 17.0 | 0.0 |
| MSP0680 | haib17CEM5106_HCV72CCXY_SL269777.133 | 65324 | no  | Yes |                |                         |                                                      | prophage/temperate/lysogenic | Yes | 14.0 | 0.0 |
| MSP0681 | haib17CEM4890_HKC32ALXX_SL254706.226 | 65317 | no  | Yes | Cronobacter    | Cronobacter_sakazakii   | Serratia plymuthica AS9                              | prophage/temperate/lysogenic | No  | 25.0 | 0.0 |
| MSP0682 | haib17CEM4890_H2NYMCCXY_SL254772.258 | 65297 | no  | No  |                |                         |                                                      | virulent/lytic               | Yes | 6.0  | 0.0 |
| MSP0683 | haib17DB4959_H3MGVCCXY_SL259882.38   | 65296 | no  | Yes |                |                         | Blastochloris viridis                                | prophage/temperate/lysogenic | Yes | 5.0  | 0.0 |
| MSP0684 | haib17CEM4890_H75CGCCXY_SL263723.3   | 65122 | no  | Yes |                |                         |                                                      | prophage/temperate/lysogenic | Yes | 21.0 | 0.0 |
| MSP0685 | haib17KIU4866_H7HJMCCXY_SL272751.61  | 65102 | no  | Yes |                |                         |                                                      | prophage/temperate/lysogenic | Yes | 13.0 | 0.0 |
| MSP0686 | haib18CEM5332_HMCMJCCXY_SL335741.10  | 64960 | no  | Yes |                |                         |                                                      | prophage/temperate/lysogenic | Yes | 32.0 | 0.0 |
| MSP0687 | haib17CEM4890_H75CGCCXY_SL263675.83  | 64942 | no  | Yes |                |                         |                                                      | prophage/temperate/lysogenic | Yes | 32.0 | 0.0 |
| MSP0688 | haib17CEM4890_H2NYMCCXY_SL254772.260 | 64864 | no  | Yes |                |                         |                                                      | virulent/lytic               | Yes | 15.0 | 0.0 |
| MSP0689 | haib17KIU4866_HMCMJCCXY_SL335946.29  | 64802 | no  | Yes |                |                         | Salmonella enterica subsp. enterica serovar Waycross | prophage/temperate/lysogenic | Yes | 27.0 | 1.0 |
| MSP0690 | haib17CEM4890_H2NYMCCXY_SL254772.261 | 64669 | no  | No  |                |                         |                                                      | virulent/lytic               | Yes | 12.0 | 0.0 |
| MSP0691 | haib17CEM4890_H2NYMCCXY_SL254850.49  | 64646 | no  | No  |                |                         |                                                      | virulent/lytic               | Yes | 33.0 | 0.0 |
| MSP0692 | haib17CEM4890_HKC32ALXX_SL254681.236 | 64630 | no  | No  |                |                         |                                                      | prophage/temperate/lysogenic | Yes | 8.0  | 0.0 |
| MSP0693 | haib17KIU4866_H7HJMCCXY_SL272802.18  | 64584 | no  | Yes |                |                         |                                                      | prophage/temperate/lysogenic | Yes | 32.0 | 0.0 |
| MSP0694 | haib17CEM4890_H3HKWHCCXY_SL263333.1  | 64479 | yes | No  |                |                         | Leptolyngbya sp. O-77                                | virulent/lytic               | Yes | 13.0 | 0.0 |
| MSP0695 | haib17KIU4866_HMCMJCCXY_SL335952.37  | 64445 | no  | Yes |                |                         | Acinetobacter sp. ACN1H1                             | prophage/temperate/lysogenic | Yes | 31.0 | 0.0 |
| MSP0696 | haib17CEM4890_H2NYMCCXY_SL254806.221 | 64432 | yes | No  |                |                         | Aromatoleum aromaticum EbN1                          | prophage/temperate/lysogenic | Yes | 16.0 | 0.0 |
| MSP0697 | haib17CEM4890_H75CGCCXY_SL263677.58  | 64363 | no  | Yes |                |                         |                                                      | prophage/temperate/lysogenic | Yes | 30.0 | 0.0 |
| MSP0698 | haib17CEM4890_HKC32ALXX_SL254728.234 | 64340 | yes | No  |                |                         |                                                      | prophage/temperate/lysogenic | Yes | 8.0  | 0.0 |
| MSP0699 | haib17CEM5106_HCY5HCCXY_SL270943.26  | 64300 | no  | Yes |                |                         |                                                      | virulent/lytic               | Yes | 29.0 | 0.0 |
| MSP0700 | haib17CEM5106_HCVMTCCXY_SL269600.77  | 64232 | no  | Yes |                |                         | Alkalihalobacillus clausii                           | prophage/temperate/lysogenic | Yes | 14.0 | 0.0 |
| MSP0701 | haib17CEM4890_H2NYMCCXY_SL254848.44  | 64158 | yes | No  |                |                         |                                                      | virulent/lytic               | Yes | 6.0  | 0.0 |
| MSP0702 | haib18CEM5453_H75YVCCXY_SL357286.3   | 64127 | no  | No  |                |                         |                                                      | virulent/lytic               | Yes | 16.0 | 0.0 |
| MSP0703 | haib17CEM5106_HCV72CCXY_SL269748.230 | 64103 | no  | Yes |                |                         |                                                      | prophage/temperate/lysogenic | Yes | 10.0 | 0.0 |
| MSP0704 | haib17CEM5106_HCVMTCCXY_SL269588.29  | 64089 | no  | Yes |                |                         |                                                      | prophage/temperate/lysogenic | Yes | 28.0 | 0.0 |
| MSP0705 | haib17CEM4890_HKC32ALXX_SL254764.216 | 63871 | yes | No  |                |                         |                                                      | prophage/temperate/lysogenic | Yes | 8.0  | 0.0 |
| MSP0706 | haib18CEM5453_HNGH3CCXY_SL344536.1   | 63847 | no  | No  |                |                         |                                                      | virulent/lytic               | Yes | 32.0 | 0.0 |
| MSP0707 | haib17CEM4890_H75CGCCXY_SL263654.60  | 63836 | no  | Yes |                |                         | Citrobacter rodentium ICC168                         | prophage/temperate/lysogenic | Yes | 30.0 | 0.0 |
| MSP0708 | haib17KIU4866_H7HJMCCXY_SL272826.119 | 63742 | no  | Yes |                |                         | Pigmentiphaga sp. H8                                 | prophage/temperate/lysogenic | Yes | 31.0 | 0.0 |
| MSP0709 | haib17CEM5106_HCVMTCCXY_SL269609.72  | 63739 | no  | Yes |                |                         | Enterococcus faecalis                                | prophage/temperate/lysogenic | No  | 32.0 | 1.0 |
| MSP0711 | haib17CEM4890_H2NYMCCXY_SL254796.185 | 63695 | no  | Yes |                |                         |                                                      | prophage/temperate/lysogenic | Yes | 28.0 | 0.0 |
| MSP0710 | haib17CEM4890_H2NYMCCXY_SL254829.199 | 63695 | no  | Yes |                |                         | Pseudomonas stutzeri                                 | virulent/lytic               | Yes | 33.0 | 1.0 |
| MSP0712 | haib17CEM4890_HKC32ALXX_SL254712.14  | 63690 | yes | No  |                |                         | Granulibacter bethedensis                            | prophage/temperate/lysogenic | Yes | 16.0 | 0.0 |
| MSP0713 | haib17KIU4866_HMCMJCCXY_SL335961.8   | 63684 | no  | Yes |                |                         | Acinetobacter sp. LoGeW2-3                           | prophage/temperate/lysogenic | Yes | 25.0 | 0.0 |
| MSP0714 | haib17CEM4890_H2NYMCCXY_SL254806.230 | 63664 | no  | No  | Bacillus       | Bacillus_cereus         |                                                      | prophage/temperate/lysogenic | Yes | 10.0 | 0.0 |
| MSP0715 | haib17KIU4866_H7HJMCCXY_SL272820.19  | 63613 | yes | No  |                |                         |                                                      | prophage/temperate/lysogenic | Yes | 10.0 | 0.0 |
| MSP0716 | haib17KIU4866_HMCMJCCXY_SL335942.37  | 63544 | no  | Yes |                |                         |                                                      | virulent/lytic               | Yes | 24.0 | 0.0 |
| MSP0717 | haib18CEM5453_HMGNSCCXY_SL344674.1   | 63542 | no  | No  |                |                         |                                                      | virulent/lytic               | Yes | 21.0 | 0.0 |
| MSP0718 | haib18CEM5453_HMC2KCCXY_SL336755.37  | 63518 | no  | No  |                |                         |                                                      | virulent/lytic               | Yes | 16.0 | 0.0 |
| MSP0719 | haib17CEM5106_HCY5HCCXY_SL270938.86  | 63515 | no  | Yes |                |                         |                                                      | prophage/temperate/lysogenic | Yes | 30.0 | 0.0 |
| MSP0720 | haib17CEM4890_H2NYMCCXY_SL254854.137 | 63395 | no  | No  |                |                         |                                                      | prophage/temperate/lysogenic | Yes | 7.0  | 0.0 |
| MSP0721 | haib17CEM5106_HCY5HCCXY_SL271123.34  | 63352 | no  | Yes |                |                         |                                                      | prophage/temperate/lysogenic | Yes | 22.0 | 0.0 |
| MSP0722 | haib17CEM4890_H2NYMCCXY_SL254796.186 | 63321 | no  | Yes |                |                         |                                                      | prophage/temperate/lysogenic | Yes | 9.0  | 0.0 |
| MSP0723 | haib17CEM4890_HKC32ALXX_SL254706.241 | 63274 | no  | No  |                |                         |                                                      | prophage/temperate/lysogenic | Yes | 13.0 | 0.0 |
| MSP0724 | haib17CEM4890_H75CGCCXY_SL263666.60  | 63248 | no  | Yes |                |                         | Acinetobacter baumannii                              | prophage/temperate/lysogenic | Yes | 30.0 | 1.0 |
| MSP0726 | haib17CEM4890_H75CGCCXY_SL263678.75  | 63171 | no  | Yes |                |                         | Acinetobacter baumannii                              | prophage/temperate/lysogenic | Yes | 24.0 | 1.0 |
| MSP0727 | haib17CEM5106_HCV72CCXY_SL269719.70  | 63169 | no  | Yes |                |                         | Klebsiella sp. M51                                   | prophage/temperate/lysogenic | No  | 30.0 | 0.0 |
| MSP0728 | haib17CEM5106_HCV72CCXY_SL269744.161 | 63097 | no  | No  |                |                         |                                                      | virulent/lytic               | Yes | 33.0 | 0.0 |
| MSP0729 | haib17KIU4866_H7HJMCCXY_SL272772.30  | 63032 | yes | No  |                |                         | Pseudomonas balearica DSM 6083                       | prophage/temperate/lysogenic | Yes | 20.0 | 1.0 |
| MSP0730 | haib17CEM4890_HKC32ALXX_SL254681.244 | 63007 | no  | Yes |                |                         |                                                      | prophage/temperate/lysogenic | Yes | 19.0 | 0.0 |
| MSP0731 | haib17CEM4890_H2NYMCCXY_SL254771.211 | 62914 | no  | No  |                |                         |                                                      | prophage/temperate/lysogenic | Yes | 16.0 | 0.0 |
| MSP0732 | haib17DB4959_H3MGVCCXY_SL259846.1    | 62893 | no  | No  |                |                         | Xanthomonas campestris pv. raphani 756C              | virulent/lytic               | Yes | 25.0 | 1.0 |
| MSP0734 | haib17CEM5241_HMGMHCCXY_SL343483.1   | 62834 | no  | Yes |                |                         | Moraxella osloensis                                  | prophage/temperate/lysogenic | Yes | 31.0 | 1.0 |
| MSP0735 | haib17KIU4866_H7HJMCCXY_SL272744.45  | 62825 | yes | No  |                |                         | Pseudomonas balearica DSM 6083                       | prophage/temperate/lysogenic | Yes | 16.0 | 1.0 |
| MSP0736 | haib17CEM4890_H2NYMCCXY_SL254861.36  | 62823 | no  | Yes |                |                         | Kosakonia cowanii JCM 10956 = DSM 18146              | prophage/temperate/lysogenic | Yes | 30.0 | 0.0 |

Table S1

|         |                                      |       |     |     |                  |                              |                                                      |                              |     |      |     |
|---------|--------------------------------------|-------|-----|-----|------------------|------------------------------|------------------------------------------------------|------------------------------|-----|------|-----|
| MSP0737 | haib17CEM4890_HKC32ALXX_SL254706.246 | 62737 | no  | Yes | Acinetobacter    | Acinetobacter_baumanni       | Acinetobacter_baumanni                               | prophage/temperate/lysogenic | No  | 31.0 | 1.0 |
| MSP0738 | haib17CEM5241_HMGMHCCXY_SL343449.4   | 62706 | no  | No  |                  |                              |                                                      | virulent/lytic               | Yes | 21.0 | 0.0 |
| MSP0739 | haib17KIU4866_H7HJMCCXY_SL272755.20  | 62645 | no  | Yes |                  |                              |                                                      | prophage/temperate/lysogenic | Yes | 13.0 | 0.0 |
| MSP0740 | haib17CEM4890_H2NYMCCXY_SL254783.283 | 62621 | yes | No  |                  |                              | Raoultella_planticola                                | prophage/temperate/lysogenic | Yes | 10.0 | 0.0 |
| MSP0742 | haib18CEM5453_HMGTCJCCXY_SL342608.26 | 62609 | no  | Yes |                  |                              |                                                      | prophage/temperate/lysogenic | Yes | 32.0 | 0.0 |
| MSP0743 | haib17CEM5106_HCY5HCCXY_SL270936.96  | 62588 | no  | Yes |                  |                              | Desulfovibrio_magneticus_RS-1                        | prophage/temperate/lysogenic | Yes | 27.0 | 0.0 |
| MSP0744 | haib17CEM5106_HCV72CCXY_SL269718.98  | 62584 | no  | Yes |                  |                              | Enterococcus_cecorum                                 | prophage/temperate/lysogenic | No  | 22.0 | 0.0 |
| MSP0745 | haib17CEM4890_H2NYMCCXY_SL254830.241 | 62561 | no  | Yes |                  |                              | Dickeya_zeae_NCPPB_3531                              | prophage/temperate/lysogenic | No  | 26.0 | 0.0 |
| MSP0746 | haib17CEM5106_HCVMTCCXY_SL269598.95  | 62545 | no  | No  | Arthrobacter     | Arthrobacter_globiformis     |                                                      | prophage/temperate/lysogenic | Yes | 32.0 | 0.0 |
| MSP0747 | haib18CEM5453_HNHKFCXY_SL345969.1    | 62532 | no  | No  | Arthrobacter     | None                         |                                                      | virulent/lytic               | Yes | 28.0 | 0.0 |
| MSP0748 | haib17KIU4866_HMCMJCCXY_SL335960.40  | 62522 | no  | Yes |                  |                              | Acinetobacter_sp._ACNIH1                             | prophage/temperate/lysogenic | Yes | 32.0 | 0.0 |
| MSP0749 | haib17CEM4890_H2NYMCCXY_SL254829.205 | 62514 | no  | Yes |                  |                              |                                                      | prophage/temperate/lysogenic | No  | 33.0 | 0.0 |
| MSP0750 | haib17DB4959_H3MGVCCXY_SL259963.112  | 62471 | no  | Yes |                  |                              | Escherichia_coli_ED1a                                | prophage/temperate/lysogenic | Yes | 31.0 | 1.0 |
| MSP0751 | haib17CEM4890_H2NYMCCXY_SL254793.122 | 62463 | no  | Yes |                  |                              | Enterobacter_cloacae                                 | virulent/lytic               | No  | 26.0 | 0.0 |
| MSP0753 | haib17CEM4890_H2NYMCCXY_SL254856.50  | 62430 | no  | Yes |                  |                              | Xenorhabdus_doucetiae                                | prophage/temperate/lysogenic | Yes | 29.0 | 0.0 |
| MSP0754 | haib17CEM4890_HKC32ALXX_SL254764.222 | 62398 | no  | Yes |                  |                              |                                                      | virulent/lytic               | Yes | 15.0 | 0.0 |
| MSP0755 | haib17CEM4890_H2NYMCCXY_SL254770.177 | 62356 | no  | No  |                  |                              |                                                      | prophage/temperate/lysogenic | Yes | 12.0 | 0.0 |
| MSP0756 | haib17KIU4866_H7HJMCCXY_SL272816.88  | 62323 | no  | Yes |                  |                              |                                                      | prophage/temperate/lysogenic | Yes | 29.0 | 0.0 |
| MSP0757 | haib17CEM4890_HKC32ALXX_SL254679.27  | 62285 | no  | Yes |                  |                              |                                                      | prophage/temperate/lysogenic | Yes | 22.0 | 0.0 |
| MSP0758 | haib17CEM5106_HCY5JCCXY_SL269564.35  | 62198 | no  | Yes |                  |                              | Aeribacillus_pallidus                                | prophage/temperate/lysogenic | Yes | 31.0 | 0.0 |
| MSP0759 | haib17CEM5106_HCY5JCCXY_SL269535.139 | 62183 | no  | Yes | Lactococcus      | Lactococcus_lactis           | Streptococcus_thermophilus                           | prophage/temperate/lysogenic | No  | 29.0 | 0.0 |
| MSP0760 | haib18CEM5453_HMCMJCCXY_SL336225.21  | 62155 | no  | Yes |                  |                              | Proteus_mirabilis                                    | prophage/temperate/lysogenic | Yes | 26.0 | 0.0 |
| MSP0761 | haib17CEM5106_HCV72CCXY_SL269759.25  | 62067 | no  | Yes |                  |                              |                                                      | prophage/temperate/lysogenic | Yes | 30.0 | 0.0 |
| MSP0762 | haib17CEM5106_HCV72CCXY_SL269751.72  | 61992 | no  | Yes |                  |                              |                                                      | virulent/lytic               | Yes | 22.0 | 0.0 |
| MSP0763 | haib17CEM5106_HCV72CCXY_SL269784.57  | 61915 | no  | Yes |                  |                              |                                                      | virulent/lytic               | Yes | 32.0 | 0.0 |
| MSP0764 | haib17KIU4866_H7HJMCCXY_SL272746.36  | 61908 | no  | No  | Proteus          | Proteus_mirabilis            | Klebsiella_pneumoniae_subsp._pneumoniae              | virulent/lytic               | Yes | 32.0 | 0.0 |
| MSP0765 | haib17CEM5106_HCY5HCCXY_SL270914.72  | 61888 | no  | Yes |                  |                              |                                                      | prophage/temperate/lysogenic | Yes | 33.0 | 0.0 |
| MSP0766 | haib17CEM4890_H2NYMCCXY_SL254783.290 | 61868 | no  | Yes |                  |                              | Citrobacter_koseri                                   | prophage/temperate/lysogenic | Yes | 26.0 | 0.0 |
| MSP0767 | haib17CEM4890_H2NYMCCXY_SL254776.80  | 61860 | no  | No  | Bacillus         | Bacillus_cereus              | Bacillus_cereus_AH1271                               | prophage/temperate/lysogenic | Yes | 12.0 | 0.0 |
| MSP0768 | haib17CEM5106_HCV72CCXY_SL269744.166 | 61850 | no  | Yes |                  |                              |                                                      | virulent/lytic               | Yes | 28.0 | 0.0 |
| MSP0769 | haib17CEM4890_HKC32ALXX_SL254750.6   | 61778 | no  | No  | Ruegeria         | Ruegeria_pomeroyi            | Paracoccus_contaminans                               | virulent/lytic               | Yes | 10.0 | 0.0 |
| MSP0771 | haib17CEM4890_H75CGCCXY_SL263654.65  | 61749 | no  | Yes |                  |                              | Ruminococcus_bircirculans                            | virulent/lytic               | Yes | 33.0 | 0.0 |
| MSP0772 | haib17CEM5106_HCVMTCCXY_SL269601.70  | 61748 | no  | Yes | Lactococcus      | Lactococcus_lactis           | Streptococcus_thermophilus_TH1477                    | prophage/temperate/lysogenic | No  | 32.0 | 0.0 |
| MSP0774 | haib17CEM4890_H7KYMCCXY_SL273103.78  | 61672 | no  | Yes |                  |                              |                                                      | prophage/temperate/lysogenic | Yes | 11.0 | 0.0 |
| MSP0775 | haib17CEM5106_HCV72CCXY_SL269717.65  | 61671 | no  | Yes |                  |                              |                                                      | prophage/temperate/lysogenic | Yes | 24.0 | 0.0 |
| MSP0776 | haib18CEM5453_HMC2KCCXY_SL336638.1   | 61638 | no  | No  |                  |                              |                                                      | virulent/lytic               | Yes | 22.0 | 0.0 |
| MSP0777 | haib18CEM5453_HNH3CCXY_SL344549.13   | 61625 | no  | No  |                  |                              |                                                      | virulent/lytic               | Yes | 27.0 | 0.0 |
| MSP0779 | haib17CEM5106_HCV72CCXY_SL269762.43  | 61485 | no  | Yes |                  |                              |                                                      | prophage/temperate/lysogenic | Yes | 29.0 | 0.0 |
| MSP0781 | haib17CEM4890_H2NYMCCXY_SL254818.236 | 61447 | no  | No  |                  |                              | Desulfovibrio_desulfuricans_ND132                    | prophage/temperate/lysogenic | Yes | 14.0 | 0.0 |
| MSP0782 | haib18CEM5453_HMGW3CCXY_SL342337.1   | 61391 | no  | No  | Mycobacterium    | Mycobacterium_smegmatis      |                                                      | prophage/temperate/lysogenic | Yes | 33.0 | 0.0 |
| MSP0783 | haib17CEM4890_H2NYMCCXY_SL254783.295 | 61349 | no  | Yes |                  |                              |                                                      | prophage/temperate/lysogenic | Yes | 4.0  | 0.0 |
| MSP0784 | haib17CEM4890_H75CGCCXY_SL263652.171 | 61142 | no  | Yes |                  |                              | Citrobacter_koseri                                   | prophage/temperate/lysogenic | Yes | 30.0 | 0.0 |
| MSP0785 | haib17CEM4890_H2NYMCCXY_SL254839.37  | 61064 | no  | Yes |                  |                              |                                                      | prophage/temperate/lysogenic | Yes | 33.0 | 0.0 |
| MSP0786 | haib17KIU4866_HMCMJCCXY_SL335947.87  | 61050 | no  | Yes |                  |                              | Kosakonia_cowanii_JCM_10956_DSM_18146                | prophage/temperate/lysogenic | No  | 27.0 | 0.0 |
| MSP0787 | haib17CEM4890_H75CGCCXY_SL263652.172 | 60928 | no  | Yes |                  |                              |                                                      | prophage/temperate/lysogenic | Yes | 31.0 | 0.0 |
| MSP0788 | haib17KIU4866_H7HJMCCXY_SL272826.128 | 60888 | no  | Yes | Pseudomonas      | None                         | Pseudomonas_stutzeri_A1501                           | prophage/temperate/lysogenic | Yes | 32.0 | 0.0 |
| MSP0789 | haib17CEM4890_HKC32ALXX_SL254718.197 | 60885 | no  | Yes |                  |                              |                                                      | prophage/temperate/lysogenic | Yes | 14.0 | 0.0 |
| MSP0790 | haib17CEM4890_H2NYMCCXY_SL254829.217 | 60884 | no  | No  |                  |                              |                                                      | virulent/lytic               | Yes | 5.0  | 0.0 |
| MSP0791 | haib17CEM4890_H75CGCCXY_SL263678.76  | 60871 | no  | Yes |                  |                              | Leptothrix_choldonii_SP-6                            | prophage/temperate/lysogenic | Yes | 29.0 | 0.0 |
| MSP0792 | haib17CEM4890_H2NYMCCXY_SL254854.148 | 60793 | no  | Yes |                  |                              | Cellvibrio_japonicus_Ueda107                         | prophage/temperate/lysogenic | Yes | 29.0 | 0.0 |
| MSP0793 | haib17CEM4890_H2NYMCCXY_SL254805.231 | 60773 | no  | Yes | Stenotrophomonas | Stenotrophomonas_maltophilia |                                                      | prophage/temperate/lysogenic | Yes | 31.0 | 1.0 |
| MSP0794 | haib17CEM4890_HMCMJCCXY_SL335794.29  | 60764 | no  | Yes |                  |                              | Pseudomonas_sp._CMR12a                               | virulent/lytic               | Yes | 33.0 | 0.0 |
| MSP0795 | haib17CEM4890_H2NYMCCXY_SL254794.457 | 60746 | no  | Yes |                  |                              | Salmonella_enterica_subsp._enterica_serovar_Derby    | prophage/temperate/lysogenic | Yes | 20.0 | 1.0 |
| MSP0796 | haib17CEM4890_H2NYMCCXY_SL254783.307 | 60683 | no  | No  |                  |                              |                                                      | prophage/temperate/lysogenic | Yes | 22.0 | 0.0 |
| MSP0797 | haib17CEM5106_HCY5JCCXY_SL269598.77  | 60624 | no  | Yes |                  |                              |                                                      | prophage/temperate/lysogenic | Yes | 33.0 | 0.0 |
| MSP0798 | haib18CEM5453_HMGW3CCXY_SL342282.1   | 60560 | yes | No  |                  |                              |                                                      | virulent/lytic               | Yes | 20.0 | 0.0 |
| MSP0799 | haib17CEM5106_HCY5JCCXY_SL269536.75  | 60422 | no  | Yes |                  |                              |                                                      | prophage/temperate/lysogenic | Yes | 32.0 | 0.0 |
| MSP0800 | haib17CEM4890_HKC32ALXX_SL254706.261 | 60383 | no  | Yes |                  |                              | Pectobacterium_parmentieri                           | prophage/temperate/lysogenic | Yes | 16.0 | 0.0 |
| MSP0801 | haib17KIU4866_H7HJMCCXY_SL272816.97  | 60374 | no  | Yes |                  |                              |                                                      | prophage/temperate/lysogenic | Yes | 33.0 | 0.0 |
| MSP0803 | haib17CEM4890_H2NYMCCXY_SL254818.241 | 60332 | no  | Yes |                  |                              | Pluralibacter_gergoviae                              | virulent/lytic               | Yes | 24.0 | 0.0 |
| MSP0804 | haib17KIU4866_H7HJMCCXY_SL272814.49  | 60300 | no  | Yes |                  |                              |                                                      | prophage/temperate/lysogenic | Yes | 32.0 | 0.0 |
| MSP0805 | haib17CEM4890_H2NYMCCXY_SL254851.20  | 60294 | no  | Yes |                  |                              | Kosakonia_cowanii_JCM_10956_DSM_18146                | prophage/temperate/lysogenic | Yes | 28.0 | 0.0 |
| MSP0806 | haib17KIU4866_HMCMJCCXY_SL335963.50  | 60290 | no  | No  |                  |                              | Acinetobacter_junii                                  | prophage/temperate/lysogenic | Yes | 24.0 | 1.0 |
| MSP0807 | haib18CEM5453_HNHKFCXY_SL346109.13   | 60275 | no  | No  |                  |                              | Salmonella_enterica_subsp._enterica_serovar_Waycross | virulent/lytic               | Yes | 13.0 | 1.0 |
| MSP0808 | haib18CEM5453_HMC2KCCXY_SL336644.22  | 60248 | no  | No  |                  |                              |                                                      | virulent/lytic               | Yes | 30.0 | 0.0 |
| MSP0809 | haib17CEM4890_HKC32ALXX_SL254752.114 | 60232 | no  | Yes | Pseudomonas      | Pseudomonas_aeruginosa       | Pseudomonas_balearica_DSM_6083                       | prophage/temperate/lysogenic | Yes | 29.0 | 0.0 |
| MSP0810 | haib17CEM4890_H75CGCCXY_SL263714.80  | 60205 | no  | Yes |                  |                              |                                                      | prophage/temperate/lysogenic | Yes | 26.0 | 0.0 |
| MSP0812 | haib17CEM4890_H2NYMCCXY_SL254829.222 | 60168 | no  | Yes |                  |                              | Acinetobacter_bereziniae                             | virulent/lytic               | Yes | 23.0 | 0.0 |

Table S1

|         |                                      |       |     |     |                   |                                  |                                |                              |     |      |     |     |
|---------|--------------------------------------|-------|-----|-----|-------------------|----------------------------------|--------------------------------|------------------------------|-----|------|-----|-----|
| MSP0813 | haib17CEM4890_HKC32ALXX_SL254681.253 | 60132 | no  | Yes |                   |                                  |                                | prophage/temperate/lysogenic | Yes | 32.0 |     | 0.0 |
| MSP0814 | haib18CEM5453_HNHKFCXXY_SL346109.14  | 60079 | yes | No  |                   |                                  |                                | prophage/temperate/lysogenic | Yes | 17.0 |     | 0.0 |
| MSP0815 | haib17CEM5106_HCY5HCCXY_SL270908.30  | 60005 | no  | Yes |                   |                                  |                                | prophage/temperate/lysogenic | Yes | 21.0 |     | 0.0 |
| MSP0817 | haib17CEM4890_HMCMJCCXY_SL335774.26  | 59997 | no  | Yes |                   |                                  | Streptomyces sp. SM17          | prophage/temperate/lysogenic | Yes | 31.0 |     | 0.0 |
| MSP0818 | haib17CEM4890_H2NYMCCXY_SL254796.202 | 59995 | no  | Yes |                   |                                  | Serratia sp. FGI94             | prophage/temperate/lysogenic | Yes | 25.0 |     | 0.0 |
| MSP0819 | haib17KIU4866_H7HJMCCXY_SL272748.18  | 59936 | no  | No  |                   |                                  |                                | virulent/lytic               | Yes | 21.0 |     | 0.0 |
| MSP0820 | haib17CEM5106_HCCGHCCXY_SL270477.1   | 59922 | no  | No  |                   |                                  |                                | virulent/lytic               | No  | 16.0 |     | 0.0 |
| MSP0821 | haib18CEM5453_HMGW3CCXY_SL342278.5   | 59857 | no  | Yes |                   |                                  | Pseudomonas sp. S-6-2          | prophage/temperate/lysogenic | Yes | 21.0 |     | 0.0 |
| MSP0823 | haib17KIU4866_HMCMJCCXY_SL335963.52  | 59797 | no  | No  |                   |                                  | Ruminococcus bicirculans       | prophage/temperate/lysogenic | Yes | 32.0 |     | 0.0 |
| MSP0824 | haib17CEM5106_HCV72CCXY_SL269788.211 | 59787 | no  | Yes |                   |                                  | Corynebacterium striatum       | prophage/temperate/lysogenic | Yes | 26.0 |     | 0.0 |
| MSP0825 | haib17KIU4866_HMCMJCCXY_SL335935.27  | 59733 | yes | No  |                   |                                  |                                | virulent/lytic               | Yes | 18.0 |     | 0.0 |
| MSP0828 | haib17CEM5106_HCV72CCXY_SL269792.142 | 59661 | no  | Yes |                   |                                  |                                | prophage/temperate/lysogenic | Yes | 26.0 |     | 0.0 |
| MSP0827 | haib18CEM5453_HNHKFCXXY_SL345480.1   | 59661 | no  | No  | Gordonia          | Gordonia terrae                  |                                | virulent/lytic               | No  | 32.0 |     | 0.0 |
| MSP0829 | haib18CEM5453_HT5YVCCXY_SL357341.1   | 59655 | no  | No  |                   |                                  |                                | virulent/lytic               | Yes | 2.0  |     | 0.0 |
| MSP0831 | haib17CEM4890_H2NYMCCXY_SL254860.33  | 59577 | no  | Yes |                   |                                  |                                | prophage/temperate/lysogenic | Yes | 31.0 |     | 0.0 |
| MSP0832 | haib18CEM5453_HNHKFCXXY_SL345930.4   | 59568 | no  | No  |                   |                                  |                                | prophage/temperate/lysogenic | Yes | 21.0 |     | 0.0 |
| MSP0833 | haib17CEM4890_H2NYMCCXY_SL254807.171 | 59558 | no  | Yes |                   |                                  |                                | prophage/temperate/lysogenic | Yes | 11.0 |     | 0.0 |
| MSP0834 | haib17KIU4866_H7HJMCCXY_SL272809.21  | 59544 | no  | Yes |                   |                                  |                                | prophage/temperate/lysogenic | Yes | 31.0 |     | 0.0 |
| MSP0836 | haib17CEM4890_HKC32ALXX_SL254718.204 | 59494 | yes | No  |                   |                                  |                                | prophage/temperate/lysogenic | Yes | 11.0 |     | 0.0 |
| MSP0835 | haib17KIU4866_HMCMJCCXY_SL335949.89  | 59494 | no  | Yes |                   |                                  |                                | prophage/temperate/lysogenic | Yes | 31.0 |     | 0.0 |
| MSP0837 | haib17CEM5106_HCY5JCCXY_SL269538.191 | 59479 | no  | Yes | Propionibacterium | Propionibacterium freudenreichii |                                | prophage/temperate/lysogenic | Yes | 32.0 |     | 0.0 |
| MSP0838 | haib17DB4959_H3MGVCCXY_SL259990.14   | 59443 | no  | Yes |                   |                                  | Enterococcus faecalis DENG1    | prophage/temperate/lysogenic | No  | 25.0 | 1.0 | 0.0 |
| MSP0839 | haib17CEM4890_H2NYMCCXY_SL254843.364 | 59406 | no  | No  |                   |                                  |                                | prophage/temperate/lysogenic | Yes | 12.0 |     | 0.0 |
| MSP0840 | haib17CEM4890_HKC32ALXX_SL254742.249 | 59365 | yes | No  | Bacillus          | Bacillus cereus                  |                                | prophage/temperate/lysogenic | Yes | 10.0 |     | 0.0 |
| MSP0841 | haib17CEM4890_H75CGCCXY_SL263689.92  | 59361 | no  | Yes |                   |                                  |                                | prophage/temperate/lysogenic | Yes | 28.0 |     | 0.0 |
| MSP0842 | haib17CEM5241_HMGMHCCXY_SL343449.5   | 59347 | no  | No  |                   |                                  |                                | virulent/lytic               | Yes | 15.0 |     | 0.0 |
| MSP0843 | haib17CEM4890_HKC32ALXX_SL254763.83  | 59343 | no  | Yes | Bacillus          | Bacillus cereus                  |                                | prophage/temperate/lysogenic | Yes | 32.0 |     | 0.0 |
| MSP0844 | haib17CEM4890_HKC32ALXX_SL254728.266 | 59266 | no  | No  |                   |                                  |                                | prophage/temperate/lysogenic | Yes | 16.0 |     | 0.0 |
| MSP0845 | haib18CEM5453_HNHKFCXXY_SL345508.3   | 59217 | yes | No  |                   |                                  |                                | virulent/lytic               | Yes | 21.0 |     | 0.0 |
| MSP0846 | haib18CEM5453_HT5YVCCXY_SL357401.1   | 59104 | no  | No  |                   |                                  |                                | virulent/lytic               | Yes | 4.0  |     | 0.0 |
| MSP0847 | haib17DB4959_H3MGVCCXY_SL259857.1    | 58950 | no  | No  |                   |                                  |                                | virulent/lytic               | Yes | 16.0 |     | 0.0 |
| MSP0848 | haib17CEM4890_HKC32ALXX_SL254762.37  | 58862 | yes | No  |                   |                                  | Vitreoscilla filiformis        | virulent/lytic               | Yes | 11.0 |     | 0.0 |
| MSP0850 | haib17CEM5106_HCY5JCCXY_SL269526.68  | 58843 | no  | Yes |                   |                                  |                                | prophage/temperate/lysogenic | Yes | 33.0 |     | 0.0 |
| MSP0851 | haib17DB4959_H3MGVCCXY_SL259923.38   | 58796 | no  | No  |                   |                                  |                                | virulent/lytic               | Yes | 22.0 |     | 0.0 |
| MSP0852 | haib17CEM5106_HCY5HCCXY_SL270915.109 | 58793 | no  | Yes |                   |                                  |                                | prophage/temperate/lysogenic | Yes | 29.0 |     | 0.0 |
| MSP0853 | haib17CEM4890_H2NYMCCXY_SL254806.260 | 58682 | no  | Yes |                   |                                  |                                | prophage/temperate/lysogenic | Yes | 18.0 |     | 0.0 |
| MSP0854 | haib17CEM5106_HCVMTCCXY_SL269598.104 | 58674 | no  | Yes |                   |                                  |                                | virulent/lytic               | Yes | 14.0 |     | 0.0 |
| MSP0855 | haib17CEM5106_HCVMTCCXY_SL269582.57  | 58609 | no  | Yes | Propionibacterium | Propionibacterium freudenreichii |                                | prophage/temperate/lysogenic | Yes | 33.0 |     | 0.0 |
| MSP0856 | haib17CEM4890_H7KYMCCXY_SL273087.4   | 58565 | yes | No  | Microbacterium    | Microbacterium foliorum          |                                | virulent/lytic               | Yes | 10.0 |     | 0.0 |
| MSP0858 | haib17CEM4890_H2NYMCCXY_SL254809.10  | 58520 | no  | No  |                   |                                  |                                | virulent/lytic               | Yes | 21.0 |     | 0.0 |
| MSP0859 | haib17CEM5106_HCY5JCCXY_SL269561.83  | 58474 | no  | Yes |                   |                                  | Ruminococcus bicirculans       | virulent/lytic               | No  | 31.0 |     | 0.0 |
| MSP0860 | haib17CEM4890_H75CGCCXY_SL263689.93  | 58450 | no  | Yes |                   |                                  |                                | prophage/temperate/lysogenic | Yes | 26.0 |     | 0.0 |
| MSP0861 | haib17CEM4890_H2NYMCCXY_SL254772.302 | 58449 | no  | No  |                   |                                  |                                | prophage/temperate/lysogenic | Yes | 8.0  |     | 0.0 |
| MSP0862 | haib17CEM5106_HCY5HCCXY_SL270942.84  | 58445 | no  | Yes |                   |                                  | Pseudomonas sp. CMR12a         | prophage/temperate/lysogenic | Yes | 33.0 |     | 0.0 |
| MSP0863 | haib17CEM5106_HCY5JCCXY_SL269575.64  | 58390 | no  | No  |                   |                                  |                                | prophage/temperate/lysogenic | Yes | 3.0  |     | 0.0 |
| MSP0865 | haib17CEM4890_H75CGCCXY_SL263714.83  | 58298 | no  | Yes | Pseudomonas       | Pseudomonas aeruginosa           | Pseudomonas stutzeri A1501     | prophage/temperate/lysogenic | Yes | 26.0 |     | 0.0 |
| MSP0867 | haib17CEM4890_HKC32ALXX_SL254680.208 | 58182 | yes | No  |                   |                                  | Bacillus thermoamylovorans     | prophage/temperate/lysogenic | Yes | 8.0  |     | 0.0 |
| MSP0866 | haib17CEM4890_HKC32ALXX_SL254697.1   | 58182 | no  | No  |                   |                                  |                                | prophage/temperate/lysogenic | Yes | 8.0  |     | 0.0 |
| MSP0868 | haib17CEM4890_H2NYMCCXY_SL254807.178 | 58173 | no  | No  |                   |                                  |                                | prophage/temperate/lysogenic | Yes | 14.0 |     | 0.0 |
| MSP0869 | haib18CEM5453_HMGW3CCXY_SL342603.1   | 58168 | no  | No  |                   |                                  | Pseudomonas parafulva          | prophage/temperate/lysogenic | Yes | 29.0 |     | 0.0 |
| MSP0870 | haib17CEM4890_H2NYMCCXY_SL254772.303 | 58158 | no  | Yes |                   |                                  |                                | prophage/temperate/lysogenic | Yes | 11.0 |     | 0.0 |
| MSP0871 | haib17CEM4890_H75CGCCXY_SL263688.152 | 58105 | no  | No  |                   |                                  | Ruminococcus bicirculans       | virulent/lytic               | No  | 33.0 |     | 0.0 |
| MSP0872 | haib17CEM4890_HKC32ALXX_SL254762.38  | 58076 | no  | No  |                   |                                  |                                | virulent/lytic               | Yes | 13.0 |     | 0.0 |
| MSP0873 | haib17CEM5106_HCV72CCXY_SL269762.45  | 58046 | no  | Yes |                   |                                  | Cronobacter sakazakii ES15     | virulent/lytic               | No  | 31.0 |     | 0.0 |
| MSP0874 | haib17CEM4890_H2NYMCCXY_SL254808.32  | 58037 | no  | Yes |                   |                                  | Mixta calida                   | virulent/lytic               | Yes | 17.0 |     | 0.0 |
| MSP0875 | haib17CEM5106_HCV72CCXY_SL269786.231 | 58036 | no  | Yes | Pseudomonas       | Pseudomonas fluorescens          | Pseudomonas aeruginosa 19BR    | prophage/temperate/lysogenic | Yes | 28.0 |     | 0.0 |
| MSP0876 | haib17CEM4890_HKC32ALXX_SL254675.2   | 58014 | no  | No  | Gordonia          | Gordonia terrae                  |                                | prophage/temperate/lysogenic | Yes | 13.0 |     | 0.0 |
| MSP0877 | haib17KIU4866_HMCMJCCXY_SL335912.1   | 57966 | no  | No  |                   |                                  | Pseudomonas sp. MRSN12121      | virulent/lytic               | Yes | 22.0 |     | 0.0 |
| MSP0878 | haib17CEM5106_HCV72CCXY_SL269753.162 | 57965 | no  | Yes |                   |                                  |                                | prophage/temperate/lysogenic | Yes | 33.0 |     | 0.0 |
| MSP0880 | haib17KIU4866_H7HJMCCXY_SL272797.3   | 57954 | no  | No  |                   |                                  |                                | virulent/lytic               | Yes | 13.0 |     | 0.0 |
| MSP0881 | haib17CEM5106_HCV72CCXY_SL269786.233 | 57952 | no  | Yes |                   |                                  | Pseudomonas aeruginosa 19BR    | prophage/temperate/lysogenic | Yes | 31.0 | 1.0 | 0.0 |
| MSP0882 | haib17CEM4890_H2NYMCCXY_SL254769.221 | 57921 | no  | Yes |                   |                                  |                                | prophage/temperate/lysogenic | Yes | 24.0 |     | 0.0 |
| MSP0883 | haib17CEM4890_H2NYMCCXY_SL254790.79  | 57909 | no  | No  |                   |                                  |                                | prophage/temperate/lysogenic | Yes | 18.0 |     | 0.0 |
| MSP0884 | haib17CEM4890_H7KYMCCXY_SL273060.41  | 57825 | no  | Yes |                   |                                  | Haemophilus sp. oral taxon 036 | prophage/temperate/lysogenic | No  | 27.0 |     | 0.0 |
| MSP0885 | haib17CEM5106_HCY5JCCXY_SL269563.21  | 57777 | no  | Yes |                   |                                  |                                | prophage/temperate/lysogenic | Yes | 31.0 |     | 0.0 |
| MSP0886 | haib17CEM4890_HKC32ALXX_SL254728.279 | 57764 | no  | Yes | Clostridium       | None                             | Clostridium botulinum          | prophage/temperate/lysogenic | Yes | 12.0 |     | 0.0 |
| MSP0887 | haib18CEM5453_HMC2KCCXY_SL336773.20  | 57759 | no  | No  |                   |                                  |                                | prophage/temperate/lysogenic | Yes | 18.0 |     | 0.0 |
| MSP0888 | haib17CEM4890_HKC32ALXX_SL254765.155 | 57649 | no  | No  |                   |                                  |                                | prophage/temperate/lysogenic | Yes | 15.0 |     | 0.0 |

Table S1

|         |                                      |       |     |     |                  |                              |  |                                                       |                              |     |      |     |
|---------|--------------------------------------|-------|-----|-----|------------------|------------------------------|--|-------------------------------------------------------|------------------------------|-----|------|-----|
| MSP0889 | haib17CEM4890_HKC32ALXX_SL254706.273 | 57627 | no  | Yes |                  |                              |  | <i>Citrobacter koseri</i>                             | virulent/lytic               | Yes | 24.0 | 0.0 |
| MSP0890 | haib17CEM4890_HKC32ALXX_SL254680.209 | 57606 | no  | Yes |                  |                              |  | <i>Aquiflexum balticum</i> DSM 16537                  | prophage/temperate/lysogenic | Yes | 33.0 | 0.0 |
| MSP0891 | haib17KIU4866_HMCMJCCXY_SL335938.84  | 57602 | no  | Yes |                  |                              |  | <i>Pseudomonas balerica</i> DSM 6083                  | prophage/temperate/lysogenic | No  | 30.0 | 1.0 |
| MSP0892 | haib17CEM4890_H2NYMCCXY_SL254793.134 | 57597 | yes | No  |                  |                              |  | <i>Xanthomonas campestris</i> pv. <i>raphani</i>      | virulent/lytic               | Yes | 17.0 | 1.0 |
| MSP0893 | haib17CEM4890_H75CGCCXY_SL263703.1   | 57586 | yes | No  |                  |                              |  |                                                       | prophage/temperate/lysogenic | Yes | 7.0  | 0.0 |
| MSP0894 | haib17CEM4890_HKC32ALXX_SL254728.280 | 57583 | yes | No  | Bacillus         | Bacillus cereus              |  | <i>Bacillus thuringiensis</i>                         | prophage/temperate/lysogenic | Yes | 11.0 | 0.0 |
| MSP0896 | haib18CEM5453_HMGW3CCXY_SL342349.1   | 57533 | no  | No  |                  |                              |  |                                                       | virulent/lytic               | No  | 16.0 | 0.0 |
| MSP0898 | haib17CEM5106_HCY5HCCXY_SL270977.117 | 57484 | no  | No  |                  |                              |  |                                                       | prophage/temperate/lysogenic | Yes | 14.0 | 0.0 |
| MSP0900 | haib17CEM5106_HCV72CCXY_SL269728.124 | 57459 | no  | Yes |                  |                              |  |                                                       | prophage/temperate/lysogenic | Yes | 25.0 | 0.0 |
| MSP0899 | haib18CEM5453_HMGNSCCXY_SL344653.2   | 57459 | yes | No  |                  |                              |  |                                                       | prophage/temperate/lysogenic | Yes | 5.0  | 0.0 |
| MSP0901 | haib17CEM4890_H2NYMCCXY_SL254794.475 | 57380 | no  | Yes |                  |                              |  | <i>Klebsiella pneumoniae</i>                          | prophage/temperate/lysogenic | No  | 31.0 | 1.0 |
| MSP0902 | haib17KIU4866_H7HJMCCXY_SL272827.85  | 57346 | no  | Yes |                  |                              |  | <i>Cedecea neteri</i>                                 | virulent/lytic               | Yes | 29.0 | 0.0 |
| MSP0903 | haib17CEM5106_HCY5JCCXY_SL269559.88  | 57330 | no  | Yes |                  |                              |  |                                                       | prophage/temperate/lysogenic | Yes | 29.0 | 0.0 |
| MSP0904 | haib17CEM4890_H2NYMCCXY_SL254784.392 | 57305 | no  | Yes |                  |                              |  |                                                       | prophage/temperate/lysogenic | Yes | 13.0 | 0.0 |
| MSP0906 | haib17CEM4890_H2NYMCCXY_SL254831.276 | 57214 | no  | Yes |                  |                              |  |                                                       | prophage/temperate/lysogenic | Yes | 15.0 | 0.0 |
| MSP0907 | haib17CEM5106_HCY5JCCXY_SL269565.38  | 57125 | no  | Yes |                  |                              |  |                                                       | prophage/temperate/lysogenic | Yes | 32.0 | 0.0 |
| MSP0908 | haib17CEM4890_HKC32ALXX_SL254705.246 | 57073 | no  | Yes |                  |                              |  | <i>Pectobacterium versatile</i>                       | prophage/temperate/lysogenic | Yes | 23.0 | 0.0 |
| MSP0909 | haib17CEM4890_H2NYMCCXY_SL254793.138 | 57063 | no  | Yes |                  |                              |  | <i>Clostridium kluveri</i> NBRC 12016                 | prophage/temperate/lysogenic | Yes | 31.0 | 0.0 |
| MSP0910 | haib17CEM5106_HCY5JCCXY_SL269546.94  | 57058 | no  | Yes |                  |                              |  | <i>Leclercia adecarboxylata</i>                       | prophage/temperate/lysogenic | Yes | 33.0 | 0.0 |
| MSP0911 | haib17CEM4890_H2NYMCCXY_SL254819.253 | 57029 | no  | Yes |                  |                              |  |                                                       | prophage/temperate/lysogenic | Yes | 16.0 | 0.0 |
| MSP0912 | haib17CEM4890_HKC32ALXX_SL254742.261 | 57018 | no  | No  |                  |                              |  |                                                       | prophage/temperate/lysogenic | Yes | 8.0  | 0.0 |
| MSP0913 | haib17CEM4890_H2NYMCCXY_SL254848.53  | 56835 | no  | No  | Bacillus         | Bacillus cereus              |  | <i>Bacillus cereus</i> AH1271                         | prophage/temperate/lysogenic | Yes | 12.0 | 0.0 |
| MSP0914 | haib17CEM5106_HCY5JCCXY_SL269538.205 | 56806 | no  | Yes | Arthrobacter     | Arthrobacter globiformis     |  |                                                       | virulent/lytic               | Yes | 31.0 | 0.0 |
| MSP0915 | haib17CEM5106_HCV72CCXY_SL269731.104 | 56770 | no  | Yes | Acinetobacter    | Acinetobacter baumannii      |  | <i>Ruminococcus bicirculans</i>                       | virulent/lytic               | Yes | 31.0 | 0.0 |
| MSP0916 | haib17CEM4890_H2NYMCCXY_SL254772.316 | 56759 | no  | No  | Faecalibacterium | Faecalibacterium prausnitzii |  |                                                       | prophage/temperate/lysogenic | Yes | 10.0 | 0.0 |
| MSP0917 | haib17CEM4890_H75CGCCXY_SL263664.71  | 56750 | no  | Yes |                  |                              |  | <i>Xanthomonas albilineans</i> GPE PC73               | prophage/temperate/lysogenic | Yes | 24.0 | 0.0 |
| MSP0918 | haib17CEM4890_H2NYMCCXY_SL254814.85  | 56718 | no  | Yes |                  |                              |  |                                                       | virulent/lytic               | Yes | 23.0 | 0.0 |
| MSP0919 | haib17CEM5106_HCY5JCCXY_SL269569.56  | 56656 | no  | Yes |                  |                              |  |                                                       | prophage/temperate/lysogenic | Yes | 23.0 | 0.0 |
| MSP0920 | haib17CEM4890_H2NYMCCXY_SL254830.275 | 56561 | no  | Yes |                  |                              |  | <i>Serratia plymuthica</i> AS9                        | prophage/temperate/lysogenic | Yes | 23.0 | 0.0 |
| MSP0921 | haib17CEM4890_H2NYMCCXY_SL254783.341 | 56548 | no  | Yes |                  |                              |  | <i>Kosakonia cowanii</i> JCM 10956 = DSM 18146        | virulent/lytic               | No  | 23.0 | 0.0 |
| MSP0922 | haib17KIU4866_H7HJMCCXY_SL272741.34  | 56537 | no  | Yes |                  |                              |  | <i>Kosakonia cowanii</i> JCM 10956 = DSM 18146        | prophage/temperate/lysogenic | Yes | 27.0 | 0.0 |
| MSP0923 | haib17CEM5106_HCV72CCXY_SL269784.70  | 56536 | no  | Yes |                  |                              |  |                                                       | virulent/lytic               | Yes | 31.0 | 0.0 |
| MSP0924 | haib17CEM5106_HCY5JCCXY_SL269557.70  | 56529 | no  | No  |                  |                              |  | <i>Geminocystis herdmanni</i> PCC 6308                | prophage/temperate/lysogenic | Yes | 33.0 | 0.0 |
| MSP0925 | haib17DB4959_H3MGVCCXY_SL259882.44   | 56480 | yes | No  | Xylella          | Xylella fastidiosa           |  |                                                       | virulent/lytic               | Yes | 13.0 | 0.0 |
| MSP0926 | haib17CEM4890_HKC32ALXX_SL254685.2   | 56452 | no  | No  |                  |                              |  |                                                       | virulent/lytic               | Yes | 21.0 | 0.0 |
| MSP0927 | haib17CEM4890_HKC32ALXX_SL254763.87  | 56428 | no  | No  |                  |                              |  |                                                       | prophage/temperate/lysogenic | Yes | 14.0 | 0.0 |
| MSP0928 | haib17CEM5106_HCVMTCCXY_SL269600.83  | 56380 | no  | Yes |                  |                              |  |                                                       | prophage/temperate/lysogenic | Yes | 25.0 | 0.0 |
| MSP0929 | haib17KIU4866_H7HJMCCXY_SL272804.55  | 56373 | no  | Yes |                  |                              |  | <i>Pectobacterium odoriferum</i>                      | prophage/temperate/lysogenic | No  | 31.0 | 0.0 |
| MSP0930 | haib17CEM4890_H2NYMCCXY_SL254843.393 | 56318 | no  | Yes |                  |                              |  |                                                       | prophage/temperate/lysogenic | Yes | 15.0 | 0.0 |
| MSP0931 | haib17KIU4866_H7HJMCCXY_SL272823.42  | 56298 | no  | Yes |                  |                              |  | <i>Pseudomonas aeruginosa</i>                         | virulent/lytic               | Yes | 28.0 | 1.0 |
| MSP0934 | haib17KIU4866_H7HJMCCXY_SL272786.102 | 56160 | no  | Yes | Pseudomonas      | None                         |  | <i>Pseudomonas aeruginosa</i>                         | prophage/temperate/lysogenic | Yes | 30.0 | 0.0 |
| MSP0935 | haib17CEM4890_HKC32ALXX_SL254680.221 | 56156 | no  | Yes |                  |                              |  | <i>Kosakonia cowanii</i> JCM 10956 = DSM 18146        | prophage/temperate/lysogenic | No  | 33.0 | 0.0 |
| MSP0936 | haib18CEM5453_H75YVCCXY_SL357297.2   | 56104 | yes | No  | Xylella          | Xylella fastidiosa           |  |                                                       | virulent/lytic               | No  | 22.0 | 0.0 |
| MSP0938 | haib17CEM4890_H2NYMCCXY_SL254855.235 | 56036 | no  | Yes |                  |                              |  |                                                       | prophage/temperate/lysogenic | Yes | 13.0 | 0.0 |
| MSP0940 | haib17CEM4890_H2NYMCCXY_SL254784.411 | 56006 | no  | Yes |                  |                              |  |                                                       | prophage/temperate/lysogenic | Yes | 18.0 | 0.0 |
| MSP0939 | haib17CEM5106_HCY5HCCXY_SL270989.88  | 56006 | no  | Yes |                  |                              |  | <i>Corynebacterium jeikeium</i>                       | prophage/temperate/lysogenic | Yes | 31.0 | 0.0 |
| MSP0941 | haib17CEM4890_H2NYMCCXY_SL254807.184 | 56002 | no  | No  |                  |                              |  | <i>Olsenella umbonata</i>                             | prophage/temperate/lysogenic | No  | 15.0 | 0.0 |
| MSP0942 | haib17CEM4890_H75CGCCXY_SL263640.136 | 55980 | no  | Yes |                  |                              |  |                                                       | prophage/temperate/lysogenic | Yes | 9.0  | 0.0 |
| MSP0944 | haib17CEM4890_H2NYMCCXY_SL254814.88  | 55933 | no  | Yes | Cronobacter      | None                         |  | <i>Kosakonia cowanii</i> JCM 10956 = DSM 18146        | prophage/temperate/lysogenic | Yes | 24.0 | 0.0 |
| MSP0945 | haib17CEM4890_HKC32ALXX_SL254692.122 | 55883 | no  | No  |                  |                              |  |                                                       | virulent/lytic               | Yes | 17.0 | 0.0 |
| MSP0946 | haib17CEM5106_HCV72CCXY_SL269773.134 | 55831 | no  | Yes |                  |                              |  | <i>Pseudomonas</i> sp. <i>CMR12a</i>                  | prophage/temperate/lysogenic | Yes | 28.0 | 0.0 |
| MSP0947 | haib17KIU4866_H7HJMCCXY_SL272826.153 | 55829 | no  | No  |                  |                              |  |                                                       | prophage/temperate/lysogenic | Yes | 13.0 | 0.0 |
| MSP0948 | haib17CEM4890_H7KYMCCXY_SL273082.1   | 55806 | no  | No  |                  |                              |  | <i>Klebsiella pneumoniae</i> subsp. <i>pneumoniae</i> | virulent/lytic               | Yes | 19.0 | 1.0 |
| MSP0949 | haib17KIU4866_H7HJMCCXY_SL272787.20  | 55803 | no  | Yes |                  |                              |  | <i>Acinetobacter</i> sp. <i>ACNIH1</i>                | prophage/temperate/lysogenic | Yes | 31.0 | 0.0 |
| MSP0950 | haib17CEM4890_H75CGCCXY_SL263677.75  | 55792 | no  | Yes |                  |                              |  |                                                       | prophage/temperate/lysogenic | Yes | 25.0 | 0.0 |
| MSP0951 | haib17CEM4890_H75CGCCXY_SL263689.101 | 55772 | no  | No  |                  |                              |  | <i>Klebsiella pneumoniae</i> subsp. <i>pneumoniae</i> | prophage/temperate/lysogenic | Yes | 16.0 | 1.0 |
| MSP0952 | haib17CEM4890_HKC32ALXX_SL254764.246 | 55764 | no  | Yes |                  |                              |  |                                                       | virulent/lytic               | Yes | 7.0  | 0.0 |
| MSP0953 | haib17CEM4890_H3KHWCXY_SL263364.1    | 55762 | no  | No  |                  |                              |  | <i>Pectobacterium parmentieri</i> WPP163              | virulent/lytic               | Yes | 16.0 | 0.0 |
| MSP0954 | haib17KIU4866_H7HJMCCXY_SL272776.114 | 55761 | no  | No  |                  |                              |  |                                                       | virulent/lytic               | Yes | 12.0 | 0.0 |
| MSP0955 | haib17CEM4890_H75CGCCXY_SL263690.50  | 55717 | no  | Yes |                  |                              |  | <i>Pectobacterium versatile</i>                       | prophage/temperate/lysogenic | Yes | 33.0 | 0.0 |
| MSP0956 | haib17DB4959_HMCMJCCXY_SL336172.14   | 55692 | no  | No  |                  |                              |  |                                                       | prophage/temperate/lysogenic | Yes | 32.0 | 0.0 |
| MSP0957 | haib17KIU4866_HMCMJCCXY_SL335936.58  | 55661 | no  | No  |                  |                              |  |                                                       | virulent/lytic               | Yes | 14.0 | 0.0 |
| MSP0959 | haib17CEM4890_H75CGCCXY_SL263652.198 | 55648 | no  | No  |                  |                              |  |                                                       | virulent/lytic               | Yes | 25.0 | 0.0 |
| MSP0958 | haib17CEM4890_H7KYMCCXY_SL273105.1   | 55648 | no  | Yes |                  |                              |  | <i>Klebsiella</i> sp. <i>PO552</i>                    | virulent/lytic               | Yes | 23.0 | 0.0 |
| MSP0960 | haib17CEM4890_H2NYMCCXY_SL254780.293 | 55637 | no  | Yes |                  |                              |  | <i>Desulfovibrio desulfuricans</i> ND132              | prophage/temperate/lysogenic | Yes | 32.0 | 0.0 |
| MSP0961 | haib17CEM4890_H75CGCCXY_SL263702.30  | 55538 | no  | Yes |                  |                              |  |                                                       | prophage/temperate/lysogenic | Yes | 29.0 | 0.0 |
| MSP0962 | haib17KIU4866_HMCMJCCXY_SL335949.96  | 55521 | no  | Yes |                  |                              |  |                                                       | virulent/lytic               | Yes | 32.0 | 0.0 |
| MSP0963 | haib17DB4959_H3MGVCCXY_SL259921.2    | 55473 | no  | No  |                  |                              |  | <i>Pseudomonas alcaliphila</i> JAB1                   | prophage/temperate/lysogenic | Yes | 24.0 | 0.0 |

Table S1

|         |                                      |       |     |     |                   |                                  |                                         |  |                              |     |      |     |
|---------|--------------------------------------|-------|-----|-----|-------------------|----------------------------------|-----------------------------------------|--|------------------------------|-----|------|-----|
| MSP0965 | haib17CEM5106_HCY5HCCXY_SL271138.82  | 55394 | no  | Yes |                   |                                  |                                         |  | virulent/lytic               | Yes | 31.0 | 0.0 |
| MSP0967 | haib17KIU4866_H7HJMCCXY_SL272792.15  | 55332 | no  | No  |                   |                                  | Enterobacter cloacae subsp. cloacae     |  | virulent/lytic               | Yes | 31.0 | 0.0 |
| MSP0968 | haib17CEM4890_HKC32ALXX_SL254696.5   | 55280 | no  | No  |                   |                                  |                                         |  | virulent/lytic               | Yes | 13.0 | 0.0 |
| MSP0969 | haib18CEM5453_HMC2KCCXY_SL336650.19  | 55207 | no  | No  |                   |                                  |                                         |  | prophage/temperate/lysogenic | Yes | 25.0 | 0.0 |
| MSP0970 | haib17CEM5106_HCY5HCCXY_SL270937.79  | 55192 | no  | No  |                   |                                  |                                         |  | prophage/temperate/lysogenic | Yes | 8.0  | 0.0 |
| MSP0971 | haib17CEM4890_H2NYMCCXY_SL254783.356 | 55120 | no  | Yes |                   |                                  |                                         |  | virulent/lytic               | Yes | 9.0  | 0.0 |
| MSP0972 | haib17CEM5106_HCV72CCXY_SL269766.49  | 55081 | yes | Yes |                   |                                  |                                         |  | prophage/temperate/lysogenic | Yes | 32.0 | 0.0 |
| MSP0973 | haib17CEM5106_HCVMTCCXY_SL269535.121 | 55066 | no  | Yes |                   |                                  | Psychrobacter sp. P11F6                 |  | virulent/lytic               | Yes | 27.0 | 0.0 |
| MSP0974 | haib17CEM4890_H2NYMCCXY_SL254844.27  | 54996 | no  | No  | Arthrobacter      | Arthrobacter_globiformis         |                                         |  | virulent/lytic               | Yes | 27.0 | 0.0 |
| MSP0975 | haib17CEM4890_H7KYMCCXY_SL273090.42  | 54986 | no  | Yes |                   |                                  | Xanthomonas campestris pv. raphani 756C |  | prophage/temperate/lysogenic | Yes | 31.0 | 1.0 |
| MSP0976 | haib17DB4959_H3MGVCCXY_SL259929.89   | 54970 | no  | Yes |                   |                                  | Enterobacter kobei                      |  | prophage/temperate/lysogenic | No  | 33.0 | 0.0 |
| MSP0977 | haib17CEM4890_H75CGCCXY_SL263649.92  | 54939 | yes | No  |                   |                                  | Listeria monocytogenes Finland 1998     |  | virulent/lytic               | Yes | 9.0  | 1.0 |
| MSP0978 | haib17KIU4866_H7HJMCCXY_SL272759.51  | 54912 | no  | No  |                   |                                  |                                         |  | virulent/lytic               | Yes | 11.0 | 0.0 |
| MSP0980 | haib17CEM4890_HKC32ALXX_SL254758.4   | 54870 | no  | No  |                   |                                  |                                         |  | virulent/lytic               | Yes | 23.0 | 0.0 |
| MSP0981 | haib17CEM5106_HCV72CCXY_SL269761.86  | 54837 | no  | Yes | Lactobacillus     | Lactobacillus_casei              |                                         |  | prophage/temperate/lysogenic | Yes | 24.0 | 0.0 |
| MSP0982 | haib17CEM5106_HCV72CCXY_SL269722.30  | 54693 | no  | Yes |                   |                                  | Pseudomonas pseudoalcaligenes CECT 5344 |  | virulent/lytic               | Yes | 33.0 | 0.0 |
| MSP0983 | haib17CEM4890_H2NYMCCXY_SL254853.103 | 54662 | no  | Yes |                   |                                  |                                         |  | prophage/temperate/lysogenic | Yes | 17.0 | 0.0 |
| MSP0985 | haib17KIU4866_H7HJMCCXY_SL272748.25  | 54581 | no  | Yes |                   |                                  | Serratia plymuthica AS9                 |  | virulent/lytic               | Yes | 31.0 | 0.0 |
| MSP0986 | haib17CEM4890_H2NYMCCXY_SL254806.283 | 54562 | yes | No  |                   |                                  |                                         |  | prophage/temperate/lysogenic | Yes | 8.0  | 0.0 |
| MSP0987 | haib17KIU4866_H7HJMCCXY_SL272796.160 | 54507 | no  | No  |                   |                                  | Klebsiella pneumoniae                   |  | prophage/temperate/lysogenic | Yes | 28.0 | 1.0 |
| MSP0988 | haib17CEM4890_H2NYMCCXY_SL254784.430 | 54476 | no  | Yes |                   |                                  |                                         |  | virulent/lytic               | Yes | 31.0 | 0.0 |
| MSP0989 | haib17CEM4890_HKC32ALXX_SL254742.283 | 54444 | no  | No  |                   |                                  |                                         |  | virulent/lytic               | Yes | 15.0 | 0.0 |
| MSP0990 | haib17KIU4866_H7HJMCCXY_SL272768.62  | 54424 | no  | Yes |                   |                                  | Halomonas ventosae                      |  | prophage/temperate/lysogenic | Yes | 29.0 | 0.0 |
| MSP0991 | haib17CEM5106_HCY5JCCXY_SL269566.55  | 54286 | no  | Yes |                   |                                  |                                         |  | virulent/lytic               | Yes | 30.0 | 0.0 |
| MSP0992 | haib17CEM4890_H2NYMCCXY_SL254794.501 | 54261 | no  | Yes |                   |                                  |                                         |  | prophage/temperate/lysogenic | Yes | 12.0 | 0.0 |
| MSP0993 | haib18CEM5453_HMC2KCCXY_SL336638.2   | 54231 | no  | No  |                   |                                  |                                         |  | virulent/lytic               | Yes | 32.0 | 0.0 |
| MSP0994 | haib17CEM4890_H2NYMCCXY_SL254794.503 | 54207 | no  | No  |                   |                                  | Klebsiella michiganensis                |  | prophage/temperate/lysogenic | Yes | 28.0 | 0.0 |
| MSP0995 | haib17CEM4890_H2NYMCCXY_SL254826.144 | 54191 | no  | Yes |                   |                                  | Cronobacter muytjensii ATCC 51329       |  | virulent/lytic               | Yes | 30.0 | 0.0 |
| MSP0997 | haib17CEM4890_H75CGCCXY_SL263677.82  | 54135 | no  | Yes | Xanthomonas       | None                             |                                         |  | virulent/lytic               | Yes | 31.0 | 0.0 |
| MSP0998 | haib17CEM4890_H2NYMCCXY_SL254819.270 | 54115 | no  | Yes |                   |                                  |                                         |  | prophage/temperate/lysogenic | Yes | 11.0 | 0.0 |
| MSP0999 | haib18CEM5453_HMC2KCCXY_SL336679.4   | 54109 | no  | No  |                   |                                  |                                         |  | virulent/lytic               | Yes | 33.0 | 0.0 |
| MSP1000 | haib17CEM5106_HCY5HCCXY_SL271097.52  | 53982 | no  | No  |                   |                                  | Clostridioides difficile                |  | prophage/temperate/lysogenic | Yes | 4.0  | 0.0 |
| MSP1001 | haib17KIU4866_H7HJMCCXY_SL272823.46  | 53969 | no  | Yes |                   |                                  | Acinetobacter sp. ACNIH1                |  | prophage/temperate/lysogenic | Yes | 28.0 | 0.0 |
| MSP1003 | haib17CEM4890_H2NYMCCXY_SL254790.86  | 53945 | yes | No  |                   |                                  | Enterobacter sp. 638                    |  | virulent/lytic               | Yes | 17.0 | 0.0 |
| MSP1004 | haib17CEM5106_HCY5JCCXY_SL269564.53  | 53902 | no  | Yes |                   |                                  |                                         |  | virulent/lytic               | Yes | 13.0 | 0.0 |
| MSP1006 | haib17CEM5106_HCY5JCCXY_SL269564.54  | 53787 | no  | Yes |                   |                                  | Clostridium botulinum A str. ATCC 3502  |  | prophage/temperate/lysogenic | Yes | 32.0 | 0.0 |
| MSP1007 | haib17DB4959_HMCMJCCXY_SL336180.3    | 53773 | no  | No  | Streptomyces      | None                             |                                         |  | virulent/lytic               | Yes | 12.0 | 0.0 |
| MSP1008 | haib17CEM5106_HCY5HCCXY_SL270984.80  | 53750 | no  | Yes |                   |                                  |                                         |  | prophage/temperate/lysogenic | Yes | 32.0 | 0.0 |
| MSP1010 | haib17CEM4890_HMCMJCCXY_SL335857.27  | 53717 | no  | Yes |                   |                                  |                                         |  | prophage/temperate/lysogenic | Yes | 32.0 | 0.0 |
| MSP1009 | haib17KIU4866_HMCMJCCXY_SL335938.91  | 53717 | no  | Yes |                   |                                  | Atlantibacter hermannii                 |  | prophage/temperate/lysogenic | Yes | 33.0 | 0.0 |
| MSP1011 | haib17CEM4890_H2NYMCCXY_SL254830.295 | 53668 | no  | Yes |                   |                                  | Enterobacter cloacae subsp. cloacae     |  | prophage/temperate/lysogenic | No  | 33.0 | 0.0 |
| MSP1012 | haib17CEM4890_HKC32ALXX_SL254762.45  | 53656 | no  | Yes |                   |                                  |                                         |  | prophage/temperate/lysogenic | Yes | 30.0 | 0.0 |
| MSP1013 | haib17CEM4890_H75CGCCXY_SL263700.123 | 53645 | no  | Yes |                   |                                  |                                         |  | prophage/temperate/lysogenic | Yes | 28.0 | 0.0 |
| MSP1014 | haib17CEM4890_H2NYMCCXY_SL254783.372 | 53583 | no  | No  |                   |                                  |                                         |  | prophage/temperate/lysogenic | Yes | 4.0  | 0.0 |
| MSP1015 | haib17CEM4890_H2NYMCCXY_SL254781.418 | 53581 | no  | Yes |                   |                                  | Brevibacillus sp. SCSIO 07484           |  | prophage/temperate/lysogenic | Yes | 10.0 | 0.0 |
| MSP1016 | haib17CEM4890_H7KYMCCXY_SL273087.6   | 53544 | no  | No  |                   |                                  | Pragia fontium                          |  | prophage/temperate/lysogenic | Yes | 13.0 | 0.0 |
| MSP1017 | haib17CEM4890_H75CGCCXY_SL263690.56  | 53541 | no  | No  |                   |                                  | Pseudomonas stutzeri A1501              |  | prophage/temperate/lysogenic | Yes | 22.0 | 1.0 |
| MSP1018 | haib17CEM4890_H2NYMCCXY_SL254788.62  | 53499 | no  | No  |                   |                                  |                                         |  | prophage/temperate/lysogenic | Yes | 32.0 | 0.0 |
| MSP1019 | haib17CEM5106_HCY5JCCXY_SL269590.34  | 53452 | no  | Yes |                   |                                  | Dickeya zeae                            |  | prophage/temperate/lysogenic | Yes | 26.0 | 0.0 |
| MSP1020 | haib17KIU4866_H7HJMCCXY_SL272800.149 | 53431 | no  | Yes |                   |                                  |                                         |  | virulent/lytic               | No  | 14.0 | 0.0 |
| MSP1021 | haib17KIU4866_H7HJMCCXY_SL272792.17  | 53374 | no  | No  |                   |                                  | Klebsiella pneumoniae                   |  | prophage/temperate/lysogenic | Yes | 20.0 | 1.0 |
| MSP1022 | haib17CEM5106_HCV72CCXY_SL269776.117 | 53350 | no  | Yes | Propionibacterium | Propionibacterium_freudenreichii |                                         |  | virulent/lytic               | Yes | 26.0 | 0.0 |
| MSP1023 | haib17CEM4890_H2NYMCCXY_SL254858.21  | 53291 | yes | No  |                   |                                  |                                         |  | virulent/lytic               | Yes | 26.0 | 0.0 |
| MSP1025 | haib17CEM4890_H75CGCCXY_SL263637.55  | 53276 | no  | No  |                   |                                  | Pseudomonas aeruginosa                  |  | prophage/temperate/lysogenic | Yes | 13.0 | 0.0 |
| MSP1024 | haib17CEM5106_HCCGHCCXY_SL270315.158 | 53276 | no  | Yes | Pseudomonas       | Pseudomonas_aeruginosa           | Pseudomonas aeruginosa                  |  | prophage/temperate/lysogenic | No  | 31.0 | 1.0 |
| MSP1026 | haib17CEM4890_H2NYMCCXY_SL254782.231 | 53271 | no  | No  |                   |                                  |                                         |  | prophage/temperate/lysogenic | Yes | 33.0 | 0.0 |
| MSP1027 | haib17CEM5106_HCY5HCCXY_SL270953.128 | 53267 | no  | Yes | Arthrobacter      | Arthrobacter_globiformis         |                                         |  | prophage/temperate/lysogenic | Yes | 31.0 | 0.0 |
| MSP1028 | haib18CEM5453_HNHKFCCXY_SL346109.20  | 53255 | yes | No  |                   |                                  | Thermobacillus composti KWC4            |  | virulent/lytic               | Yes | 15.0 | 0.0 |
| MSP1029 | haib17CEM5106_HCY5HCCXY_SL270961.98  | 53238 | no  | No  |                   |                                  |                                         |  | virulent/lytic               | Yes | 28.0 | 0.0 |
| MSP1031 | haib17CEM5106_HCV72CCXY_SL269718.116 | 53230 | no  | Yes |                   |                                  |                                         |  | prophage/temperate/lysogenic | Yes | 23.0 | 0.0 |
| MSP1032 | haib17CEM5106_HCY5HCCXY_SL270967.116 | 53184 | no  | Yes |                   |                                  |                                         |  | virulent/lytic               | Yes | 16.0 | 0.0 |
| MSP1033 | haib17CEM5106_HCY5HCCXY_SL270953.129 | 53140 | no  | Yes |                   |                                  | Psychrobacter sp. P11F6                 |  | virulent/lytic               | Yes | 24.0 | 0.0 |
| MSP1034 | haib18CEM5453_HMC2KCCXY_SL336808.1   | 53121 | no  | No  |                   |                                  | Neisseria mucosa                        |  | virulent/lytic               | No  | 31.0 | 0.0 |
| MSP1035 | haib17CEM4890_HKC32ALXX_SL254749.3   | 53085 | no  | No  |                   |                                  | Corynebacterium renale                  |  | prophage/temperate/lysogenic | No  | 24.0 | 0.0 |
| MSP1036 | haib17CEM4890_H2NYMCCXY_SL254843.434 | 53010 | no  | Yes |                   |                                  |                                         |  | virulent/lytic               | Yes | 9.0  | 0.0 |
| MSP1037 | haib17CEM4890_H2NYMCCXY_SL254825.15  | 52989 | yes | No  | Arthrobacter      | Arthrobacter_globiformis         |                                         |  | virulent/lytic               | Yes | 28.0 | 0.0 |
| MSP1038 | haib17CEM4890_HMCMJCCXY_SL335844.96  | 52976 | no  | Yes |                   |                                  | Paracoccus yevei                        |  | prophage/temperate/lysogenic | Yes | 29.0 | 0.0 |
| MSP1039 | haib17CEM5106_HCY5HCCXY_SL270976.184 | 52965 | no  | Yes |                   |                                  |                                         |  | prophage/temperate/lysogenic | Yes | 13.0 | 0.0 |



Table S1

|         |                                       |       |     |     |                |                            |                                                     |                              |     |      |  |     |
|---------|---------------------------------------|-------|-----|-----|----------------|----------------------------|-----------------------------------------------------|------------------------------|-----|------|--|-----|
| MSP1041 | haib17CEM4890_H2NYMCCXY_SL254793.159  | 52810 | no  | No  |                |                            |                                                     | prophage/temperate/lysogenic | Yes | 16.0 |  | 0.0 |
| MSP1042 | haib17CEM4890_H2NYMCCXY_SL254794.516  | 52797 | no  | Yes |                |                            |                                                     | prophage/temperate/lysogenic | Yes | 22.0 |  | 0.0 |
| MSP1043 | haib17CEM4890_H2NYMCCXY_SL254780.309  | 52762 | no  | Yes |                |                            | Dickeya sp. CSL RW240                               | prophage/temperate/lysogenic | Yes | 27.0 |  | 0.0 |
| MSP1044 | haib17KIU4866_H7HJMCCXY_SL272787.24   | 52751 | yes | No  |                |                            | Bradymonas sediminis                                | prophage/temperate/lysogenic | Yes | 30.0 |  | 0.0 |
| MSP1045 | haib17KIU4866_H7HJMCCXY_SL272778.121  | 52711 | no  | Yes |                |                            | Acinetobacter sp. LoGeW2-3                          | prophage/temperate/lysogenic | Yes | 22.0 |  | 0.0 |
| MSP1046 | haib17CEM4890_HKC32ALXX_SL254764.259  | 52704 | no  | Yes |                |                            | Pasteurella multocida subsp. gallicida              | prophage/temperate/lysogenic | No  | 21.0 |  | 0.0 |
| MSP1047 | haib17CEM4890_H2NYMCCXY_SL254769.259  | 52673 | no  | Yes |                |                            | Erwinia amylovora                                   | prophage/temperate/lysogenic | Yes | 14.0 |  | 0.0 |
| MSP1048 | haib17CEM4890_H2NYMCCXY_SL254859.1    | 52662 | no  | No  |                |                            | Klebsiella pneumoniae subsp. pneumoniae             | virulent/lytic               | Yes | 9.0  |  | 1.0 |
| MSP1049 | haib17CEM5106_HCVMTCCXY_SL269601.80   | 52631 | no  | Yes |                |                            | Micromonospora viridifaciens                        | prophage/temperate/lysogenic | Yes | 30.0 |  | 0.0 |
| MSP1050 | haib17CEM4890_H75CGCCXY_SL263714.95   | 52602 | no  | Yes |                |                            |                                                     | prophage/temperate/lysogenic | Yes | 29.0 |  | 0.0 |
| MSP1051 | haib17CEM4890_HKC32ALXX_SL254706.313  | 52599 | no  | Yes |                |                            |                                                     | virulent/lytic               | Yes | 32.0 |  | 0.0 |
| MSP1052 | haib17CEM4890_HKC32ALXX_SL254764.260  | 52590 | no  | Yes |                |                            | Serratia plymuthica AS9                             | prophage/temperate/lysogenic | Yes | 26.0 |  | 0.0 |
| MSP1054 | haib17CEM4890_H2NYMCCXY_SL254854.174  | 52570 | no  | Yes |                |                            | Pseudomonas stutzeri                                | prophage/temperate/lysogenic | Yes | 32.0 |  | 1.0 |
| MSP1055 | haib17CEM4890_HKC32ALXX_SL254699.11   | 52559 | yes | No  | Arthrobacter   | None                       | Thermobacter sp. FW80                               | virulent/lytic               | Yes | 29.0 |  | 0.0 |
| MSP1056 | haib17CEM4890_H2NYMCCXY_SL254842.94   | 52511 | no  | Yes |                |                            |                                                     | prophage/temperate/lysogenic | Yes | 13.0 |  | 0.0 |
| MSP1057 | haib17CEM4890_H2NYMCCXY_SL254787.2    | 52412 | no  | No  | Arthrobacter   | None                       |                                                     | virulent/lytic               | Yes | 25.0 |  | 0.0 |
| MSP1058 | haib17CEM5106_HCV72CCXY_SL269805.123  | 52411 | no  | No  |                |                            | Achromobacter xylosoxidans                          | prophage/temperate/lysogenic | Yes | 13.0 |  | 0.0 |
| MSP1059 | haib17CEM4890_HKC32ALXX_SL254764.261  | 52366 | no  | No  |                |                            |                                                     | virulent/lytic               | Yes | 22.0 |  | 0.0 |
| MSP1060 | haib17CEM5106_HCY5HCCXY_SL270942.98   | 52358 | no  | No  |                |                            |                                                     | virulent/lytic               | Yes | 25.0 |  | 0.0 |
| MSP1061 | haib17CEM5106_HCVMTCCXY_SL269597.65   | 52344 | no  | Yes | Pseudomonas    | Pseudomonas fluorescens    |                                                     | prophage/temperate/lysogenic | Yes | 33.0 |  | 1.0 |
| MSP1062 | haib17CEM4890_H2NYMCCXY_SL2549817.213 | 52330 | no  | Yes |                |                            |                                                     | virulent/lytic               | Yes | 32.0 |  | 0.0 |
| MSP1063 | haib17CEM5106_HCY5HCCXY_SL270977.126  | 52298 | no  | Yes |                |                            |                                                     | virulent/lytic               | Yes | 32.0 |  | 0.0 |
| MSP1064 | haib17CEM4890_H2NYMCCXY_SL254796.261  | 52251 | no  | Yes |                |                            |                                                     | prophage/temperate/lysogenic | Yes | 12.0 |  | 0.0 |
| MSP1065 | haib17CEM4890_HKC32ALXX_SL254681.303  | 52200 | no  | Yes |                |                            | Alkalihalobacillus clausii                          | virulent/lytic               | Yes | 14.0 |  | 0.0 |
| MSP1066 | haib17KIU4866_H7HJMCCXY_SL272748.35   | 52183 | no  | No  |                |                            | Pseudomonas stutzeri                                | virulent/lytic               | Yes | 20.0 |  | 1.0 |
| MSP1067 | haib17CEM4890_H2NYMCCXY_SL254793.161  | 52174 | no  | Yes |                |                            | Dickeya dianthicola IPO 980                         | prophage/temperate/lysogenic | No  | 18.0 |  | 0.0 |
| MSP1068 | haib17DB4959_HMCMJCCXY_SL336180.4     | 52151 | no  | No  |                |                            |                                                     | virulent/lytic               | Yes | 33.0 |  | 0.0 |
| MSP1069 | haib17CEM4890_HMCMJCCXY_SL335833.168  | 52146 | no  | Yes |                |                            |                                                     | prophage/temperate/lysogenic | Yes | 26.0 |  | 0.0 |
| MSP1070 | haib17CEM4890_HKC32ALXX_SL254699.12   | 52031 | no  | No  |                |                            |                                                     | virulent/lytic               | Yes | 19.0 |  | 0.0 |
| MSP1072 | haib17CEM4890_H75CGCCXY_SL263688.168  | 52022 | no  | Yes |                |                            |                                                     | prophage/temperate/lysogenic | No  | 33.0 |  | 0.0 |
| MSP1073 | haib17CEM4890_HKC32ALXX_SL254685.3    | 51993 | yes | No  |                |                            |                                                     | virulent/lytic               | Yes | 13.0 |  | 0.0 |
| MSP1074 | haib17CEM5106_HCV72CCXY_SL269776.124  | 51900 | no  | Yes |                |                            |                                                     | virulent/lytic               | No  | 15.0 |  | 0.0 |
| MSP1075 | haib17CEM4890_HKC32ALXX_SL254742.304  | 51884 | no  | No  |                |                            |                                                     | prophage/temperate/lysogenic | Yes | 15.0 |  | 0.0 |
| MSP1076 | haib17CEM4890_H75CGCCXY_SL263653.131  | 51786 | no  | Yes |                |                            |                                                     | virulent/lytic               | No  | 30.0 |  | 0.0 |
| MSP1077 | haib17CEM4890_H2NYMCCXY_SL254784.464  | 51782 | no  | No  |                |                            |                                                     | prophage/temperate/lysogenic | Yes | 15.0 |  | 0.0 |
| MSP1078 | haib17CEM4890_H2NYMCCXY_SL254818.314  | 51747 | no  | No  |                |                            |                                                     | prophage/temperate/lysogenic | Yes | 12.0 |  | 0.0 |
| MSP1079 | haib17KIU4866_H7HJMCCXY_SL272804.65   | 51713 | no  | Yes |                |                            | Salmonella enterica subsp. enterica serovar Sanjuan | prophage/temperate/lysogenic | No  | 32.0 |  | 1.0 |
| MSP1080 | haib17CEM4890_H2NYMCCXY_SL254831.311  | 51712 | no  | Yes |                |                            | Pseudomonas aeruginosa SCV20265                     | virulent/lytic               | Yes | 33.0 |  | 1.0 |
| MSP1081 | haib17CEM5241_HMGMHCCXY_SL343483.2    | 51632 | no  | No  |                |                            |                                                     | virulent/lytic               | Yes | 18.0 |  | 0.0 |
| MSP1082 | haib17KIU4866_HMCMJCCXY_SL335941.78   | 51615 | no  | Yes |                |                            | Citrobacter koseri                                  | prophage/temperate/lysogenic | Yes | 28.0 |  | 0.0 |
| MSP1083 | haib17DB4959_HMCMJCCXY_SL336180.5     | 51556 | yes | No  |                |                            |                                                     | virulent/lytic               | Yes | 16.0 |  | 0.0 |
| MSP1084 | haib17CEM4890_HKC32ALXX_SL254716.127  | 51549 | no  | Yes |                |                            |                                                     | prophage/temperate/lysogenic | Yes | 18.0 |  | 0.0 |
| MSP1085 | haib17CEM4890_H2NYMCCXY_SL254796.266  | 51530 | no  | Yes |                |                            | Pseudomonas balearica DSM 6083                      | prophage/temperate/lysogenic | Yes | 21.0 |  | 1.0 |
| MSP1086 | haib17CEM4890_HKC32ALXX_SL254746.38   | 51520 | no  | No  |                |                            |                                                     | prophage/temperate/lysogenic | Yes | 15.0 |  | 0.0 |
| MSP1087 | haib17CEM4890_HKC32ALXX_SL254719.9    | 51495 | no  | No  |                |                            |                                                     | prophage/temperate/lysogenic | Yes | 19.0 |  | 0.0 |
| MSP1088 | haib18CEM5453_HNHKFCCXY_SL345993.7    | 51485 | no  | No  |                |                            |                                                     | virulent/lytic               | Yes | 32.0 |  | 0.0 |
| MSP1089 | haib17CEM5106_HCY5HCCXY_SL270928.115  | 51412 | no  | Yes |                |                            |                                                     | prophage/temperate/lysogenic | Yes | 17.0 |  | 0.0 |
| MSP1090 | haib17CEM4890_HKC32ALXX_SL254681.308  | 51389 | no  | Yes |                |                            |                                                     | prophage/temperate/lysogenic | Yes | 15.0 |  | 0.0 |
| MSP1091 | haib17CEM5106_HCVMTCCXY_SL269529.33   | 51367 | yes | Yes |                |                            |                                                     | prophage/temperate/lysogenic | Yes | 12.0 |  | 0.0 |
| MSP1093 | haib17KIU4866_H7HJMCCXY_SL272782.58   | 51319 | no  | No  |                |                            |                                                     | prophage/temperate/lysogenic | Yes | 30.0 |  | 0.0 |
| MSP1094 | haib17CEM5106_HCY5JCCXY_SL269564.62   | 51308 | no  | Yes |                |                            |                                                     | prophage/temperate/lysogenic | Yes | 20.0 |  | 0.0 |
| MSP1095 | haib17CEM4890_HMCMJCCXY_SL335783.55   | 51271 | no  | No  |                |                            |                                                     | virulent/lytic               | Yes | 18.0 |  | 0.0 |
| MSP1096 | haib17CEM5106_HCV72CCXY_SL269752.157  | 51260 | yes | No  |                |                            | Corynebacterium sp. 2183                            | prophage/temperate/lysogenic | Yes | 16.0 |  | 0.0 |
| MSP1097 | haib17CEM4890_H2NYMCCXY_SL254850.71   | 51221 | no  | Yes | Arthrobacter   | Arthrobacter_globiformis   |                                                     | virulent/lytic               | Yes | 28.0 |  | 0.0 |
| MSP1098 | haib17CEM5106_HCV72CCXY_SL269805.127  | 51154 | no  | No  |                |                            |                                                     | prophage/temperate/lysogenic | Yes | 17.0 |  | 0.0 |
| MSP1099 | haib17CEM4890_H2NYMCCXY_SL254788.65   | 51100 | yes | No  |                |                            | Granulibacter bethedensis                           | virulent/lytic               | Yes | 16.0 |  | 0.0 |
| MSP1100 | haib17KIU4866_HMCMJCCXY_SL335949.104  | 51099 | no  | No  |                |                            |                                                     | virulent/lytic               | Yes | 30.0 |  | 0.0 |
| MSP1101 | haib17KIU4866_H7HJMCCXY_SL272827.91   | 51069 | no  | No  |                |                            |                                                     | prophage/temperate/lysogenic | Yes | 31.0 |  | 0.0 |
| MSP1102 | haib17CEM4890_H75CGCCXY_SL263651.175  | 51055 | no  | Yes |                |                            |                                                     | prophage/temperate/lysogenic | Yes | 29.0 |  | 0.0 |
| MSP1103 | haib17CEM4890_H2NYMCCXY_SL254781.435  | 51047 | no  | Yes |                |                            |                                                     | prophage/temperate/lysogenic | Yes | 12.0 |  | 0.0 |
| MSP1104 | haib18CEM5453_HMGW3CCXY_SL342529.1    | 51035 | no  | No  |                |                            |                                                     | virulent/lytic               | Yes | 17.0 |  | 0.0 |
| MSP1105 | haib17CEM5106_HCV72CCXY_SL269718.124  | 51004 | no  | Yes |                |                            |                                                     | prophage/temperate/lysogenic | Yes | 7.0  |  | 0.0 |
| MSP1106 | haib17CEM4890_HKC32ALXX_SL254705.278  | 50993 | no  | Yes |                |                            | Desulfallas gibsoniae DSM 7213                      | prophage/temperate/lysogenic | Yes | 33.0 |  | 0.0 |
| MSP1107 | haib17KIU4866_HMCMJCCXY_SL335939.46   | 50946 | no  | Yes |                |                            | Acinetobacter baumannii                             | virulent/lytic               | Yes | 30.0 |  | 1.0 |
| MSP1108 | haib17DB4959_H3MGVCCXY_SL259953.36    | 50928 | no  | No  | Staphylococcus | Staphylococcus_epidermidis |                                                     | prophage/temperate/lysogenic | No  | 22.0 |  | 1.0 |
| MSP1109 | haib18CEM5453_HTSYVCCXY_SL35713.1     | 50906 | yes | No  |                |                            |                                                     | virulent/lytic               | Yes | 8.0  |  | 0.0 |
| MSP1110 | haib17CEM4890_HKC32ALXX_SL254716.133  | 50905 | no  | No  |                |                            |                                                     | prophage/temperate/lysogenic | Yes | 9.0  |  | 0.0 |
| MSP1111 | haib17CEM4890_H2NYMCCXY_SL254853.116  | 50863 | no  | No  |                |                            |                                                     | prophage/temperate/lysogenic | Yes | 6.0  |  | 0.0 |

Table S1

|        |                                      |       |     |     |                  |                                                      |                           |                              |     |      |     |
|--------|--------------------------------------|-------|-----|-----|------------------|------------------------------------------------------|---------------------------|------------------------------|-----|------|-----|
| MSP113 | haib17KIU4866_H7HJMCCXY_SL272824.71  | 50773 | no  | Yes |                  |                                                      |                           | virulent/lytic               | No  | 32.0 | 0.0 |
| MSP114 | haib17DB4959_H3MGVCCXY_SL259822.49   | 50760 | no  | No  |                  |                                                      |                           | prophage/temperate/lysogenic | Yes | 21.0 | 0.0 |
| MSP115 | haib17CEM4890_H2NYMCCXY_SL254820.16  | 50746 | no  | Yes | Acinetobacter    | ursingii                                             |                           | prophage/temperate/lysogenic | Yes | 31.0 | 0.0 |
| MSP116 | haib17CEM4890_H2NYMCCXY_SL254830.314 | 50689 | no  | No  |                  |                                                      |                           | virulent/lytic               | Yes | 12.0 | 0.0 |
| MSP117 | haib18CEM5453_HNHG3CCXY_SL344549.17  | 50687 | no  | No  |                  |                                                      |                           | prophage/temperate/lysogenic | Yes | 7.0  | 0.0 |
| MSP118 | haib17CEM5106_HCY5JCCXY_SL269535.171 | 50676 | no  | Yes |                  |                                                      |                           | prophage/temperate/lysogenic | Yes | 11.0 | 0.0 |
| MSP119 | haib17CEM5106_HCV72CCXY_SL269750.124 | 50654 | no  | No  |                  | Pseudomonas mendocina ymp                            |                           | prophage/temperate/lysogenic | Yes | 33.0 | 0.0 |
| MSP120 | haib17CEM4890_HKC32ALXX_SL254680.246 | 50644 | no  | No  |                  |                                                      |                           | virulent/lytic               | Yes | 32.0 | 0.0 |
| MSP121 | haib17CEM4890_H2NYMCCXY_SL254849.57  | 50630 | no  | No  | Staphylococcus   | Staphylococcus aureus                                | Staphylococcus schleiferi | prophage/temperate/lysogenic | Yes | 20.0 | 0.0 |
| MSP122 | haib17KIU4866_HMCMJCCXY_SL335869.3   | 50624 | yes | No  | Arthrobacter     | None                                                 |                           | virulent/lytic               | Yes | 27.0 | 0.0 |
| MSP123 | haib17CEM4890_HKC32ALXX_SL254697.4   | 50619 | yes | No  | Arthrobacter     | Arthrobacter globiformis                             |                           | virulent/lytic               | Yes | 12.0 | 0.0 |
| MSP124 | haib18CEM5332_HK7G5CCXY_SL310962.1   | 50594 | no  | No  |                  |                                                      |                           | virulent/lytic               | Yes | 22.0 | 0.0 |
| MSP125 | haib17CEM5106_HCY5HCCXY_SL271171.1   | 50572 | no  | No  |                  | Acinetobacter sp. ACNIH1                             |                           | prophage/temperate/lysogenic | Yes | 29.0 | 0.0 |
| MSP126 | haib17CEM5106_HCVMTCCXY_SL269565.48  | 50557 | no  | Yes |                  |                                                      |                           | prophage/temperate/lysogenic | Yes | 27.0 | 0.0 |
| MSP127 | haib17CEM5106_HCVMTCCXY_SL269546.79  | 50550 | no  | Yes |                  | Propionibacterium freudenreichii                     |                           | prophage/temperate/lysogenic | Yes | 32.0 | 0.0 |
| MSP128 | haib17DB4959_H3MGVCCXY_SL259835.13   | 50547 | no  | Yes |                  | Miniomonas sp. S16                                   |                           | prophage/temperate/lysogenic | Yes | 28.0 | 0.0 |
| MSP129 | haib17KIU4866_H7HJMCCXY_SL272794.50  | 50537 | no  | No  |                  |                                                      |                           | virulent/lytic               | Yes | 29.0 | 0.0 |
| MSP130 | haib17CEM4890_H2NYMCCXY_SL254795.366 | 50532 | no  | No  |                  |                                                      |                           | prophage/temperate/lysogenic | Yes | 9.0  | 0.0 |
| MSP131 | haib17CEM4890_HMCMJCCXY_SL335842.3   | 50510 | no  | No  |                  |                                                      |                           | virulent/lytic               | Yes | 17.0 | 0.0 |
| MSP133 | haib17CEM4890_H2NYMCCXY_SL254794.540 | 50504 | no  | No  |                  | Klebsiella pneumoniae                                |                           | prophage/temperate/lysogenic | No  | 26.0 | 1.0 |
| MSP134 | haib17KIU4866_HMCMJCCXY_SL335939.48  | 50499 | no  | Yes |                  |                                                      |                           | prophage/temperate/lysogenic | Yes | 25.0 | 0.0 |
| MSP135 | haib17CEM4890_H2NYMCCXY_SL254830.317 | 50479 | no  | No  |                  | Desulfovibrio desulfuricans ND132                    |                           | prophage/temperate/lysogenic | Yes | 14.0 | 0.0 |
| MSP136 | haib17CEM5106_HCV72CCXY_SL269754.261 | 50460 | no  | Yes |                  |                                                      |                           | prophage/temperate/lysogenic | Yes | 31.0 | 0.0 |
| MSP137 | haib17CEM5106_HCV72CCXY_SL269740.60  | 50457 | no  | No  | Arthrobacter     | Arthrobacter globiformis                             |                           | prophage/temperate/lysogenic | Yes | 26.0 | 0.0 |
| MSP138 | haib17CEM5106_HCV72CCXY_SL269732.235 | 50446 | no  | Yes |                  |                                                      |                           | virulent/lytic               | Yes | 31.0 | 0.0 |
| MSP139 | haib17CEM4890_H2NYMCCXY_SL254831.317 | 50439 | no  | No  |                  | Enterobacter cloacae                                 |                           | prophage/temperate/lysogenic | Yes | 23.0 | 0.0 |
| MSP141 | haib18CEM5453_HMC2KCCXY_SL336784.4   | 50306 | no  | No  |                  |                                                      |                           | prophage/temperate/lysogenic | Yes | 27.0 | 0.0 |
| MSP142 | haib17CEM4890_H2NYMCCXY_SL254843.466 | 50303 | no  | Yes |                  |                                                      |                           | prophage/temperate/lysogenic | Yes | 13.0 | 0.0 |
| MSP143 | haib17CEM4890_H2NYMCCXY_SL254770.253 | 50263 | yes | No  | Escherichia      | Escherichia coli                                     |                           | virulent/lytic               | Yes | 9.0  | 1.0 |
| MSP144 | haib17CEM4890_HKC32ALXX_SL254693.189 | 50244 | no  | Yes |                  |                                                      |                           | prophage/temperate/lysogenic | Yes | 12.0 | 0.0 |
| MSP145 | haib17KIU4866_H7HJMCCXY_SL272827.92  | 50211 | no  | No  |                  | Salmonella enterica subsp. enterica serovar Kentucky |                           | prophage/temperate/lysogenic | Yes | 21.0 | 1.0 |
| MSP147 | haib17CEM4890_H2NYMCCXY_SL254820.18  | 50202 | no  | Yes |                  | Serratia sp. ATCC 39006                              |                           | prophage/temperate/lysogenic | No  | 33.0 | 0.0 |
| MSP149 | haib17CEM4890_HMCMJCCXY_SL335786.52  | 50175 | yes | No  |                  | Corynebacterium aurimucosum ATCC 700975              |                           | prophage/temperate/lysogenic | Yes | 21.0 | 0.0 |
| MSP151 | haib17CEM4890_H2NYMCCXY_SL254830.319 | 50168 | no  | Yes |                  |                                                      |                           | virulent/lytic               | Yes | 23.0 | 0.0 |
| MSP152 | haib17CEM4890_H2NYMCCXY_SL254778.50  | 50166 | no  | Yes |                  | Acinetobacter indicus                                |                           | prophage/temperate/lysogenic | Yes | 30.0 | 0.0 |
| MSP153 | haib17CEM4890_H2NYMCCXY_SL254784.492 | 50163 | yes | Yes | Faecalibacterium | Faecalibacterium prausnitzii                         |                           | virulent/lytic               | Yes | 11.0 | 0.0 |
| MSP154 | haib17CEM4890_H75CGCCXY_SL263650.109 | 50139 | no  | Yes |                  | Pseudomonas stutzeri A1501                           |                           | prophage/temperate/lysogenic | Yes | 31.0 | 1.0 |
| MSP155 | haib17CEM4890_HKC32ALXX_SL254688.14  | 50138 | no  | No  |                  | Bacillus thuringiensis serovar indiana               |                           | virulent/lytic               | Yes | 8.0  | 0.0 |
| MSP156 | haib17CEM4890_HKC32ALXX_SL254675.5   | 50114 | yes | No  | Arthrobacter     | None                                                 |                           | virulent/lytic               | Yes | 27.0 | 0.0 |
| MSP157 | haib17KIU4866_H7HJMCCXY_SL272738.39  | 50086 | no  | Yes |                  | Hungateiclostridium thermocellum ATCC 27405          |                           | prophage/temperate/lysogenic | Yes | 31.0 | 0.0 |
| MSP158 | haib17CEM4890_H75CGCCXY_SL263689.118 | 50056 | no  | Yes |                  |                                                      |                           | prophage/temperate/lysogenic | Yes | 30.0 | 0.0 |
| MSP159 | haib17CEM4890_H2NYMCCXY_SL254795.369 | 50055 | no  | Yes |                  | Thermoanaerobacterium thermosaccharolyticum M0795    |                           | prophage/temperate/lysogenic | Yes | 15.0 | 0.0 |
| MSP160 | haib17CEM4890_H2NYMCCXY_SL254841.206 | 50049 | no  | No  | Faecalibacterium | Faecalibacterium prausnitzii                         |                           | prophage/temperate/lysogenic | Yes | 6.0  | 0.0 |
| MSP161 | haib17KIU4866_H7HJMCCXY_SL272778.129 | 50021 | no  | Yes |                  | Pseudomonas aeruginosa                               |                           | virulent/lytic               | Yes | 33.0 | 1.0 |
| MSP162 | haib17CEM4890_H75CGCCXY_SL263652.229 | 50019 | no  | No  |                  | Dickeya sp. CSL RW240                                |                           | prophage/temperate/lysogenic | Yes | 25.0 | 0.0 |
| MSP163 | haib17CEM4890_H75CGCCXY_SL263637.61  | 50016 | no  | No  |                  |                                                      |                           | prophage/temperate/lysogenic | Yes | 33.0 | 0.0 |
| MSP164 | haib17CEM4890_H2NYMCCXY_SL254855.267 | 50015 | no  | No  |                  | Pseudomonas balearica DSM 6083                       |                           | prophage/temperate/lysogenic | Yes | 17.0 | 1.0 |
| MSP166 | haib17CEM4890_H2NYMCCXY_SL254770.256 | 49969 | no  | No  |                  | Pseudomonas stutzeri A1501                           |                           | prophage/temperate/lysogenic | Yes | 18.0 | 1.0 |
| MSP167 | haib17CEM4890_H3KHWCXY_SL263315.2    | 49925 | no  | No  | Pantoea          | Pantoea agglomerans                                  |                           | virulent/lytic               | Yes | 10.0 | 0.0 |
| MSP169 | haib17CEM5106_HCY5HCCXY_SL270942.105 | 49892 | no  | Yes |                  |                                                      |                           | prophage/temperate/lysogenic | Yes | 27.0 | 0.0 |
| MSP170 | haib17KIU4866_H7HJMCCXY_SL272744.71  | 49891 | no  | Yes |                  | Clostridium kluyveri NBRC 12016                      |                           | virulent/lytic               | Yes | 12.0 | 0.0 |
| MSP171 | haib17CEM4890_H75CGCCXY_SL263663.86  | 49876 | no  | No  |                  |                                                      |                           | prophage/temperate/lysogenic | Yes | 11.0 | 0.0 |
| MSP172 | haib17CEM5106_HCVMTCCXY_SL269593.56  | 49842 | no  | Yes |                  | Ornithinimicrobium sp. AMA3305                       |                           | prophage/temperate/lysogenic | Yes | 32.0 | 0.0 |
| MSP173 | haib17CEM5106_HCV72CCXY_SL269761.94  | 49828 | yes | No  |                  | Klebsiella pneumoniae subsp. pneumoniae              |                           | virulent/lytic               | No  | 12.0 | 1.0 |
| MSP174 | haib17CEM4890_H75CGCCXY_SL263665.75  | 49824 | no  | Yes |                  | Acinetobacter sp. WCHA45                             |                           | prophage/temperate/lysogenic | Yes | 30.0 | 0.0 |
| MSP175 | haib17CEM5106_HCV72CCXY_SL269721.46  | 49822 | no  | No  |                  | Pseudomonas stutzeri A1501                           |                           | prophage/temperate/lysogenic | Yes | 20.0 | 1.0 |
| MSP176 | haib17CEM4890_H2NYMCCXY_SL254796.287 | 49814 | no  | Yes |                  | Acinetobacter baumannii                              |                           | prophage/temperate/lysogenic | Yes | 33.0 | 1.0 |
| MSP178 | haib17CEM4890_H2NYMCCXY_SL254790.95  | 49784 | no  | No  |                  |                                                      |                           | virulent/lytic               | Yes | 33.0 | 0.0 |
| MSP179 | haib18CEM5453_HNHKFCXY_SL345904.20   | 49763 | no  | Yes |                  |                                                      |                           | virulent/lytic               | Yes | 5.0  | 0.0 |
| MSP180 | haib17CEM4890_HKC32ALXX_SL254700.91  | 49744 | yes | No  |                  |                                                      |                           | virulent/lytic               | Yes | 25.0 | 0.0 |
| MSP181 | haib17CEM4890_HKC32ALXX_SL254705.287 | 49730 | yes | No  |                  | Atlantibacter hermannii                              |                           | prophage/temperate/lysogenic | Yes | 11.0 | 0.0 |
| MSP182 | haib17DB4959_H3MGVCCXY_SL259917.1    | 49725 | no  | No  | Citrobacter      | None                                                 |                           | virulent/lytic               | Yes | 11.0 | 0.0 |
| MSP183 | haib17CEM4890_H75CGCCXY_SL263654.78  | 49627 | no  | No  |                  | Acinetobacter sp. ACNIH1                             |                           | prophage/temperate/lysogenic | Yes | 30.0 | 0.0 |
| MSP184 | haib17CEM5106_HCY5HCCXY_SL270929.96  | 49624 | no  | Yes |                  | Moraxella osloensis                                  |                           | prophage/temperate/lysogenic | Yes | 21.0 | 1.0 |
| MSP185 | haib17CEM4890_HKC32ALXX_SL254764.272 | 49623 | no  | No  |                  |                                                      |                           | prophage/temperate/lysogenic | Yes | 13.0 | 0.0 |
| MSP186 | haib17KIU4866_H7HJMCCXY_SL272742.10  | 49585 | no  | Yes |                  | Dickeya chrysanthemii Ech1591                        |                           | prophage/temperate/lysogenic | No  | 16.0 | 0.0 |
| MSP187 | haib17CEM5106_HCY5HCCXY_SL270932.62  | 49584 | no  | No  |                  |                                                      |                           | virulent/lytic               | Yes | 11.0 | 0.0 |
| MSP188 | haib17CEM5106_HCV72CCXY_SL269724.95  | 49561 | yes | No  |                  | Pseudomonas stutzeri A1501                           |                           | prophage/temperate/lysogenic | No  | 19.0 | 1.0 |

Table S1

|         |                                      |       |     |     |                |                         |  |                                            |                              |      |      |     |
|---------|--------------------------------------|-------|-----|-----|----------------|-------------------------|--|--------------------------------------------|------------------------------|------|------|-----|
| MSP1189 | haib17CEM4890_HKC32ALXX_SL254764.273 | 49552 | no  | Yes |                |                         |  | prophage/temperate/lysogenic               | Yes                          | 12.0 | 0.0  |     |
| MSP1190 | haib17CEM4890_HKC32ALXX_SL254742.328 | 49539 | no  | No  | Bacillus       | Bacillus anthracis      |  | prophage/temperate/lysogenic               | Yes                          | 10.0 | 0.0  |     |
| MSP1192 | haib17CEM4890_H75CGCCXY_SL263663.88  | 49403 | no  | Yes |                |                         |  | prophage/temperate/lysogenic               | Yes                          | 27.0 | 0.0  |     |
| MSP1193 | haib17KIU4866_H7HJMCCXY_SL272832.97  | 49389 | no  | No  |                |                         |  | prophage/temperate/lysogenic               | Yes                          | 33.0 | 0.0  |     |
| MSP1194 | haib17KIU4866_H7HJMCCXY_SL272791.41  | 49386 | no  | Yes |                |                         |  | prophage/temperate/lysogenic               | Yes                          | 32.0 | 1.0  |     |
| MSP1195 | haib17CEM4890_H2NYMCCXY_SL254795.375 | 49376 | no  | Yes |                |                         |  | prophage/temperate/lysogenic               | Yes                          | 16.0 | 0.0  |     |
| MSP1197 | haib17KIU4866_H7HJMCCXY_SL272751.95  | 49350 | no  | Yes |                |                         |  | prophage/temperate/lysogenic               | Yes                          | 14.0 | 0.0  |     |
| MSP1198 | haib17CEM4890_H2NYMCCXY_SL254856.60  | 49322 | no  | Yes |                |                         |  | virulent/lytic                             | Yes                          | 29.0 | 0.0  |     |
| MSP1199 | haib17CEM4890_H2NYMCCXY_SL254807.226 | 49303 | no  | Yes |                |                         |  | virulent/lytic                             | Yes                          | 13.0 | 0.0  |     |
| MSP1202 | haib17CEM5106_HCV72CCXY_SL269785.125 | 49267 | no  | No  |                |                         |  | virulent/lytic                             | Yes                          | 13.0 | 0.0  |     |
| MSP1204 | haib17KIU4866_H7HJMCCXY_SL272798.122 | 49238 | no  | No  |                |                         |  | prophage/temperate/lysogenic               | Yes                          | 33.0 | 0.0  |     |
| MSP1206 | haib17DB4959_H3MGVCCXY_SL259862.13   | 49127 | no  | No  |                |                         |  | virulent/lytic                             | Yes                          | 13.0 | 0.0  |     |
| MSP1207 | haib18CEM5526_HMGJTCCXY_SL342628.49  | 49109 | no  | Yes |                |                         |  | prophage/temperate/lysogenic               | Yes                          | 29.0 | 0.0  |     |
| MSP1208 | haib17KIU4866_HMCMJCCXY_SL335946.50  | 49107 | no  | Yes |                | Atlantibacter hermannii |  | prophage/temperate/lysogenic               | Yes                          | 28.0 | 0.0  |     |
| MSP1209 | haib18CEM5453_HNHKFCCXY_SL345981.14  | 49098 | yes | No  |                |                         |  | virulent/lytic                             | Yes                          | 17.0 | 0.0  |     |
| MSP1211 | haib17CEM4890_H2NYMCCXY_SL254830.329 | 49094 | no  | Yes |                |                         |  | prophage/temperate/lysogenic               | Yes                          | 11.0 | 0.0  |     |
| MSP1213 | haib17CEM5106_HCY5HCCXY_SL270975.113 | 49023 | no  | Yes |                |                         |  | virulent/lytic                             | Yes                          | 33.0 | 1.0  |     |
| MSP1214 | haib17CEM4890_HKC32ALXX_SL254705.291 | 49015 | no  | No  |                |                         |  | prophage/temperate/lysogenic               | Yes                          | 21.0 | 0.0  |     |
| MSP1215 | haib17CEM4890_H2NYMCCXY_SL254771.270 | 48987 | no  | Yes |                |                         |  | prophage/temperate/lysogenic               | Yes                          | 15.0 | 0.0  |     |
| MSP1216 | haib17CEM5106_HCV72CCXY_SL269754.269 | 48962 | no  | Yes |                |                         |  | prophage/temperate/lysogenic               | Yes                          | 21.0 | 0.0  |     |
| MSP1217 | haib17CEM4890_H2NYMCCXY_SL254815.29  | 48951 | no  | No  |                |                         |  | prophage/temperate/lysogenic               | Yes                          | 20.0 | 0.0  |     |
| MSP1219 | haib17CEM5106_HCV72CCXY_SL269734.29  | 48911 | no  | Yes |                |                         |  | virulent/lytic                             | Yes                          | 33.0 | 0.0  |     |
| MSP1220 | haib17CEM4890_H75CGCCXY_SL263662.61  | 48904 | yes | No  |                |                         |  | virulent/lytic                             | Yes                          | 11.0 | 0.0  |     |
| MSP1221 | haib17CEM4890_H2NYMCCXY_SL254850.80  | 48900 | no  | No  | Arthrobacter   | None                    |  | virulent/lytic                             | Yes                          | 29.0 | 0.0  |     |
| MSP1222 | haib17CEM4890_H2NYMCCXY_SL254817.226 | 48893 | no  | No  |                |                         |  | prophage/temperate/lysogenic               | Yes                          | 13.0 | 0.0  |     |
| MSP1223 | haib17CEM4890_HMCMJCCXY_SL335845.88  | 48892 | yes | No  |                |                         |  | prophage/temperate/lysogenic               | Yes                          | 23.0 | 0.0  |     |
| MSP1225 | haib17CEM4890_HKC32ALXX_SL254675.7   | 48833 | yes | No  |                |                         |  | virulent/lytic                             | Yes                          | 22.0 | 0.0  |     |
| MSP1226 | haib17KIU4866_HMCMJCCXY_SL335963.72  | 48788 | no  | Yes |                |                         |  | prophage/temperate/lysogenic               | Yes                          | 32.0 | 0.0  |     |
| MSP1227 | haib17CEM4890_H2NYMCCXY_SL254825.21  | 48747 | no  | No  |                |                         |  | virulent/lytic                             | Yes                          | 11.0 | 0.0  |     |
| MSP1228 | haib18CEM5453_HNHKFCCXY_SL346127.79  | 48742 | no  | Yes |                |                         |  | Micrococcus luteus                         | prophage/temperate/lysogenic | Yes  | 30.0 | 1.0 |
| MSP1229 | haib17CEM4890_H2NYMCCXY_SL254830.335 | 48716 | no  | No  |                |                         |  | prophage/temperate/lysogenic               | Yes                          | 33.0 | 0.0  |     |
| MSP1230 | haib17CEM5106_HCV72CCXY_SL269773.152 | 48714 | no  | No  |                |                         |  | Klebsiella pneumoniae                      | prophage/temperate/lysogenic | No   | 22.0 | 1.0 |
| MSP1232 | haib17CEM4890_HKC32ALXX_SL254718.235 | 48638 | no  | Yes |                |                         |  | Pseudomonas chlororaphis subsp. aurantiaca | prophage/temperate/lysogenic | Yes  | 26.0 | 0.0 |
| MSP1233 | haib17KIU4866_HMCMJCCXY_SL335925.15  | 48630 | yes | No  |                |                         |  | virulent/lytic                             | Yes                          | 3.0  | 0.0  |     |
| MSP1234 | haib17KIU4866_H7HJMCCXY_SL272803.118 | 48573 | no  | Yes | Enterobacter   | None                    |  | Dickeya dianthicola IPO 980                | prophage/temperate/lysogenic | Yes  | 17.0 | 0.0 |
| MSP1235 | haib17CEM4890_H2NYMCCXY_SL254784.518 | 48501 | no  | Yes |                |                         |  | Clostridium baratii str. Sullivan          | virulent/lytic               | Yes  | 15.0 | 0.0 |
| MSP1236 | haib17CEM4890_H2NYMCCXY_SL254844.36  | 48487 | no  | Yes |                |                         |  | Acinetobacter sp. ACNIH1                   | prophage/temperate/lysogenic | Yes  | 29.0 | 0.0 |
| MSP1237 | haib17CEM4890_H2NYMCCXY_SL254861.64  | 48456 | no  | Yes |                |                         |  | virulent/lytic                             | Yes                          | 27.0 | 0.0  |     |
| MSP1238 | haib17CEM4890_H2NYMCCXY_SL254806.328 | 48453 | no  | Yes |                |                         |  | prophage/temperate/lysogenic               | Yes                          | 26.0 | 0.0  |     |
| MSP1240 | haib17CEM4890_H75CGCCXY_SL263685.45  | 48319 | no  | No  |                |                         |  | prophage/temperate/lysogenic               | Yes                          | 15.0 | 0.0  |     |
| MSP1241 | haib17KIU4866_H7HJMCCXY_SL272799.102 | 48300 | no  | No  |                |                         |  | virulent/lytic                             | Yes                          | 7.0  | 0.0  |     |
| MSP1242 | haib17CEM4890_H2NYMCCXY_SL254831.339 | 48288 | no  | No  | Bacillus       | Bacillus cereus         |  | prophage/temperate/lysogenic               | Yes                          | 12.0 | 0.0  |     |
| MSP1244 | haib17KIU4866_H7HJMCCXY_SL272778.143 | 48246 | no  | Yes |                |                         |  | Pseudomonas balearica DSM 6083             | prophage/temperate/lysogenic | Yes  | 19.0 | 1.0 |
| MSP1243 | haib18CEM5526_HMGJTCCXY_SL342642.7   | 48246 | no  | No  |                |                         |  | Xanthomonas campestris pv. raphani 756C    | virulent/lytic               | Yes  | 32.0 | 1.0 |
| MSP1245 | haib18CEM5453_HMC2KCCXY_SL336638.3   | 48233 | no  | No  |                |                         |  | virulent/lytic                             | Yes                          | 33.0 | 0.0  |     |
| MSP1246 | haib17CEM5106_HCY5HCCXY_SL270912.56  | 48207 | no  | Yes |                |                         |  | virulent/lytic                             | No                           | 30.0 | 0.0  |     |
| MSP1247 | haib17CEM4890_HKC32ALXX_SL254680.265 | 48192 | no  | No  |                |                         |  | Clostridium botulinum                      | virulent/lytic               | Yes  | 22.0 | 0.0 |
| MSP1248 | haib17CEM4890_HKC32ALXX_SL254685.4   | 48179 | no  | No  |                |                         |  | virulent/lytic                             | Yes                          | 4.0  | 0.0  |     |
| MSP1249 | haib17CEM5106_HCY5JCCXY_SL269532.130 | 48117 | no  | Yes |                |                         |  | prophage/temperate/lysogenic               | Yes                          | 30.0 | 0.0  |     |
| MSP1250 | haib17CEM5106_HCY5HCCXY_SL270967.137 | 48087 | no  | Yes |                |                         |  | prophage/temperate/lysogenic               | Yes                          | 32.0 | 0.0  |     |
| MSP1251 | haib17CEM4890_H75CGCCXY_SL263709.47  | 48011 | no  | Yes |                |                         |  | prophage/temperate/lysogenic               | Yes                          | 16.0 | 0.0  |     |
| MSP1252 | haib17CEM5106_HCY5HCCXY_SL270952.76  | 47968 | no  | Yes |                |                         |  | prophage/temperate/lysogenic               | Yes                          | 18.0 | 0.0  |     |
| MSP1253 | haib17CEM5106_HCY5JCCXY_SL269586.62  | 47928 | no  | Yes |                |                         |  | Pseudomonas balearica DSM 6083             | virulent/lytic               | Yes  | 33.0 | 1.0 |
| MSP1254 | haib17CEM4890_H2NYMCCXY_SL254852.133 | 47924 | no  | No  |                |                         |  | prophage/temperate/lysogenic               | Yes                          | 31.0 | 0.0  |     |
| MSP1255 | haib17CEM4890_H2NYMCCXY_SL254854.200 | 47892 | no  | Yes |                |                         |  | Dickeya dianthicola IPO 980                | prophage/temperate/lysogenic | No   | 23.0 | 0.0 |
| MSP1256 | haib17CEM5106_HCY5HCCXY_SL270917.228 | 47890 | no  | Yes |                |                         |  | Actinobaculum sp. 313                      | virulent/lytic               | Yes  | 33.0 | 0.0 |
| MSP1257 | haib17CEM4890_H2NYMCCXY_SL254788.72  | 47869 | no  | No  | Staphylococcus | Staphylococcus aureus   |  | prophage/temperate/lysogenic               | Yes                          | 17.0 | 1.0  |     |
| MSP1259 | haib17DB4959_H3MGVCCXY_SL259906.14   | 47831 | no  | No  |                |                         |  | Rhodobacter sphaeroides                    | prophage/temperate/lysogenic | Yes  | 27.0 | 0.0 |
| MSP1260 | haib18CEM5453_HMGW3CCXY_SL342282.2   | 47830 | no  | No  |                |                         |  | virulent/lytic                             | Yes                          | 29.0 | 0.0  |     |
| MSP1261 | haib17CEM4890_HKC32ALXX_SL254693.199 | 47827 | no  | Yes |                |                         |  | Actinolloteichus hoggarensis               | prophage/temperate/lysogenic | Yes  | 33.0 | 0.0 |
| MSP1262 | haib17CEM5106_HCV72CCXY_SL269784.94  | 47824 | no  | Yes |                |                         |  | prophage/temperate/lysogenic               | Yes                          | 27.0 | 0.0  |     |
| MSP1263 | haib17CEM4890_H2NYMCCXY_SL254781.455 | 47794 | no  | Yes |                |                         |  | prophage/temperate/lysogenic               | Yes                          | 14.0 | 0.0  |     |
| MSP1264 | haib17KIU4866_H7HJMCCXY_SL272777.77  | 47792 | no  | No  |                |                         |  | Acinetobacter sp. LoGeW2-3                 | prophage/temperate/lysogenic | Yes  | 31.0 | 0.0 |
| MSP1266 | haib17CEM4890_HKC32ALXX_SL254740.104 | 47773 | no  | Yes |                |                         |  | Acinetobacter radioresistens               | prophage/temperate/lysogenic | No   | 28.0 | 0.0 |
| MSP1268 | haib17KIU4866_H7HJMCCXY_SL272754.22  | 47750 | no  | No  |                |                         |  | Raoultella ornithinolytica                 | virulent/lytic               | Yes  | 18.0 | 0.0 |
| MSP1270 | haib17KIU4866_H7HJMCCXY_SL272753.39  | 47734 | no  | No  |                |                         |  | prophage/temperate/lysogenic               | Yes                          | 12.0 | 0.0  |     |
| MSP1272 | haib17CEM5106_HCY5HCCXY_SL271110.105 | 47698 | no  | Yes |                |                         |  | Klebsiella pneumoniae subsp. pneumoniae    | prophage/temperate/lysogenic | Yes  | 31.0 | 1.0 |
| MSP1273 | haib17KIU4866_H7HJMCCXY_SL272749.24  | 47697 | no  | No  |                |                         |  | Acinetobacter baumannii                    | virulent/lytic               | Yes  | 31.0 | 1.0 |

Table S1

|         |                                      |       |     |     |                       |                                   |                                                |                              |     |      |     |
|---------|--------------------------------------|-------|-----|-----|-----------------------|-----------------------------------|------------------------------------------------|------------------------------|-----|------|-----|
| MSP1275 | haib17CEM5106_HCY5JCCXY_SL269546.126 | 47687 | no  | Yes |                       |                                   | <i>Acinetobacter defluvii</i>                  | virulent/lytic               | Yes | 26.0 | 0.0 |
| MSP1276 | haib17CEM5106_HCY5JCCXY_SL269610.106 | 47686 | no  | No  |                       |                                   |                                                | prophage/temperate/lysogenic | Yes | 18.0 | 0.0 |
| MSP1277 | haib17CEM5106_HCV72CCXY_SL269750.129 | 47629 | no  | Yes | <i>Pseudomonas</i>    | <i>Pseudomonas aeruginosa</i>     | <i>Pseudomonas fluorescens</i>                 | virulent/lytic               | Yes | 33.0 | 0.0 |
| MSP1278 | haib17CEM5106_HCV72CCXY_SL269769.88  | 47628 | no  | No  | <i>Gordonia</i>       | <i>Gordonia terrae</i>            | <i>Chelatococcus daeguensis</i>                | virulent/lytic               | Yes | 11.0 | 0.0 |
| MSP1279 | haib17CEM5106_HCY5HCCXY_SL270988.180 | 47622 | no  | No  |                       |                                   |                                                | virulent/lytic               | No  | 27.0 | 0.0 |
| MSP1280 | haib17KIU4866_H7HJMCCXY_SL272826.202 | 47592 | no  | No  |                       |                                   |                                                | prophage/temperate/lysogenic | Yes | 28.0 | 0.0 |
| MSP1281 | haib18CEM5453_HNHKFCXCY_SL346119.8   | 47590 | no  | Yes |                       |                                   | <i>Lawsonella clevelandensis</i>               | virulent/lytic               | No  | 30.0 | 0.0 |
| MSP1283 | haib17KIU4866_H7HJMCCXY_SL272756.50  | 47558 | yes | No  |                       |                                   |                                                | virulent/lytic               | Yes | 25.0 | 0.0 |
| MSP1285 | haib17KIU4866_H7HJMCCXY_SL272772.46  | 47538 | yes | No  |                       |                                   | <i>Pseudomonas stutzeri</i>                    | prophage/temperate/lysogenic | Yes | 20.0 | 1.0 |
| MSP1286 | haib17CEM4890_H75CGCCXY_SL263721.109 | 47513 | no  | Yes |                       |                                   |                                                | prophage/temperate/lysogenic | Yes | 28.0 | 0.0 |
| MSP1288 | haib17CEM4890_H2NYMCCXY_SL254782.260 | 47479 | no  | Yes |                       |                                   |                                                | prophage/temperate/lysogenic | Yes | 27.0 | 0.0 |
| MSP1289 | haib18CEM5453_HNHKFCXCY_SL345946.9   | 47455 | no  | No  |                       |                                   |                                                | prophage/temperate/lysogenic | Yes | 32.0 | 0.0 |
| MSP1290 | haib17KIU4866_HMCMJCCXY_SL335963.75  | 47450 | no  | Yes |                       |                                   |                                                | prophage/temperate/lysogenic | Yes | 31.0 | 0.0 |
| MSP1292 | haib17KIU4866_H7HJMCCXY_SL272824.88  | 47445 | no  | Yes |                       |                                   |                                                | prophage/temperate/lysogenic | Yes | 9.0  | 0.0 |
| MSP1293 | haib17CEM5106_HCY5HCCXY_SL270909.66  | 47444 | no  | No  |                       |                                   |                                                | prophage/temperate/lysogenic | Yes | 6.0  | 0.0 |
| MSP1294 | haib17CEM5106_HCY5JCCXY_SL269589.57  | 47410 | no  | Yes |                       |                                   |                                                | prophage/temperate/lysogenic | Yes | 15.0 | 0.0 |
| MSP1295 | haib17CEM4890_H2NYMCCXY_SL254806.337 | 47398 | no  | Yes |                       |                                   | <i>Delftia acidovorans</i>                     | prophage/temperate/lysogenic | Yes | 24.0 | 0.0 |
| MSP1296 | haib17CEM5241_HMGHMCCXY_SL343449.9   | 47379 | no  | No  |                       |                                   |                                                | prophage/temperate/lysogenic | Yes | 7.0  | 0.0 |
| MSP1297 | haib17CEM5106_HCY5JCCXY_SL269560.42  | 47345 | no  | Yes |                       |                                   | <i>Pseudomonas stutzeri</i>                    | prophage/temperate/lysogenic | Yes | 30.0 | 1.0 |
| MSP1298 | haib17CEM4890_H2NYMCCXY_SL254830.349 | 47339 | yes | No  |                       |                                   |                                                | virulent/lytic               | No  | 24.0 | 0.0 |
| MSP1299 | haib17CEM4890_H75CGCCXY_SL263665.80  | 47332 | no  | Yes |                       |                                   | <i>Acinetobacter sp. ACNIH1</i>                | prophage/temperate/lysogenic | Yes | 31.0 | 0.0 |
| MSP1300 | haib17KIU4866_H7HJMCCXY_SL272778.147 | 47326 | yes | No  |                       |                                   | <i>Pseudomonas stutzeri</i> A1501              | prophage/temperate/lysogenic | Yes | 20.0 | 1.0 |
| MSP1301 | haib17CEM4890_H2NYMCCXY_SL254805.277 | 47319 | no  | Yes |                       |                                   |                                                | prophage/temperate/lysogenic | Yes | 13.0 | 0.0 |
| MSP1302 | haib18CEM5453_HNGH3CCXY_SL344537.1   | 47299 | yes | No  |                       |                                   |                                                | virulent/lytic               | Yes | 6.0  | 0.0 |
| MSP1303 | haib17CEM4890_H2NYMCCXY_SL254848.68  | 47288 | no  | Yes |                       |                                   |                                                | prophage/temperate/lysogenic | Yes | 6.0  | 0.0 |
| MSP1304 | haib17CEM4890_H2NYMCCXY_SL254830.352 | 47286 | no  | Yes |                       |                                   | <i>Escherichia coli</i>                        | virulent/lytic               | Yes | 23.0 | 1.0 |
| MSP1305 | haib17CEM5106_HCY5JCCXY_SL269526.106 | 47264 | no  | Yes |                       |                                   |                                                | prophage/temperate/lysogenic | Yes | 31.0 | 0.0 |
| MSP1306 | haib17KIU4866_H7HJMCCXY_SL272796.194 | 47261 | no  | Yes | <i>Burkholderia</i>   | <i>Burkholderia thailandensis</i> | <i>Izhakiella sp. KSNA2</i>                    | prophage/temperate/lysogenic | No  | 30.0 | 0.0 |
| MSP1307 | haib17CEM5106_HCVMTCCXY_SL269598.131 | 47252 | no  | Yes |                       |                                   |                                                | prophage/temperate/lysogenic | Yes | 10.0 | 0.0 |
| MSP1308 | haib17CEM4890_H2NYMCCXY_SL254844.42  | 47246 | no  | Yes |                       |                                   | <i>Acinetobacter sp. ACNIH1</i>                | prophage/temperate/lysogenic | Yes | 29.0 | 0.0 |
| MSP1309 | haib17CEM5106_HCY5HCCXY_SL270906.83  | 47216 | no  | Yes |                       |                                   |                                                | prophage/temperate/lysogenic | Yes | 24.0 | 0.0 |
| MSP1310 | haib17CEM4890_H2NYMCCXY_SL254794.577 | 47198 | no  | Yes |                       |                                   |                                                | prophage/temperate/lysogenic | Yes | 9.0  | 0.0 |
| MSP1312 | haib17CEM5106_HCV72CCXY_SL269759.42  | 47191 | no  | Yes |                       |                                   |                                                | prophage/temperate/lysogenic | Yes | 20.0 | 0.0 |
| MSP1313 | haib17CEM4890_HKC32ALXX_SL254762.53  | 47160 | no  | Yes |                       |                                   | <i>Azospirillum ramasamyi</i>                  | prophage/temperate/lysogenic | Yes | 30.0 | 0.0 |
| MSP1314 | haib17CEM4890_H2NYMCCXY_SL254782.262 | 47122 | no  | Yes |                       |                                   |                                                | prophage/temperate/lysogenic | Yes | 15.0 | 0.0 |
| MSP1315 | haib17CEM4890_H75CGCCXY_SL263640.173 | 47108 | no  | Yes |                       |                                   | <i>Pseudomonas stutzeri</i> A1501              | prophage/temperate/lysogenic | Yes | 27.0 | 0.0 |
| MSP1316 | haib17KIU4866_H7HJMCCXY_SL272824.90  | 47088 | no  | Yes |                       |                                   |                                                | virulent/lytic               | Yes | 24.0 | 1.0 |
| MSP1318 | haib17CEM4890_HKC32ALXX_SL254742.347 | 47019 | no  | Yes |                       |                                   |                                                | prophage/temperate/lysogenic | Yes | 10.0 | 0.0 |
| MSP1319 | haib17CEM4890_HMCMJCCXY_SL335783.65  | 46974 | no  | Yes |                       |                                   | <i>Acinetobacter sp. ACNIH2</i>                | virulent/lytic               | Yes | 19.0 | 0.0 |
| MSP1320 | haib17CEM4890_H2NYMCCXY_SL254784.534 | 46956 | no  | No  |                       |                                   |                                                | prophage/temperate/lysogenic | Yes | 10.0 | 0.0 |
| MSP1322 | haib17CEM4890_H3KHWCCXY_SL263311.1   | 46929 | yes | No  | <i>Staphylococcus</i> | <i>Staphylococcus aureus</i>      | <i>Vagococcus sp. CF-49</i>                    | prophage/temperate/lysogenic | Yes | 19.0 | 0.0 |
| MSP1323 | haib17CEM4890_H75CGCCXY_SL263647.116 | 46882 | no  | Yes |                       |                                   | <i>Delftia acidovorans</i>                     | prophage/temperate/lysogenic | Yes | 31.0 | 0.0 |
| MSP1324 | haib17CEM4890_H75CGCCXY_SL263654.82  | 46867 | no  | Yes |                       |                                   | <i>Serratia plymuthica</i> AS9                 | prophage/temperate/lysogenic | Yes | 21.0 | 0.0 |
| MSP1326 | haib18CEM5453_HMC2KCCXY_SL336828.1   | 46790 | no  | Yes |                       |                                   | <i>Micrococcus luteus</i>                      | prophage/temperate/lysogenic | No  | 32.0 | 1.0 |
| MSP1327 | haib17KIU4866_H7HJMCCXY_SL272824.92  | 46789 | no  | Yes |                       |                                   |                                                | virulent/lytic               | Yes | 33.0 | 0.0 |
| MSP1328 | haib17CEM4890_H2NYMCCXY_SL254844.43  | 46778 | no  | Yes |                       |                                   | <i>Ruminococcus bicirculans</i>                | prophage/temperate/lysogenic | Yes | 24.0 | 0.0 |
| MSP1329 | haib18CEM5453_HT5YVCCXY_SL357286.5   | 46767 | no  | No  |                       |                                   |                                                | virulent/lytic               | Yes | 14.0 | 0.0 |
| MSP1330 | haib17CEM4890_H2NYMCCXY_SL254807.237 | 46727 | no  | No  |                       |                                   |                                                | virulent/lytic               | Yes | 11.0 | 0.0 |
| MSP1331 | haib17CEM4890_H2NYMCCXY_SL254796.323 | 46719 | no  | Yes |                       |                                   | <i>Acinetobacter soli</i>                      | prophage/temperate/lysogenic | Yes | 22.0 | 0.0 |
| MSP1332 | haib18CEM5453_HMC2KCCXY_SL336783.13  | 46707 | no  | No  |                       |                                   |                                                | prophage/temperate/lysogenic | Yes | 20.0 | 0.0 |
| MSP1333 | haib17CEM4890_H2NYMCCXY_SL254784.539 | 46698 | no  | Yes |                       |                                   | <i>Blautia producta</i>                        | prophage/temperate/lysogenic | Yes | 13.0 | 0.0 |
| MSP1334 | haib17CEM4890_H2NYMCCXY_SL254818.364 | 46668 | no  | Yes |                       |                                   | <i>Pseudomonas pseudoalcaligenes</i> CECT 5344 | virulent/lytic               | Yes | 33.0 | 0.0 |
| MSP1335 | haib18CEM5453_HNHKFCXCY_SL345981.15  | 46661 | no  | No  |                       |                                   | <i>Methylomicrobium album</i> BG8              | virulent/lytic               | Yes | 33.0 | 0.0 |
| MSP1337 | haib17CEM4890_HKC32ALXX_SL254764.294 | 46604 | yes | Yes |                       |                                   |                                                | prophage/temperate/lysogenic | Yes | 7.0  | 0.0 |
| MSP1338 | haib17CEM4890_HKC32ALXX_SL254711.88  | 46599 | yes | No  |                       |                                   | <i>Corynebacterium striatum</i>                | prophage/temperate/lysogenic | No  | 30.0 | 0.0 |
| MSP1339 | haib17CEM4890_H2NYMCCXY_SL254794.586 | 46592 | no  | Yes |                       |                                   | <i>Acinetobacter sp. ACNIH1</i>                | prophage/temperate/lysogenic | Yes | 29.0 | 0.0 |
| MSP1340 | haib17CEM5106_HCY5JCCXY_SL269601.82  | 46560 | no  | No  |                       |                                   |                                                | virulent/lytic               | Yes | 33.0 | 0.0 |
| MSP1341 | haib17CEM4890_H2NYMCCXY_SL254820.23  | 46559 | no  | No  |                       |                                   | <i>Acinetobacter baumannii</i>                 | prophage/temperate/lysogenic | Yes | 27.0 | 1.0 |
| MSP1342 | haib17KIU4866_H7HJMCCXY_SL272762.52  | 46548 | no  | No  |                       |                                   | <i>Leptothrix cholodnii</i> SP-6               | prophage/temperate/lysogenic | No  | 24.0 | 0.0 |
| MSP1344 | haib17KIU4866_HMCMJCCXY_SL335952.57  | 46519 | no  | Yes |                       |                                   | <i>Acinetobacter radioresistens</i>            | virulent/lytic               | Yes | 27.0 | 0.0 |
| MSP1346 | haib17CEM4890_HKC32ALXX_SL254681.350 | 46492 | no  | Yes |                       |                                   |                                                | virulent/lytic               | Yes | 14.0 | 0.0 |
| MSP1345 | haib17KIU4866_HMCMJCCXY_SL335925.17  | 46492 | yes | No  |                       |                                   |                                                | virulent/lytic               | Yes | 6.0  | 0.0 |
| MSP1347 | haib17KIU4866_H7HJMCCXY_SL272800.178 | 46450 | no  | No  |                       |                                   | <i>Pseudomonas stutzeri</i> A1501              | prophage/temperate/lysogenic | Yes | 19.0 | 1.0 |
| MSP1348 | haib17CEM4890_H2NYMCCXY_SL254814.130 | 46412 | no  | No  |                       |                                   | <i>Acinetobacter sp. ACNIH1</i>                | prophage/temperate/lysogenic | Yes | 27.0 | 0.0 |
| MSP1349 | haib17CEM4890_H75CGCCXY_SL263687.82  | 46398 | no  | No  |                       |                                   |                                                | prophage/temperate/lysogenic | Yes | 19.0 | 0.0 |
| MSP1350 | haib17CEM4890_HKC32ALXX_SL254764.295 | 46383 | yes | No  |                       |                                   |                                                | prophage/temperate/lysogenic | Yes | 16.0 | 0.0 |
| MSP1351 | haib17CEM4890_H2NYMCCXY_SL254772.400 | 46374 | no  | No  | <i>Pseudomonas</i>    | <i>Pseudomonas aeruginosa</i>     |                                                | prophage/temperate/lysogenic | Yes | 22.0 | 1.0 |
| MSP1352 | haib17CEM4890_H2NYMCCXY_SL254784.551 | 46332 | no  | Yes |                       |                                   |                                                | prophage/temperate/lysogenic | Yes | 5.0  | 0.0 |

Table S1

|         |               |                        |       |     |     |                |                            |                                                                                  |                              |     |      |  |     |
|---------|---------------|------------------------|-------|-----|-----|----------------|----------------------------|----------------------------------------------------------------------------------|------------------------------|-----|------|--|-----|
| MSP1353 | haib17CEM5106 | HCY5JCCXY_SL269596.165 | 46328 | no  | Yes |                |                            | <i>Enterococcus faecalis</i>                                                     | prophage/temperate/lysogenic | Yes | 22.0 |  | 1.0 |
| MSP1355 | haib17CEM4890 | HKC32ALXX_SL254719.19  | 46322 | no  | No  |                |                            | <i>Dickeya fangzhongdai</i>                                                      | prophage/temperate/lysogenic | Yes | 15.0 |  | 0.0 |
| MSP1354 | haib18CEM5453 | HNHKFCXXY_SL345455.1   | 46322 | no  | No  |                |                            |                                                                                  | prophage/temperate/lysogenic | Yes | 1.0  |  | 0.0 |
| MSP1358 | haib17CEM4890 | H2NYMCCXY_SL254805.283 | 46285 | no  | Yes |                |                            |                                                                                  | virulent/lytic               | Yes | 31.0 |  | 0.0 |
| MSP1360 | haib17CEM4890 | H2NYMCCXY_SL254805.284 | 46268 | no  | Yes |                |                            | <i>Xanthomonas campestris</i> pv. <i>raphani</i> 756C                            | virulent/lytic               | Yes | 33.0 |  | 1.0 |
| MSP1359 | haib17CEM4890 | HKC32ALXX_SL254746.43  | 46268 | yes | No  |                |                            |                                                                                  | virulent/lytic               | Yes | 14.0 |  | 0.0 |
| MSP1361 | haib17CEM4890 | H2NYMCCXY_SL254820.24  | 46266 | no  | No  |                |                            | <i>Klebsiella variicola</i>                                                      | prophage/temperate/lysogenic | Yes | 33.0 |  | 0.0 |
| MSP1362 | haib17CEM5106 | HCY5HCCXY_SL270942.118 | 46265 | no  | Yes |                |                            | <i>Pseudomonas parafulva</i>                                                     | prophage/temperate/lysogenic | Yes | 32.0 |  | 0.0 |
| MSP1363 | haib17CEM5106 | HCY5HCCXY_SL270912.59  | 46238 | no  | Yes |                |                            | <i>Salmonella enterica</i> subsp. <i>enterica</i> serovar <i>Montevideo</i> str. | prophage/temperate/lysogenic | No  | 32.0 |  | 1.0 |
| MSP1364 | haib17CEM5106 | HCV72CCXY_SL269750.135 | 46235 | no  | No  |                |                            | <i>Pseudomonas aeruginosa</i>                                                    | prophage/temperate/lysogenic | Yes | 27.0 |  | 1.0 |
| MSP1365 | haib17CEM4890 | H75CGCCXY_SL263687.83  | 46229 | no  | Yes |                |                            | <i>Halomonas hydrothermalis</i>                                                  | virulent/lytic               | Yes | 23.0 |  | 0.0 |
| MSP1366 | haib17CEM4890 | H2NYMCCXY_SL254784.554 | 46228 | no  | Yes |                |                            |                                                                                  | prophage/temperate/lysogenic | Yes | 11.0 |  | 0.0 |
| MSP1367 | haib17CEM4890 | H2NYMCCXY_SL254838.95  | 46216 | no  | No  |                |                            |                                                                                  | virulent/lytic               | Yes | 21.0 |  | 0.0 |
| MSP1368 | haib17CEM4890 | H2NYMCCXY_SL254806.352 | 46215 | no  | Yes |                |                            |                                                                                  | prophage/temperate/lysogenic | No  | 24.0 |  | 0.0 |
| MSP1370 | haib17CEM5106 | HCY5HCCXY_SL270958.89  | 46187 | yes | No  |                |                            |                                                                                  | prophage/temperate/lysogenic | Yes | 17.0 |  | 0.0 |
| MSP1371 | haib18CEM5453 | HMGNSCCXY_SL344649.1   | 46183 | yes | No  |                |                            |                                                                                  | virulent/lytic               | Yes | 2.0  |  | 0.0 |
| MSP1372 | haib18CEM5453 | HNHKFCXXY_SL345945.4   | 46163 | no  | No  |                |                            |                                                                                  | prophage/temperate/lysogenic | Yes | 32.0 |  | 0.0 |
| MSP1373 | haib17CEM4890 | HKC32ALXX_SL254716.162 | 46134 | no  | Yes |                |                            |                                                                                  | prophage/temperate/lysogenic | Yes | 18.0 |  | 0.0 |
| MSP1374 | haib17CEM4890 | HMCJMCCXY_SL335843.72  | 46126 | no  | Yes |                |                            |                                                                                  | prophage/temperate/lysogenic | Yes | 21.0 |  | 0.0 |
| MSP1375 | haib17CEM4890 | H7KYMCCXY_SL273105.3   | 46117 | no  | No  |                |                            | <i>Klebsiella variicola</i>                                                      | virulent/lytic               | Yes | 12.0 |  | 0.0 |
| MSP1376 | haib17CEM4890 | H75CGCCXY_SL263665.83  | 46102 | yes | No  |                |                            |                                                                                  | virulent/lytic               | Yes | 18.0 |  | 0.0 |
| MSP1377 | haib17DB4959  | H3MGVCCXY_SL259975.42  | 46063 | no  | No  | Staphylococcus | Staphylococcus aureus      |                                                                                  | prophage/temperate/lysogenic | Yes | 28.0 |  | 1.0 |
| MSP1378 | haib17CEM4890 | H2NYMCCXY_SL254805.285 | 46049 | no  | No  |                |                            |                                                                                  | prophage/temperate/lysogenic | Yes | 23.0 |  | 0.0 |
| MSP1379 | haib17CEM4890 | H75CGCCXY_SL263641.143 | 46042 | no  | No  |                |                            | <i>Pseudomonas balearica</i> DSM 6083                                            | prophage/temperate/lysogenic | Yes | 28.0 |  | 1.0 |
| MSP1380 | haib17CEM4890 | H75CGCCXY_SL263712.135 | 46016 | no  | No  |                |                            | <i>Cronobacter sakazakii</i> SP291                                               | prophage/temperate/lysogenic | Yes | 22.0 |  | 0.0 |
| MSP1383 | haib17CEM5106 | HCVMTCCXY_SL269564.47  | 46004 | no  | No  |                |                            | <i>Atlantibacter hermanningii</i>                                                | prophage/temperate/lysogenic | Yes | 19.0 |  | 0.0 |
| MSP1382 | haib17KIU4866 | H7HJMCCXY_SL272768.88  | 46004 | no  | No  |                |                            | <i>Pseudomonas balearica</i> DSM 6083                                            | prophage/temperate/lysogenic | Yes | 13.0 |  | 1.0 |
| MSP1384 | haib17CEM4890 | HKC32ALXX_SL254711.90  | 45995 | yes | No  |                |                            | <i>Klebsiella pneumoniae</i>                                                     | virulent/lytic               | Yes | 14.0 |  | 1.0 |
| MSP1387 | haib17CEM4890 | H2NYMCCXY_SL254772.404 | 45987 | no  | No  |                |                            |                                                                                  | prophage/temperate/lysogenic | Yes | 7.0  |  | 0.0 |
| MSP1388 | haib17CEM4890 | H2NYMCCXY_SL254793.213 | 45981 | no  | Yes |                |                            | <i>Escherichia coli</i> HS                                                       | virulent/lytic               | Yes | 27.0 |  | 1.0 |
| MSP1389 | haib17CEM5106 | HCY5HCCXY_SL270943.58  | 45969 | no  | Yes |                |                            |                                                                                  | prophage/temperate/lysogenic | Yes | 20.0 |  | 0.0 |
| MSP1390 | haib17CEM4890 | H7KYMCCXY_SL273056.23  | 45968 | no  | No  |                |                            | <i>Yersinia pseudotuberculosis</i> YPIII                                         | prophage/temperate/lysogenic | Yes | 32.0 |  | 0.0 |
| MSP1391 | haib17CEM5241 | HMGHCCXY_SL343453.2    | 45952 | no  | No  |                |                            |                                                                                  | prophage/temperate/lysogenic | Yes | 33.0 |  | 0.0 |
| MSP1392 | haib17CEM5106 | HCV72CCXY_SL269733.210 | 45917 | no  | Yes |                |                            |                                                                                  | prophage/temperate/lysogenic | Yes | 32.0 |  | 0.0 |
| MSP1393 | haib17CEM5106 | HCY5HCCXY_SL271123.48  | 45916 | no  | Yes |                |                            |                                                                                  | virulent/lytic               | Yes | 32.0 |  | 0.0 |
| MSP1394 | haib17CEM4890 | H2NYMCCXY_SL254784.557 | 45910 | no  | Yes |                |                            |                                                                                  | virulent/lytic               | Yes | 18.0 |  | 0.0 |
| MSP1395 | haib17CEM4890 | H75CGCCXY_SL263714.119 | 45876 | no  | Yes |                |                            | <i>Desulfarculus baarsii</i> DSM 2075                                            | prophage/temperate/lysogenic | Yes | 26.0 |  | 0.0 |
| MSP1397 | haib17CEM4890 | HKC32ALXX_SL254716.164 | 45820 | no  | Yes |                |                            |                                                                                  | prophage/temperate/lysogenic | Yes | 13.0 |  | 0.0 |
| MSP1399 | haib17CEM4890 | H2NYMCCXY_SL254772.408 | 45779 | yes | No  |                |                            |                                                                                  | prophage/temperate/lysogenic | Yes | 22.0 |  | 0.0 |
| MSP1400 | haib17CEM4890 | H2NYMCCXY_SL254783.458 | 45764 | no  | Yes |                |                            | <i>Pectobacterium parmentieri</i>                                                | prophage/temperate/lysogenic | Yes | 31.0 |  | 0.0 |
| MSP1401 | haib17KIU4866 | H7HJMCCXY_SL272752.87  | 45760 | no  | No  |                |                            | <i>Alkalihalobacillus clausii</i>                                                | virulent/lytic               | Yes | 22.0 |  | 0.0 |
| MSP1402 | haib17CEM4890 | H7KYMCCXY_SL273060.58  | 45751 | no  | No  |                |                            |                                                                                  | virulent/lytic               | Yes | 22.0 |  | 0.0 |
| MSP1403 | haib17CEM5106 | HCV72CCXY_SL269754.288 | 45731 | no  | No  | Gordonia       | Gordonia terrae            |                                                                                  | prophage/temperate/lysogenic | Yes | 23.0 |  | 0.0 |
| MSP1404 | haib17CEM5106 | HCV72CCXY_SL269747.65  | 45727 | no  | Yes |                |                            |                                                                                  | virulent/lytic               | Yes | 18.0 |  | 0.0 |
| MSP1405 | haib18CEM5453 | HNHKFCXXY_SL345483.1   | 45698 | no  | Yes |                |                            |                                                                                  | prophage/temperate/lysogenic | Yes | 32.0 |  | 0.0 |
| MSP1406 | haib17CEM5106 | HCY5HCCXY_SL270960.46  | 45690 | yes | No  |                |                            | <i>Klebsiella pneumoniae</i> subsp. <i>pneumoniae</i>                            | virulent/lytic               | Yes | 21.0 |  | 1.0 |
| MSP1408 | haib17CEM4890 | H75CGCCXY_SL263652.253 | 45687 | no  | No  |                |                            |                                                                                  | prophage/temperate/lysogenic | Yes | 18.0 |  | 0.0 |
| MSP1409 | haib17DB4959  | H3MGVCCXY_SL259838.38  | 45650 | no  | Yes |                |                            | <i>Acidovorax avenae</i> subsp. <i>avenae</i> ATCC 19860                         | prophage/temperate/lysogenic | Yes | 21.0 |  | 0.0 |
| MSP1411 | haib17CEM4890 | H2NYMCCXY_SL254818.373 | 45641 | no  | No  |                |                            |                                                                                  | virulent/lytic               | Yes | 11.0 |  | 0.0 |
| MSP1412 | haib17CEM4890 | HMCJMCCXY_SL335783.70  | 45622 | no  | Yes |                |                            |                                                                                  | prophage/temperate/lysogenic | Yes | 32.0 |  | 0.0 |
| MSP1413 | haib17KIU4866 | H7HJMCCXY_SL272797.16  | 45595 | no  | No  |                |                            |                                                                                  | virulent/lytic               | Yes | 18.0 |  | 0.0 |
| MSP1414 | haib17KIU4866 | H7HJMCCXY_SL272775.76  | 45594 | no  | No  | Pseudomonas    | Pseudomonas aeruginosa     | <i>Pseudomonas chlororaphis</i> subsp. <i>aurantiaca</i>                         | prophage/temperate/lysogenic | Yes | 17.0 |  | 0.0 |
| MSP1415 | haib17CEM4890 | H2NYMCCXY_SL254771.296 | 45587 | no  | Yes |                |                            |                                                                                  | prophage/temperate/lysogenic | Yes | 33.0 |  | 0.0 |
| MSP1416 | haib17DB4959  | HMGW3CCXY_SL342474.13  | 45570 | no  | Yes |                |                            | <i>Rothia mucilaginosa</i>                                                       | prophage/temperate/lysogenic | No  | 32.0 |  | 1.0 |
| MSP1417 | haib17CEM4890 | H2NYMCCXY_SL254806.356 | 45569 | no  | No  |                |                            | <i>Cronobacter sakazakii</i> ES15                                                | prophage/temperate/lysogenic | Yes | 16.0 |  | 0.0 |
| MSP1418 | haib18CEM5332 | HK7G5CCXY_SL310979.6   | 45557 | no  | No  |                |                            |                                                                                  | virulent/lytic               | Yes | 11.0 |  | 0.0 |
| MSP1420 | haib17CEM4890 | H2NYMCCXY_SL254809.25  | 45543 | yes | No  |                |                            |                                                                                  | virulent/lytic               | Yes | 12.0 |  | 0.0 |
| MSP1419 | haib18CEM5453 | HMCJMCCXY_SL336349.2   | 45543 | yes | No  |                |                            |                                                                                  | virulent/lytic               | Yes | 3.0  |  | 0.0 |
| MSP1421 | haib17KIU4866 | HMCJMCCXY_SL335950.64  | 45542 | no  | No  |                |                            | <i>Pseudomonas stutzeri</i>                                                      | prophage/temperate/lysogenic | Yes | 22.0 |  | 1.0 |
| MSP1423 | haib17CEM4890 | H75CGCCXY_SL263650.123 | 45468 | no  | No  |                |                            |                                                                                  | prophage/temperate/lysogenic | Yes | 14.0 |  | 0.0 |
| MSP1424 | haib17CEM5106 | HCV72CCXY_SL269767.111 | 45452 | no  | Yes |                |                            |                                                                                  | prophage/temperate/lysogenic | Yes | 28.0 |  | 0.0 |
| MSP1425 | haib17CEM4890 | H2NYMCCXY_SL254787.3   | 45422 | no  | No  | Staphylococcus | Staphylococcus epidermidis | <i>Staphylococcus</i> sp. M0911                                                  | prophage/temperate/lysogenic | Yes | 20.0 |  | 0.0 |
| MSP1427 | haib17CEM4890 | H2NYMCCXY_SL254777.3   | 45405 | no  | No  |                |                            | <i>Propionibacterium acidifaciens</i>                                            | virulent/lytic               | No  | 33.0 |  | 0.0 |
| MSP1428 | haib18CEM5453 | HT5YVCCXY_SL357341.3   | 45385 | yes | No  |                |                            |                                                                                  | prophage/temperate/lysogenic | Yes | 16.0 |  | 0.0 |
| MSP1429 | haib17CEM5106 | HCV72CCXY_SL269793.80  | 45377 | no  | No  |                |                            |                                                                                  | prophage/temperate/lysogenic | Yes | 32.0 |  | 0.0 |
| MSP1432 | haib17CEM5106 | HCY5HCCXY_SL270948.133 | 45325 | no  | Yes |                |                            |                                                                                  | prophage/temperate/lysogenic | Yes | 28.0 |  | 0.0 |
| MSP1433 | haib18CEM5453 | HMC2KCCXY_SL336681.34  | 45324 | yes | No  | Arthrobacter   | None                       | <i>Micrococcus luteus</i>                                                        | virulent/lytic               | Yes | 31.0 |  | 0.0 |
| MSP1434 | haib17CEM5241 | HMGHCCXY_SL343467.1    | 45313 | yes | No  |                |                            |                                                                                  | prophage/temperate/lysogenic | Yes | 7.0  |  | 0.0 |

Table S1

|         |                                      |       |     |     |                  |                          |                                         |                              |     |      |  |     |
|---------|--------------------------------------|-------|-----|-----|------------------|--------------------------|-----------------------------------------|------------------------------|-----|------|--|-----|
| MSP1435 | haib17CEM5106_HCY5HCCXY_SL270939.36  | 45301 | no  | Yes | Lactococcus      | Lactococcus_garvieae     |                                         | prophage/temperate/lysogenic | Yes | 28.0 |  | 0.0 |
| MSP1436 | haib17CEM5106_HCVMTCCXY_SL269538.229 | 45298 | no  | Yes | Arthrobacter     | Arthrobacter_globiformis | Bifidobacterium_choerinum               | virulent/lytic               | Yes | 29.0 |  | 0.0 |
| MSP1438 | haib17CEM4890_HKC32ALXX_SL254681.362 | 45245 | no  | No  |                  |                          |                                         | prophage/temperate/lysogenic | Yes | 11.0 |  | 0.0 |
| MSP1439 | haib17CEM4890_HMCMJCCXY_SL335821.26  | 45219 | no  | No  |                  |                          | Micrococcus_luteus                      | prophage/temperate/lysogenic | Yes | 33.0 |  | 1.0 |
| MSP1440 | haib17KIU4866_H7HJMCCXY_SL272744.88  | 45211 | no  | No  |                  |                          |                                         | virulent/lytic               | Yes | 2.0  |  | 0.0 |
| MSP1441 | haib17CEM4890_H7KYMCCXY_SL273071.1   | 45207 | no  | No  |                  |                          | Serratia_plymuthica AS9                 | virulent/lytic               | Yes | 32.0 |  | 0.0 |
| MSP1442 | haib17CEM5106_HCY5HCCXY_SL270943.61  | 45204 | no  | Yes |                  |                          | Xanthomonas_campestris pv. raphani 756C | prophage/temperate/lysogenic | Yes | 20.0 |  | 1.0 |
| MSP1444 | haib17KIU4866_H7HJMCCXY_SL272816.132 | 45202 | no  | Yes | Stenotrophomonas | None                     |                                         | prophage/temperate/lysogenic | Yes | 32.0 |  | 0.0 |
| MSP1443 | haib17KIU4866_HMCMJCCXY_SL335947.120 | 45202 | no  | Yes |                  |                          | Dickeya_zeae NCPPB 3531                 | prophage/temperate/lysogenic | Yes | 20.0 |  | 0.0 |
| MSP1445 | haib18CEM5526_HMGTJCCXY_SL342642.9   | 45199 | no  | Yes |                  |                          | Vitreoscilla_filiformis                 | prophage/temperate/lysogenic | Yes | 32.0 |  | 0.0 |
| MSP1448 | haib17CEM5106_HCY5HCCXY_SL270908.42  | 45168 | no  | Yes | Paracoccus       | None                     |                                         | prophage/temperate/lysogenic | Yes | 11.0 |  | 0.0 |
| MSP1449 | haib17CEM4890_H2NYMCCXY_SL254770.295 | 45165 | no  | No  |                  |                          | Atlantibacter_hermannii                 | prophage/temperate/lysogenic | No  | 27.0 |  | 0.0 |
| MSP1450 | haib17KIU4866_H7HJMCCXY_SL272827.109 | 45149 | no  | Yes |                  |                          | Serratia_plymuthica AS9                 | prophage/temperate/lysogenic | No  | 32.0 |  | 0.0 |
| MSP1451 | haib17CEM4890_H2NYMCCXY_SL254830.368 | 45142 | no  | Yes |                  |                          |                                         | prophage/temperate/lysogenic | Yes | 20.0 |  | 0.0 |
| MSP1453 | haib17CEM4890_HKC32ALXX_SL254705.317 | 45135 | no  | Yes |                  |                          |                                         | virulent/lytic               | Yes | 29.0 |  | 0.0 |
| MSP1454 | haib17DB4959_H3MGVCCXY_SL259906.18   | 45130 | yes | No  |                  |                          | Micrococcus_luteus                      | prophage/temperate/lysogenic | Yes | 31.0 |  | 1.0 |
| MSP1456 | haib17CEM5106_HCV72CCXY_SL269723.62  | 45108 | no  | No  |                  |                          | Klebsiella_sp. PO552                    | prophage/temperate/lysogenic | No  | 28.0 |  | 0.0 |
| MSP1457 | haib17CEM4890_HKC32ALXX_SL254752.160 | 45086 | no  | Yes |                  |                          | Klebsiella_pneumoniae                   | prophage/temperate/lysogenic | No  | 25.0 |  | 1.0 |
| MSP1458 | haib17CEM4890_H2NYMCCXY_SL254828.105 | 45085 | no  | No  |                  |                          |                                         | prophage/temperate/lysogenic | Yes | 30.0 |  | 0.0 |
| MSP1459 | haib17KIU4866_H7HJMCCXY_SL272752.90  | 45082 | no  | Yes |                  |                          |                                         | prophage/temperate/lysogenic | Yes | 30.0 |  | 0.0 |
| MSP1460 | haib17CEM4890_H2NYMCCXY_SL254773.2   | 45004 | yes | No  | Staphylococcus   | Staphylococcus_aureus    | Staphylococcus_argenteus                | prophage/temperate/lysogenic | Yes | 20.0 |  | 0.0 |
| MSP1461 | haib17CEM4890_HKC32ALXX_SL254750.16  | 44982 | no  | No  |                  |                          | Corynebacterium_singularare             | prophage/temperate/lysogenic | Yes | 21.0 |  | 0.0 |
| MSP1462 | haib17CEM5106_HCY5JCCXY_SL269547.21  | 44980 | no  | Yes |                  |                          | Serratia_marcescens                     | prophage/temperate/lysogenic | No  | 27.0 |  | 0.0 |
| MSP1463 | haib17CEM5106_HCY5JCCXY_SL269530.40  | 44951 | yes | No  |                  |                          | Enterobacter_cloacae                    | prophage/temperate/lysogenic | Yes | 19.0 |  | 0.0 |
| MSP1466 | haib17KIU4866_H7HJMCCXY_SL272774.49  | 44949 | yes | No  |                  |                          | Pseudomonas_stutzeri A1501              | prophage/temperate/lysogenic | Yes | 21.0 |  | 1.0 |
| MSP1468 | haib17CEM5106_HCV72CCXY_SL269773.172 | 44918 | no  | No  |                  |                          |                                         | virulent/lytic               | Yes | 25.0 |  | 0.0 |
| MSP1469 | haib17KIU4866_H7HJMCCXY_SL272772.53  | 44903 | no  | Yes |                  |                          |                                         | prophage/temperate/lysogenic | Yes | 29.0 |  | 0.0 |
| MSP1470 | haib17CEM5106_HCY5JCCXY_SL269551.60  | 44889 | no  | Yes |                  |                          | Dickeya_zeae                            | prophage/temperate/lysogenic | Yes | 21.0 |  | 0.0 |
| MSP1472 | haib17CEM4890_HKC32ALXX_SL254722.43  | 44880 | no  | No  |                  |                          | Actinomyces_sp. oral taxon 897          | virulent/lytic               | Yes | 12.0 |  | 0.0 |
| MSP1473 | haib17CEM4890_H75CGCCXY_SL263652.262 | 44862 | no  | Yes |                  |                          |                                         | prophage/temperate/lysogenic | Yes | 16.0 |  | 0.0 |
| MSP1474 | haib17CEM4890_HKC32ALXX_SL254675.11  | 44852 | yes | No  |                  |                          |                                         | virulent/lytic               | Yes | 18.0 |  | 0.0 |
| MSP1475 | haib18CEM5453_HT5YVCCXY_SL357286.6   | 44850 | no  | No  |                  |                          |                                         | virulent/lytic               | Yes | 20.0 |  | 0.0 |
| MSP1476 | haib17CEM4890_H2NYMCCXY_SL254795.431 | 44845 | no  | Yes |                  |                          | Pseudomonas_balearica DSM 6083          | virulent/lytic               | Yes | 26.0 |  | 1.0 |
| MSP1477 | haib17CEM4890_HKC32ALXX_SL254698.16  | 44836 | yes | No  |                  |                          |                                         | prophage/temperate/lysogenic | No  | 19.0 |  | 0.0 |
| MSP1478 | haib17KIU4866_H7HJMCCXY_SL272752.92  | 44822 | no  | No  |                  |                          |                                         | virulent/lytic               | Yes | 28.0 |  | 0.0 |
| MSP1479 | haib17KIU4866_H7HJMCCXY_SL272832.138 | 44796 | no  | No  |                  |                          |                                         | prophage/temperate/lysogenic | Yes | 17.0 |  | 0.0 |
| MSP1480 | haib17KIU4866_H7HJMCCXY_SL272830.31  | 44769 | no  | Yes |                  |                          | Pseudomonas_aeruginosa                  | virulent/lytic               | Yes | 28.0 |  | 1.0 |
| MSP1482 | haib17CEM4890_H75CGCCXY_SL263651.82  | 44764 | no  | No  |                  |                          |                                         | virulent/lytic               | Yes | 4.0  |  | 0.0 |
| MSP1483 | haib17KIU4866_H7HJMCCXY_SL272824.106 | 44753 | no  | Yes |                  |                          | Pectobacterium_brasiliense              | prophage/temperate/lysogenic | No  | 26.0 |  | 0.0 |
| MSP1484 | haib17CEM4890_H2NYMCCXY_SL254782.286 | 44751 | no  | No  |                  |                          |                                         | prophage/temperate/lysogenic | Yes | 13.0 |  | 0.0 |
| MSP1485 | haib17KIU4866_HMCMJCCXY_SL335878.6   | 44747 | no  | No  |                  |                          |                                         | virulent/lytic               | Yes | 32.0 |  | 0.0 |
| MSP1487 | haib17KIU4866_H7HJMCCXY_SL272801.6   | 44726 | no  | No  |                  |                          |                                         | virulent/lytic               | Yes | 6.0  |  | 0.0 |
| MSP1489 | haib17CEM5106_HCVMTCCXY_SL269574.107 | 44721 | no  | No  |                  |                          |                                         | prophage/temperate/lysogenic | Yes | 32.0 |  | 0.0 |
| MSP1488 | haib17KIU4866_H7HJMCCXY_SL272776.146 | 44721 | yes | No  |                  |                          |                                         | prophage/temperate/lysogenic | Yes | 3.0  |  | 0.0 |
| MSP1490 | haib17CEM4890_H75CGCCXY_SL263640.181 | 44686 | no  | Yes |                  |                          | Delftia_sp. HK171                       | prophage/temperate/lysogenic | Yes | 26.0 |  | 0.0 |
| MSP1491 | haib17CEM4890_H2NYMCCXY_SL254796.344 | 44674 | no  | No  |                  |                          |                                         | prophage/temperate/lysogenic | Yes | 11.0 |  | 0.0 |
| MSP1492 | haib17KIU4866_HMCMJCCXY_SL335936.90  | 44661 | no  | Yes |                  |                          | Pluralibacter_gergoviae                 | virulent/lytic               | Yes | 17.0 |  | 0.0 |
| MSP1493 | haib17CEM4890_H2NYMCCXY_SL254847.55  | 44642 | yes | No  |                  |                          |                                         | virulent/lytic               | No  | 18.0 |  | 0.0 |
| MSP1494 | haib17CEM4890_HMCMJCCXY_SL335834.149 | 44630 | no  | No  |                  |                          |                                         | virulent/lytic               | Yes | 4.0  |  | 0.0 |
| MSP1495 | haib17CEM4890_HKC32ALXX_SL254752.162 | 44629 | no  | Yes |                  |                          | Escherichia_coli                        | prophage/temperate/lysogenic | Yes | 32.0 |  | 1.0 |
| MSP1496 | haib17CEM4890_H2NYMCCXY_SL254776.108 | 44619 | no  | No  |                  |                          | Pseudomonas_pseudoalcaligenes CECT 5344 | virulent/lytic               | No  | 15.0 |  | 0.0 |
| MSP1497 | haib18CEM5453_HMC2KCCXY_SL336736.6   | 44611 | no  | No  |                  |                          |                                         | prophage/temperate/lysogenic | Yes | 19.0 |  | 0.0 |
| MSP1498 | haib17DB4959_H3MGVCCXY_SL259896.5    | 44592 | yes | No  |                  |                          |                                         | prophage/temperate/lysogenic | Yes | 21.0 |  | 0.0 |
| MSP1500 | haib17CEM5106_HCY5HCCXY_SL270934.103 | 44591 | no  | Yes |                  |                          |                                         | prophage/temperate/lysogenic | Yes | 13.0 |  | 0.0 |
| MSP1501 | haib18CEM5332_HK7G5CCXY_SL311022.33  | 44580 | no  | No  |                  |                          |                                         | virulent/lytic               | Yes | 31.0 |  | 0.0 |
| MSP1502 | haib18CEM5453_HNHKFCCXY_SL346098.1   | 44568 | no  | No  |                  |                          |                                         | prophage/temperate/lysogenic | Yes | 28.0 |  | 0.0 |
| MSP1503 | haib17KIU4866_H7HJMCCXY_SL272820.45  | 44566 | no  | Yes |                  |                          | Clostridium_tyrobutyricum               | prophage/temperate/lysogenic | Yes | 6.0  |  | 0.0 |
| MSP1504 | haib17KIU4866_H7HJMCCXY_SL272826.222 | 44563 | no  | Yes |                  |                          | Desulfallas_gibsoniae DSM 7213          | prophage/temperate/lysogenic | Yes | 14.0 |  | 0.0 |
| MSP1505 | haib17CEM4890_H2NYMCCXY_SL254855.299 | 44560 | no  | No  |                  |                          |                                         | virulent/lytic               | Yes | 33.0 |  | 0.0 |
| MSP1506 | haib17CEM4890_HKC32ALXX_SL254746.44  | 44555 | no  | Yes |                  |                          | Pseudomonas_mendocina ymp               | virulent/lytic               | Yes | 22.0 |  | 0.0 |
| MSP1507 | haib17CEM5106_HCCGHCCXY_SL270438.10  | 44552 | no  | No  |                  |                          | Corynebacterium_singularare             | prophage/temperate/lysogenic | Yes | 24.0 |  | 0.0 |
| MSP1508 | haib17CEM4890_H2NYMCCXY_SL254807.249 | 44548 | no  | No  |                  |                          |                                         | prophage/temperate/lysogenic | Yes | 32.0 |  | 0.0 |
| MSP1509 | haib17CEM4890_H7KYMCCXY_SL273060.61  | 44531 | no  | No  |                  |                          |                                         | virulent/lytic               | Yes | 13.0 |  | 0.0 |
| MSP1510 | haib17KIU4866_H7HJMCCXY_SL272808.29  | 44522 | no  | No  |                  |                          |                                         | prophage/temperate/lysogenic | Yes | 30.0 |  | 0.0 |
| MSP1511 | haib17CEM4890_H2NYMCCXY_SL254843.542 | 44512 | no  | No  |                  |                          |                                         | prophage/temperate/lysogenic | Yes | 13.0 |  | 0.0 |
| MSP1512 | haib17KIU4866_H7HJMCCXY_SL272782.64  | 44457 | no  | No  |                  |                          |                                         | prophage/temperate/lysogenic | Yes | 10.0 |  | 0.0 |
| MSP1513 | haib17CEM4890_H2NYMCCXY_SL254818.393 | 44432 | no  | No  |                  |                          | Methylomicrobium_album BG8              | prophage/temperate/lysogenic | Yes | 22.0 |  | 0.0 |
| MSP1514 | haib17CEM4890_H3KHWCCXY_SL263369.1   | 44418 | yes | No  |                  |                          |                                         | virulent/lytic               | Yes | 2.0  |  | 0.0 |

Table S1

|         |                                      |       |     |     |                  |                              |                                                               |                              |     |      |     |
|---------|--------------------------------------|-------|-----|-----|------------------|------------------------------|---------------------------------------------------------------|------------------------------|-----|------|-----|
| MSP1515 | haib17KIU4866_H7HJMCCXY_SL272745.79  | 44392 | yes | No  | Xanthomonas      | None                         |                                                               | virulent/lytic               | Yes | 13.0 | 0.0 |
| MSP1516 | haib17CEM4890_H2NYMCCXY_SL254779.28  | 44381 | yes | No  | Staphylococcus   | Staphylococcus aureus        | Clostridioides difficile                                      | prophage/temperate/lysogenic | Yes | 32.0 | 0.0 |
| MSP1517 | haib17KIU4866_H7HJMCCXY_SL272759.75  | 44348 | no  | No  |                  |                              | Acinetobacter ursingii                                        | virulent/lytic               | Yes | 21.0 | 0.0 |
| MSP1521 | haib17CEM4890_H7KYMCCXY_SL273060.62  | 44310 | no  | No  | Streptomyces     | Streptomyces platensis       |                                                               | virulent/lytic               | Yes | 26.0 | 0.0 |
| MSP1522 | haib17KIU4866_H7HJMCCXY_SL272778.162 | 44303 | yes | No  |                  |                              | Rhodospirillum rubrum ATCC 11170                              | virulent/lytic               | Yes | 22.0 | 0.0 |
| MSP1526 | haib17CEM4890_H7KYMCCXY_SL273060.63  | 44277 | no  | No  | Streptomyces     | Streptomyces platensis       |                                                               | virulent/lytic               | Yes | 32.0 | 0.0 |
| MSP1527 | haib17KIU4866_H7HJMCCXY_SL272796.209 | 44248 | no  | Yes |                  |                              |                                                               | virulent/lytic               | No  | 32.0 | 0.0 |
| MSP1530 | haib17CEM4890_HKC32ALXX_SL254706.396 | 44221 | no  | No  | Pseudomonas      | Pseudomonas putida           | Pseudomonas stutzeri                                          | prophage/temperate/lysogenic | Yes | 23.0 | 0.0 |
| MSP1531 | haib17DB4959_H3MGVCCXY_SL259912.9    | 44197 | yes | No  |                  |                              |                                                               | virulent/lytic               | Yes | 5.0  | 0.0 |
| MSP1532 | haib17CEM4890_HKC32ALXX_SL254693.220 | 44191 | no  | Yes |                  |                              |                                                               | prophage/temperate/lysogenic | Yes | 14.0 | 0.0 |
| MSP1533 | haib17CEM4890_H2NYMCCXY_SL254832.68  | 44190 | no  | No  |                  |                              | Acinetobacter sp. ACNIH1                                      | prophage/temperate/lysogenic | Yes | 30.0 | 0.0 |
| MSP1534 | haib17CEM4890_H2NYMCCXY_SL254769.326 | 44186 | no  | No  |                  |                              | Kosakonia cowanii JCM 10956 = DSM 18146                       | prophage/temperate/lysogenic | Yes | 17.0 | 0.0 |
| MSP1535 | haib17KIU4866_H7HJMCCXY_SL272788.91  | 44184 | no  | Yes |                  |                              |                                                               | prophage/temperate/lysogenic | Yes | 27.0 | 0.0 |
| MSP1537 | haib17CEM5106_HCV72CCXY_SL269750.141 | 44171 | no  | Yes |                  |                              |                                                               | prophage/temperate/lysogenic | Yes | 33.0 | 0.0 |
| MSP1538 | haib17CEM4890_HMCMJCCXY_SL335851.11  | 44137 | no  | No  |                  |                              | Acinetobacter sp. LoGeW2-3                                    | prophage/temperate/lysogenic | Yes | 30.0 | 0.0 |
| MSP1539 | haib17CEM5106_HCY5HCCXY_SL270973.56  | 44120 | no  | Yes |                  |                              | Dickeya zeae                                                  | prophage/temperate/lysogenic | No  | 21.0 | 0.0 |
| MSP1540 | haib17CEM4890_H2NYMCCXY_SL254796.346 | 44097 | no  | Yes |                  |                              |                                                               | prophage/temperate/lysogenic | Yes | 12.0 | 0.0 |
| MSP1541 | haib17CEM5106_HCY5JCCXY_SL269571.124 | 44092 | no  | Yes |                  |                              |                                                               | prophage/temperate/lysogenic | Yes | 18.0 | 0.0 |
| MSP1542 | haib17CEM4890_HKC32ALXX_SL254765.200 | 44088 | yes | No  |                  |                              | Salmonella enterica subsp. enterica serovar Bergen str. ST350 | virulent/lytic               | Yes | 26.0 | 1.0 |
| MSP1543 | haib18CEM5453_HMGV3CCXY_SL342298.1   | 44086 | yes | No  |                  |                              |                                                               | virulent/lytic               | Yes | 19.0 | 0.0 |
| MSP1545 | haib17DB4959_H3MGVCCXY_SL259967.35   | 44049 | no  | Yes | Staphylococcus   | Staphylococcus epidermidis   |                                                               | prophage/temperate/lysogenic | No  | 27.0 | 1.0 |
| MSP1546 | haib17CEM4890_HKC32ALXX_SL254676.68  | 44024 | no  | No  |                  |                              |                                                               | virulent/lytic               | Yes | 22.0 | 0.0 |
| MSP1547 | haib17CEM4890_H2NYMCCXY_SL254829.318 | 44019 | no  | Yes |                  |                              |                                                               | virulent/lytic               | Yes | 9.0  | 0.0 |
| MSP1548 | haib17KIU4866_H7HJMCCXY_SL272751.109 | 44014 | no  | No  |                  |                              |                                                               | prophage/temperate/lysogenic | Yes | 2.0  | 0.0 |
| MSP1549 | haib17KIU4866_H7HJMCCXY_SL272796.210 | 44009 | no  | No  |                  |                              |                                                               | prophage/temperate/lysogenic | Yes | 31.0 | 0.0 |
| MSP1551 | haib17CEM5106_HCY5HCCXY_SL270959.311 | 43984 | no  | Yes |                  |                              | Acidipropionibacterium virtanenii                             | virulent/lytic               | Yes | 32.0 | 0.0 |
| MSP1553 | haib17CEM5106_HCVMTCCXY_SL269526.17  | 43973 | no  | Yes |                  |                              |                                                               | prophage/temperate/lysogenic | Yes | 18.0 | 0.0 |
| MSP1554 | haib17KIU4866_H7HJMCCXY_SL272747.82  | 43962 | no  | Yes | Escherichia      | Escherichia coli             | Dickeya zeae NCPPB 3532                                       | prophage/temperate/lysogenic | No  | 31.0 | 0.0 |
| MSP1556 | haib17CEM5106_HCY5HCCXY_SL270948.140 | 43909 | no  | Yes |                  |                              |                                                               | prophage/temperate/lysogenic | Yes | 30.0 | 0.0 |
| MSP1557 | haib17CEM4890_H2NYMCCXY_SL254796.352 | 43899 | no  | Yes |                  |                              |                                                               | prophage/temperate/lysogenic | Yes | 13.0 | 0.0 |
| MSP1558 | haib17CEM4890_H2NYMCCXY_SL254783.486 | 43883 | no  | No  |                  |                              |                                                               | virulent/lytic               | Yes | 11.0 | 0.0 |
| MSP1559 | haib17CEM4890_H2NYMCCXY_SL254855.306 | 43880 | no  | No  |                  |                              |                                                               | prophage/temperate/lysogenic | Yes | 9.0  | 0.0 |
| MSP1560 | haib17CEM5106_HCV72CCXY_SL269777.219 | 43879 | no  | No  | Gordonia         | Gordonia terrae              |                                                               | virulent/lytic               | Yes | 21.0 | 0.0 |
| MSP1561 | haib17CEM4890_H2NYMCCXY_SL254772.426 | 43843 | no  | Yes |                  |                              | Desulfotomaculum ferrireducens                                | prophage/temperate/lysogenic | Yes | 6.0  | 0.0 |
| MSP1562 | haib17CEM4890_H2NYMCCXY_SL254814.146 | 43836 | no  | No  |                  |                              |                                                               | prophage/temperate/lysogenic | Yes | 23.0 | 0.0 |
| MSP1563 | haib17CEM5106_HCCGHCCXY_SL270293.2   | 43827 | no  | No  |                  |                              |                                                               | prophage/temperate/lysogenic | Yes | 23.0 | 0.0 |
| MSP1564 | haib17CEM5241_HMGMHCCXY_SL343449.11  | 43799 | yes | No  |                  |                              |                                                               | virulent/lytic               | Yes | 16.0 | 0.0 |
| MSP1565 | haib17CEM5106_HCV72CCXY_SL269776.154 | 43788 | no  | Yes |                  |                              | Psychrobacter sp. P11F6                                       | prophage/temperate/lysogenic | Yes | 19.0 | 0.0 |
| MSP1566 | haib17CEM4890_H2NYMCCXY_SL254847.58  | 43783 | no  | No  |                  |                              | Actinomyces sp. oral taxon 414                                | virulent/lytic               | No  | 23.0 | 0.0 |
| MSP1567 | haib17CEM4890_H2NYMCCXY_SL254814.150 | 43762 | no  | No  |                  |                              |                                                               | prophage/temperate/lysogenic | Yes | 33.0 | 0.0 |
| MSP1568 | haib17CEM4890_HKC32ALXX_SL254764.303 | 43750 | no  | No  |                  |                              |                                                               | virulent/lytic               | Yes | 28.0 | 0.0 |
| MSP1569 | haib18CEM5453_HMC2KCCXY_SL336679.9   | 43746 | no  | No  |                  |                              |                                                               | virulent/lytic               | Yes | 14.0 | 0.0 |
| MSP1570 | haib17CEM4890_HKC32ALXX_SL254722.46  | 43705 | no  | No  |                  |                              |                                                               | prophage/temperate/lysogenic | Yes | 9.0  | 0.0 |
| MSP1571 | haib17CEM4890_H2NYMCCXY_SL254818.408 | 43692 | no  | No  |                  |                              | Klebsiella pneumoniae subsp. pneumoniae                       | prophage/temperate/lysogenic | Yes | 15.0 | 1.0 |
| MSP1572 | haib17CEM4890_H2NYMCCXY_SL254810.48  | 43666 | no  | No  | Staphylococcus   | Staphylococcus aureus        | Staphylococcus epidermidis                                    | prophage/temperate/lysogenic | No  | 28.0 | 0.0 |
| MSP1573 | haib17CEM4890_H2NYMCCXY_SL254858.26  | 43665 | yes | No  |                  |                              |                                                               | prophage/temperate/lysogenic | Yes | 6.0  | 0.0 |
| MSP1574 | haib17CEM4890_H2NYMCCXY_SL254807.255 | 43625 | no  | No  |                  |                              | Kosakonia cowanii JCM 10956 = DSM 18146                       | prophage/temperate/lysogenic | No  | 24.0 | 0.0 |
| MSP1575 | haib17CEM4890_H2NYMCCXY_SL254796.358 | 43623 | no  | Yes |                  |                              | Acinetobacter baumannii                                       | prophage/temperate/lysogenic | Yes | 28.0 | 1.0 |
| MSP1576 | haib17KIU4866_HMCMJCCXY_SL335936.96  | 43621 | yes | Yes |                  |                              |                                                               | prophage/temperate/lysogenic | No  | 18.0 | 0.0 |
| MSP1577 | haib17CEM5106_HCY5JCCXY_SL269554.74  | 43614 | no  | No  |                  |                              |                                                               | virulent/lytic               | Yes | 27.0 | 0.0 |
| MSP1578 | haib17CEM5106_HCV72CCXY_SL269748.339 | 43593 | no  | Yes | Pseudomonas      | Pseudomonas aeruginosa       |                                                               | prophage/temperate/lysogenic | Yes | 32.0 | 1.0 |
| MSP1579 | haib17CEM4890_HKC32ALXX_SL254681.373 | 43574 | no  | Yes | Faecalibacterium | Faecalibacterium prausnitzii |                                                               | prophage/temperate/lysogenic | Yes | 8.0  | 0.0 |
| MSP1580 | haib17CEM4890_HKC32ALXX_SL254764.304 | 43541 | no  | No  |                  |                              | Fusobacterium nucleatum subsp. polymorphum                    | prophage/temperate/lysogenic | Yes | 13.0 | 0.0 |
| MSP1581 | haib17KIU4866_H7HJMCCXY_SL272751.112 | 43501 | no  | No  |                  |                              | Acinetobacter sp. LoGeW2-3                                    | prophage/temperate/lysogenic | Yes | 25.0 | 0.0 |
| MSP1582 | haib17CEM5080_H7VL7CCXY_SL267266.56  | 43493 | no  | Yes |                  |                              | Enterococcus faecalis                                         | prophage/temperate/lysogenic | No  | 24.0 | 1.0 |
| MSP1583 | haib18CEM5332_HK7G5CCXY_SL310981.4   | 43474 | no  | No  |                  |                              |                                                               | virulent/lytic               | Yes | 24.0 | 0.0 |
| MSP1584 | haib18CEM5453_HMGV3CCXY_SL342609.169 | 43467 | no  | No  |                  |                              |                                                               | virulent/lytic               | Yes | 4.0  | 0.0 |
| MSP1585 | haib17CEM4890_HKC32ALXX_SL254722.47  | 43465 | no  | No  |                  |                              |                                                               | virulent/lytic               | Yes | 28.0 | 0.0 |
| MSP1586 | haib18CEM5453_HMC2KCCXY_SL336627.82  | 43450 | no  | No  |                  |                              |                                                               | prophage/temperate/lysogenic | Yes | 22.0 | 0.0 |
| MSP1587 | haib17KIU4866_H7HJMCCXY_SL272807.43  | 43449 | no  | No  |                  |                              | Atlantibacter hermannii                                       | virulent/lytic               | Yes | 15.0 | 0.0 |
| MSP1588 | haib17KIU4866_HMCMJCCXY_SL335961.32  | 43435 | no  | Yes |                  |                              |                                                               | prophage/temperate/lysogenic | Yes | 31.0 | 0.0 |
| MSP1589 | haib17KIU4866_H7HJMCCXY_SL272790.58  | 43427 | no  | Yes |                  |                              | Pseudomonas stutzeri                                          | prophage/temperate/lysogenic | Yes | 28.0 | 1.0 |
| MSP1590 | haib17CEM4890_H75CGCCXY_SL263714.132 | 43415 | no  | Yes |                  |                              |                                                               | prophage/temperate/lysogenic | Yes | 23.0 | 0.0 |
| MSP1591 | haib17CEM4890_H75CGCCXY_SL263638.41  | 43391 | no  | Yes |                  |                              | Desulfivibrio desulfuricans ND132                             | prophage/temperate/lysogenic | Yes | 20.0 | 0.0 |
| MSP1592 | haib17CEM4890_H2NYMCCXY_SL254837.43  | 43373 | no  | Yes |                  |                              | Pseudomonas balnearia DSM 6083                                | prophage/temperate/lysogenic | Yes | 33.0 | 1.0 |
| MSP1593 | haib17KIU4866_H7HJMCCXY_SL272759.78  | 43360 | no  | Yes |                  |                              |                                                               | prophage/temperate/lysogenic | Yes | 9.0  | 0.0 |
| MSP1594 | haib18CEM5453_HMGV3CCXY_SL342540.6   | 43349 | no  | No  |                  |                              | Thermaerobacter sp. FW80                                      | virulent/lytic               | Yes | 33.0 | 0.0 |
| MSP1595 | haib17CEM5106_HCV72CCXY_SL269761.109 | 43334 | yes | No  |                  |                              | Xanthomonas campestris pv. raphani 756C                       | prophage/temperate/lysogenic | Yes | 23.0 | 1.0 |

Table S1

|         |               |            |              |       |     |     |                          |                                         |                                                       |                              |     |      |  |     |
|---------|---------------|------------|--------------|-------|-----|-----|--------------------------|-----------------------------------------|-------------------------------------------------------|------------------------------|-----|------|--|-----|
| MSP1597 | haib17CEM5106 | HCY5HCCXY  | SL270948.146 | 43279 | no  | Yes |                          |                                         | <i>Pseudomonas aeruginosa</i> SCV20265                | virulent/lytic               | Yes | 29.0 |  | 1.0 |
| MSP1598 | haib17CEM5106 | HCV72CCXY  | SL269717.113 | 43266 | no  | Yes |                          |                                         | <i>Pseudomonas balearica</i> DSM 6083                 | prophage/temperate/lysogenic | Yes | 29.0 |  | 1.0 |
| MSP1599 | haib17CEM4890 | H2NYMCCXY  | SL254771.320 | 43252 | no  | No  |                          |                                         |                                                       | prophage/temperate/lysogenic | Yes | 32.0 |  | 0.0 |
| MSP1600 | haib17CEM5106 | HCV72CCXY  | SL269754.302 | 43244 | no  | No  |                          |                                         |                                                       | prophage/temperate/lysogenic | Yes | 10.0 |  | 0.0 |
| MSP1602 | haib17CEM4890 | H2NYMCCXY  | SL254818.418 | 43239 | no  | Yes |                          |                                         | <i>Caldicellulosiruptor kronotskysensis</i> 2002      | prophage/temperate/lysogenic | Yes | 8.0  |  | 0.0 |
| MSP1601 | haib17CEM5106 | HCY5HCCXY  | SL270945.91  | 43239 | no  | Yes |                          |                                         | <i>Pseudomonas chlororaphis</i>                       | prophage/temperate/lysogenic | Yes | 22.0 |  | 0.0 |
| MSP1604 | haib17CEM4890 | H2NYMCCXY  | SL254804.50  | 43236 | no  | Yes |                          |                                         |                                                       | virulent/lytic               | Yes | 13.0 |  | 0.0 |
| MSP1603 | haib18CEM5453 | HMC2KCCXY  | SL336697.36  | 43236 | no  | No  |                          |                                         |                                                       | virulent/lytic               | Yes | 28.0 |  | 0.0 |
| MSP1605 | haib17CEM4890 | H2NYMCCXY  | SL254818.419 | 43212 | no  | No  |                          |                                         |                                                       | prophage/temperate/lysogenic | Yes | 10.0 |  | 0.0 |
| MSP1606 | haib17CEM4890 | H2NYMCCXY  | SL254854.237 | 43192 | no  | No  |                          |                                         | <i>Pseudomonas balearica</i> DSM 6083                 | prophage/temperate/lysogenic | Yes | 21.0 |  | 1.0 |
| MSP1607 | haib17CEM4890 | HKC32ALXX  | SL254681.374 | 43187 | no  | No  |                          |                                         |                                                       | prophage/temperate/lysogenic | Yes | 13.0 |  | 0.0 |
| MSP1608 | haib17CEM4890 | H2NYMCCXY  | SL254781.494 | 43179 | no  | No  |                          |                                         |                                                       | prophage/temperate/lysogenic | Yes | 7.0  |  | 0.0 |
| MSP1609 | haib17CEM5241 | HMGHCCXY   | SL343449.12  | 43151 | no  | No  |                          |                                         | <i>Klebsiella variicola</i>                           | virulent/lytic               | Yes | 14.0 |  | 0.0 |
| MSP1610 | haib17CEM4890 | HKC32ALXX  | SL254723.4   | 43140 | no  | No  |                          | <i>Staphylococcus</i>                   | <i>Staphylococcus aureus</i>                          | prophage/temperate/lysogenic | No  | 27.0 |  | 0.0 |
| MSP1611 | haib17CEM5106 | HCVMTCCXY  | SL269554.57  | 43138 | no  | No  |                          |                                         | <i>Chlorobium limicola</i> DSM 245                    | virulent/lytic               | Yes | 6.0  |  | 0.0 |
| MSP1612 | haib18CEM5453 | HMC2KCCXY  | SL336650.34  | 43135 | no  | No  |                          |                                         |                                                       | virulent/lytic               | Yes | 33.0 |  | 0.0 |
| MSP1613 | haib17CEM5106 | HCCGHCCXY  | SL270411.20  | 43132 | no  | No  |                          |                                         |                                                       | virulent/lytic               | Yes | 30.0 |  | 0.0 |
| MSP1614 | haib17CEM4890 | H2NYMCCXY  | SL254794.631 | 43097 | no  | No  |                          |                                         | <i>Klebsiella pneumoniae</i>                          | prophage/temperate/lysogenic | Yes | 22.0 |  | 1.0 |
| MSP1615 | haib17KIU4866 | H7HJMCCXY  | SL272830.36  | 43084 | yes | No  |                          |                                         | <i>Xanthomonas campestris</i> pv. <i>raphani</i> 756C | virulent/lytic               | Yes | 21.0 |  | 1.0 |
| MSP1616 | haib17CEM4890 | H2NYMCCXY  | SL254806.394 | 43071 | yes | No  |                          |                                         | <i>Pseudomonas stutzeri</i>                           | prophage/temperate/lysogenic | Yes | 19.0 |  | 1.0 |
| MSP1617 | haib18CEM5453 | HNHKFCXY   | SL345575.26  | 43070 | no  | Yes |                          |                                         |                                                       | virulent/lytic               | Yes | 2.0  |  | 0.0 |
| MSP1618 | haib17CEM4890 | H3HKWCCXY  | SL263364.2   | 43062 | no  | No  |                          |                                         |                                                       | virulent/lytic               | Yes | 4.0  |  | 0.0 |
| MSP1619 | haib17CEM4890 | HKC32ALXX  | SL254747.69  | 43051 | no  | No  |                          |                                         | <i>Cutibacterium granulosum</i>                       | prophage/temperate/lysogenic | No  | 32.0 |  | 1.0 |
| MSP1620 | haib17CEM5106 | HCV72CCXY  | SL269747.69  | 43048 | no  | Yes |                          |                                         |                                                       | prophage/temperate/lysogenic | Yes | 24.0 |  | 0.0 |
| MSP1621 | haib17CEM5106 | HCCGHCCXY  | SL270547.1   | 43027 | yes | No  |                          |                                         | <i>Micrococcus luteus</i>                             | prophage/temperate/lysogenic | Yes | 29.0 |  | 1.0 |
| MSP1622 | haib17CEM4890 | HKC32ALXX  | SL254680.299 | 43026 | no  | No  |                          |                                         |                                                       | prophage/temperate/lysogenic | Yes | 22.0 |  | 0.0 |
| MSP1623 | haib17CEM4890 | HKC32ALXX  | SL254718.266 | 43023 | no  | No  |                          |                                         |                                                       | prophage/temperate/lysogenic | Yes | 12.0 |  | 0.0 |
| MSP1624 | haib17CEM4890 | H2NYMCCXY  | SL254784.607 | 43002 | yes | No  | <i>Faecalibacterium</i>  | <i>Faecalibacterium prausnitzii</i>     | <i>Desulfofundulus kuznetsovii</i> DSM 6115           | virulent/lytic               | Yes | 9.0  |  | 0.0 |
| MSP1625 | haib17CEM4890 | HMCMIJCCXY | SL335773.49  | 42969 | no  | No  | <i>Staphylococcus</i>    | <i>Staphylococcus aureus</i>            |                                                       | prophage/temperate/lysogenic | No  | 23.0 |  | 1.0 |
| MSP1626 | haib17CEM5106 | HCY5HCCXY  | SL270924.102 | 42955 | yes | No  |                          |                                         |                                                       | virulent/lytic               | Yes | 32.0 |  | 0.0 |
| MSP1627 | haib17CEM5106 | HCV72CCXY  | SL269773.182 | 42941 | no  | Yes |                          |                                         | <i>Enterobacter hormacchei</i> subsp. <i>oharae</i>   | prophage/temperate/lysogenic | No  | 33.0 |  | 0.0 |
| MSP1629 | haib17CEM4890 | HKC32ALXX  | SL254677.9   | 42931 | no  | Yes |                          |                                         |                                                       | virulent/lytic               | Yes | 23.0 |  | 0.0 |
| MSP1630 | haib17CEM4890 | H2NYMCCXY  | SL254793.240 | 42930 | no  | No  |                          |                                         |                                                       | prophage/temperate/lysogenic | Yes | 12.0 |  | 0.0 |
| MSP1631 | haib17CEM5106 | HCY5HCCXY  | SL270932.76  | 42917 | no  | No  |                          |                                         |                                                       | prophage/temperate/lysogenic | Yes | 26.0 |  | 0.0 |
| MSP1632 | haib17CEM4890 | H2NYMCCXY  | SL254857.9   | 42893 | yes | No  |                          |                                         | <i>Xenorhabdus doucetiae</i>                          | prophage/temperate/lysogenic | No  | 19.0 |  | 0.0 |
| MSP1633 | haib17CEM5106 | HCY5JCCXY  | SL269596.176 | 42879 | no  | Yes |                          |                                         |                                                       | prophage/temperate/lysogenic | No  | 27.0 |  | 0.0 |
| MSP1634 | haib17CEM4890 | H2NYMCCXY  | SL254830.397 | 42877 | no  | Yes | <i>Enterobacter</i>      | None                                    | <i>Klebsiella pneumoniae</i>                          | prophage/temperate/lysogenic | No  | 25.0 |  | 0.0 |
| MSP1635 | haib17KIU4866 | H7HJMCCXY  | SL272787.39  | 42864 | no  | No  | <i>Bacillus</i>          | None                                    |                                                       | prophage/temperate/lysogenic | Yes | 16.0 |  | 0.0 |
| MSP1636 | haib17KIU4866 | HMCMIJCCXY | SL335940.102 | 42844 | no  | Yes |                          |                                         | <i>Aquitalea magnusonii</i>                           | virulent/lytic               | Yes | 26.0 |  | 0.0 |
| MSP1637 | haib17KIU4866 | HMCMIJCCXY | SL335954.28  | 42842 | no  | No  |                          |                                         | <i>Pectobacterium versatile</i>                       | prophage/temperate/lysogenic | Yes | 16.0 |  | 0.0 |
| MSP1638 | haib18CEM5453 | HMGW3CCXY  | SL342530.13  | 42837 | no  | No  |                          |                                         |                                                       | virulent/lytic               | Yes | 32.0 |  | 0.0 |
| MSP1639 | haib17CEM5106 | HCY5JCCXY  | SL269596.177 | 42825 | yes | No  |                          |                                         |                                                       | prophage/temperate/lysogenic | Yes | 14.0 |  | 0.0 |
| MSP1642 | haib17KIU4866 | H7HJMCCXY  | SL272773.205 | 42805 | yes | No  |                          |                                         |                                                       | prophage/temperate/lysogenic | Yes | 9.0  |  | 0.0 |
| MSP1644 | haib17CEM4890 | H2NYMCCXY  | SL254783.499 | 42781 | no  | No  |                          |                                         |                                                       | prophage/temperate/lysogenic | Yes | 7.0  |  | 0.0 |
| MSP1645 | haib17CEM4890 | H75CGCCXY  | SL263686.42  | 42772 | no  | Yes |                          |                                         | <i>Acinetobacter</i> sp. <i>WCHA45</i>                | prophage/temperate/lysogenic | Yes | 28.0 |  | 0.0 |
| MSP1646 | haib17CEM5106 | HCY5JCCXY  | SL269565.52  | 42761 | no  | Yes |                          |                                         |                                                       | prophage/temperate/lysogenic | Yes | 29.0 |  | 0.0 |
| MSP1647 | haib18CEM5453 | HMGW3CCXY  | SL342282.4   | 42752 | yes | No  |                          |                                         |                                                       | virulent/lytic               | Yes | 7.0  |  | 0.0 |
| MSP1649 | haib17CEM4890 | H75CGCCXY  | SL263689.146 | 42750 | no  | Yes |                          |                                         |                                                       | prophage/temperate/lysogenic | Yes | 27.0 |  | 0.0 |
| MSP1650 | haib18CEM5453 | HMGW3CCXY  | SL342295.6   | 42735 | no  | No  | <i>Propionibacterium</i> | <i>Propionibacterium freudenreichii</i> |                                                       | virulent/lytic               | Yes | 31.0 |  | 0.0 |
| MSP1651 | haib17CEM4890 | H2NYMCCXY  | SL254781.500 | 42714 | no  | Yes |                          |                                         |                                                       | prophage/temperate/lysogenic | Yes | 14.0 |  | 0.0 |
| MSP1652 | haib17CEM4890 | H75CGCCXY  | SL263641.151 | 42698 | no  | Yes |                          |                                         | <i>Dickeya</i> sp. <i>CSL RW240</i>                   | virulent/lytic               | Yes | 30.0 |  | 0.0 |
| MSP1653 | haib17KIU4866 | H7HJMCCXY  | SL272792.38  | 42667 | no  | Yes |                          |                                         | <i>Dickeya chrysanthemi</i> Ech1591                   | virulent/lytic               | No  | 31.0 |  | 0.0 |
| MSP1654 | haib17KIU4866 | H7HJMCCXY  | SL272754.28  | 42648 | no  | No  |                          |                                         | <i>Acinetobacter radioresistens</i>                   | prophage/temperate/lysogenic | Yes | 28.0 |  | 0.0 |
| MSP1657 | haib17CEM4890 | H2NYMCCXY  | SL254784.618 | 42589 | yes | No  |                          |                                         |                                                       | virulent/lytic               | No  | 14.0 |  | 0.0 |
| MSP1659 | haib17CEM4890 | HKC32ALXX  | SL254763.120 | 42585 | no  | Yes |                          |                                         |                                                       | prophage/temperate/lysogenic | Yes | 13.0 |  | 0.0 |
| MSP1660 | haib17CEM4890 | H2NYMCCXY  | SL254825.28  | 42579 | no  | No  |                          |                                         |                                                       | virulent/lytic               | Yes | 12.0 |  | 0.0 |
| MSP1661 | haib17CEM4890 | H2NYMCCXY  | SL254770.328 | 42578 | no  | Yes |                          |                                         | <i>Cedecea lapagei</i>                                | prophage/temperate/lysogenic | No  | 21.0 |  | 0.0 |
| MSP1662 | haib17DB4959  | H3MGVCCXY  | SL259989.58  | 42566 | no  | No  | <i>Staphylococcus</i>    | <i>Staphylococcus epidermidis</i>       |                                                       | prophage/temperate/lysogenic | No  | 29.0 |  | 1.0 |
| MSP1664 | haib17CEM5106 | HCV72CCXY  | SL269798.188 | 42553 | no  | No  |                          |                                         |                                                       | prophage/temperate/lysogenic | Yes | 31.0 |  | 0.0 |
| MSP1666 | haib17CEM4890 | HKC32ALXX  | SL254749.7   | 42540 | yes | No  |                          |                                         | <i>Propionibacterium australiense</i>                 | prophage/temperate/lysogenic | No  | 26.0 |  | 0.0 |
| MSP1667 | haib18CEM5453 | HNHKFCXY   | SL345538.111 | 42522 | no  | No  |                          |                                         |                                                       | prophage/temperate/lysogenic | Yes | 13.0 |  | 0.0 |
| MSP1668 | haib17CEM5106 | HCV72CCXY  | SL269757.99  | 42521 | no  | Yes |                          |                                         |                                                       | virulent/lytic               | Yes | 29.0 |  | 0.0 |
| MSP1669 | haib17CEM4890 | H2NYMCCXY  | SL254783.501 | 42519 | no  | No  |                          |                                         |                                                       | virulent/lytic               | Yes | 11.0 |  | 0.0 |
| MSP1670 | haib17CEM5106 | HCCGHCCXY  | SL270289.1   | 42491 | no  | No  |                          |                                         |                                                       | virulent/lytic               | Yes | 19.0 |  | 0.0 |
| MSP1671 | haib17CEM5106 | HCV72CCXY  | SL269806.166 | 42488 | no  | No  | <i>Gordonia</i>          | <i>Gordonia terrae</i>                  | <i>Propionibacterium australiense</i>                 | prophage/temperate/lysogenic | Yes | 21.0 |  | 0.0 |
| MSP1672 | haib17CEM4890 | HKC32ALXX  | SL254763.121 | 42482 | no  | No  |                          |                                         |                                                       | prophage/temperate/lysogenic | Yes | 22.0 |  | 0.0 |
| MSP1673 | haib18CEM5453 | HMC2KCCXY  | SL336764.29  | 42477 | no  | No  |                          |                                         |                                                       | prophage/temperate/lysogenic | Yes | 33.0 |  | 0.0 |
| MSP1674 | haib17CEM4890 | HKC32ALXX  | SL254705.336 | 42471 | yes | No  | <i>Faecalibacterium</i>  | <i>Faecalibacterium prausnitzii</i>     |                                                       | prophage/temperate/lysogenic | Yes | 11.0 |  | 0.0 |



Table S1

|         |                                      |       |     |     |                |                                                       |                              |     |      |     |
|---------|--------------------------------------|-------|-----|-----|----------------|-------------------------------------------------------|------------------------------|-----|------|-----|
| MSP1676 | haib17CEM4890_H2NYMCCXY_SL254807.263 | 42465 | no  | No  |                |                                                       | prophage/temperate/lysogenic | Yes | 4.0  | 0.0 |
| MSP1677 | haib17KIU4866_H7HJMCCXY_SL272759.79  | 42458 | no  | Yes |                |                                                       | prophage/temperate/lysogenic | Yes | 7.0  | 0.0 |
| MSP1678 | haib17CEM5106_HCY5HCCXY_SL270917.263 | 42452 | no  | No  |                |                                                       | virulent/lytic               | Yes | 21.0 | 0.0 |
| MSP1680 | haib17CEM4890_HKC32ALXX_SL254764.312 | 42445 | no  | No  |                | <i>Pseudomonas balearica</i> DSM 6083                 | prophage/temperate/lysogenic | Yes | 19.0 | 1.0 |
| MSP1681 | haib17CEM4890_H2NYMCCXY_SL254843.572 | 42431 | no  | Yes |                |                                                       | prophage/temperate/lysogenic | Yes | 12.0 | 0.0 |
| MSP1682 | haib17CEM4890_HKC32ALXX_SL254685.6   | 42430 | yes | No  |                |                                                       | virulent/lytic               | Yes | 21.0 | 0.0 |
| MSP1683 | haib17CEM4890_H2NYMCCXY_SL254827.40  | 42429 | yes | No  | Arthrobacter   | <i>Arthrobacter globiformis</i>                       | virulent/lytic               | Yes | 27.0 | 0.0 |
| MSP1684 | haib17CEM4890_HKC32ALXX_SL254705.338 | 42428 | no  | No  |                | <i>Bacillus pseudomycoloides</i> DSM 12442            | prophage/temperate/lysogenic | Yes | 19.0 | 0.0 |
| MSP1685 | haib17CEM4890_H2NYMCCXY_SL254859.4   | 42386 | yes | No  |                | <i>Actinomyces qiguomingii</i>                        | virulent/lytic               | Yes | 24.0 | 0.0 |
| MSP1686 | haib17CEM4890_HKC32ALXX_SL254728.358 | 42371 | no  | Yes |                | <i>Clostridium chauvoei</i>                           | prophage/temperate/lysogenic | Yes | 32.0 | 0.0 |
| MSP1687 | haib17CEM4890_H2NYMCCXY_SL254838.110 | 42335 | no  | Yes |                | <i>Serratia plymuthica</i> AS9                        | prophage/temperate/lysogenic | Yes | 27.0 | 0.0 |
| MSP1689 | haib17CEM4890_H2NYMCCXY_SL254781.502 | 42310 | no  | No  |                |                                                       | virulent/lytic               | Yes | 11.0 | 0.0 |
| MSP1691 | haib17KIU4866_H7HJMCCXY_SL272827.113 | 42292 | no  | No  |                |                                                       | prophage/temperate/lysogenic | Yes | 31.0 | 0.0 |
| MSP1692 | haib17CEM4890_HMCMJCCXY_SL335833.200 | 42261 | no  | Yes |                |                                                       | virulent/lytic               | Yes | 15.0 | 0.0 |
| MSP1693 | haib17CEM4890_H75CGCCXY_SL263724.109 | 42260 | no  | Yes |                | <i>Acinetobacter radioresistens</i>                   | prophage/temperate/lysogenic | Yes | 30.0 | 0.0 |
| MSP1694 | haib17CEM5106_HCY5JCCXY_SL269586.81  | 42234 | no  | Yes |                | <i>Pseudomonas aeruginosa</i> SCV20265                | prophage/temperate/lysogenic | Yes | 30.0 | 1.0 |
| MSP1695 | haib17CEM4890_H2NYMCCXY_SL254818.438 | 42231 | no  | Yes |                |                                                       | virulent/lytic               | Yes | 2.0  | 0.0 |
| MSP1696 | haib17CEM4890_H75CGCCXY_SL263700.166 | 42218 | no  | No  |                |                                                       | virulent/lytic               | Yes | 33.0 | 0.0 |
| MSP1697 | haib17CEM5106_HCY5HCCXY_SL271153.2   | 42181 | no  | Yes |                |                                                       | virulent/lytic               | Yes | 21.0 | 0.0 |
| MSP1698 | haib17KIU4866_H7HJMCCXY_SL272742.15  | 42176 | no  | Yes |                | <i>Kosakonia cowanii</i> JCM 10956 = DSM 18146        | prophage/temperate/lysogenic | No  | 28.0 | 0.0 |
| MSP1699 | haib17CEM4890_H7KYMCCXY_SL273067.63  | 42174 | no  | No  | Staphylococcus | <i>Staphylococcus aureus</i>                          | prophage/temperate/lysogenic | No  | 26.0 | 1.0 |
| MSP1700 | haib17CEM5106_HCY5HCCXY_SL270906.101 | 42170 | no  | No  |                |                                                       | virulent/lytic               | Yes | 24.0 | 0.0 |
| MSP1701 | haib17DB4959_H3MGVCCXY_SL259838.43   | 42164 | yes | No  |                |                                                       | prophage/temperate/lysogenic | Yes | 24.0 | 0.0 |
| MSP1702 | haib17CEM4890_HKC32ALXX_SL254728.361 | 42151 | no  | Yes |                |                                                       | virulent/lytic               | Yes | 14.0 | 0.0 |
| MSP1703 | haib17CEM4890_H2NYMCCXY_SL254795.480 | 42140 | yes | No  |                |                                                       | virulent/lytic               | Yes | 10.0 | 0.0 |
| MSP1704 | haib17CEM5106_HCY5HCCXY_SL270946.26  | 42138 | no  | No  |                |                                                       | virulent/lytic               | Yes | 16.0 | 0.0 |
| MSP1705 | haib17CEM4890_H2NYMCCXY_SL254852.154 | 42121 | no  | No  |                | <i>Staphylococcus pseudintermedius</i>                | prophage/temperate/lysogenic | Yes | 18.0 | 0.0 |
| MSP1706 | haib17KIU4866_H7HJMCCXY_SL272821.74  | 42117 | no  | Yes |                | <i>Pseudomonas stutzeri</i> A1501                     | prophage/temperate/lysogenic | Yes | 18.0 | 1.0 |
| MSP1708 | haib17KIU4866_HMCMJCCXY_SL335963.88  | 42096 | yes | No  |                | <i>Acinetobacter radioresistens</i>                   | prophage/temperate/lysogenic | Yes | 31.0 | 0.0 |
| MSP1709 | haib18CEM5332_HK7G5CCXY_SL310952.4   | 42077 | no  | Yes |                |                                                       | prophage/temperate/lysogenic | Yes | 33.0 | 0.0 |
| MSP1710 | haib17CEM5106_HCV72CCXY_SL269747.72  | 42076 | no  | Yes |                |                                                       | prophage/temperate/lysogenic | Yes | 20.0 | 0.0 |
| MSP1711 | haib17CEM4890_HKC32ALXX_SL254757.3   | 42065 | no  | No  |                |                                                       | prophage/temperate/lysogenic | Yes | 8.0  | 0.0 |
| MSP1712 | haib18CEM5332_HK7G5CCXY_SL311016.57  | 42044 | no  | Yes |                |                                                       | virulent/lytic               | Yes | 31.0 | 0.0 |
| MSP1713 | haib17CEM5106_HCVMTCCXY_SL256929.50  | 42040 | no  | No  |                |                                                       | prophage/temperate/lysogenic | Yes | 14.0 | 0.0 |
| MSP1714 | haib17CEM4890_H2NYMCCXY_SL254828.116 | 42038 | yes | No  | Staphylococcus | <i>Staphylococcus epidermidis</i>                     | prophage/temperate/lysogenic | Yes | 26.0 | 1.0 |
| MSP1715 | haib17KIU4866_H7HJMCCXY_SL272792.39  | 42008 | no  | No  |                |                                                       | virulent/lytic               | Yes | 20.0 | 0.0 |
| MSP1716 | haib17CEM4890_H2NYMCCXY_SL254795.482 | 41963 | no  | Yes |                | <i>Desulfovibrio desulfuricans</i> ND132              | prophage/temperate/lysogenic | Yes | 29.0 | 0.0 |
| MSP1717 | haib17CEM4890_H2NYMCCXY_SL254855.327 | 41954 | no  | No  |                |                                                       | prophage/temperate/lysogenic | Yes | 20.0 | 0.0 |
| MSP1718 | haib17CEM4890_HKC32ALXX_SL254694.160 | 41952 | no  | No  | Bacillus       | <i>Bacillus anthracis</i>                             | prophage/temperate/lysogenic | Yes | 12.0 | 0.0 |
| MSP1719 | haib17CEM4890_H2NYMCCXY_SL254830.406 | 41946 | no  | Yes |                | <i>Salmonella enterica</i> subsp. <i>salamae</i>      | virulent/lytic               | Yes | 22.0 | 1.0 |
| MSP1720 | haib17CEM4890_H2NYMCCXY_SL254777.6   | 41939 | yes | No  | Staphylococcus | <i>Staphylococcus epidermidis</i>                     | prophage/temperate/lysogenic | Yes | 18.0 | 1.0 |
| MSP1721 | haib17CEM4890_H2NYMCCXY_SL254827.42  | 41935 | yes | No  |                |                                                       | prophage/temperate/lysogenic | Yes | 20.0 | 0.0 |
| MSP1722 | haib17CEM4890_HKC32ALXX_SL254742.403 | 41933 | no  | Yes |                |                                                       | prophage/temperate/lysogenic | Yes | 11.0 | 0.0 |
| MSP1723 | haib17KIU4866_H7HJMCCXY_SL272822.93  | 41924 | no  | No  |                | <i>Kosakonia cowanii</i> JCM 10956 = DSM 18146        | virulent/lytic               | Yes | 19.0 | 0.0 |
| MSP1724 | haib17CEM4890_H2NYMCCXY_SL254860.46  | 41916 | yes | No  |                |                                                       | prophage/temperate/lysogenic | Yes | 19.0 | 0.0 |
| MSP1725 | haib17CEM4890_H2NYMCCXY_SL254846.65  | 41915 | no  | No  |                |                                                       | prophage/temperate/lysogenic | Yes | 33.0 | 0.0 |
| MSP1726 | haib17CEM4890_H2NYMCCXY_SL254818.445 | 41912 | no  | No  |                |                                                       | virulent/lytic               | Yes | 8.0  | 0.0 |
| MSP1727 | haib17KIU4866_H7HJMCCXY_SL272752.101 | 41904 | no  | No  |                |                                                       | virulent/lytic               | Yes | 19.0 | 0.0 |
| MSP1728 | haib17CEM4890_HKC32ALXX_SL254758.11  | 41901 | yes | No  |                | <i>Microbacterium hominis</i>                         | virulent/lytic               | Yes | 17.0 | 0.0 |
| MSP1729 | haib17CEM4890_H2NYMCCXY_SL254824.56  | 41887 | no  | No  |                |                                                       | prophage/temperate/lysogenic | Yes | 10.0 | 0.0 |
| MSP1730 | haib17CEM4890_HKC32ALXX_SL254697.7   | 41880 | no  | No  |                |                                                       | prophage/temperate/lysogenic | Yes | 4.0  | 0.0 |
| MSP1731 | haib17CEM4890_H2NYMCCXY_SL254825.31  | 41877 | yes | No  |                |                                                       | prophage/temperate/lysogenic | Yes | 7.0  | 0.0 |
| MSP1732 | haib17CEM4890_HKC32ALXX_SL254764.319 | 41876 | yes | No  |                |                                                       | prophage/temperate/lysogenic | Yes | 9.0  | 0.0 |
| MSP1733 | haib18CEM5332_HK7G5CCXY_SL311009.21  | 41873 | yes | No  |                |                                                       | prophage/temperate/lysogenic | Yes | 4.0  | 0.0 |
| MSP1735 | haib18CEM5453_HNHKFCXY_SL346109.37   | 41872 | no  | No  |                |                                                       | virulent/lytic               | Yes | 31.0 | 0.0 |
| MSP1734 | haib18CEM5453_H75YVCCXY_SL357298.1   | 41872 | yes | No  |                |                                                       | virulent/lytic               | Yes | 22.0 | 0.0 |
| MSP1736 | haib17CEM5106_HCY5HCCXY_SL270948.155 | 41870 | no  | Yes |                | <i>Azospirillum ramasamyi</i>                         | prophage/temperate/lysogenic | Yes | 28.0 | 0.0 |
| MSP1737 | haib17CEM4890_HKC32ALXX_SL254680.311 | 41865 | no  | No  |                | <i>Klebsiella pneumoniae</i> subsp. <i>pneumoniae</i> | prophage/temperate/lysogenic | No  | 26.0 | 1.0 |
| MSP1738 | haib17CEM4890_H2NYMCCXY_SL254805.319 | 41862 | yes | No  |                |                                                       | virulent/lytic               | Yes | 11.0 | 0.0 |
| MSP1740 | haib17CEM4890_HKC32ALXX_SL254723.5   | 41835 | no  | No  |                |                                                       | virulent/lytic               | Yes | 20.0 | 0.0 |
| MSP1742 | haib17CEM4890_H2NYMCCXY_SL254770.344 | 41804 | no  | No  |                |                                                       | prophage/temperate/lysogenic | Yes | 7.0  | 0.0 |
| MSP1743 | haib17CEM4890_H75CGCCXY_SL263725.103 | 41802 | no  | No  |                | <i>Acinetobacter radioresistens</i>                   | prophage/temperate/lysogenic | Yes | 23.0 | 0.0 |
| MSP1744 | haib17CEM4890_H2NYMCCXY_SL254772.461 | 41789 | no  | No  |                |                                                       | prophage/temperate/lysogenic | Yes | 4.0  | 0.0 |
| MSP1746 | haib17KIU4866_HMCMJCCXY_SL335961.33  | 41750 | yes | No  |                | <i>Cedecea lapagei</i>                                | prophage/temperate/lysogenic | Yes | 23.0 | 0.0 |
| MSP1747 | haib17CEM4890_H75CGCCXY_SL263690.78  | 41729 | no  | Yes |                |                                                       | virulent/lytic               | Yes | 33.0 | 0.0 |
| MSP1748 | haib17CEM5106_HCY5HCCXY_SL270967.175 | 41721 | no  | Yes |                |                                                       | prophage/temperate/lysogenic | Yes | 23.0 | 0.0 |
| MSP1749 | haib18CEM5453_HMC2KCCXY_SL336697.44  | 41720 | yes | No  |                |                                                       | prophage/temperate/lysogenic | Yes | 9.0  | 0.0 |
| MSP1750 | haib17CEM4890_H2NYMCCXY_SL254850.107 | 41718 | yes | No  |                |                                                       | prophage/temperate/lysogenic | No  | 14.0 | 0.0 |

Table S1

|         |               |           |              |       |     |     |                |                          |                            |                              |                              |      |      |     |     |
|---------|---------------|-----------|--------------|-------|-----|-----|----------------|--------------------------|----------------------------|------------------------------|------------------------------|------|------|-----|-----|
| MSP1753 | haib18CEM5453 | HMC2KCCXY | SL336743.62  | 41715 | no  | Yes |                |                          |                            | prophage/temperate/lysogenic | Yes                          | 19.0 |      | 0.0 |     |
| MSP1754 | haib17KIU4866 | H7HJMCCXY | SL272802.58  | 41709 | no  | Yes |                |                          |                            | prophage/temperate/lysogenic | Yes                          | 8.0  |      | 0.0 |     |
| MSP1755 | haib17CEM5106 | HCV72CCXY | SL269799.100 | 41698 | no  | Yes |                |                          |                            | prophage/temperate/lysogenic | Yes                          | 27.0 |      | 0.0 |     |
| MSP1756 | haib17CEM5106 | HCY5JCCXY | SL269559.117 | 41692 | yes | No  |                |                          |                            | virulent/lytic               | Yes                          | 4.0  |      | 0.0 |     |
| MSP1757 | haib17CEM4890 | H75CGCCXY | SL263723.21  | 41679 | yes | No  |                |                          |                            | prophage/temperate/lysogenic | Yes                          | 9.0  |      | 0.0 |     |
| MSP1760 | haib17CEM4890 | H2NYMCCXY | SL254783.524 | 41672 | no  | Yes |                |                          |                            | prophage/temperate/lysogenic | Yes                          | 3.0  |      | 0.0 |     |
| MSP1761 | haib17KIU4866 | H7HJMCCXY | SL272741.74  | 41666 | no  | Yes |                | Pluralibacter            | gergoviae                  | virulent/lytic               | Yes                          | 23.0 |      | 0.0 |     |
| MSP1762 | haib17DB4959  | H3MGVCCXY | SL259882.57  | 41664 | yes | No  |                |                          |                            | virulent/lytic               | Yes                          | 20.0 |      | 0.0 |     |
| MSP1763 | haib17CEM5106 | HCV72CCXY | SL269733.241 | 41655 | yes | No  |                | Psychrobacter            | sp. YP14                   | prophage/temperate/lysogenic | Yes                          | 12.0 |      | 0.0 |     |
| MSP1766 | haib17KIU4866 | HMCJMCCXY | SL335956.115 | 41628 | no  | No  |                |                          |                            | virulent/lytic               | Yes                          | 12.0 |      | 0.0 |     |
| MSP1768 | haib17CEM5106 | HCV72CCXY | SL269789.138 | 41624 | no  | Yes |                |                          |                            | prophage/temperate/lysogenic | Yes                          | 26.0 |      | 0.0 |     |
| MSP1767 | haib17CEM5106 | HCY5JCCXY | SL269565.54  | 41624 | no  | Yes |                |                          |                            | prophage/temperate/lysogenic | Yes                          | 23.0 |      | 0.0 |     |
| MSP1769 | haib18CEM5453 | HMC2KCCXY | SL336755.71  | 41617 | no  | No  |                |                          |                            | prophage/temperate/lysogenic | Yes                          | 22.0 |      | 0.0 |     |
| MSP1770 | haib17KIU4866 | H7HJMCCXY | SL272766.31  | 41604 | yes | No  |                |                          |                            | virulent/lytic               | No                           | 10.0 |      | 0.0 |     |
| MSP1771 | haib17KIU4866 | H7HJMCCXY | SL272780.12  | 41595 | no  | No  |                | Xanthomonas              | campestris pv. raphani     | prophage/temperate/lysogenic | Yes                          | 25.0 |      | 1.0 |     |
| MSP1772 | haib17CEM5106 | HCVMTCCXY | SL269548.52  | 41587 | no  | Yes |                |                          |                            | prophage/temperate/lysogenic | Yes                          | 16.0 |      | 0.0 |     |
| MSP1773 | haib17CEM4890 | H2NYMCCXY | SL254805.324 | 41580 | no  | Yes |                |                          |                            | virulent/lytic               | Yes                          | 31.0 |      | 0.0 |     |
| MSP1774 | haib17CEM4890 | H2NYMCCXY | SL254784.637 | 41564 | yes | No  | Pseudomonas    | Pseudomonas putida       | Dickeya zeae CSL RW192     | prophage/temperate/lysogenic | Yes                          | 11.0 |      | 0.0 |     |
| MSP1776 | haib17CEM4890 | HKC32ALXX | SL254752.175 | 41534 | no  | No  |                |                          |                            | prophage/temperate/lysogenic | Yes                          | 27.0 |      | 0.0 |     |
| MSP1777 | haib17CEM4890 | H2NYMCCXY | SL254843.581 | 41527 | no  | Yes |                |                          |                            | virulent/lytic               | Yes                          | 18.0 |      | 0.0 |     |
| MSP1778 | haib17CEM4890 | H2NYMCCXY | SL254854.254 | 41500 | no  | Yes |                |                          |                            | prophage/temperate/lysogenic | Yes                          | 23.0 |      | 0.0 |     |
| MSP1779 | haib17CEM5106 | HCY5JCCXY | SL270945.96  | 41498 | no  | Yes |                |                          |                            | prophage/temperate/lysogenic | Yes                          | 29.0 |      | 0.0 |     |
| MSP1780 | haib17CEM4890 | H2NYMCCXY | SL254771.340 | 41492 | no  | Yes |                |                          |                            | virulent/lytic               | Yes                          | 9.0  |      | 0.0 |     |
| MSP1781 | haib17CEM4890 | H2NYMCCXY | SL254855.331 | 41488 | no  | Yes |                |                          |                            | virulent/lytic               | Yes                          | 12.0 |      | 0.0 |     |
| MSP1782 | haib18CEM5453 | HMGNSCCXY | SL344637.1   | 41482 | no  | No  |                |                          |                            | prophage/temperate/lysogenic | Yes                          | 8.0  |      | 0.0 |     |
| MSP1783 | haib17KIU4866 | H7HJMCCXY | SL272797.19  | 41465 | no  | No  |                |                          |                            | virulent/lytic               | Yes                          | 10.0 |      | 0.0 |     |
| MSP1784 | haib17KIU4866 | H7HJMCCXY | SL272773.210 | 41459 | no  | No  | Enterobacter   | None                     | Methylomicrobium album BG8 | prophage/temperate/lysogenic | Yes                          | 14.0 |      | 0.0 |     |
| MSP1785 | haib17CEM4890 | H2NYMCCXY | SL254809.38  | 41454 | no  | No  |                |                          |                            | prophage/temperate/lysogenic | Yes                          | 22.0 |      | 0.0 |     |
| MSP1786 | haib18CEM5332 | HK7G5CCXY | SL311009.25  | 41435 | yes | No  |                |                          |                            | prophage/temperate/lysogenic | Yes                          | 3.0  |      | 0.0 |     |
| MSP1787 | haib17CEM4890 | HKC32ALXX | SL254681.390 | 41417 | no  | Yes |                |                          |                            | prophage/temperate/lysogenic | Yes                          | 7.0  |      | 0.0 |     |
| MSP1788 | haib17CEM4890 | HMCJMCCXY | SL335819.74  | 41414 | no  | Yes |                |                          | Ruminococcus               | bicirculans                  | virulent/lytic               | Yes  | 32.0 |     | 0.0 |
| MSP1789 | haib17CEM5106 | HCVMTCCXY | SL269604.100 | 41393 | no  | Yes |                |                          | Dickeya                    | dianthicola RNS04.9          | prophage/temperate/lysogenic | Yes  | 21.0 |     | 0.0 |
| MSP1790 | haib17CEM4890 | H75CGCCXY | SL263721.128 | 41390 | no  | No  |                |                          | Citrobacter                | koseri                       | prophage/temperate/lysogenic | No   | 17.0 |     | 0.0 |
| MSP1791 | haib17CEM4890 | H2NYMCCXY | SL254843.582 | 41380 | no  | Yes |                |                          |                            | prophage/temperate/lysogenic | Yes                          | 12.0 |      | 0.0 |     |
| MSP1792 | haib17CEM4890 | H75CGCCXY | SL263664.108 | 41364 | no  | Yes |                |                          | Xanthomonas                | campestris pv. raphani 756C  | prophage/temperate/lysogenic | Yes  | 24.0 |     | 1.0 |
| MSP1793 | haib17CEM5106 | HCY5JCCXY | SL269589.64  | 41360 | no  | No  |                |                          |                            | prophage/temperate/lysogenic | Yes                          | 32.0 |      | 0.0 |     |
| MSP1796 | haib17KIU4866 | H7HJMCCXY | SL272803.139 | 41349 | no  | No  |                |                          |                            | prophage/temperate/lysogenic | Yes                          | 17.0 |      | 0.0 |     |
| MSP1795 | haib18CEM5453 | HMGNSCCXY | SL344634.32  | 41349 | yes | No  |                |                          |                            | prophage/temperate/lysogenic | Yes                          | 27.0 |      | 0.0 |     |
| MSP1797 | haib17KIU4866 | HMCJMCCXY | SL335946.68  | 41347 | no  | No  |                |                          |                            | virulent/lytic               | Yes                          | 19.0 |      | 0.0 |     |
| MSP1798 | haib17CEM5106 | HCY5JCCXY | SL270962.101 | 41336 | no  | Yes |                |                          |                            | virulent/lytic               | Yes                          | 20.0 |      | 0.0 |     |
| MSP1799 | haib17CEM4890 | H2NYMCCXY | SL254817.263 | 41313 | no  | No  |                | Acinetobacter            | sp. ACNIH1                 | prophage/temperate/lysogenic | Yes                          | 26.0 |      | 0.0 |     |
| MSP1800 | haib18CEM5453 | HNHKFCXY  | SL345980.24  | 41307 | no  | No  |                |                          |                            | virulent/lytic               | Yes                          | 5.0  |      | 0.0 |     |
| MSP1801 | haib17CEM4890 | H75CGCCXY | SL263654.90  | 41303 | no  | No  |                |                          | Acinetobacter              | sp. LoGeW2-3                 | prophage/temperate/lysogenic | Yes  | 31.0 |     | 0.0 |
| MSP1802 | haib17CEM4890 | HMCJMCCXY | SL335859.19  | 41256 | no  | No  | Staphylococcus | Staphylococcus aureus    |                            | prophage/temperate/lysogenic | No                           | 22.0 |      | 1.0 |     |
| MSP1803 | haib17CEM4890 | H2NYMCCXY | SL254843.584 | 41239 | no  | Yes |                |                          |                            | prophage/temperate/lysogenic | Yes                          | 9.0  |      | 0.0 |     |
| MSP1804 | haib17CEM4890 | HKC32ALXX | SL254718.278 | 41229 | no  | No  |                |                          |                            | virulent/lytic               | Yes                          | 29.0 |      | 0.0 |     |
| MSP1805 | haib17CEM4890 | H75CGCCXY | SL263677.140 | 41223 | yes | No  |                |                          |                            | virulent/lytic               | Yes                          | 19.0 |      | 0.0 |     |
| MSP1806 | haib17KIU4866 | HMCJMCCXY | SL335949.125 | 41207 | no  | No  |                |                          | Pseudomonas                | sp. CMR12a                   | prophage/temperate/lysogenic | Yes  | 17.0 |     | 0.0 |
| MSP1807 | haib17CEM5106 | HCY5JCCXY | SL269579.61  | 41202 | no  | Yes |                |                          |                            | virulent/lytic               | Yes                          | 14.0 |      | 0.0 |     |
| MSP1808 | haib17CEM4890 | H2NYMCCXY | SL254793.270 | 41198 | yes | No  |                |                          |                            | prophage/temperate/lysogenic | Yes                          | 13.0 |      | 0.0 |     |
| MSP1809 | haib17CEM4890 | H7KYMCCXY | SL273035.1   | 41177 | no  | No  |                |                          |                            | virulent/lytic               | Yes                          | 26.0 |      | 0.0 |     |
| MSP1811 | haib17KIU4866 | H7HJMCCXY | SL272778.184 | 41174 | yes | No  |                |                          | Pseudomonas                | aeruginosa 19BR              | prophage/temperate/lysogenic | Yes  | 16.0 |     | 1.0 |
| MSP1810 | haib18CEM5453 | HMC2KCCXY | SL336784.7   | 41174 | no  | Yes |                |                          |                            | virulent/lytic               | Yes                          | 33.0 |      | 0.0 |     |
| MSP1812 | haib17CEM5241 | HMGMHCCXY | SL343483.3   | 41172 | yes | No  |                |                          |                            | virulent/lytic               | Yes                          | 5.0  |      | 0.0 |     |
| MSP1814 | haib17CEM5106 | HCV72CCXY | SL269798.198 | 41151 | no  | No  | Arthrobacter   | Arthrobacter globiformis |                            | virulent/lytic               | Yes                          | 23.0 |      | 0.0 |     |
| MSP1815 | haib17CEM5106 | HCV72CCXY | SL269762.74  | 41150 | no  | No  |                |                          | Enterobacter               | cloacae                      | virulent/lytic               | No   | 27.0 |     | 0.0 |
| MSP1816 | haib17KIU4866 | HMCJMCCXY | SL335956.116 | 41124 | no  | Yes |                |                          | Moraxella                  | osloensis                    | prophage/temperate/lysogenic | Yes  | 30.0 |     | 1.0 |
| MSP1819 | haib17CEM4890 | H2NYMCCXY | SL254771.347 | 41106 | no  | Yes |                |                          | Pseudomonas                | sp. Leaf58                   | prophage/temperate/lysogenic | Yes  | 31.0 |     | 0.0 |
| MSP1820 | haib17CEM5106 | HCV72CCXY | SL269772.110 | 41084 | no  | Yes |                |                          | Acinetobacter              | baumannii                    | prophage/temperate/lysogenic | Yes  | 32.0 |     | 1.0 |
| MSP1821 | haib17CEM4890 | HKC32ALXX | SL254718.279 | 41068 | no  | No  |                |                          |                            | virulent/lytic               | Yes                          | 31.0 |      | 0.0 |     |
| MSP1822 | haib17KIU4866 | H7HJMCCXY | SL272809.58  | 41063 | no  | Yes |                |                          | Acinetobacter              | sp. ACNIH1                   | prophage/temperate/lysogenic | Yes  | 29.0 |     | 0.0 |
| MSP1823 | haib17CEM4890 | HKC32ALXX | SL254763.125 | 41055 | no  | No  | Bacillus       | Bacillus cereus          | Aeribacillus pallidus      | prophage/temperate/lysogenic | Yes                          | 14.0 |      | 0.0 |     |
| MSP1824 | haib17CEM4890 | HKC32ALXX | SL254762.63  | 41035 | no  | Yes |                |                          |                            | virulent/lytic               | Yes                          | 21.0 |      | 0.0 |     |
| MSP1825 | haib17CEM4890 | H7KYMCCXY | SL273060.70  | 41025 | yes | No  |                |                          |                            | virulent/lytic               | Yes                          | 14.0 |      | 0.0 |     |
| MSP1826 | haib17CEM4890 | H2NYMCCXY | SL254794.657 | 41018 | no  | No  |                |                          |                            | virulent/lytic               | Yes                          | 19.0 |      | 0.0 |     |
| MSP1827 | haib17KIU4866 | H7HJMCCXY | SL272779.27  | 41013 | no  | No  |                |                          | Pseudomonas                | sp. pHDV1                    | prophage/temperate/lysogenic | Yes  | 19.0 |     | 0.0 |
| MSP1828 | haib18CEM5453 | HNHKFCXY  | SL345590.20  | 40993 | no  | Yes |                |                          |                            | prophage/temperate/lysogenic | Yes                          | 32.0 |      | 0.0 |     |
| MSP1829 | haib18CEM5453 | HMC2KCCXY | SL336650.36  | 40989 | no  | Yes |                |                          |                            | prophage/temperate/lysogenic | No                           | 29.0 |      | 0.0 |     |

Table S1

|         |                                      |       |     |     |                   |                                                                             |                                       |                              |      |      |     |
|---------|--------------------------------------|-------|-----|-----|-------------------|-----------------------------------------------------------------------------|---------------------------------------|------------------------------|------|------|-----|
| MSP1830 | haib17CEM4890_H2NYMCCXY_SL254843.589 | 40968 | no  | No  |                   | <i>Pseudomonas aeruginosa</i>                                               | prophage/temperate/lysogenic          | Yes                          | 8.0  | 1.0  |     |
| MSP1831 | haib17CEM5106_HCY5HCCXY_SL270908.49  | 40956 | no  | No  |                   |                                                                             | prophage/temperate/lysogenic          | Yes                          | 16.0 | 0.0  |     |
| MSP1832 | haib17CEM5106_HCV72CCXY_SL269768.104 | 40949 | no  | No  |                   |                                                                             | prophage/temperate/lysogenic          | Yes                          | 21.0 | 0.0  |     |
| MSP1833 | haib17CEM4890_H2NYMCCXY_SL254838.117 | 40938 | no  | No  | Enterococcus      | <i>Enterococcus faecium</i>                                                 | virulent/lytic                        | No                           | 9.0  | 0.0  |     |
| MSP1834 | haib17DB4959_HMCMJCCXY_SL336180.7    | 40917 | no  | No  |                   |                                                                             | virulent/lytic                        | Yes                          | 19.0 | 0.0  |     |
| MSP1835 | haib17CEM5106_HCV72CCXY_SL269784.111 | 40916 | no  | Yes |                   | <i>Bifidobacterium breve</i>                                                | virulent/lytic                        | Yes                          | 25.0 | 0.0  |     |
| MSP1836 | haib17KIU4866_HMCMJCCXY_SL335947.139 | 40914 | no  | Yes |                   | <i>Pseudomonas aeruginosa</i>                                               | prophage/temperate/lysogenic          | Yes                          | 21.0 | 1.0  |     |
| MSP1838 | haib17CEM4890_H2NYMCCXY_SL254784.646 | 40897 | no  | No  |                   |                                                                             | virulent/lytic                        | Yes                          | 28.0 | 0.0  |     |
| MSP1839 | haib18CEM5332_HMGW3CCXY_SL342430.1   | 40874 | no  | No  |                   | <i>Roseomonas</i> sp. FDAARGOS_362                                          | virulent/lytic                        | Yes                          | 33.0 | 1.0  |     |
| MSP1840 | haib18CEM5453_HMC2KCCXY_SL336626.1   | 40868 | no  | No  |                   | <i>Klebsiella pneumoniae</i> subsp. <i>pneumoniae</i>                       | virulent/lytic                        | No                           | 11.0 | 1.0  |     |
| MSP1841 | haib17CEM4890_HKC32ALXX_SL254679.70  | 40865 | no  | Yes |                   |                                                                             | virulent/lytic                        | Yes                          | 7.0  | 0.0  |     |
| MSP1842 | haib17CEM4890_H2NYMCCXY_SL254783.540 | 40854 | no  | No  |                   |                                                                             | prophage/temperate/lysogenic          | Yes                          | 12.0 | 0.0  |     |
| MSP1843 | haib17CEM4890_HKC32ALXX_SL254698.26  | 40848 | yes | No  |                   | <i>Halorussus</i> sp. RC-68                                                 | prophage/temperate/lysogenic          | Yes                          | 25.0 | 0.0  |     |
| MSP1844 | haib17CEM4890_HKC32ALXX_SL254684.9   | 40829 | no  | No  |                   |                                                                             | virulent/lytic                        | Yes                          | 23.0 | 0.0  |     |
| MSP1845 | haib17CEM4890_H2NYMCCXY_SL254770.349 | 40827 | no  | No  |                   |                                                                             | virulent/lytic                        | Yes                          | 26.0 | 0.0  |     |
| MSP1846 | haib17DB4959_H3MGVCCXY_SL259882.59   | 40824 | no  | No  |                   |                                                                             | virulent/lytic                        | Yes                          | 5.0  | 0.0  |     |
| MSP1847 | haib18CEM5453_HMGN5CCXY_SL344674.2   | 40818 | no  | No  |                   |                                                                             | virulent/lytic                        | Yes                          | 4.0  | 0.0  |     |
| MSP1848 | haib17CEM4890_H2NYMCCXY_SL254818.469 | 40802 | no  | No  |                   | <i>Pectobacterium brasiliense</i>                                           | prophage/temperate/lysogenic          | No                           | 26.0 | 0.0  |     |
| MSP1849 | haib17KIU4866_HMCMJCCXY_SL335956.117 | 40800 | no  | Yes |                   | <i>Paenibacillus riograndensis</i> SBR5                                     | virulent/lytic                        | Yes                          | 15.0 | 0.0  |     |
| MSP1850 | haib17KIU4866_H7HJMCCXY_SL272827.120 | 40799 | no  | No  |                   | <i>Salmonella enterica</i> subsp. <i>enterica</i> serovar Bergen str. ST350 | virulent/lytic                        | Yes                          | 17.0 | 1.0  |     |
| MSP1851 | haib17CEM5106_HCV72CCXY_SL269799.104 | 40797 | no  | No  | Propionibacterium | <i>Propionibacterium freudenreichii</i>                                     | prophage/temperate/lysogenic          | Yes                          | 26.0 | 0.0  |     |
| MSP1854 | haib17KIU4866_HMCMJCCXY_SL335937.38  | 40774 | yes | No  | Enterococcus      | <i>Enterococcus faecalis</i>                                                | virulent/lytic                        | Yes                          | 7.0  | 0.0  |     |
| MSP1855 | haib17CEM4890_H75CGCCXY_SL263689.159 | 40760 | no  | Yes |                   | <i>Vagococcus penaci</i>                                                    | virulent/lytic                        | Yes                          | 23.0 | 0.0  |     |
| MSP1857 | haib17CEM5106_HCY5HCCXY_SL270926.21  | 40755 | no  | No  |                   |                                                                             | virulent/lytic                        | Yes                          | 31.0 | 0.0  |     |
| MSP1858 | haib17KIU4866_H7HJMCCXY_SL272804.95  | 40750 | no  | No  |                   |                                                                             | virulent/lytic                        | No                           | 26.0 | 0.0  |     |
| MSP1860 | haib17CEM4890_HKC32ALXX_SL254722.53  | 40742 | yes | No  |                   | <i>Actinomyces</i> sp. Chiba101                                             | prophage/temperate/lysogenic          | No                           | 11.0 | 0.0  |     |
| MSP1861 | haib17KIU4866_H7HJMCCXY_SL272764.53  | 40737 | no  | Yes |                   |                                                                             | virulent/lytic                        | Yes                          | 26.0 | 0.0  |     |
| MSP1862 | haib17CEM4890_H2NYMCCXY_SL254838.118 | 40712 | no  | Yes |                   | <i>Pectobacterium brasiliense</i>                                           | virulent/lytic                        | No                           | 33.0 | 0.0  |     |
| MSP1863 | haib18CEM5332_HK7G5CCXY_SL311009.26  | 40676 | no  | No  |                   |                                                                             | virulent/lytic                        | Yes                          | 27.0 | 0.0  |     |
| MSP1864 | haib17CEM5106_HCY5JCCXY_SL269573.108 | 40660 | no  | Yes | Lactococcus       | <i>Lactococcus garvieae</i>                                                 | prophage/temperate/lysogenic          | Yes                          | 23.0 | 0.0  |     |
| MSP1865 | haib17CEM4890_HKC32ALXX_SL254706.435 | 40641 | no  | No  |                   | <i>Peptoniphilus harei</i>                                                  | prophage/temperate/lysogenic          | Yes                          | 12.0 | 0.0  |     |
| MSP1867 | haib17CEM4890_H2NYMCCXY_SL254769.372 | 40624 | yes | No  |                   |                                                                             | prophage/temperate/lysogenic          | Yes                          | 16.0 | 0.0  |     |
| MSP1868 | haib17CEM5106_HCV72CCXY_SL269806.180 | 40596 | yes | No  | Faecalibacterium  | <i>Faecalibacterium prausnitzii</i>                                         | prophage/temperate/lysogenic          | Yes                          | 11.0 | 0.0  |     |
| MSP1869 | haib17KIU4866_H7HJMCCXY_SL272824.128 | 40591 | no  | Yes |                   | <i>Dickeya</i> sp. CSL RW240                                                | virulent/lytic                        | Yes                          | 28.0 | 0.0  |     |
| MSP1870 | haib17CEM5106_HCVMTCCXY_SL269603.81  | 40586 | no  | Yes |                   |                                                                             | virulent/lytic                        | Yes                          | 19.0 | 0.0  |     |
| MSP1871 | haib17CEM4890_H2NYMCCXY_SL254781.517 | 40584 | no  | No  |                   |                                                                             | prophage/temperate/lysogenic          | Yes                          | 10.0 | 0.0  |     |
| MSP1872 | haib17CEM4890_HKC32ALXX_SL254681.398 | 40579 | no  | No  |                   | <i>Clostridium botulinum</i>                                                | prophage/temperate/lysogenic          | Yes                          | 9.0  | 0.0  |     |
| MSP1873 | haib17CEM4890_H2NYMCCXY_SL254783.547 | 40573 | no  | No  |                   |                                                                             | virulent/lytic                        | No                           | 17.0 | 0.0  |     |
| MSP1875 | haib17CEM4890_HMCMJCCXY_SL335797.101 | 40569 | no  | No  |                   |                                                                             | virulent/lytic                        | Yes                          | 3.0  | 0.0  |     |
| MSP1876 | haib17CEM4890_HKC32ALXX_SL254705.353 | 40564 | no  | No  |                   |                                                                             | prophage/temperate/lysogenic          | Yes                          | 33.0 | 0.0  |     |
| MSP1877 | haib17CEM4890_HKC32ALXX_SL254747.73  | 40558 | yes | No  |                   |                                                                             | virulent/lytic                        | Yes                          | 18.0 | 0.0  |     |
| MSP1878 | haib18CEM5453_HNHKFCXY_SL345575.30   | 40552 | no  | Yes |                   |                                                                             | prophage/temperate/lysogenic          | Yes                          | 11.0 | 0.0  |     |
| MSP1880 | haib17CEM4890_H2NYMCCXY_SL254776.114 | 40550 | no  | No  |                   | <i>Corynebacterium striatum</i>                                             | prophage/temperate/lysogenic          | Yes                          | 32.0 | 0.0  |     |
| MSP1879 | haib17CEM5106_HCCGHCCXY_SL270293.4   | 40550 | yes | No  |                   |                                                                             | virulent/lytic                        | Yes                          | 5.0  | 0.0  |     |
| MSP1881 | haib18CEM5453_HMGW3CCXY_SL342294.1   | 40542 | no  | No  |                   | <i>Klebsiella pneumoniae</i> subsp. <i>pneumoniae</i>                       | virulent/lytic                        | Yes                          | 21.0 | 1.0  |     |
| MSP1882 | haib17CEM4890_HKC32ALXX_SL254717.29  | 40477 | no  | Yes |                   | <i>Acinetobacter</i> sp. LoGeW2-3                                           | prophage/temperate/lysogenic          | Yes                          | 28.0 | 0.0  |     |
| MSP1883 | haib17CEM4890_H2NYMCCXY_SL254848.89  | 40466 | no  | No  |                   | <i>Staphylococcus warneri</i>                                               | prophage/temperate/lysogenic          | No                           | 32.0 | 0.0  |     |
| MSP1884 | haib17CEM5106_HCY5JCCXY_SL269583.79  | 40464 | no  | Yes |                   |                                                                             | prophage/temperate/lysogenic          | Yes                          | 13.0 | 0.0  |     |
| MSP1885 | haib17KIU4866_H7HJMCCXY_SL272768.115 | 40454 | no  | No  |                   |                                                                             | virulent/lytic                        | Yes                          | 4.0  | 0.0  |     |
| MSP1886 | haib17CEM4890_H2NYMCCXY_SL254843.593 | 40448 | no  | Yes |                   | <i>Paenibacillus yonginensis</i>                                            | virulent/lytic                        | Yes                          | 9.0  | 0.0  |     |
| MSP1887 | haib17CEM4890_HKC32ALXX_SL254717.30  | 40431 | no  | Yes |                   |                                                                             | prophage/temperate/lysogenic          | Yes                          | 20.0 | 0.0  |     |
| MSP1889 | haib17CEM4890_HKC32ALXX_SL254718.281 | 40408 | no  | No  |                   |                                                                             | prophage/temperate/lysogenic          | Yes                          | 14.0 | 0.0  |     |
| MSP1890 | haib17CEM4890_H2NYMCCXY_SL254826.250 | 40403 | no  | Yes |                   |                                                                             | virulent/lytic                        | Yes                          | 23.0 | 0.0  |     |
| MSP1891 | haib17CEM4890_H2NYMCCXY_SL254843.594 | 40399 | no  | Yes |                   |                                                                             | prophage/temperate/lysogenic          | Yes                          | 14.0 | 0.0  |     |
| MSP1892 | haib17CEM4890_H2NYMCCXY_SL254805.331 | 40398 | no  | Yes | Stenotrophomonas  | None                                                                        | <i>Dickeya chrysanthemi</i> NCPPB 402 | prophage/temperate/lysogenic | No   | 28.0 | 0.0 |
| MSP1893 | haib18CEM5453_HNHKFCXY_SL345538.133  | 40390 | yes | No  |                   |                                                                             | prophage/temperate/lysogenic          | Yes                          | 4.0  | 0.0  |     |
| MSP1894 | haib17DB4959_HMGW3CCXY_SL342470.1    | 40375 | no  | No  |                   |                                                                             | virulent/lytic                        | Yes                          | 16.0 | 0.0  |     |
| MSP1895 | haib17CEM5106_HCCGHCCXY_SL270510.369 | 40371 | no  | Yes |                   | <i>Salmonella enterica</i> subsp. <i>diarizonae</i>                         | virulent/lytic                        | No                           | 31.0 | 1.0  |     |
| MSP1896 | haib17CEM4890_HKC32ALXX_SL254706.440 | 40344 | no  | Yes |                   |                                                                             | virulent/lytic                        | Yes                          | 18.0 | 0.0  |     |
| MSP1897 | haib18CEM5453_HMC2KCCXY_SL336578.17  | 40305 | no  | No  |                   | <i>Streptomonospora</i> sp. M2                                              | virulent/lytic                        | Yes                          | 18.0 | 0.0  |     |
| MSP1898 | haib17CEM4890_H2NYMCCXY_SL254790.123 | 40291 | no  | No  | Arthrobacter      | None                                                                        | virulent/lytic                        | Yes                          | 24.0 | 0.0  |     |
| MSP1899 | haib17CEM4890_HMCMJCCXY_SL335783.85  | 40277 | no  | Yes |                   | <i>Acinetobacter baumannii</i>                                              | prophage/temperate/lysogenic          | Yes                          | 31.0 | 1.0  |     |
| MSP1900 | haib17KIU4866_H7HJMCCXY_SL272740.114 | 40265 | no  | Yes |                   |                                                                             | prophage/temperate/lysogenic          | Yes                          | 14.0 | 0.0  |     |
| MSP1901 | haib17CEM4890_H2NYMCCXY_SL254818.476 | 40264 | no  | No  |                   |                                                                             | virulent/lytic                        | Yes                          | 22.0 | 0.0  |     |
| MSP1902 | haib17CEM5106_HCY5HCCXY_SL271111.49  | 40259 | no  | No  |                   | <i>Clostridioides difficile</i>                                             | prophage/temperate/lysogenic          | Yes                          | 31.0 | 0.0  |     |
| MSP1903 | haib17CEM4890_H2NYMCCXY_SL254854.270 | 40198 | no  | Yes | Escherichia       | None                                                                        | <i>Atlantibacter hermannii</i>        | prophage/temperate/lysogenic | No   | 16.0 | 0.0 |
| MSP1904 | haib17KIU4866_HMCMJCCXY_SL335888.25  | 40197 | no  | Yes |                   | <i>Pseudomonas balearica</i> DSM 6083                                       | virulent/lytic                        | Yes                          | 30.0 | 1.0  |     |
| MSP1905 | haib18CEM5453_HNHKFCXY_SL345930.6    | 40192 | no  | No  |                   |                                                                             | virulent/lytic                        | Yes                          | 1.0  | 0.0  |     |

Table S1

|         |                                      |       |    |     |            |                       |                                                             |                              |     |      |     |
|---------|--------------------------------------|-------|----|-----|------------|-----------------------|-------------------------------------------------------------|------------------------------|-----|------|-----|
| MSP1907 | haib17CEM4890_H2NYMCCXY_SL254772.484 | 40177 | no | No  |            |                       |                                                             | prophage/temperate/lysogenic | Yes | 33.0 | 0.0 |
| MSP1908 | haib18CEM5453_HNHKFCXY_SL346051.5    | 40149 | no | No  |            |                       | Corynebacterium urealyticum DSM 7111                        | virulent/lytic               | Yes | 32.0 | 0.0 |
| MSP1909 | haib17KIU4866_HMCMJCCXY_SL335947.142 | 40138 | no | No  |            |                       |                                                             | virulent/lytic               | Yes | 18.0 | 0.0 |
| MSP1910 | haib17CEM4890_H2NYMCCXY_SL254783.562 | 40129 | no | Yes |            |                       |                                                             | virulent/lytic               | Yes | 14.0 | 0.0 |
| MSP1911 | haib17KIU4866_H7HJMCCXY_SL272773.215 | 40115 | no | Yes |            |                       |                                                             | virulent/lytic               | Yes | 12.0 | 0.0 |
| MSP1912 | haib17CEM4890_H75CGCCXY_SL263654.94  | 40111 | no | Yes |            |                       |                                                             | prophage/temperate/lysogenic | Yes | 23.0 | 0.0 |
| MSP1913 | haib17CEM4890_H75CGCCXY_SL263709.58  | 40110 | no | No  |            |                       |                                                             | prophage/temperate/lysogenic | Yes | 21.0 | 0.0 |
| MSP1914 | haib18CEM5453_HMC2KCCXY_SL336638.4   | 40101 | no | No  |            |                       |                                                             | prophage/temperate/lysogenic | Yes | 25.0 | 0.0 |
| MSP1915 | haib17CEM4890_H2NYMCCXY_SL254841.290 | 40097 | no | No  |            |                       |                                                             | prophage/temperate/lysogenic | Yes | 31.0 | 0.0 |
| MSP1916 | haib17CEM5106_HCY5HCCXY_SL270976.242 | 40096 | no | Yes |            |                       |                                                             | virulent/lytic               | Yes | 12.0 | 0.0 |
| MSP1917 | haib17KIU4866_H7HJMCCXY_SL272799.128 | 40083 | no | Yes |            |                       |                                                             | prophage/temperate/lysogenic | Yes | 14.0 | 0.0 |
| MSP1918 | haib17KIU4866_H7HJMCCXY_SL272773.216 | 40080 | no | No  |            |                       |                                                             | virulent/lytic               | Yes | 33.0 | 0.0 |
| MSP1919 | haib17CEM5106_HCV72CCXY_SL269772.115 | 40063 | no | Yes |            |                       |                                                             | prophage/temperate/lysogenic | Yes | 26.0 | 0.0 |
| MSP1920 | haib17KIU4866_H7HJMCCXY_SL272771.127 | 40053 | no | Yes | Klebsiella | Klebsiella_pneumoniae | Salmonella enterica subsp. enterica serovar Montevideo str. | prophage/temperate/lysogenic | Yes | 25.0 | 0.0 |
| MSP1921 | haib17CEM5106_HCY5HCCXY_SL270923.1   | 40049 | no | No  |            |                       | Bacillus coagulans                                          | prophage/temperate/lysogenic | Yes | 18.0 | 0.0 |
| MSP1922 | haib17CEM4890_H2NYMCCXY_SL254790.125 | 40021 | no | Yes |            |                       |                                                             | virulent/lytic               | Yes | 24.0 | 0.0 |
| MSP1923 | haib17CEM5106_HCV72CCXY_SL269762.81  | 40001 | no | No  |            |                       | Cedecea lapagei                                             | prophage/temperate/lysogenic | Yes | 25.0 | 0.0 |

Table S2

**Supplementary Table S2. Recovered phages assigned with a putative host by vHULK.**

The dashed cells present the recovered genomes with predictions only at the genus level.

| <b>Genus</b>   | <b>Species</b>                         | <b>Number of PPGs</b> |
|----------------|----------------------------------------|-----------------------|
| Acinetobacter  | <i>Acinetobacter baumannii</i>         | 7                     |
| Enterobacter   | ----                                   | 3                     |
| Enterococcus   | <i>Enterococcus faecium</i>            | 2                     |
|                | <i>Enterococcus faecalis</i>           | 2                     |
| Klebsiella     | <i>Klebsiella pneumoniae</i>           | 4                     |
|                | ----                                   | 4                     |
| Pseudomonas    | <i>Pseudomonas aeruginosa</i>          | 20                    |
|                | <i>Pseudomonas fluorescens</i>         | 8                     |
|                | <i>Pseudomonas putida</i>              | 2                     |
| Staphylococcus | ----                                   | 1                     |
|                | <i>Staphylococcus aureus</i>           | 17                    |
|                | <i>Staphylococcus epidermidis</i>      | 12                    |
|                | <i>Staphylococcus pseudintermedius</i> | 1                     |
|                | Total                                  | 83                    |

Table S3

**Supplementary Table S3. Rank of PPG hosts predicted by vHULK.**

| City      | Bacteria/ PPG Host                  | Bacteria abundance rank | Bacteria abundance (%) | PPGs abundance rank | PPGs abundance (%) |
|-----------|-------------------------------------|-------------------------|------------------------|---------------------|--------------------|
| auckland  | <i>Stenotrophomonas maltophilia</i> | 1                       | 0,32824                | 15                  | 0,08389            |
| auckland  | <i>Pseudomonas aeruginosa</i>       | 3                       | 0,08573                | 2                   | 0,96212            |
| auckland  | <i>Pseudomonas fluorescens</i>      | 4                       | 0,08441                | 5                   | 0,30690            |
| auckland  | <i>Escherichia coli</i>             | 7                       | 0,02382                | 23                  | 0,00100            |
| auckland  | <i>Acinetobacter baumannii</i>      | 10                      | 0,01772                | 7                   | 0,14387            |
| auckland  | <i>Enterococcus faecalis</i>        | 25                      | 0,00058                | 21                  | 0,00419            |
| auckland  | <i>Staphylococcus aureus</i>        | 28                      | 0,00034                | 6                   | 0,21352            |
| auckland  | <i>Staphylococcus epidermidis</i>   | 29                      | 0,00031                | 4                   | 0,54592            |
| berlin    | <i>Stenotrophomonas maltophilia</i> | 3                       | 0,40484                | 20                  | 0,02466            |
| berlin    | <i>Staphylococcus epidermidis</i>   | 4                       | 0,30936                | 1                   | 2,74046            |
| berlin    | <i>Pseudomonas aeruginosa</i>       | 6                       | 0,09053                | 3                   | 1,79556            |
| berlin    | <i>Staphylococcus aureus</i>        | 9                       | 0,04986                | 2                   | 2,07602            |
| berlin    | <i>Acinetobacter baumannii</i>      | 10                      | 0,03613                | 6                   | 0,57434            |
| berlin    | <i>Escherichia coli</i>             | 12                      | 0,02049                | 26                  | 0,01138            |
| berlin    | <i>Pseudomonas fluorescens</i>      | 21                      | 0,00954                | 4                   | 1,58783            |
| berlin    | <i>Enterococcus faecalis</i>        | 26                      | 0,00362                | 31                  | 0,00498            |
| bogota    | <i>Pseudomonas fluorescens</i>      | 2                       | 0,17466                | 6                   | 0,63733            |
| bogota    | <i>Staphylococcus epidermidis</i>   | 3                       | 0,11095                | 1                   | 2,02663            |
| bogota    | <i>Acinetobacter baumannii</i>      | 7                       | 0,03153                | 3                   | 1,38348            |
| bogota    | <i>Pseudomonas aeruginosa</i>       | 9                       | 0,02862                | 5                   | 0,67338            |
| bogota    | <i>Staphylococcus aureus</i>        | 11                      | 0,01976                | 2                   | 1,76053            |
| bogota    | <i>Escherichia coli</i>             | 12                      | 0,01959                | 21                  | 0,03320            |
| bogota    | <i>Stenotrophomonas maltophilia</i> | 17                      | 0,01641                | 28                  | 0,00820            |
| bogota    | <i>Enterococcus faecalis</i>        | 29                      | 0,00495                | 25                  | 0,01344            |
| cairngorm | <i>Pseudomonas aeruginosa</i>       | 2                       | 0,22953                | 4                   | 0,69385            |
| cairngorm | <i>Staphylococcus aureus</i>        | 5                       | 0,15873                | 2                   | 1,26327            |
| cairngorm | <i>Enterococcus faecalis</i>        | 6                       | 0,14260                | 14                  | 0,09711            |
| cairngorm | <i>Escherichia coli</i>             | 9                       | 0,09505                | 16                  | 0,06401            |
| cairngorm | <i>Staphylococcus epidermidis</i>   | 11                      | 0,02596                | 1                   | 9,95584            |
| cairngorm | <i>Stenotrophomonas maltophilia</i> | 17                      | 0,00716                | 26                  | 0,00000            |

Table S3

|           |                              |    |         |    |         |
|-----------|------------------------------|----|---------|----|---------|
| cairngorm | Acinetobacter baumannii      | 18 | 0,00387 | 17 | 0,04704 |
| cairngorm | Pseudomonas fluorescens      | 27 | 0,00180 | 5  | 0,62473 |
| denver    | Stenotrophomonas maltophilia | 2  | 0,45928 | 26 | 0,00261 |
| denver    | Staphylococcus epidermidis   | 6  | 0,02133 | 5  | 0,22569 |
| denver    | Pseudomonas aeruginosa       | 8  | 0,01474 | 8  | 0,13303 |
| denver    | Pseudomonas fluorescens      | 9  | 0,01181 | 6  | 0,19429 |
| denver    | Acinetobacter baumannii      | 11 | 0,00956 | 9  | 0,11382 |
| denver    | Escherichia coli             | 12 | 0,00827 | 22 | 0,00363 |
| denver    | Staphylococcus aureus        | 22 | 0,00512 | 4  | 0,34066 |
| denver    | Enterococcus faecalis        | 31 | 0,00132 | 20 | 0,00680 |
| doha      | Pseudomonas aeruginosa       | 2  | 3,99929 | 1  | 4,57110 |
| doha      | Escherichia coli             | 4  | 2,47975 | 5  | 0,69663 |
| doha      | Staphylococcus aureus        | 6  | 0,65281 | 4  | 0,91822 |
| doha      | Enterococcus faecalis        | 7  | 0,17743 | 14 | 0,06614 |
| doha      | Pseudomonas fluorescens      | 12 | 0,03567 | 3  | 1,00666 |
| doha      | Stenotrophomonas maltophilia | 13 | 0,02550 | 25 | 0,00081 |
| doha      | Acinetobacter baumannii      | 15 | 0,02114 | 13 | 0,06673 |
| doha      | Staphylococcus epidermidis   | 17 | 0,01252 | 2  | 2,23113 |
| fairbanks | Staphylococcus epidermidis   | 1  | 9,00361 | 2  | 4,80617 |
| fairbanks | Staphylococcus aureus        | 5  | 0,11906 | 1  | 8,01142 |
| fairbanks | Stenotrophomonas maltophilia | 9  | 0,06400 | 17 | 0,04035 |
| fairbanks | Escherichia coli             | 12 | 0,02799 | 20 | 0,01025 |
| fairbanks | Pseudomonas fluorescens      | 14 | 0,01791 | 7  | 0,26657 |
| fairbanks | Pseudomonas aeruginosa       | 16 | 0,01154 | 9  | 0,22009 |
| fairbanks | Acinetobacter baumannii      | 18 | 0,00979 | 6  | 0,29207 |
| fairbanks | Enterococcus faecalis        | 27 | 0,00174 | 23 | 0,00491 |
| hamilton  | Stenotrophomonas maltophilia | 1  | 0,77765 | 5  | 0,25532 |
| hamilton  | Pseudomonas fluorescens      | 3  | 0,20556 | 2  | 0,55694 |
| hamilton  | Pseudomonas aeruginosa       | 4  | 0,08008 | 1  | 0,68051 |
| hamilton  | Acinetobacter baumannii      | 5  | 0,06056 | 9  | 0,07794 |
| hamilton  | Escherichia coli             | 7  | 0,05464 | 21 | 0,00183 |
| hamilton  | Enterococcus faecalis        | 12 | 0,01254 | 18 | 0,00788 |
| hamilton  | Staphylococcus epidermidis   | 24 | 0,00021 | 10 | 0,04421 |
| hamilton  | Staphylococcus aureus        | 28 | 0,00008 | 13 | 0,01872 |

Table S3

|              |                                     |    |          |    |          |
|--------------|-------------------------------------|----|----------|----|----------|
| hanoi        | <i>Escherichia coli</i>             | 1  | 1,17647  | 1  | 2,57564  |
| hanoi        | <i>Acinetobacter baumannii</i>      | 5  | 0,06655  | 5  | 0,39403  |
| hanoi        | <i>Stenotrophomonas maltophilia</i> | 7  | 0,04055  | 14 | 0,02761  |
| hanoi        | <i>Pseudomonas aeruginosa</i>       | 10 | 0,01564  | 8  | 0,12179  |
| hanoi        | <i>Staphylococcus aureus</i>        | 12 | 0,01011  | 3  | 0,82786  |
| hanoi        | <i>Enterococcus faecalis</i>        | 14 | 0,00898  | 15 | 0,02269  |
| hanoi        | <i>Staphylococcus epidermidis</i>   | 17 | 0,00704  | 4  | 0,63092  |
| hanoi        | <i>Pseudomonas fluorescens</i>      | 27 | 0,00167  | 11 | 0,06171  |
| hong_kong    | <i>Pseudomonas aeruginosa</i>       | 4  | 0,07228  | 6  | 0,30082  |
| hong_kong    | <i>Stenotrophomonas maltophilia</i> | 6  | 0,04472  | 15 | 0,01369  |
| hong_kong    | <i>Acinetobacter baumannii</i>      | 8  | 0,02743  | 12 | 0,09828  |
| hong_kong    | <i>Staphylococcus epidermidis</i>   | 16 | 0,01020  | 2  | 0,64528  |
| hong_kong    | <i>Escherichia coli</i>             | 23 | 0,00485  | 20 | 0,00531  |
| hong_kong    | <i>Staphylococcus aureus</i>        | 25 | 0,00351  | 5  | 0,38241  |
| hong_kong    | <i>Pseudomonas fluorescens</i>      | 26 | 0,00275  | 7  | 0,21947  |
| hong_kong    | <i>Enterococcus faecalis</i>        | 28 | 0,00131  | 23 | 0,00306  |
| ilorin       | <i>Stenotrophomonas maltophilia</i> | 2  | 0,45615  | 20 | 0,02425  |
| ilorin       | <i>Escherichia coli</i>             | 4  | 0,18761  | 7  | 0,20947  |
| ilorin       | <i>Pseudomonas aeruginosa</i>       | 5  | 0,09112  | 1  | 4,89105  |
| ilorin       | <i>Acinetobacter baumannii</i>      | 7  | 0,06359  | 8  | 0,19310  |
| ilorin       | <i>Staphylococcus epidermidis</i>   | 13 | 0,00675  | 12 | 0,10186  |
| ilorin       | <i>Pseudomonas fluorescens</i>      | 16 | 0,00540  | 2  | 2,58153  |
| ilorin       | <i>Enterococcus faecalis</i>        | 17 | 0,00440  | 24 | 0,01292  |
| ilorin       | <i>Staphylococcus aureus</i>        | 26 | 0,00167  | 15 | 0,07690  |
| kuala_lumpur | <i>Pseudomonas aeruginosa</i>       | 1  | 43,17741 | 1  | 38,35489 |
| kuala_lumpur | <i>Escherichia coli</i>             | 3  | 11,57926 | 2  | 3,22304  |
| kuala_lumpur | <i>Enterococcus faecalis</i>        | 6  | 0,58779  | 5  | 0,14180  |
| kuala_lumpur | <i>Staphylococcus aureus</i>        | 7  | 0,58672  | 8  | 0,02480  |
| kuala_lumpur | <i>Stenotrophomonas maltophilia</i> | 14 | 0,00129  | 24 | 0,00000  |
| kuala_lumpur | <i>Pseudomonas fluorescens</i>      | 17 | 0,00048  | 4  | 0,26736  |
| kuala_lumpur | <i>Staphylococcus epidermidis</i>   | 23 | 0,00014  | 10 | 0,00890  |
| kuala_lumpur | <i>Acinetobacter baumannii</i>      | 30 | 0,00003  | 21 | 0,00009  |
| kyiv         | <i>Acinetobacter baumannii</i>      | 4  | 0,29822  | 10 | 0,26061  |
| kyiv         | <i>Escherichia coli</i>             | 6  | 0,07665  | 15 | 0,07762  |



Table S3

|             |                                     |    |          |    |          |
|-------------|-------------------------------------|----|----------|----|----------|
| kyiv        | <i>Pseudomonas aeruginosa</i>       | 7  | 0,06321  | 14 | 0,21806  |
| kyiv        | <i>Stenotrophomonas maltophilia</i> | 9  | 0,04070  | 20 | 0,00492  |
| kyiv        | <i>Staphylococcus epidermidis</i>   | 24 | 0,00339  | 2  | 1,07761  |
| kyiv        | <i>Pseudomonas fluorescens</i>      | 26 | 0,00298  | 8  | 0,31141  |
| kyiv        | <i>Enterococcus faecalis</i>        | 29 | 0,00179  | 28 | 0,00023  |
| kyiv        | <i>Staphylococcus aureus</i>        | 32 | 0,00095  | 3  | 0,54730  |
| lisbon      | <i>Stenotrophomonas maltophilia</i> | 2  | 1,47592  | 21 | 0,01088  |
| lisbon      | <i>Acinetobacter baumannii</i>      | 3  | 0,77363  | 3  | 1,70853  |
| lisbon      | <i>Pseudomonas aeruginosa</i>       | 6  | 0,10960  | 2  | 2,05801  |
| lisbon      | <i>Enterococcus faecalis</i>        | 7  | 0,07494  | 5  | 0,46307  |
| lisbon      | <i>Escherichia coli</i>             | 8  | 0,04810  | 24 | 0,00497  |
| lisbon      | <i>Staphylococcus epidermidis</i>   | 15 | 0,01086  | 9  | 0,12975  |
| lisbon      | <i>Pseudomonas fluorescens</i>      | 16 | 0,01068  | 1  | 2,23028  |
| lisbon      | <i>Staphylococcus aureus</i>        | 17 | 0,00582  | 7  | 0,31662  |
| london      | <i>Pseudomonas aeruginosa</i>       | 1  | 5,04627  | 2  | 1,28101  |
| london      | <i>Staphylococcus aureus</i>        | 3  | 3,75576  | 6  | 0,68081  |
| london      | <i>Enterococcus faecalis</i>        | 4  | 3,59397  | 9  | 0,32270  |
| london      | <i>Escherichia coli</i>             | 5  | 3,24318  | 19 | 0,10813  |
| london      | <i>Stenotrophomonas maltophilia</i> | 14 | 0,18658  | 22 | 0,05304  |
| london      | <i>Pseudomonas fluorescens</i>      | 15 | 0,06375  | 5  | 0,90036  |
| london      | <i>Staphylococcus epidermidis</i>   | 19 | 0,02314  | 3  | 1,23459  |
| london      | <i>Acinetobacter baumannii</i>      | 24 | 0,00409  | 16 | 0,16042  |
| marseille   | <i>Stenotrophomonas maltophilia</i> | 4  | 0,06283  | 20 | 0,01158  |
| marseille   | <i>Pseudomonas aeruginosa</i>       | 6  | 0,05407  | 2  | 0,24244  |
| marseille   | <i>Acinetobacter baumannii</i>      | 9  | 0,03945  | 3  | 0,23120  |
| marseille   | <i>Staphylococcus epidermidis</i>   | 10 | 0,03041  | 6  | 0,12626  |
| marseille   | <i>Pseudomonas fluorescens</i>      | 16 | 0,01577  | 7  | 0,09790  |
| marseille   | <i>Escherichia coli</i>             | 17 | 0,01542  | 16 | 0,02734  |
| marseille   | <i>Staphylococcus aureus</i>        | 27 | 0,00396  | 5  | 0,16116  |
| marseille   | <i>Enterococcus faecalis</i>        | 32 | 0,00176  | 23 | 0,00535  |
| minneapolis | <i>Staphylococcus epidermidis</i>   | 1  | 22,18504 | 1  | 27,21991 |
| minneapolis | <i>Staphylococcus aureus</i>        | 5  | 0,99549  | 2  | 12,96274 |
| minneapolis | <i>Enterococcus faecalis</i>        | 7  | 0,07809  | 13 | 0,01223  |
| minneapolis | <i>Pseudomonas aeruginosa</i>       | 12 | 0,01170  | 5  | 0,11098  |

Table S3

|               |                                     |    |         |    |         |
|---------------|-------------------------------------|----|---------|----|---------|
| minneapolis   | <i>Stenotrophomonas maltophilia</i> | 14 | 0,00924 | 21 | 0,00209 |
| minneapolis   | <i>Escherichia coli</i>             | 21 | 0,00227 | 17 | 0,00412 |
| minneapolis   | <i>Pseudomonas fluorescens</i>      | 24 | 0,00182 | 4  | 0,13593 |
| minneapolis   | <i>Acinetobacter baumannii</i>      | 30 | 0,00030 | 19 | 0,00342 |
| naples        | <i>Staphylococcus epidermidis</i>   | 6  | 0,06313 | 2  | 1,54142 |
| naples        | <i>Stenotrophomonas maltophilia</i> | 7  | 0,03375 | 22 | 0,00263 |
| naples        | <i>Pseudomonas aeruginosa</i>       | 9  | 0,02645 | 6  | 0,24586 |
| naples        | <i>Escherichia coli</i>             | 10 | 0,01718 | 8  | 0,08005 |
| naples        | <i>Acinetobacter baumannii</i>      | 16 | 0,01183 | 5  | 0,53742 |
| naples        | <i>Staphylococcus aureus</i>        | 22 | 0,00762 | 4  | 0,89072 |
| naples        | <i>Pseudomonas fluorescens</i>      | 23 | 0,00643 | 7  | 0,16003 |
| naples        | <i>Enterococcus faecalis</i>        | 25 | 0,00367 | 33 | 0,00000 |
| new_york_city | <i>Stenotrophomonas maltophilia</i> | 4  | 0,50966 | 19 | 0,03671 |
| new_york_city | <i>Acinetobacter baumannii</i>      | 6  | 0,23944 | 7  | 0,58176 |
| new_york_city | <i>Enterococcus faecalis</i>        | 8  | 0,20652 | 11 | 0,21213 |
| new_york_city | <i>Pseudomonas fluorescens</i>      | 9  | 0,17718 | 4  | 1,08560 |
| new_york_city | <i>Pseudomonas aeruginosa</i>       | 12 | 0,11191 | 2  | 1,32995 |
| new_york_city | <i>Escherichia coli</i>             | 14 | 0,04720 | 25 | 0,01978 |
| new_york_city | <i>Staphylococcus epidermidis</i>   | 16 | 0,04262 | 9  | 0,40155 |
| new_york_city | <i>Staphylococcus aureus</i>        | 17 | 0,04037 | 6  | 0,68677 |
| offa          | <i>Escherichia coli</i>             | 3  | 0,42705 | 8  | 0,14852 |
| offa          | <i>Stenotrophomonas maltophilia</i> | 4  | 0,37813 | 12 | 0,07418 |
| offa          | <i>Pseudomonas aeruginosa</i>       | 5  | 0,08176 | 1  | 3,51296 |
| offa          | <i>Acinetobacter baumannii</i>      | 7  | 0,03776 | 9  | 0,13290 |
| offa          | <i>Pseudomonas fluorescens</i>      | 12 | 0,00429 | 2  | 1,72508 |
| offa          | <i>Enterococcus faecalis</i>        | 15 | 0,00292 | 21 | 0,00576 |
| offa          | <i>Staphylococcus epidermidis</i>   | 21 | 0,00092 | 19 | 0,01144 |
| offa          | <i>Staphylococcus aureus</i>        | 22 | 0,00076 | 23 | 0,00407 |
| oslo          | <i>Stenotrophomonas maltophilia</i> | 2  | 0,21660 | 17 | 0,01163 |
| oslo          | <i>Staphylococcus epidermidis</i>   | 4  | 0,02196 | 1  | 0,49688 |
| oslo          | <i>Pseudomonas aeruginosa</i>       | 12 | 0,00931 | 8  | 0,15437 |
| oslo          | <i>Pseudomonas fluorescens</i>      | 14 | 0,00791 | 7  | 0,17267 |
| oslo          | <i>Acinetobacter baumannii</i>      | 19 | 0,00416 | 10 | 0,06730 |
| oslo          | <i>Escherichia coli</i>             | 21 | 0,00301 | 34 | 0,00000 |

Table S3

|                |                              |    |          |    |          |
|----------------|------------------------------|----|----------|----|----------|
| oslo           | Staphylococcus aureus        | 23 | 0,00202  | 3  | 0,41477  |
| oslo           | Enterococcus faecalis        | 30 | 0,00049  | 23 | 0,00174  |
| others         | Enterococcus faecalis        | 1  | 47,54807 | 4  | 1,41964  |
| others         | Pseudomonas aeruginosa       | 2  | 37,70298 | 1  | 11,53677 |
| others         | Staphylococcus aureus        | 3  | 16,12318 | 3  | 4,44067  |
| others         | Escherichia coli             | 6  | 9,92451  | 7  | 0,51513  |
| others         | Staphylococcus epidermidis   | 9  | 4,28076  | 2  | 11,31146 |
| others         | Stenotrophomonas maltophilia | 18 | 0,02135  | 21 | 0,00187  |
| others         | Pseudomonas fluorescens      | 19 | 0,01486  | 6  | 0,61556  |
| others         | Acinetobacter baumannii      | 26 | 0,00379  | 16 | 0,00879  |
| porto          | Stenotrophomonas maltophilia | 2  | 0,19856  | 20 | 0,00776  |
| porto          | Staphylococcus epidermidis   | 4  | 0,09565  | 1  | 3,68248  |
| porto          | Acinetobacter baumannii      | 10 | 0,02167  | 12 | 0,18334  |
| porto          | Pseudomonas aeruginosa       | 12 | 0,01560  | 4  | 0,67798  |
| porto          | Escherichia coli             | 13 | 0,01161  | 23 | 0,00343  |
| porto          | Staphylococcus aureus        | 15 | 0,00994  | 2  | 2,21520  |
| porto          | Pseudomonas fluorescens      | 19 | 0,00688  | 3  | 0,83341  |
| porto          | Enterococcus faecalis        | 31 | 0,00114  | 28 | 0,00096  |
| rio_de_janeirc | Acinetobacter baumannii      | 4  | 0,19590  | 1  | 1,84482  |
| rio_de_janeirc | Staphylococcus epidermidis   | 7  | 0,08100  | 2  | 1,78515  |
| rio_de_janeirc | Enterococcus faecalis        | 8  | 0,07935  | 19 | 0,03369  |
| rio_de_janeirc | Escherichia coli             | 11 | 0,03538  | 15 | 0,04896  |
| rio_de_janeirc | Stenotrophomonas maltophilia | 13 | 0,02760  | 25 | 0,00785  |
| rio_de_janeirc | Pseudomonas aeruginosa       | 14 | 0,02330  | 5  | 0,66934  |
| rio_de_janeirc | Staphylococcus aureus        | 15 | 0,01933  | 3  | 1,77258  |
| rio_de_janeirc | Pseudomonas fluorescens      | 23 | 0,00416  | 6  | 0,56701  |
| santiago       | Pseudomonas aeruginosa       | 4  | 0,03697  | 6  | 0,57349  |
| santiago       | Staphylococcus epidermidis   | 5  | 0,02854  | 1  | 2,62716  |
| santiago       | Escherichia coli             | 6  | 0,02416  | 16 | 0,03206  |
| santiago       | Acinetobacter baumannii      | 9  | 0,01892  | 2  | 1,46137  |
| santiago       | Stenotrophomonas maltophilia | 10 | 0,01814  | 27 | 0,00588  |
| santiago       | Staphylococcus aureus        | 11 | 0,01283  | 3  | 1,01904  |
| santiago       | Pseudomonas fluorescens      | 14 | 0,01104  | 5  | 0,70206  |
| santiago       | Enterococcus faecalis        | 26 | 0,00311  | 24 | 0,00717  |

Table S3

|           |                              |    |         |    |         |
|-----------|------------------------------|----|---------|----|---------|
| sao paulo | Enterococcus faecalis        | 3  | 0,49891 | 10 | 0,13821 |
| sao paulo | Pseudomonas aeruginosa       | 6  | 0,34283 | 4  | 0,40723 |
| sao paulo | Escherichia coli             | 9  | 0,05109 | 14 | 0,01855 |
| sao paulo | Staphylococcus epidermidis   | 10 | 0,03492 | 1  | 4,85565 |
| sao paulo | Staphylococcus aureus        | 15 | 0,02394 | 2  | 1,13767 |
| sao paulo | Stenotrophomonas maltophilia | 18 | 0,01677 | 21 | 0,00106 |
| sao paulo | Acinetobacter baumannii      | 23 | 0,00923 | 13 | 0,03691 |
| sao paulo | Pseudomonas fluorescens      | 27 | 0,00391 | 3  | 0,69175 |
| seoul     | Pseudomonas aeruginosa       | 3  | 0,06907 | 10 | 0,34839 |
| seoul     | Staphylococcus epidermidis   | 9  | 0,02340 | 1  | 2,42021 |
| seoul     | Stenotrophomonas maltophilia | 10 | 0,02167 | 23 | 0,00108 |
| seoul     | Acinetobacter baumannii      | 11 | 0,01479 | 12 | 0,02562 |
| seoul     | Escherichia coli             | 17 | 0,00941 | 13 | 0,01487 |
| seoul     | Pseudomonas fluorescens      | 20 | 0,00771 | 4  | 0,73770 |
| seoul     | Staphylococcus aureus        | 23 | 0,00469 | 2  | 1,31292 |
| seoul     | Enterococcus faecalis        | 32 | 0,00269 | 29 | 0,00000 |
| singapore | Escherichia coli             | 3  | 0,31923 | 9  | 0,13262 |
| singapore | Acinetobacter baumannii      | 4  | 0,26913 | 3  | 0,37242 |
| singapore | Stenotrophomonas maltophilia | 8  | 0,07942 | 17 | 0,01145 |
| singapore | Pseudomonas aeruginosa       | 10 | 0,06437 | 6  | 0,21671 |
| singapore | Staphylococcus epidermidis   | 18 | 0,01356 | 1  | 0,43078 |
| singapore | Pseudomonas fluorescens      | 21 | 0,01000 | 2  | 0,42984 |
| singapore | Enterococcus faecalis        | 22 | 0,00824 | 18 | 0,00731 |
| singapore | Staphylococcus aureus        | 27 | 0,00201 | 5  | 0,22531 |
| sofia     | Stenotrophomonas maltophilia | 4  | 0,19107 | 21 | 0,01591 |
| sofia     | Pseudomonas fluorescens      | 5  | 0,12091 | 7  | 0,29806 |
| sofia     | Staphylococcus epidermidis   | 11 | 0,03052 | 6  | 0,33165 |
| sofia     | Pseudomonas aeruginosa       | 12 | 0,03040 | 4  | 0,54884 |
| sofia     | Acinetobacter baumannii      | 16 | 0,02050 | 3  | 1,08383 |
| sofia     | Escherichia coli             | 22 | 0,01039 | 15 | 0,03073 |
| sofia     | Staphylococcus aureus        | 26 | 0,00602 | 5  | 0,36382 |
| sofia     | Enterococcus faecalis        | 34 | 0,00077 | 28 | 0,00373 |
| taipei    | Stenotrophomonas maltophilia | 3  | 0,11351 | 13 | 0,06065 |
| taipei    | Pseudomonas aeruginosa       | 5  | 0,04199 | 7  | 0,13700 |

Table S3

|        |                                     |    |         |    |         |
|--------|-------------------------------------|----|---------|----|---------|
| taipei | <i>Acinetobacter baumannii</i>      | 16 | 0,00644 | 14 | 0,03088 |
| taipei | <i>Pseudomonas fluorescens</i>      | 18 | 0,00349 | 3  | 0,34388 |
| taipei | <i>Escherichia coli</i>             | 19 | 0,00220 | 21 | 0,00206 |
| taipei | <i>Staphylococcus epidermidis</i>   | 22 | 0,00182 | 2  | 0,57050 |
| taipei | <i>Staphylococcus aureus</i>        | 29 | 0,00046 | 6  | 0,17561 |
| taipei | <i>Enterococcus faecalis</i>        | 32 | 0,00008 | 30 | 0,00000 |
| tokyo  | <i>Staphylococcus epidermidis</i>   | 3  | 0,29841 | 2  | 4,61402 |
| tokyo  | <i>Pseudomonas fluorescens</i>      | 5  | 0,10028 | 7  | 0,49164 |
| tokyo  | <i>Staphylococcus aureus</i>        | 7  | 0,07276 | 1  | 4,85441 |
| tokyo  | <i>Acinetobacter baumannii</i>      | 8  | 0,06761 | 3  | 1,71600 |
| tokyo  | <i>Pseudomonas aeruginosa</i>       | 13 | 0,02354 | 4  | 0,69752 |
| tokyo  | <i>Escherichia coli</i>             | 15 | 0,02135 | 20 | 0,04159 |
| tokyo  | <i>Stenotrophomonas maltophilia</i> | 16 | 0,01910 | 23 | 0,01204 |
| tokyo  | <i>Enterococcus faecalis</i>        | 31 | 0,00342 | 26 | 0,00678 |
| vienna | <i>Stenotrophomonas maltophilia</i> | 3  | 0,15312 | 8  | 0,08815 |
| vienna | <i>Pseudomonas aeruginosa</i>       | 5  | 0,08412 | 1  | 0,83098 |
| vienna | <i>Pseudomonas fluorescens</i>      | 6  | 0,05431 | 4  | 0,29058 |
| vienna | <i>Acinetobacter baumannii</i>      | 13 | 0,01639 | 2  | 0,50323 |
| vienna | <i>Escherichia coli</i>             | 20 | 0,00460 | 14 | 0,02620 |
| vienna | <i>Staphylococcus epidermidis</i>   | 21 | 0,00403 | 6  | 0,16189 |
| vienna | <i>Staphylococcus aureus</i>        | 28 | 0,00095 | 7  | 0,13937 |
| vienna | <i>Enterococcus faecalis</i>        | 34 | 0,00023 | 26 | 0,00000 |
| zurich | <i>Stenotrophomonas maltophilia</i> | 1  | 1,86656 | 12 | 0,01482 |
| zurich | <i>Pseudomonas aeruginosa</i>       | 7  | 0,02790 | 1  | 0,93058 |
| zurich | <i>Escherichia coli</i>             | 16 | 0,00265 | 8  | 0,03456 |
| zurich | <i>Pseudomonas fluorescens</i>      | 18 | 0,00244 | 3  | 0,19484 |
| zurich | <i>Acinetobacter baumannii</i>      | 21 | 0,00093 | 4  | 0,07697 |
| zurich | <i>Staphylococcus epidermidis</i>   | 25 | 0,00018 | 5  | 0,05728 |
| zurich | <i>Staphylococcus aureus</i>        | 26 | 0,00018 | 7  | 0,05156 |
| zurich | <i>Enterococcus faecalis</i>        | 27 | 0,00015 | 21 | 0,00071 |

Table S4

**Supplementary Table S4. Rank of PPG hosts predicted by CRISPR.**

| City     | Bacteria/ PPG Host              | Bacteria abundance rank | Bacteria abundance (%) | PPGs abundance rank | PPGs abundance (%) |
|----------|---------------------------------|-------------------------|------------------------|---------------------|--------------------|
| auckland | <i>Pseudomonas aeruginosa</i>   | 3                       | 0,08573                | 15                  | 0,85106            |
| auckland | <i>Pseudomonas fluorescens</i>  | 4                       | 0,08441                | 8                   | 2,19907            |
| auckland | <i>Pseudomonas stutzeri</i>     | 5                       | 0,04574                | 13                  | 0,97370            |
| auckland | <i>Xanthomonas campestris</i>   | 6                       | 0,03666                | 7                   | 2,29225            |
| auckland | <i>Escherichia coli</i>         | 7                       | 0,02382                | 27                  | 0,44122            |
| auckland | <i>Salmonella enterica</i>      | 9                       | 0,01787                | 6                   | 2,34556            |
| auckland | <i>Acinetobacter baumannii</i>  | 10                      | 0,01772                | 14                  | 0,90908            |
| auckland | <i>Klebsiella pneumoniae</i>    | 11                      | 0,01650                | 19                  | 0,70092            |
| auckland | <i>Acinetobacter junii</i>      | 13                      | 0,00634                | 232                 | 0,00000            |
| auckland | <i>Moraxella osloensis</i>      | 14                      | 0,00267                | 149                 | 0,00363            |
| auckland | <i>Rothia mucilaginosa</i>      | 21                      | 0,00104                | 156                 | 0,00187            |
| auckland | <i>Listeria monocytogenes</i>   | 22                      | 0,00102                | 4                   | 2,60886            |
| auckland | <i>Enterococcus faecalis</i>    | 25                      | 0,00058                | 68                  | 0,10899            |
| auckland | <i>Pseudomonas balearica</i>    | 36                      | 0,00000                | 43                  | 0,23392            |
| auckland | <i>Cutibacterium granulosum</i> | 55                      | 0,00000                | 64                  | 0,12470            |
| auckland | <i>Micrococcus luteus</i>       | 69                      | 0,00000                | 86                  | 0,08102            |
| berlin   | <i>Pseudomonas stutzeri</i>     | 1                       | 4,52229                | 1                   | 6,55877            |
| berlin   | <i>Moraxella osloensis</i>      | 5                       | 0,13890                | 55                  | 0,26791            |
| berlin   | <i>Pseudomonas aeruginosa</i>   | 6                       | 0,09053                | 9                   | 1,59055            |
| berlin   | <i>Acinetobacter baumannii</i>  | 10                      | 0,03613                | 17                  | 0,94560            |
| berlin   | <i>Escherichia coli</i>         | 12                      | 0,02049                | 67                  | 0,13199            |
| berlin   | <i>Acinetobacter junii</i>      | 13                      | 0,01830                | 125                 | 0,01893            |
| berlin   | <i>Rothia mucilaginosa</i>      | 14                      | 0,01808                | 103                 | 0,03887            |
| berlin   | <i>Salmonella enterica</i>      | 16                      | 0,01418                | 25                  | 0,64757            |
| berlin   | <i>Klebsiella pneumoniae</i>    | 17                      | 0,01301                | 22                  | 0,69782            |
| berlin   | <i>Pseudomonas fluorescens</i>  | 21                      | 0,00954                | 15                  | 1,05155            |
| berlin   | <i>Xanthomonas campestris</i>   | 24                      | 0,00670                | 3                   | 4,77459            |
| berlin   | <i>Enterococcus faecalis</i>    | 26                      | 0,00362                | 29                  | 0,48392            |
| berlin   | <i>Listeria monocytogenes</i>   | 30                      | 0,00210                | 162                 | 0,00778            |
| berlin   | <i>Pseudomonas balearica</i>    | 52                      | 0,00000                | 5                   | 2,70975            |

Table S4

|           |                                 |    |         |     |         |
|-----------|---------------------------------|----|---------|-----|---------|
| berlin    | <i>Micrococcus luteus</i>       | 66 | 0,00000 | 6   | 2,25634 |
| berlin    | <i>Cutibacterium granulosum</i> | 68 | 0,00000 | 31  | 0,45049 |
| bogota    | <i>Pseudomonas fluorescens</i>  | 2  | 0,17466 | 10  | 1,55469 |
| bogota    | <i>Pseudomonas stutzeri</i>     | 4  | 0,10621 | 6   | 1,95882 |
| bogota    | <i>Moraxella osloensis</i>      | 6  | 0,06720 | 29  | 0,48058 |
| bogota    | <i>Acinetobacter baumannii</i>  | 7  | 0,03153 | 4   | 2,52002 |
| bogota    | <i>Pseudomonas aeruginosa</i>   | 9  | 0,02862 | 22  | 0,84119 |
| bogota    | <i>Klebsiella pneumoniae</i>    | 10 | 0,02302 | 15  | 1,10017 |
| bogota    | <i>Escherichia coli</i>         | 12 | 0,01959 | 30  | 0,44807 |
| bogota    | <i>Rothia mucilaginosa</i>      | 19 | 0,01154 | 109 | 0,05740 |
| bogota    | <i>Salmonella enterica</i>      | 20 | 0,00908 | 13  | 1,46765 |
| bogota    | <i>Acinetobacter junii</i>      | 28 | 0,00537 | 149 | 0,02330 |
| bogota    | <i>Enterococcus faecalis</i>    | 29 | 0,00495 | 49  | 0,25701 |
| bogota    | <i>Xanthomonas campestris</i>   | 31 | 0,00487 | 11  | 1,48748 |
| bogota    | <i>Listeria monocytogenes</i>   | 33 | 0,00128 | 191 | 0,00754 |
| bogota    | <i>Pseudomonas balearica</i>    | 63 | 0,00000 | 21  | 0,88108 |
| bogota    | <i>Micrococcus luteus</i>       | 65 | 0,00000 | 39  | 0,38170 |
| bogota    | <i>Cutibacterium granulosum</i> | 70 | 0,00000 | 12  | 1,46911 |
| cairngorm | <i>Pseudomonas aeruginosa</i>   | 2  | 0,22953 | 38  | 0,40364 |
| cairngorm | <i>Listeria monocytogenes</i>   | 4  | 0,16912 | 47  | 0,21200 |
| cairngorm | <i>Enterococcus faecalis</i>    | 6  | 0,14260 | 9   | 0,98259 |
| cairngorm | <i>Salmonella enterica</i>      | 8  | 0,09895 | 16  | 0,78112 |
| cairngorm | <i>Escherichia coli</i>         | 9  | 0,09505 | 46  | 0,24652 |
| cairngorm | <i>Moraxella osloensis</i>      | 10 | 0,02972 | 64  | 0,03591 |
| cairngorm | <i>Pseudomonas stutzeri</i>     | 13 | 0,00955 | 42  | 0,29979 |
| cairngorm | <i>Acinetobacter baumannii</i>  | 18 | 0,00387 | 54  | 0,09933 |
| cairngorm | <i>Rothia mucilaginosa</i>      | 22 | 0,00258 | 86  | 0,01005 |
| cairngorm | <i>Xanthomonas campestris</i>   | 25 | 0,00195 | 12  | 0,85223 |
| cairngorm | <i>Pseudomonas fluorescens</i>  | 27 | 0,00180 | 50  | 0,10774 |
| cairngorm | <i>Acinetobacter junii</i>      | 29 | 0,00105 | 214 | 0,00000 |
| cairngorm | <i>Klebsiella pneumoniae</i>    | 33 | 0,00054 | 5   | 1,23322 |
| cairngorm | <i>Pseudomonas balearica</i>    | 37 | 0,00000 | 73  | 0,02076 |
| cairngorm | <i>Cutibacterium granulosum</i> | 51 | 0,00000 | 15  | 0,79188 |
| cairngorm | <i>Micrococcus luteus</i>       | 70 | 0,00000 | 11  | 0,88378 |

Table S4

|           |                                 |    |         |     |         |
|-----------|---------------------------------|----|---------|-----|---------|
| denver    | <i>Moraxella osloensis</i>      | 5  | 0,03368 | 66  | 0,05404 |
| denver    | <i>Klebsiella pneumoniae</i>    | 7  | 0,02088 | 20  | 0,30137 |
| denver    | <i>Pseudomonas aeruginosa</i>   | 8  | 0,01474 | 35  | 0,12653 |
| denver    | <i>Pseudomonas fluorescens</i>  | 9  | 0,01181 | 16  | 0,36119 |
| denver    | <i>Pseudomonas stutzeri</i>     | 10 | 0,01010 | 31  | 0,14562 |
| denver    | <i>Acinetobacter baumannii</i>  | 11 | 0,00956 | 19  | 0,30748 |
| denver    | <i>Escherichia coli</i>         | 12 | 0,00827 | 71  | 0,04812 |
| denver    | <i>Rothia mucilaginosa</i>      | 14 | 0,00713 | 103 | 0,01743 |
| denver    | <i>Xanthomonas campestris</i>   | 21 | 0,00575 | 1   | 8,13530 |
| denver    | <i>Acinetobacter junii</i>      | 26 | 0,00198 | 223 | 0,00000 |
| denver    | <i>Enterococcus faecalis</i>    | 31 | 0,00132 | 60  | 0,06939 |
| denver    | <i>Salmonella enterica</i>      | 32 | 0,00096 | 23  | 0,21440 |
| denver    | <i>Listeria monocytogenes</i>   | 34 | 0,00057 | 175 | 0,00185 |
| denver    | <i>Pseudomonas balearica</i>    | 37 | 0,00000 | 52  | 0,08386 |
| denver    | <i>Cutibacterium granulosum</i> | 56 | 0,00000 | 18  | 0,31151 |
| denver    | <i>Micrococcus luteus</i>       | 68 | 0,00000 | 11  | 0,56875 |
| doha      | <i>Pseudomonas aeruginosa</i>   | 2  | 3,99929 | 2   | 3,93636 |
| doha      | <i>Salmonella enterica</i>      | 3  | 2,87261 | 3   | 3,29462 |
| doha      | <i>Escherichia coli</i>         | 4  | 2,47975 | 7   | 2,08987 |
| doha      | <i>Pseudomonas stutzeri</i>     | 5  | 0,99980 | 4   | 3,21919 |
| doha      | <i>Enterococcus faecalis</i>    | 7  | 0,17743 | 16  | 0,74048 |
| doha      | <i>Moraxella osloensis</i>      | 11 | 0,07067 | 75  | 0,03734 |
| doha      | <i>Pseudomonas fluorescens</i>  | 12 | 0,03567 | 30  | 0,51092 |
| doha      | <i>Listeria monocytogenes</i>   | 14 | 0,02491 | 82  | 0,02663 |
| doha      | <i>Acinetobacter baumannii</i>  | 15 | 0,02114 | 56  | 0,20663 |
| doha      | <i>Acinetobacter junii</i>      | 16 | 0,01413 | 148 | 0,00197 |
| doha      | <i>Klebsiella pneumoniae</i>    | 19 | 0,00830 | 13  | 0,94099 |
| doha      | <i>Rothia mucilaginosa</i>      | 24 | 0,00184 | 130 | 0,00503 |
| doha      | <i>Xanthomonas campestris</i>   | 27 | 0,00116 | 8   | 1,48539 |
| doha      | <i>Pseudomonas balearica</i>    | 37 | 0,00000 | 5   | 2,88663 |
| doha      | <i>Cutibacterium granulosum</i> | 52 | 0,00000 | 26  | 0,55770 |
| doha      | <i>Micrococcus luteus</i>       | 71 | 0,00000 | 48  | 0,32858 |
| fairbanks | <i>Moraxella osloensis</i>      | 7  | 0,07937 | 30  | 0,40549 |
| fairbanks | <i>Klebsiella pneumoniae</i>    | 10 | 0,04040 | 20  | 0,78527 |



Table S4

|           |                                 |    |         |     |         |
|-----------|---------------------------------|----|---------|-----|---------|
| fairbanks | <i>Escherichia coli</i>         | 12 | 0,02799 | 64  | 0,13365 |
| fairbanks | <i>Salmonella enterica</i>      | 13 | 0,01847 | 32  | 0,37813 |
| fairbanks | <i>Pseudomonas fluorescens</i>  | 14 | 0,01791 | 8   | 1,53401 |
| fairbanks | <i>Pseudomonas stutzeri</i>     | 15 | 0,01412 | 35  | 0,31945 |
| fairbanks | <i>Pseudomonas aeruginosa</i>   | 16 | 0,01154 | 40  | 0,24254 |
| fairbanks | <i>Acinetobacter baumannii</i>  | 18 | 0,00979 | 25  | 0,68835 |
| fairbanks | <i>Rothia mucilaginosa</i>      | 20 | 0,00482 | 128 | 0,01998 |
| fairbanks | <i>Xanthomonas campestris</i>   | 21 | 0,00478 | 1   | 3,33440 |
| fairbanks | <i>Enterococcus faecalis</i>    | 27 | 0,00174 | 42  | 0,23730 |
| fairbanks | <i>Acinetobacter junii</i>      | 29 | 0,00112 | 110 | 0,03096 |
| fairbanks | <i>Listeria monocytogenes</i>   | 32 | 0,00072 | 205 | 0,00097 |
| fairbanks | <i>Pseudomonas balearica</i>    | 51 | 0,00000 | 60  | 0,14537 |
| fairbanks | <i>Cutibacterium granulosum</i> | 57 | 0,00000 | 72  | 0,11812 |
| fairbanks | <i>Micrococcus luteus</i>       | 68 | 0,00000 | 38  | 0,24919 |
| hamilton  | <i>Pseudomonas fluorescens</i>  | 3  | 0,20556 | 4   | 4,67082 |
| hamilton  | <i>Pseudomonas aeruginosa</i>   | 4  | 0,08008 | 17  | 1,28133 |
| hamilton  | <i>Acinetobacter baumannii</i>  | 5  | 0,06056 | 24  | 0,80555 |
| hamilton  | <i>Escherichia coli</i>         | 7  | 0,05464 | 35  | 0,53520 |
| hamilton  | <i>Pseudomonas stutzeri</i>     | 8  | 0,04890 | 33  | 0,56056 |
| hamilton  | <i>Salmonella enterica</i>      | 9  | 0,04879 | 3   | 5,17294 |
| hamilton  | <i>Xanthomonas campestris</i>   | 10 | 0,03839 | 2   | 5,32160 |
| hamilton  | <i>Klebsiella pneumoniae</i>    | 11 | 0,03372 | 7   | 2,50113 |
| hamilton  | <i>Enterococcus faecalis</i>    | 12 | 0,01254 | 65  | 0,09989 |
| hamilton  | <i>Acinetobacter junii</i>      | 13 | 0,00868 | 187 | 0,00014 |
| hamilton  | <i>Moraxella osloensis</i>      | 14 | 0,00358 | 123 | 0,00982 |
| hamilton  | <i>Listeria monocytogenes</i>   | 22 | 0,00064 | 152 | 0,00222 |
| hamilton  | <i>Rothia mucilaginosa</i>      | 30 | 0,00004 | 199 | 0,00005 |
| hamilton  | <i>Pseudomonas balearica</i>    | 37 | 0,00000 | 49  | 0,32604 |
| hamilton  | <i>Cutibacterium granulosum</i> | 55 | 0,00000 | 128 | 0,00889 |
| hamilton  | <i>Micrococcus luteus</i>       | 70 | 0,00000 | 135 | 0,00792 |
| hanoi     | <i>Escherichia coli</i>         | 1  | 1,17647 | 5   | 3,73438 |
| hanoi     | <i>Moraxella osloensis</i>      | 2  | 0,40188 | 14  | 1,00667 |
| hanoi     | <i>Acinetobacter baumannii</i>  | 5  | 0,06655 | 9   | 1,72548 |
| hanoi     | <i>Acinetobacter junii</i>      | 6  | 0,06102 | 93  | 0,02855 |

Table S4

|           |                                 |    |         |     |          |
|-----------|---------------------------------|----|---------|-----|----------|
| hanoi     | <i>Klebsiella pneumoniae</i>    | 8  | 0,03840 | 21  | 0,42399  |
| hanoi     | <i>Pseudomonas aeruginosa</i>   | 10 | 0,01564 | 36  | 0,16365  |
| hanoi     | <i>Xanthomonas campestris</i>   | 13 | 0,00963 | 25  | 0,28410  |
| hanoi     | <i>Enterococcus faecalis</i>    | 14 | 0,00898 | 34  | 0,16918  |
| hanoi     | <i>Rothia mucilaginosa</i>      | 16 | 0,00764 | 79  | 0,04070  |
| hanoi     | <i>Pseudomonas stutzeri</i>     | 18 | 0,00543 | 41  | 0,13940  |
| hanoi     | <i>Pseudomonas fluorescens</i>  | 27 | 0,00167 | 8   | 1,74143  |
| hanoi     | <i>Salmonella enterica</i>      | 30 | 0,00134 | 4   | 4,01262  |
| hanoi     | <i>Listeria monocytogenes</i>   | 32 | 0,00084 | 163 | 0,00411  |
| hanoi     | <i>Pseudomonas balearica</i>    | 45 | 0,00000 | 66  | 0,06015  |
| hanoi     | <i>Cutibacterium granulorum</i> | 53 | 0,00000 | 147 | 0,00640  |
| hanoi     | <i>Micrococcus luteus</i>       | 70 | 0,00000 | 43  | 0,13482  |
| hong_kong | <i>Moraxella osloensis</i>      | 2  | 0,23359 | 38  | 0,22450  |
| hong_kong | <i>Pseudomonas aeruginosa</i>   | 4  | 0,07228 | 8   | 0,81921  |
| hong_kong | <i>Acinetobacter baumannii</i>  | 8  | 0,02743 | 16  | 0,48337  |
| hong_kong | <i>Pseudomonas stutzeri</i>     | 9  | 0,02576 | 33  | 0,28006  |
| hong_kong | <i>Xanthomonas campestris</i>   | 10 | 0,02401 | 7   | 0,94496  |
| hong_kong | <i>Acinetobacter junii</i>      | 18 | 0,00810 | 116 | 0,01718  |
| hong_kong | <i>Rothia mucilaginosa</i>      | 19 | 0,00759 | 111 | 0,02016  |
| hong_kong | <i>Escherichia coli</i>         | 23 | 0,00485 | 93  | 0,03564  |
| hong_kong | <i>Klebsiella pneumoniae</i>    | 24 | 0,00467 | 4   | 2,34789  |
| hong_kong | <i>Pseudomonas fluorescens</i>  | 26 | 0,00275 | 17  | 0,48301  |
| hong_kong | <i>Enterococcus faecalis</i>    | 28 | 0,00131 | 55  | 0,13779  |
| hong_kong | <i>Salmonella enterica</i>      | 31 | 0,00050 | 21  | 0,43386  |
| hong_kong | <i>Listeria monocytogenes</i>   | 34 | 0,00009 | 251 | 0,00010  |
| hong_kong | <i>Pseudomonas balearica</i>    | 44 | 0,00000 | 25  | 0,35621  |
| hong_kong | <i>Cutibacterium granulorum</i> | 55 | 0,00000 | 36  | 0,24531  |
| hong_kong | <i>Micrococcus luteus</i>       | 70 | 0,00000 | 3   | 4,35046  |
| ilorin    | <i>Pseudomonas stutzeri</i>     | 1  | 6,19747 | 1   | 15,41225 |
| ilorin    | <i>Klebsiella pneumoniae</i>    | 3  | 0,20051 | 7   | 2,16928  |
| ilorin    | <i>Escherichia coli</i>         | 4  | 0,18761 | 42  | 0,26991  |
| ilorin    | <i>Pseudomonas aeruginosa</i>   | 5  | 0,09112 | 3   | 5,12184  |
| ilorin    | <i>Moraxella osloensis</i>      | 6  | 0,06750 | 116 | 0,04091  |
| ilorin    | <i>Acinetobacter baumannii</i>  | 7  | 0,06359 | 14  | 0,96001  |

Table S4

|              |                                 |    |          |     |          |
|--------------|---------------------------------|----|----------|-----|----------|
| ilorin       | <i>Salmonella enterica</i>      | 9  | 0,04110  | 4   | 2,72481  |
| ilorin       | <i>Acinetobacter junii</i>      | 11 | 0,01170  | 222 | 0,00189  |
| ilorin       | <i>Pseudomonas fluorescens</i>  | 16 | 0,00540  | 8   | 2,15907  |
| ilorin       | <i>Enterococcus faecalis</i>    | 17 | 0,00440  | 82  | 0,10435  |
| ilorin       | <i>Listeria monocytogenes</i>   | 18 | 0,00288  | 149 | 0,02131  |
| ilorin       | <i>Xanthomonas campestris</i>   | 20 | 0,00236  | 21  | 0,75109  |
| ilorin       | <i>Rothia mucilaginosa</i>      | 30 | 0,00047  | 202 | 0,00424  |
| ilorin       | <i>Pseudomonas balearica</i>    | 47 | 0,00000  | 2   | 7,67846  |
| ilorin       | <i>Micrococcus luteus</i>       | 69 | 0,00000  | 120 | 0,03842  |
| ilorin       | <i>Cutibacterium granulosum</i> | 70 | 0,00000  | 136 | 0,02848  |
| kuala_lumpur | <i>Pseudomonas aeruginosa</i>   | 1  | 43,17741 | 1   | 32,87846 |
| kuala_lumpur | <i>Salmonella enterica</i>      | 2  | 16,69142 | 3   | 11,64484 |
| kuala_lumpur | <i>Escherichia coli</i>         | 3  | 11,57926 | 2   | 12,76409 |
| kuala_lumpur | <i>Listeria monocytogenes</i>   | 5  | 0,94545  | 14  | 0,45021  |
| kuala_lumpur | <i>Enterococcus faecalis</i>    | 6  | 0,58779  | 10  | 0,96272  |
| kuala_lumpur | <i>Pseudomonas stutzeri</i>     | 11 | 0,00240  | 11  | 0,86990  |
| kuala_lumpur | <i>Klebsiella pneumoniae</i>    | 15 | 0,00076  | 20  | 0,28497  |
| kuala_lumpur | <i>Xanthomonas campestris</i>   | 16 | 0,00073  | 53  | 0,02860  |
| kuala_lumpur | <i>Pseudomonas fluorescens</i>  | 17 | 0,00048  | 8   | 1,30556  |
| kuala_lumpur | <i>Moraxella osloensis</i>      | 19 | 0,00036  | 300 | 0,00000  |
| kuala_lumpur | <i>Rothia mucilaginosa</i>      | 24 | 0,00012  | 161 | 0,00000  |
| kuala_lumpur | <i>Acinetobacter baumannii</i>  | 30 | 0,00003  | 107 | 0,00044  |
| kuala_lumpur | <i>Acinetobacter junii</i>      | 31 | 0,00002  | 193 | 0,00000  |
| kuala_lumpur | <i>Pseudomonas balearica</i>    | 35 | 0,00000  | 19  | 0,29001  |
| kuala_lumpur | <i>Cutibacterium granulosum</i> | 49 | 0,00000  | 251 | 0,00000  |
| kuala_lumpur | <i>Micrococcus luteus</i>       | 67 | 0,00000  | 94  | 0,00114  |
| kyiv         | <i>Moraxella osloensis</i>      | 1  | 1,91439  | 2   | 4,76673  |
| kyiv         | <i>Klebsiella pneumoniae</i>    | 2  | 1,24649  | 3   | 4,09160  |
| kyiv         | <i>Acinetobacter baumannii</i>  | 4  | 0,29822  | 15  | 1,11743  |
| kyiv         | <i>Escherichia coli</i>         | 6  | 0,07665  | 66  | 0,14511  |
| kyiv         | <i>Pseudomonas aeruginosa</i>   | 7  | 0,06321  | 71  | 0,11268  |
| kyiv         | <i>Salmonella enterica</i>      | 13 | 0,01718  | 4   | 3,28529  |
| kyiv         | <i>Xanthomonas campestris</i>   | 15 | 0,01342  | 27  | 0,67705  |
| kyiv         | <i>Acinetobacter junii</i>      | 16 | 0,01111  | 114 | 0,00934  |

Table S4

|        |                                 |    |         |     |          |
|--------|---------------------------------|----|---------|-----|----------|
| kyiv   | <i>Pseudomonas stutzeri</i>     | 17 | 0,01055 | 63  | 0,20856  |
| kyiv   | <i>Rothia mucilaginosa</i>      | 23 | 0,00459 | 119 | 0,00857  |
| kyiv   | <i>Pseudomonas fluorescens</i>  | 26 | 0,00298 | 30  | 0,51067  |
| kyiv   | <i>Enterococcus faecalis</i>    | 29 | 0,00179 | 61  | 0,23873  |
| kyiv   | <i>Listeria monocytogenes</i>   | 30 | 0,00137 | 217 | 0,00013  |
| kyiv   | <i>Pseudomonas balearica</i>    | 43 | 0,00000 | 94  | 0,02308  |
| kyiv   | <i>Cutibacterium granulosum</i> | 52 | 0,00000 | 35  | 0,39258  |
| kyiv   | <i>Micrococcus luteus</i>       | 71 | 0,00000 | 50  | 0,30237  |
| lisbon | <i>Pseudomonas stutzeri</i>     | 1  | 6,53718 | 1   | 10,98051 |
| lisbon | <i>Acinetobacter baumannii</i>  | 3  | 0,77363 | 4   | 5,19350  |
| lisbon | <i>Moraxella osloensis</i>      | 4  | 0,53827 | 39  | 0,39775  |
| lisbon | <i>Pseudomonas aeruginosa</i>   | 6  | 0,10960 | 5   | 4,37174  |
| lisbon | <i>Enterococcus faecalis</i>    | 7  | 0,07494 | 58  | 0,19315  |
| lisbon | <i>Escherichia coli</i>         | 8  | 0,04810 | 12  | 1,41448  |
| lisbon | <i>Klebsiella pneumoniae</i>    | 9  | 0,02830 | 19  | 0,80472  |
| lisbon | <i>Salmonella enterica</i>      | 10 | 0,02745 | 6   | 3,55380  |
| lisbon | <i>Xanthomonas campestris</i>   | 11 | 0,02237 | 23  | 0,64077  |
| lisbon | <i>Acinetobacter junii</i>      | 12 | 0,01633 | 119 | 0,02262  |
| lisbon | <i>Pseudomonas fluorescens</i>  | 16 | 0,01068 | 10  | 1,91723  |
| lisbon | <i>Rothia mucilaginosa</i>      | 19 | 0,00466 | 163 | 0,00583  |
| lisbon | <i>Listeria monocytogenes</i>   | 22 | 0,00172 | 150 | 0,01210  |
| lisbon | <i>Pseudomonas balearica</i>    | 37 | 0,00000 | 3   | 6,07824  |
| lisbon | <i>Cutibacterium granulosum</i> | 55 | 0,00000 | 133 | 0,01608  |
| lisbon | <i>Micrococcus luteus</i>       | 70 | 0,00000 | 115 | 0,02538  |
| london | <i>Pseudomonas aeruginosa</i>   | 1  | 5,04627 | 7   | 1,09211  |
| london | <i>Listeria monocytogenes</i>   | 2  | 4,10031 | 25  | 0,63378  |
| london | <i>Enterococcus faecalis</i>    | 4  | 3,59397 | 3   | 1,94957  |
| london | <i>Escherichia coli</i>         | 5  | 3,24318 | 34  | 0,44164  |
| london | <i>Salmonella enterica</i>      | 7  | 2,84640 | 22  | 0,74314  |
| london | <i>Pseudomonas stutzeri</i>     | 11 | 0,36400 | 1   | 2,21719  |
| london | <i>Pseudomonas fluorescens</i>  | 15 | 0,06375 | 21  | 0,77069  |
| london | <i>Moraxella osloensis</i>      | 20 | 0,01139 | 20  | 0,77279  |
| london | <i>Rothia mucilaginosa</i>      | 21 | 0,00758 | 136 | 0,03283  |
| london | <i>Xanthomonas campestris</i>   | 23 | 0,00448 | 2   | 2,02440  |

Table S4

|             |                                 |    |         |     |         |
|-------------|---------------------------------|----|---------|-----|---------|
| london      | <i>Acinetobacter baumannii</i>  | 24 | 0,00409 | 16  | 0,84502 |
| london      | <i>Klebsiella pneumoniae</i>    | 32 | 0,00156 | 9   | 1,01296 |
| london      | <i>Acinetobacter junii</i>      | 34 | 0,00145 | 173 | 0,00764 |
| london      | <i>Pseudomonas balearica</i>    | 42 | 0,00000 | 10  | 0,96846 |
| london      | <i>Cutibacterium granulosum</i> | 58 | 0,00000 | 56  | 0,25487 |
| london      | <i>Micrococcus luteus</i>       | 67 | 0,00000 | 12  | 0,91879 |
| marseille   | <i>Moraxella osloensis</i>      | 3  | 0,15305 | 34  | 0,14252 |
| marseille   | <i>Rothia mucilaginosa</i>      | 5  | 0,06153 | 40  | 0,10894 |
| marseille   | <i>Pseudomonas aeruginosa</i>   | 6  | 0,05407 | 11  | 0,46929 |
| marseille   | <i>Pseudomonas stutzeri</i>     | 7  | 0,05354 | 15  | 0,32113 |
| marseille   | <i>Acinetobacter baumannii</i>  | 9  | 0,03945 | 7   | 0,70525 |
| marseille   | <i>Xanthomonas campestris</i>   | 15 | 0,01675 | 20  | 0,21123 |
| marseille   | <i>Pseudomonas fluorescens</i>  | 16 | 0,01577 | 6   | 0,72850 |
| marseille   | <i>Escherichia coli</i>         | 17 | 0,01542 | 38  | 0,12259 |
| marseille   | <i>Klebsiella pneumoniae</i>    | 18 | 0,01504 | 23  | 0,19865 |
| marseille   | <i>Acinetobacter junii</i>      | 21 | 0,01007 | 121 | 0,01289 |
| marseille   | <i>Salmonella enterica</i>      | 28 | 0,00388 | 9   | 0,50272 |
| marseille   | <i>Enterococcus faecalis</i>    | 32 | 0,00176 | 68  | 0,04693 |
| marseille   | <i>Listeria monocytogenes</i>   | 34 | 0,00074 | 194 | 0,00185 |
| marseille   | <i>Pseudomonas balearica</i>    | 47 | 0,00000 | 30  | 0,16568 |
| marseille   | <i>Cutibacterium granulosum</i> | 54 | 0,00000 | 17  | 0,22237 |
| marseille   | <i>Micrococcus luteus</i>       | 71 | 0,00000 | 3   | 1,71408 |
| minneapolis | <i>Rothia mucilaginosa</i>      | 6  | 0,13942 | 7   | 3,14955 |
| minneapolis | <i>Enterococcus faecalis</i>    | 7  | 0,07809 | 19  | 0,22352 |
| minneapolis | <i>Pseudomonas aeruginosa</i>   | 12 | 0,01170 | 29  | 0,10709 |
| minneapolis | <i>Pseudomonas stutzeri</i>     | 13 | 0,00971 | 22  | 0,16805 |
| minneapolis | <i>Salmonella enterica</i>      | 19 | 0,00238 | 27  | 0,11524 |
| minneapolis | <i>Escherichia coli</i>         | 21 | 0,00227 | 79  | 0,02148 |
| minneapolis | <i>Xanthomonas campestris</i>   | 22 | 0,00222 | 12  | 0,71878 |
| minneapolis | <i>Moraxella osloensis</i>      | 23 | 0,00200 | 139 | 0,00318 |
| minneapolis | <i>Pseudomonas fluorescens</i>  | 24 | 0,00182 | 17  | 0,45894 |
| minneapolis | <i>Listeria monocytogenes</i>   | 26 | 0,00144 | 107 | 0,00895 |
| minneapolis | <i>Klebsiella pneumoniae</i>    | 28 | 0,00079 | 8   | 3,08158 |
| minneapolis | <i>Acinetobacter baumannii</i>  | 30 | 0,00030 | 72  | 0,02465 |

Table S4

|               |                                 |    |         |     |         |
|---------------|---------------------------------|----|---------|-----|---------|
| minneapolis   | <i>Acinetobacter junii</i>      | 34 | 0,00011 | 239 | 0,00000 |
| minneapolis   | <i>Pseudomonas balearica</i>    | 53 | 0,00000 | 41  | 0,07178 |
| minneapolis   | <i>Micrococcus luteus</i>       | 67 | 0,00000 | 28  | 0,11426 |
| minneapolis   | <i>Cutibacterium granulosum</i> | 69 | 0,00000 | 24  | 0,14791 |
| naples        | <i>Moraxella osloensis</i>      | 3  | 0,09374 | 28  | 0,20132 |
| naples        | <i>Pseudomonas stutzeri</i>     | 8  | 0,03235 | 18  | 0,51591 |
| naples        | <i>Pseudomonas aeruginosa</i>   | 9  | 0,02645 | 12  | 0,80814 |
| naples        | <i>Escherichia coli</i>         | 10 | 0,01718 | 48  | 0,10022 |
| naples        | <i>Acinetobacter baumannii</i>  | 16 | 0,01183 | 9   | 1,17351 |
| naples        | <i>Acinetobacter junii</i>      | 18 | 0,01154 | 163 | 0,00485 |
| naples        | <i>Rothia mucilaginosa</i>      | 19 | 0,01117 | 69  | 0,04915 |
| naples        | <i>Xanthomonas campestris</i>   | 21 | 0,00783 | 16  | 0,54700 |
| naples        | <i>Pseudomonas fluorescens</i>  | 23 | 0,00643 | 10  | 0,92241 |
| naples        | <i>Enterococcus faecalis</i>    | 25 | 0,00367 | 62  | 0,06919 |
| naples        | <i>Salmonella enterica</i>      | 26 | 0,00297 | 23  | 0,27629 |
| naples        | <i>Klebsiella pneumoniae</i>    | 29 | 0,00173 | 29  | 0,18680 |
| naples        | <i>Listeria monocytogenes</i>   | 35 | 0,00016 | 281 | 0,00000 |
| naples        | <i>Pseudomonas balearica</i>    | 47 | 0,00000 | 37  | 0,14756 |
| naples        | <i>Cutibacterium granulosum</i> | 58 | 0,00000 | 39  | 0,13553 |
| naples        | <i>Micrococcus luteus</i>       | 68 | 0,00000 | 15  | 0,59382 |
| new_york_city | <i>Pseudomonas stutzeri</i>     | 2  | 1,01739 | 1   | 4,28840 |
| new_york_city | <i>Acinetobacter baumannii</i>  | 6  | 0,23944 | 3   | 2,60855 |
| new_york_city | <i>Enterococcus faecalis</i>    | 8  | 0,20652 | 8   | 1,40663 |
| new_york_city | <i>Pseudomonas fluorescens</i>  | 9  | 0,17718 | 7   | 1,50503 |
| new_york_city | <i>Pseudomonas aeruginosa</i>   | 12 | 0,11191 | 9   | 1,20954 |
| new_york_city | <i>Escherichia coli</i>         | 14 | 0,04720 | 38  | 0,38183 |
| new_york_city | <i>Moraxella osloensis</i>      | 15 | 0,04262 | 18  | 0,93274 |
| new_york_city | <i>Salmonella enterica</i>      | 18 | 0,03054 | 16  | 1,05024 |
| new_york_city | <i>Listeria monocytogenes</i>   | 19 | 0,02107 | 48  | 0,30442 |
| new_york_city | <i>Klebsiella pneumoniae</i>    | 20 | 0,01869 | 22  | 0,64894 |
| new_york_city | <i>Acinetobacter junii</i>      | 22 | 0,01444 | 185 | 0,01838 |
| new_york_city | <i>Xanthomonas campestris</i>   | 23 | 0,00822 | 4   | 2,11218 |
| new_york_city | <i>Rothia mucilaginosa</i>      | 26 | 0,00609 | 173 | 0,02520 |
| new_york_city | <i>Pseudomonas balearica</i>    | 41 | 0,00000 | 5   | 2,04452 |

Table S4

|               |                                 |    |         |     |          |
|---------------|---------------------------------|----|---------|-----|----------|
| new_york_city | <i>Micrococcus luteus</i>       | 67 | 0,00000 | 70  | 0,16110  |
| new_york_city | <i>Cutibacterium granulosum</i> | 71 | 0,00000 | 151 | 0,03871  |
| offa          | <i>Pseudomonas stutzeri</i>     | 1  | 4,30273 | 1   | 13,26220 |
| offa          | <i>Klebsiella pneumoniae</i>    | 2  | 1,02931 | 7   | 2,16938  |
| offa          | <i>Escherichia coli</i>         | 3  | 0,42705 | 20  | 0,89874  |
| offa          | <i>Pseudomonas aeruginosa</i>   | 5  | 0,08176 | 4   | 3,90077  |
| offa          | <i>Salmonella enterica</i>      | 6  | 0,05196 | 3   | 4,14323  |
| offa          | <i>Acinetobacter baumannii</i>  | 7  | 0,03776 | 29  | 0,58623  |
| offa          | <i>Acinetobacter junii</i>      | 11 | 0,01056 | 161 | 0,00490  |
| offa          | <i>Pseudomonas fluorescens</i>  | 12 | 0,00429 | 10  | 1,70458  |
| offa          | <i>Xanthomonas campestris</i>   | 13 | 0,00353 | 30  | 0,58480  |
| offa          | <i>Moraxella osloensis</i>      | 14 | 0,00296 | 172 | 0,00276  |
| offa          | <i>Enterococcus faecalis</i>    | 15 | 0,00292 | 72  | 0,10221  |
| offa          | <i>Listeria monocytogenes</i>   | 17 | 0,00224 | 182 | 0,00186  |
| offa          | <i>Rothia mucilaginosa</i>      | 32 | 0,00008 | 244 | 0,00004  |
| offa          | <i>Pseudomonas balearica</i>    | 37 | 0,00000 | 2   | 6,68918  |
| offa          | <i>Cutibacterium granulosum</i> | 53 | 0,00000 | 170 | 0,00288  |
| offa          | <i>Micrococcus luteus</i>       | 70 | 0,00000 | 204 | 0,00043  |
| oslo          | <i>Moraxella osloensis</i>      | 5  | 0,02138 | 77  | 0,04076  |
| oslo          | <i>Pseudomonas stutzeri</i>     | 10 | 0,00947 | 30  | 0,17046  |
| oslo          | <i>Pseudomonas aeruginosa</i>   | 12 | 0,00931 | 41  | 0,11858  |
| oslo          | <i>Pseudomonas fluorescens</i>  | 14 | 0,00791 | 12  | 0,66193  |
| oslo          | <i>Xanthomonas campestris</i>   | 16 | 0,00506 | 1   | 9,59473  |
| oslo          | <i>Rothia mucilaginosa</i>      | 17 | 0,00494 | 98  | 0,01792  |
| oslo          | <i>Acinetobacter baumannii</i>  | 19 | 0,00416 | 29  | 0,18785  |
| oslo          | <i>Escherichia coli</i>         | 21 | 0,00301 | 87  | 0,02794  |
| oslo          | <i>Acinetobacter junii</i>      | 25 | 0,00137 | 181 | 0,00099  |
| oslo          | <i>Klebsiella pneumoniae</i>    | 26 | 0,00132 | 26  | 0,21277  |
| oslo          | <i>Enterococcus faecalis</i>    | 30 | 0,00049 | 58  | 0,07178  |
| oslo          | <i>Salmonella enterica</i>      | 31 | 0,00047 | 38  | 0,13381  |
| oslo          | <i>Listeria monocytogenes</i>   | 34 | 0,00019 | 285 | 0,00000  |
| oslo          | <i>Pseudomonas balearica</i>    | 36 | 0,00000 | 61  | 0,06847  |
| oslo          | <i>Cutibacterium granulosum</i> | 49 | 0,00000 | 17  | 0,33108  |
| oslo          | <i>Micrococcus luteus</i>       | 68 | 0,00000 | 5   | 2,88370  |

Table S4

|                |                          |    |          |     |          |
|----------------|--------------------------|----|----------|-----|----------|
| others         | Enterococcus faecalis    | 1  | 47,54807 | 1   | 13,60492 |
| others         | Pseudomonas aeruginosa   | 2  | 37,70298 | 2   | 10,33503 |
| others         | Listeria monocytogenes   | 5  | 12,24438 | 12  | 1,46657  |
| others         | Escherichia coli         | 6  | 9,92451  | 5   | 3,80827  |
| others         | Salmonella enterica      | 7  | 9,59761  | 8   | 2,15302  |
| others         | Pseudomonas stutzeri     | 10 | 0,77212  | 7   | 2,25665  |
| others         | Klebsiella pneumoniae    | 16 | 0,03380  | 27  | 0,39037  |
| others         | Pseudomonas fluorescens  | 19 | 0,01486  | 19  | 0,65709  |
| others         | Moraxella osloensis      | 23 | 0,00546  | 125 | 0,00223  |
| others         | Acinetobacter baumannii  | 26 | 0,00379  | 77  | 0,04023  |
| others         | Rothia mucilaginosa      | 30 | 0,00152  | 183 | 0,00026  |
| others         | Acinetobacter junii      | 31 | 0,00107  | 212 | 0,00006  |
| others         | Xanthomonas campestris   | 32 | 0,00075  | 6   | 3,75250  |
| others         | Pseudomonas balearica    | 53 | 0,00000  | 15  | 1,11758  |
| others         | Micrococcus luteus       | 66 | 0,00000  | 68  | 0,09694  |
| others         | Cutibacterium granulosum | 68 | 0,00000  | 42  | 0,18221  |
| porto          | Pseudomonas stutzeri     | 3  | 0,14555  | 11  | 1,27928  |
| porto          | Moraxella osloensis      | 7  | 0,03837  | 100 | 0,02732  |
| porto          | Acinetobacter baumannii  | 10 | 0,02167  | 50  | 0,33972  |
| porto          | Pseudomonas aeruginosa   | 12 | 0,01560  | 48  | 0,37929  |
| porto          | Escherichia coli         | 13 | 0,01161  | 15  | 0,89464  |
| porto          | Rothia mucilaginosa      | 16 | 0,00873  | 144 | 0,00462  |
| porto          | Klebsiella pneumoniae    | 18 | 0,00859  | 9   | 1,33434  |
| porto          | Pseudomonas fluorescens  | 19 | 0,00688  | 46  | 0,42636  |
| porto          | Salmonella enterica      | 22 | 0,00588  | 16  | 0,87115  |
| porto          | Acinetobacter junii      | 23 | 0,00502  | 147 | 0,00387  |
| porto          | Xanthomonas campestris   | 25 | 0,00389  | 7   | 1,43126  |
| porto          | Enterococcus faecalis    | 31 | 0,00114  | 41  | 0,49713  |
| porto          | Listeria monocytogenes   | 32 | 0,00033  | 225 | 0,00016  |
| porto          | Pseudomonas balearica    | 52 | 0,00000  | 43  | 0,48740  |
| porto          | Micrococcus luteus       | 66 | 0,00000  | 33  | 0,59122  |
| porto          | Cutibacterium granulosum | 68 | 0,00000  | 22  | 0,72659  |
| rio_de_janeirc | Pseudomonas stutzeri     | 1  | 0,85683  | 6   | 2,15705  |
| rio_de_janeirc | Moraxella osloensis      | 3  | 0,20560  | 13  | 1,30679  |



Table S4

|                |                          |    |         |     |         |
|----------------|--------------------------|----|---------|-----|---------|
| rio_de_janeirc | Acinetobacter baumannii  | 4  | 0,19590 | 2   | 5,36695 |
| rio_de_janeirc | Enterococcus faecalis    | 8  | 0,07935 | 46  | 0,27812 |
| rio_de_janeirc | Acinetobacter junii      | 9  | 0,06500 | 142 | 0,02266 |
| rio_de_janeirc | Escherichia coli         | 11 | 0,03538 | 21  | 0,96718 |
| rio_de_janeirc | Klebsiella pneumoniae    | 12 | 0,02927 | 24  | 0,69983 |
| rio_de_janeirc | Pseudomonas aeruginosa   | 14 | 0,02330 | 19  | 1,01889 |
| rio_de_janeirc | Salmonella enterica      | 16 | 0,01770 | 23  | 0,83304 |
| rio_de_janeirc | Rothia mucilaginosa      | 20 | 0,00790 | 146 | 0,02080 |
| rio_de_janeirc | Pseudomonas fluorescens  | 23 | 0,00416 | 7   | 1,99884 |
| rio_de_janeirc | Xanthomonas campestris   | 28 | 0,00289 | 25  | 0,64512 |
| rio_de_janeirc | Listeria monocytogenes   | 31 | 0,00241 | 185 | 0,00849 |
| rio_de_janeirc | Micrococcus luteus       | 65 | 0,00000 | 51  | 0,23786 |
| rio_de_janeirc | Cutibacterium granulosum | 70 | 0,00000 | 87  | 0,09190 |
| rio_de_janeirc | Pseudomonas balearica    | 71 | 0,00000 | 14  | 1,26208 |
| santiago       | Pseudomonas stutzeri     | 2  | 0,07849 | 7   | 1,20328 |
| santiago       | Pseudomonas aeruginosa   | 4  | 0,03697 | 25  | 0,56510 |
| santiago       | Escherichia coli         | 6  | 0,02416 | 67  | 0,16156 |
| santiago       | Klebsiella pneumoniae    | 7  | 0,02410 | 17  | 0,98032 |
| santiago       | Acinetobacter baumannii  | 9  | 0,01892 | 4   | 2,40785 |
| santiago       | Salmonella enterica      | 12 | 0,01198 | 9   | 1,11961 |
| santiago       | Moraxella osloensis      | 13 | 0,01173 | 38  | 0,44851 |
| santiago       | Pseudomonas fluorescens  | 14 | 0,01104 | 12  | 1,06388 |
| santiago       | Rothia mucilaginosa      | 18 | 0,00885 | 108 | 0,03026 |
| santiago       | Acinetobacter junii      | 21 | 0,00463 | 128 | 0,01808 |
| santiago       | Xanthomonas campestris   | 22 | 0,00388 | 5   | 2,30607 |
| santiago       | Enterococcus faecalis    | 26 | 0,00311 | 31  | 0,49190 |
| santiago       | Listeria monocytogenes   | 32 | 0,00183 | 172 | 0,00470 |
| santiago       | Cutibacterium granulosum | 60 | 0,00000 | 28  | 0,51852 |
| santiago       | Micrococcus luteus       | 64 | 0,00000 | 54  | 0,29706 |
| santiago       | Pseudomonas balearica    | 70 | 0,00000 | 34  | 0,45846 |
| sao paulo      | Enterococcus faecalis    | 3  | 0,49891 | 7   | 1,99944 |
| sao paulo      | Pseudomonas aeruginosa   | 6  | 0,34283 | 28  | 0,27696 |
| sao paulo      | Salmonella enterica      | 7  | 0,05843 | 20  | 0,44120 |
| sao paulo      | Escherichia coli         | 9  | 0,05109 | 33  | 0,24959 |

Table S4

|           |                                 |    |         |     |         |
|-----------|---------------------------------|----|---------|-----|---------|
| sao paulo | <i>Rothia mucilaginosa</i>      | 14 | 0,02592 | 62  | 0,08704 |
| sao paulo | <i>Acinetobacter junii</i>      | 16 | 0,01895 | 166 | 0,00077 |
| sao paulo | <i>Listeria monocytogenes</i>   | 17 | 0,01690 | 61  | 0,09475 |
| sao paulo | <i>Klebsiella pneumoniae</i>    | 22 | 0,00964 | 15  | 0,60954 |
| sao paulo | <i>Acinetobacter baumannii</i>  | 23 | 0,00923 | 56  | 0,11194 |
| sao paulo | <i>Moraxella osloensis</i>      | 24 | 0,00716 | 127 | 0,00243 |
| sao paulo | <i>Pseudomonas stutzeri</i>     | 26 | 0,00399 | 58  | 0,10314 |
| sao paulo | <i>Pseudomonas fluorescens</i>  | 27 | 0,00391 | 50  | 0,16710 |
| sao paulo | <i>Xanthomonas campestris</i>   | 29 | 0,00107 | 2   | 9,31724 |
| sao paulo | <i>Cutibacterium granulosum</i> | 53 | 0,00000 | 25  | 0,34213 |
| sao paulo | <i>Pseudomonas balearica</i>    | 63 | 0,00000 | 97  | 0,00986 |
| sao paulo | <i>Micrococcus luteus</i>       | 65 | 0,00000 | 54  | 0,15550 |
| seoul     | <i>Moraxella osloensis</i>      | 2  | 0,12567 | 61  | 0,02491 |
| seoul     | <i>Pseudomonas aeruginosa</i>   | 3  | 0,06907 | 54  | 0,06566 |
| seoul     | <i>Rothia mucilaginosa</i>      | 8  | 0,04211 | 64  | 0,01937 |
| seoul     | <i>Acinetobacter baumannii</i>  | 11 | 0,01479 | 47  | 0,20136 |
| seoul     | <i>Xanthomonas campestris</i>   | 12 | 0,01476 | 9   | 1,24019 |
| seoul     | <i>Klebsiella pneumoniae</i>    | 14 | 0,01280 | 4   | 2,12680 |
| seoul     | <i>Pseudomonas stutzeri</i>     | 15 | 0,01157 | 44  | 0,32522 |
| seoul     | <i>Escherichia coli</i>         | 17 | 0,00941 | 51  | 0,09765 |
| seoul     | <i>Pseudomonas fluorescens</i>  | 20 | 0,00771 | 52  | 0,07937 |
| seoul     | <i>Acinetobacter junii</i>      | 24 | 0,00432 | 186 | 0,00054 |
| seoul     | <i>Salmonella enterica</i>      | 27 | 0,00399 | 24  | 0,72010 |
| seoul     | <i>Listeria monocytogenes</i>   | 31 | 0,00273 | 156 | 0,00115 |
| seoul     | <i>Enterococcus faecalis</i>    | 32 | 0,00269 | 33  | 0,59031 |
| seoul     | <i>Cutibacterium granulosum</i> | 43 | 0,00000 | 13  | 0,83329 |
| seoul     | <i>Micrococcus luteus</i>       | 56 | 0,00000 | 21  | 0,74583 |
| seoul     | <i>Pseudomonas balearica</i>    | 69 | 0,00000 | 68  | 0,01666 |
| singapore | <i>Moraxella osloensis</i>      | 2  | 0,44844 | 52  | 0,11419 |
| singapore | <i>Escherichia coli</i>         | 3  | 0,31923 | 22  | 0,29344 |
| singapore | <i>Acinetobacter baumannii</i>  | 4  | 0,26913 | 7   | 1,19746 |
| singapore | <i>Rothia mucilaginosa</i>      | 7  | 0,09101 | 57  | 0,09391 |
| singapore | <i>Pseudomonas aeruginosa</i>   | 10 | 0,06437 | 33  | 0,19517 |
| singapore | <i>Klebsiella pneumoniae</i>    | 12 | 0,03731 | 12  | 0,54034 |

Table S4

|           |                                 |    |         |     |          |
|-----------|---------------------------------|----|---------|-----|----------|
| singapore | <i>Pseudomonas stutzeri</i>     | 13 | 0,03659 | 30  | 0,23050  |
| singapore | <i>Acinetobacter junii</i>      | 17 | 0,01535 | 139 | 0,00667  |
| singapore | <i>Xanthomonas campestris</i>   | 20 | 0,01152 | 3   | 5,14627  |
| singapore | <i>Pseudomonas fluorescens</i>  | 21 | 0,01000 | 14  | 0,47515  |
| singapore | <i>Enterococcus faecalis</i>    | 22 | 0,00824 | 44  | 0,14657  |
| singapore | <i>Salmonella enterica</i>      | 33 | 0,00070 | 8   | 0,84397  |
| singapore | <i>Listeria monocytogenes</i>   | 35 | 0,00033 | 292 | 0,00000  |
| singapore | <i>Pseudomonas balearica</i>    | 47 | 0,00000 | 61  | 0,09187  |
| singapore | <i>Cutibacterium granulosum</i> | 52 | 0,00000 | 36  | 0,18541  |
| singapore | <i>Micrococcus luteus</i>       | 69 | 0,00000 | 1   | 32,88693 |
| sofia     | <i>Moraxella osloensis</i>      | 2  | 0,36995 | 22  | 0,44925  |
| sofia     | <i>Pseudomonas fluorescens</i>  | 5  | 0,12091 | 8   | 1,98887  |
| sofia     | <i>Xanthomonas campestris</i>   | 8  | 0,05462 | 13  | 0,88798  |
| sofia     | <i>Pseudomonas stutzeri</i>     | 10 | 0,04762 | 16  | 0,70331  |
| sofia     | <i>Pseudomonas aeruginosa</i>   | 12 | 0,03040 | 19  | 0,55493  |
| sofia     | <i>Rothia mucilaginosa</i>      | 13 | 0,03008 | 74  | 0,07430  |
| sofia     | <i>Acinetobacter junii</i>      | 15 | 0,02083 | 131 | 0,02252  |
| sofia     | <i>Acinetobacter baumannii</i>  | 16 | 0,02050 | 7   | 2,20440  |
| sofia     | <i>Escherichia coli</i>         | 22 | 0,01039 | 50  | 0,15112  |
| sofia     | <i>Klebsiella pneumoniae</i>    | 28 | 0,00429 | 3   | 5,52393  |
| sofia     | <i>Salmonella enterica</i>      | 30 | 0,00367 | 20  | 0,50140  |
| sofia     | <i>Enterococcus faecalis</i>    | 34 | 0,00077 | 71  | 0,07995  |
| sofia     | <i>Listeria monocytogenes</i>   | 35 | 0,00023 | 225 | 0,00044  |
| sofia     | <i>Pseudomonas balearica</i>    | 41 | 0,00000 | 29  | 0,32596  |
| sofia     | <i>Cutibacterium granulosum</i> | 53 | 0,00000 | 45  | 0,17351  |
| sofia     | <i>Micrococcus luteus</i>       | 71 | 0,00000 | 4   | 3,62901  |
| taipei    | <i>Moraxella osloensis</i>      | 2  | 0,22785 | 46  | 0,09103  |
| taipei    | <i>Acinetobacter junii</i>      | 4  | 0,05343 | 102 | 0,00769  |
| taipei    | <i>Pseudomonas aeruginosa</i>   | 5  | 0,04199 | 30  | 0,14234  |
| taipei    | <i>Xanthomonas campestris</i>   | 7  | 0,02972 | 4   | 4,74514  |
| taipei    | <i>Pseudomonas stutzeri</i>     | 9  | 0,02641 | 19  | 0,22837  |
| taipei    | <i>Acinetobacter baumannii</i>  | 16 | 0,00644 | 26  | 0,17134  |
| taipei    | <i>Pseudomonas fluorescens</i>  | 18 | 0,00349 | 11  | 0,36919  |
| taipei    | <i>Escherichia coli</i>         | 19 | 0,00220 | 78  | 0,02475  |

Table S4

|        |                                 |    |         |     |         |
|--------|---------------------------------|----|---------|-----|---------|
| taipei | <i>Rothia mucilaginosa</i>      | 20 | 0,00218 | 126 | 0,00333 |
| taipei | <i>Klebsiella pneumoniae</i>    | 21 | 0,00201 | 3   | 5,91000 |
| taipei | <i>Salmonella enterica</i>      | 31 | 0,00035 | 21  | 0,21333 |
| taipei | <i>Enterococcus faecalis</i>    | 32 | 0,00008 | 43  | 0,09930 |
| taipei | <i>Listeria monocytogenes</i>   | 34 | 0,00003 | 209 | 0,00008 |
| taipei | <i>Pseudomonas balearica</i>    | 45 | 0,00000 | 51  | 0,08090 |
| taipei | <i>Cutibacterium granulorum</i> | 51 | 0,00000 | 37  | 0,12377 |
| taipei | <i>Micrococcus luteus</i>       | 68 | 0,00000 | 27  | 0,16229 |
| tokyo  | <i>Moraxella osloensis</i>      | 4  | 0,21466 | 27  | 0,54145 |
| tokyo  | <i>Pseudomonas fluorescens</i>  | 5  | 0,10028 | 11  | 1,23242 |
| tokyo  | <i>Acinetobacter baumannii</i>  | 8  | 0,06761 | 3   | 4,00990 |
| tokyo  | <i>Pseudomonas stutzeri</i>     | 9  | 0,06002 | 13  | 1,17399 |
| tokyo  | <i>Xanthomonas campestris</i>   | 10 | 0,05559 | 12  | 1,18356 |
| tokyo  | <i>Pseudomonas aeruginosa</i>   | 13 | 0,02354 | 9   | 1,46390 |
| tokyo  | <i>Klebsiella pneumoniae</i>    | 14 | 0,02233 | 28  | 0,53080 |
| tokyo  | <i>Escherichia coli</i>         | 15 | 0,02135 | 37  | 0,41667 |
| tokyo  | <i>Acinetobacter junii</i>      | 18 | 0,01495 | 125 | 0,02945 |
| tokyo  | <i>Salmonella enterica</i>      | 20 | 0,00981 | 24  | 0,60081 |
| tokyo  | <i>Rothia mucilaginosa</i>      | 22 | 0,00799 | 124 | 0,03019 |
| tokyo  | <i>Enterococcus faecalis</i>    | 31 | 0,00342 | 56  | 0,22543 |
| tokyo  | <i>Listeria monocytogenes</i>   | 33 | 0,00175 | 196 | 0,00502 |
| tokyo  | <i>Pseudomonas balearica</i>    | 45 | 0,00000 | 33  | 0,45772 |
| tokyo  | <i>Cutibacterium granulorum</i> | 55 | 0,00000 | 52  | 0,24005 |
| tokyo  | <i>Micrococcus luteus</i>       | 70 | 0,00000 | 19  | 0,78457 |
| vienna | <i>Moraxella osloensis</i>      | 2  | 0,25280 | 53  | 0,09127 |
| vienna | <i>Pseudomonas aeruginosa</i>   | 5  | 0,08412 | 2   | 7,68060 |
| vienna | <i>Pseudomonas fluorescens</i>  | 6  | 0,05431 | 8   | 1,28066 |
| vienna | <i>Pseudomonas stutzeri</i>     | 7  | 0,05053 | 10  | 1,02288 |
| vienna | <i>Xanthomonas campestris</i>   | 10 | 0,02752 | 11  | 1,00213 |
| vienna | <i>Acinetobacter baumannii</i>  | 13 | 0,01639 | 12  | 1,00032 |
| vienna | <i>Acinetobacter junii</i>      | 14 | 0,01199 | 82  | 0,04164 |
| vienna | <i>Rothia mucilaginosa</i>      | 19 | 0,00482 | 128 | 0,01392 |
| vienna | <i>Escherichia coli</i>         | 20 | 0,00460 | 50  | 0,09660 |
| vienna | <i>Klebsiella pneumoniae</i>    | 22 | 0,00375 | 29  | 0,22635 |

Table S4

|        |                                 |    |         |     |          |
|--------|---------------------------------|----|---------|-----|----------|
| vienna | <i>Salmonella enterica</i>      | 24 | 0,00261 | 28  | 0,23963  |
| vienna | <i>Listeria monocytogenes</i>   | 33 | 0,00023 | 263 | 0,00000  |
| vienna | <i>Enterococcus faecalis</i>    | 34 | 0,00023 | 91  | 0,03385  |
| vienna | <i>Pseudomonas balearica</i>    | 45 | 0,00000 | 18  | 0,47791  |
| vienna | <i>Cutibacterium granulosum</i> | 53 | 0,00000 | 38  | 0,14770  |
| vienna | <i>Micrococcus luteus</i>       | 69 | 0,00000 | 9   | 1,11670  |
| zurich | <i>Pseudomonas aeruginosa</i>   | 7  | 0,02790 | 13  | 0,63036  |
| zurich | <i>Pseudomonas stutzeri</i>     | 9  | 0,00703 | 10  | 0,72835  |
| zurich | <i>Rothia mucilaginosa</i>      | 13 | 0,00544 | 109 | 0,01263  |
| zurich | <i>Xanthomonas campestris</i>   | 14 | 0,00388 | 1   | 10,02636 |
| zurich | <i>Salmonella enterica</i>      | 15 | 0,00385 | 32  | 0,17543  |
| zurich | <i>Escherichia coli</i>         | 16 | 0,00265 | 44  | 0,08088  |
| zurich | <i>Pseudomonas fluorescens</i>  | 18 | 0,00244 | 4   | 3,01900  |
| zurich | <i>Klebsiella pneumoniae</i>    | 19 | 0,00153 | 37  | 0,13373  |
| zurich | <i>Acinetobacter baumannii</i>  | 21 | 0,00093 | 36  | 0,13757  |
| zurich | <i>Moraxella osloensis</i>      | 22 | 0,00049 | 115 | 0,01020  |
| zurich | <i>Listeria monocytogenes</i>   | 23 | 0,00026 | 263 | 0,00000  |
| zurich | <i>Enterococcus faecalis</i>    | 27 | 0,00015 | 98  | 0,01530  |
| zurich | <i>Acinetobacter junii</i>      | 29 | 0,00009 | 243 | 0,00000  |
| zurich | <i>Pseudomonas balearica</i>    | 48 | 0,00000 | 25  | 0,23320  |
| zurich | <i>Cutibacterium granulosum</i> | 56 | 0,00000 | 51  | 0,06798  |
| zurich | <i>Micrococcus luteus</i>       | 70 | 0,00000 | 30  | 0,17632  |

Table S5

**Supplementary Table S5. Rank of PPG hosts predicted by both vHULK and CRISPR.** Only PPGs with the same prediction in both approaches appear in this table.

| City      | Bacteria/ PPG Host             | Bacteria abundance rank | Bacteria abundance (%) | PPGs abundance rank | PPGs abundance (%) |
|-----------|--------------------------------|-------------------------|------------------------|---------------------|--------------------|
| auckland  | <i>Pseudomonas aeruginosa</i>  | 3                       | 0,08573                | 2                   | 0,96212            |
| auckland  | <i>Acinetobacter baumannii</i> | 10                      | 0,01772                | 7                   | 0,14387            |
| auckland  | <i>Klebsiella pneumoniae</i>   | 11                      | 0,01650                | 16                  | 0,06934            |
| auckland  | <i>Listeria monocytogenes</i>  | 22                      | 0,00102                | 31                  | 0,00000            |
| berlin    | <i>Pseudomonas aeruginosa</i>  | 6                       | 0,09053                | 3                   | 1,79556            |
| berlin    | <i>Acinetobacter baumannii</i> | 10                      | 0,03613                | 6                   | 0,57434            |
| berlin    | <i>Klebsiella pneumoniae</i>   | 17                      | 0,01301                | 17                  | 0,03999            |
| berlin    | <i>Listeria monocytogenes</i>  | 30                      | 0,00210                | 34                  | 0,00125            |
| bogota    | <i>Acinetobacter baumannii</i> | 7                       | 0,03153                | 3                   | 1,38348            |
| bogota    | <i>Pseudomonas aeruginosa</i>  | 9                       | 0,02862                | 5                   | 0,67338            |
| bogota    | <i>Klebsiella pneumoniae</i>   | 10                      | 0,02302                | 14                  | 0,09483            |
| bogota    | <i>Listeria monocytogenes</i>  | 33                      | 0,00128                | 32                  | 0,00240            |
| cairngorm | <i>Pseudomonas aeruginosa</i>  | 2                       | 0,22953                | 4                   | 0,69385            |
| cairngorm | <i>Listeria monocytogenes</i>  | 4                       | 0,16912                | 12                  | 0,16780            |
| cairngorm | <i>Acinetobacter baumannii</i> | 18                      | 0,00387                | 17                  | 0,04704            |
| cairngorm | <i>Klebsiella pneumoniae</i>   | 33                      | 0,00054                | 18                  | 0,00688            |
| denver    | <i>Klebsiella pneumoniae</i>   | 7                       | 0,02088                | 11                  | 0,04480            |
| denver    | <i>Pseudomonas aeruginosa</i>  | 8                       | 0,01474                | 8                   | 0,13303            |
| denver    | <i>Acinetobacter baumannii</i> | 11                      | 0,00956                | 9                   | 0,11382            |
| denver    | <i>Listeria monocytogenes</i>  | 34                      | 0,00057                | 29                  | 0,00000            |
| doha      | <i>Pseudomonas aeruginosa</i>  | 2                       | 3,99929                | 1                   | 4,57110            |
| doha      | <i>Listeria monocytogenes</i>  | 14                      | 0,02491                | 16                  | 0,01216            |
| doha      | <i>Acinetobacter baumannii</i> | 15                      | 0,02114                | 13                  | 0,06673            |
| doha      | <i>Klebsiella pneumoniae</i>   | 19                      | 0,00830                | 15                  | 0,04587            |
| fairbanks | <i>Klebsiella pneumoniae</i>   | 10                      | 0,04040                | 15                  | 0,06206            |
| fairbanks | <i>Pseudomonas aeruginosa</i>  | 16                      | 0,01154                | 9                   | 0,22009            |
| fairbanks | <i>Acinetobacter baumannii</i> | 18                      | 0,00979                | 6                   | 0,29207            |
| fairbanks | <i>Listeria monocytogenes</i>  | 32                      | 0,00072                | 36                  | 0,00002            |
| hamilton  | <i>Pseudomonas aeruginosa</i>  | 4                       | 0,08008                | 1                   | 0,68051            |

Table S5

|              |                         |    |          |    |          |
|--------------|-------------------------|----|----------|----|----------|
| hamilton     | Acinetobacter baumannii | 5  | 0,06056  | 9  | 0,07794  |
| hamilton     | Klebsiella pneumoniae   | 11 | 0,03372  | 7  | 0,15391  |
| hamilton     | Listeria monocytogenes  | 22 | 0,00064  | 38 | 0,00000  |
| hanoi        | Acinetobacter baumannii | 5  | 0,06655  | 5  | 0,39403  |
| hanoi        | Klebsiella pneumoniae   | 8  | 0,03840  | 7  | 0,15230  |
| hanoi        | Pseudomonas aeruginosa  | 10 | 0,01564  | 8  | 0,12179  |
| hanoi        | Listeria monocytogenes  | 32 | 0,00084  | 34 | 0,00000  |
| hong_kong    | Pseudomonas aeruginosa  | 4  | 0,07228  | 6  | 0,30082  |
| hong_kong    | Acinetobacter baumannii | 8  | 0,02743  | 12 | 0,09828  |
| hong_kong    | Klebsiella pneumoniae   | 24 | 0,00467  | 14 | 0,02036  |
| hong_kong    | Listeria monocytogenes  | 34 | 0,00009  | 34 | 0,00006  |
| ilorin       | Klebsiella pneumoniae   | 3  | 0,20051  | 3  | 0,58563  |
| ilorin       | Pseudomonas aeruginosa  | 5  | 0,09112  | 1  | 4,89105  |
| ilorin       | Acinetobacter baumannii | 7  | 0,06359  | 8  | 0,19310  |
| ilorin       | Listeria monocytogenes  | 18 | 0,00288  | 34 | 0,00030  |
| kuala_lumpur | Pseudomonas aeruginosa  | 1  | 43,17741 | 1  | 38,35489 |
| kuala_lumpur | Listeria monocytogenes  | 5  | 0,94545  | 3  | 0,38271  |
| kuala_lumpur | Klebsiella pneumoniae   | 15 | 0,00076  | 6  | 0,12375  |
| kuala_lumpur | Acinetobacter baumannii | 30 | 0,00003  | 21 | 0,00009  |
| kyiv         | Klebsiella pneumoniae   | 2  | 1,24649  | 1  | 1,25038  |
| kyiv         | Acinetobacter baumannii | 4  | 0,29822  | 10 | 0,26061  |
| kyiv         | Pseudomonas aeruginosa  | 7  | 0,06321  | 14 | 0,21806  |
| kyiv         | Listeria monocytogenes  | 30 | 0,00137  | 31 | 0,00001  |
| lisbon       | Acinetobacter baumannii | 3  | 0,77363  | 3  | 1,70853  |
| lisbon       | Pseudomonas aeruginosa  | 6  | 0,10960  | 2  | 2,05801  |
| lisbon       | Klebsiella pneumoniae   | 9  | 0,02830  | 4  | 0,55244  |
| lisbon       | Listeria monocytogenes  | 22 | 0,00172  | 35 | 0,00000  |
| london       | Pseudomonas aeruginosa  | 1  | 5,04627  | 2  | 1,28101  |
| london       | Listeria monocytogenes  | 2  | 4,10031  | 10 | 0,24606  |
| london       | Acinetobacter baumannii | 24 | 0,00409  | 16 | 0,16042  |
| london       | Klebsiella pneumoniae   | 32 | 0,00156  | 24 | 0,02350  |
| marseille    | Pseudomonas aeruginosa  | 6  | 0,05407  | 2  | 0,24244  |
| marseille    | Acinetobacter baumannii | 9  | 0,03945  | 3  | 0,23120  |
| marseille    | Klebsiella pneumoniae   | 18 | 0,01504  | 9  | 0,05204  |

Table S5

|                |                         |    |          |    |          |
|----------------|-------------------------|----|----------|----|----------|
| marseille      | Listeria monocytogene:  | 34 | 0,00074  | 33 | 0,00034  |
| minneapolis    | Pseudomonas aeruginosa  | 12 | 0,01170  | 5  | 0,11098  |
| minneapolis    | Listeria monocytogene:  | 26 | 0,00144  | 28 | 0,00025  |
| minneapolis    | Klebsiella pneumoniae   | 28 | 0,00079  | 14 | 0,00774  |
| minneapolis    | Acinetobacter baumannii | 30 | 0,00030  | 19 | 0,00342  |
| naples         | Pseudomonas aeruginosa  | 9  | 0,02645  | 6  | 0,24586  |
| naples         | Acinetobacter baumannii | 16 | 0,01183  | 5  | 0,53742  |
| naples         | Klebsiella pneumoniae   | 29 | 0,00173  | 14 | 0,01429  |
| naples         | Listeria monocytogene:  | 35 | 0,00016  | 30 | 0,00000  |
| new_york_city  | Acinetobacter baumannii | 6  | 0,23944  | 7  | 0,58176  |
| new_york_city  | Pseudomonas aeruginosa  | 12 | 0,11191  | 2  | 1,32995  |
| new_york_city  | Listeria monocytogene:  | 19 | 0,02107  | 24 | 0,02067  |
| new_york_city  | Klebsiella pneumoniae   | 20 | 0,01869  | 13 | 0,18260  |
| offa           | Klebsiella pneumoniae   | 2  | 1,02931  | 3  | 0,98044  |
| offa           | Pseudomonas aeruginosa  | 5  | 0,08176  | 1  | 3,51296  |
| offa           | Acinetobacter baumannii | 7  | 0,03776  | 9  | 0,13290  |
| offa           | Listeria monocytogene:  | 17 | 0,00224  | 33 | 0,00002  |
| oslo           | Pseudomonas aeruginosa  | 12 | 0,00931  | 8  | 0,15437  |
| oslo           | Acinetobacter baumannii | 19 | 0,00416  | 10 | 0,06730  |
| oslo           | Klebsiella pneumoniae   | 26 | 0,00132  | 18 | 0,01013  |
| oslo           | Listeria monocytogene:  | 34 | 0,00019  | 36 | 0,00000  |
| others         | Pseudomonas aeruginosa  | 2  | 37,70298 | 1  | 11,53677 |
| others         | Listeria monocytogene:  | 5  | 12,24438 | 5  | 0,70122  |
| others         | Klebsiella pneumoniae   | 16 | 0,03380  | 14 | 0,03262  |
| others         | Acinetobacter baumannii | 26 | 0,00379  | 16 | 0,00879  |
| porto          | Acinetobacter baumannii | 10 | 0,02167  | 12 | 0,18334  |
| porto          | Pseudomonas aeruginosa  | 12 | 0,01560  | 4  | 0,67798  |
| porto          | Klebsiella pneumoniae   | 18 | 0,00859  | 16 | 0,01866  |
| porto          | Listeria monocytogene:  | 32 | 0,00033  | 32 | 0,00000  |
| rio_de_janeirc | Acinetobacter baumannii | 4  | 0,19590  | 1  | 1,84482  |
| rio_de_janeirc | Klebsiella pneumoniae   | 12 | 0,02927  | 11 | 0,09067  |
| rio_de_janeirc | Pseudomonas aeruginosa  | 14 | 0,02330  | 5  | 0,66934  |
| rio_de_janeirc | Listeria monocytogene:  | 31 | 0,00241  | 36 | 0,00068  |
| santiago       | Pseudomonas aeruginosa  | 4  | 0,03697  | 6  | 0,57349  |



Table S5

|           |                         |    |         |    |         |
|-----------|-------------------------|----|---------|----|---------|
| santiago  | Klebsiella pneumoniae   | 7  | 0,02410 | 15 | 0,04902 |
| santiago  | Acinetobacter baumannii | 9  | 0,01892 | 2  | 1,46137 |
| santiago  | Listeria monocytogenes  | 32 | 0,00183 | 30 | 0,00238 |
| sao paulo | Pseudomonas aeruginosa  | 6  | 0,34283 | 4  | 0,40723 |
| sao paulo | Listeria monocytogenes  | 17 | 0,01690 | 17 | 0,00558 |
| sao paulo | Klebsiella pneumoniae   | 22 | 0,00964 | 15 | 0,01702 |
| sao paulo | Acinetobacter baumannii | 23 | 0,00923 | 13 | 0,03691 |
| seoul     | Pseudomonas aeruginosa  | 3  | 0,06907 | 10 | 0,34839 |
| seoul     | Acinetobacter baumannii | 11 | 0,01479 | 12 | 0,02562 |
| seoul     | Klebsiella pneumoniae   | 14 | 0,01280 | 14 | 0,00725 |
| seoul     | Listeria monocytogenes  | 31 | 0,00273 | 22 | 0,00115 |
| singapore | Acinetobacter baumannii | 4  | 0,26913 | 3  | 0,37242 |
| singapore | Pseudomonas aeruginosa  | 10 | 0,06437 | 6  | 0,21671 |
| singapore | Klebsiella pneumoniae   | 12 | 0,03731 | 7  | 0,15272 |
| singapore | Listeria monocytogenes  | 35 | 0,00033 | 34 | 0,00000 |
| sofia     | Pseudomonas aeruginosa  | 12 | 0,03040 | 4  | 0,54884 |
| sofia     | Acinetobacter baumannii | 16 | 0,02050 | 3  | 1,08383 |
| sofia     | Klebsiella pneumoniae   | 28 | 0,00429 | 11 | 0,06800 |
| sofia     | Listeria monocytogenes  | 35 | 0,00023 | 33 | 0,00044 |
| taipei    | Pseudomonas aeruginosa  | 5  | 0,04199 | 7  | 0,13700 |
| taipei    | Acinetobacter baumannii | 16 | 0,00644 | 14 | 0,03088 |
| taipei    | Klebsiella pneumoniae   | 21 | 0,00201 | 17 | 0,00611 |
| taipei    | Listeria monocytogenes  | 34 | 0,00003 | 27 | 0,00008 |
| tokyo     | Acinetobacter baumannii | 8  | 0,06761 | 3  | 1,71600 |
| tokyo     | Pseudomonas aeruginosa  | 13 | 0,02354 | 4  | 0,69752 |
| tokyo     | Klebsiella pneumoniae   | 14 | 0,02233 | 18 | 0,06942 |
| tokyo     | Listeria monocytogenes  | 33 | 0,00175 | 32 | 0,00155 |
| vienna    | Pseudomonas aeruginosa  | 5  | 0,08412 | 1  | 0,83098 |
| vienna    | Acinetobacter baumannii | 13 | 0,01639 | 2  | 0,50323 |
| vienna    | Klebsiella pneumoniae   | 22 | 0,00375 | 16 | 0,02222 |
| vienna    | Listeria monocytogenes  | 33 | 0,00023 | 34 | 0,00000 |
| zurich    | Pseudomonas aeruginosa  | 7  | 0,02790 | 1  | 0,93058 |
| zurich    | Klebsiella pneumoniae   | 19 | 0,00153 | 13 | 0,01379 |
| zurich    | Acinetobacter baumannii | 21 | 0,00093 | 4  | 0,07697 |

Table S5

---

|        |                        |    |         |    |         |
|--------|------------------------|----|---------|----|---------|
| zurich | Listeria monocytogene: | 23 | 0,00026 | 35 | 0,00000 |
|--------|------------------------|----|---------|----|---------|

---

Table S6

**Supplementary Table S6. Hosts present in the list of 75 most common bacteria of Danko et. al (2021).**

| <b>Hosts in Danko et. al. (2021) list</b> | <b># of PPGs assigned</b> |
|-------------------------------------------|---------------------------|
| <i>Salmonella enterica</i>                | 32                        |
| <i>Pseudomonas aeruginosa</i>             | 31                        |
| <i>Klebsiella pneumoniae</i>              | 30                        |
| <i>Pseudomonas stutzeri</i>               | 25                        |
| <i>Acinetobacter baumannii</i>            | 18                        |
| <i>Pseudomonas balearica</i>              | 18                        |
| <i>Xanthomonas campestris</i>             | 13                        |
| <i>Escherichia coli</i>                   | 10                        |
| <i>Enterococcus faecalis</i>              | 9                         |
| <i>Staphylococcus epidermidis</i>         | 8                         |
| <i>Staphylococcus aureus</i>              | 7                         |
| <i>Pseudomonas fluorescens</i>            | 6                         |
| <i>Micrococcus luteus</i>                 | 6                         |
| <i>Moraxella osloensis</i>                | 5                         |
| <i>Listeria monocytogenes</i>             | 3                         |
| <i>Cutibacterium granulosum</i>           | 2                         |
| <i>Acinetobacter junii</i>                | 2                         |
| <i>Stenotrophomonas maltophilia</i>       | 1                         |
| <i>Rothia mucilaginosa</i>                | 1                         |
| <i>Roseomonas sp.</i>                     | 1                         |

Table S7

**Supplementary Table S7. CRISPR-Cas system found in PPGs.** Only predictions with CRISPR spacers evidence level above 3 were considered. The completeness, putative host (vHULK and CRISPR species) and lifestyle were shown.

| PPG     | CRISPR array(s) [coordinates] | Evidence Level | Cas Types/Subtypes [coordinates] | PPG Size (bp) | CheckV Quality | CRISPR Species prediction               | vHULK Species prediction     | CheckV Lifestyle             | Bacphlip Lifestyle           | Vibrant Lifestyle            |
|---------|-------------------------------|----------------|----------------------------------|---------------|----------------|-----------------------------------------|------------------------------|------------------------------|------------------------------|------------------------------|
| MSP0016 | MSP0016_1 [97520;100773]      | 2              |                                  | 250778        | Complete       |                                         |                              | virulent/lytic               | prophage/temperate/lysogenic | prophage/temperate/lysogenic |
| MSP0034 | MSP0034_1 [6741;7097]         | 3              | CAS-TypeIB [7235;14811]          | 212281        | High-quality   | <i>Clostridium botulinum</i>            |                              | virulent/lytic               | prophage/temperate/lysogenic |                              |
| MSP0217 | MSP0217_1 [54461;55156]       | 4              | CAS-TypeIIA [48222;54440]        | 110983        | Medium-quality |                                         |                              | prophage/temperate/lysogenic | prophage/temperate/lysogenic | prophage/temperate/lysogenic |
| MSP0656 | MSP0656_1 [43012;43301]       | 2              |                                  | 66247         | Medium-quality | <i>Bacillus halodurans</i>              | <i>Staphylococcus aureus</i> | prophage/temperate/lysogenic | prophage/temperate/lysogenic | prophage/temperate/lysogenic |
| MSP0734 | MSP0734_1 [134;461]           | 4              |                                  | 62834         | High-quality   | <i>Moraxella osloensis</i>              |                              | prophage/temperate/lysogenic | prophage/temperate/lysogenic | prophage/temperate/lysogenic |
| MSP1038 | MSP1038_1 [31669;34626]       | 4              | CAS-TypeIE [34691;39020]         | 52976         | Medium-quality | <i>Paracoccus yeei</i>                  |                              | prophage/temperate/lysogenic | prophage/temperate/lysogenic | prophage/temperate/lysogenic |
| MSP1127 | MSP1127_1 [6679;6888]         | 2              |                                  | 50550         | Low-quality    | <i>Propionibacterium freudenreichii</i> |                              | prophage/temperate/lysogenic | prophage/temperate/lysogenic | prophage/temperate/lysogenic |
| MSP1562 | MSP1562_1 [23846;31485]       | 4              | CAS-TypeIC [37143;37120]         | 43836         | Not-determined |                                         |                              | virulent/lytic               | prophage/temperate/lysogenic |                              |
| MSP1816 | MSP1816_1 [702;4572]          | 4              | CAS-TypeIF [10;537]              | 41124         | Medium-quality | <i>Moraxella osloensis</i>              |                              | prophage/temperate/lysogenic | prophage/temperate/lysogenic | prophage/temperate/lysogenic |

Table S8

**Supplementary Table S8. Most abundant PPG per sequenced sample.**

| <b>Samples</b>     | <b>PPG</b> | <b>Abundance (%)</b> | <b>City</b>   |
|--------------------|------------|----------------------|---------------|
| HMCMJCCXY_SL335787 | MSP0350    | 98,03                | Fairbanks     |
| HMCMJCCXY_SL335821 | MSP1223    | 89,33                | Fairbanks     |
| HMC2KCCXY_SL336697 | MSP0887    | 87,37                | Hong Kong     |
| HMGW3CCXY_SL342609 | MSP1584    | 85,31                | Tokyo         |
| HMC2KCCXY_SL336764 | MSP0887    | 83,81                | Hong Kong     |
| H75CGCCXY_SL263638 | MSP0030    | 82,74                | Auckland      |
| HMCMJCCXY_SL335834 | MSP1494    | 78,63                | Fairbanks     |
| HNHKFCCXY_SL345575 | MSP1878    | 77,45                | Hong Kong     |
| HMC2KCCXY_SL336755 | MSP0887    | 73,94                | Hong Kong     |
| HNHKFCCXY_SL346098 | MSP1228    | 71,50                | Hong Kong     |
| HMC2KCCXY_SL336804 | MSP0212    | 69,79                | Hong Kong     |
| HMC2KCCXY_SL336626 | MSP1840    | 69,65                | Hong Kong     |
| HMGW3CCXY_SL342349 | MSP0896    | 69,04                | Marseille     |
| HCY5JCCXY_SL269589 | MSP0322    | 67,74                | New York City |
| HMGN5CCXY_SL344637 | MSP1782    | 67,34                | Ilorin        |
| HMC2KCCXY_SL336564 | MSP0887    | 67,17                | Hong Kong     |
| HMCMJCCXY_SL335857 | MSP1010    | 65,79                | Fairbanks     |
| HCV72CCXY_SL269738 | MSP0197    | 65,19                | New York City |
| HMGN5CCXY_SL344676 | MSP0070    | 65,14                | Ilorin        |
| H3MGVCCXY_SL259989 | MSP0186    | 62,53                | --            |
| HCY5HCCXY_SL270918 | MSP0043    | 62,48                | London        |
| HCCGHCCXY_SL270433 | MSP0303    | 62,42                | London        |
| HT5YVCCXY_SL357341 | MSP1428    | 61,49                | Taipei        |
| HMCMJCCXY_SL335774 | MSP0817    | 61,33                | Fairbanks     |
| HNHKFCCXY_SL346119 | MSP1612    | 59,02                | Hong Kong     |
| HMCMJCCXY_SL335935 | MSP0825    | 57,64                | Lisbon        |
| HMCMJCCXY_SL335869 | MSP1122    | 57,54                | Doha          |

Table S8

|                     |         |       |               |
|---------------------|---------|-------|---------------|
| HMG TJCCXY_SL342628 | MSP1207 | 57,29 | Zurich        |
| HT5YVCCXY_SL357315  | MSP1109 | 56,14 | Taipei        |
| HMC2KCCXY_SL336773  | MSP0887 | 55,47 | Hong Kong     |
| H3KHWCCXY_SL263333  | MSP0694 | 53,69 | Porto         |
| H75CGCCXY_SL263662  | MSP1220 | 52,54 | Auckland      |
| HCY5JCCXY_SL269547  | MSP1857 | 50,84 | New York City |
| HMC2KCCXY_SL336743  | MSP0887 | 50,13 | Hong Kong     |
| HCY5HCCXY_SL270926  | MSP1857 | 47,74 | London        |
| HMGW3CCXY_SL342282  | MSP1647 | 46,39 | Vienna        |
| HNHKFCCXY_SL345981  | MSP1612 | 45,97 | Hong Kong     |
| HCV72CCXY_SL269800  | MSP1193 | 44,03 | New York City |
| HCCGHCCXY_SL270547  | MSP1621 | 43,32 | London        |
| HMC2KCCXY_SL336783  | MSP0887 | 42,36 | Hong Kong     |
| H2NYMCCXY_SL254828  | MSP0965 | 40,96 | Fairbanks     |
| HCV72CCXY_SL269768  | MSP0972 | 40,95 | New York City |
| HNHKFCCXY_SL345455  | MSP1354 | 39,80 | Hong Kong     |
| H7HJMCCXY_SL272809  | MSP1193 | 39,30 | Lisbon        |
| HCCGHCCXY_SL270289  | MSP1670 | 39,21 | London        |
| H3MGVCCXY_SL259917  | MSP1182 | 38,57 | New York City |
| HMG N5CCXY_SL344653 | MSP0317 | 38,46 | Ilorin        |
| HKC32ALXX_SL254693  | MSP0038 | 37,75 | Ilorin        |
| HCV72CCXY_SL269721  | MSP1175 | 37,53 | New York City |
| HMGW3CCXY_SL342350  | MSP0320 | 36,42 | Marseille     |
| HCY5JCCXY_SL269554  | MSP1611 | 35,72 | New York City |
| HMC MJCCXY_SL335859 | MSP1802 | 35,25 | Fairbanks     |
| HMGW3CCXY_SL342470  | MSP1876 | 34,27 | Minneapolis   |
| HMC MJCCXY_SL336349 | MSP0590 | 34,18 | Taipei        |
| HMC2KCCXY_SL336828  | MSP1876 | 34,01 | Hong Kong     |
| HMC2KCCXY_SL336681  | MSP1612 | 33,94 | Hong Kong     |
| HNGH3CCXY_SL344537  | MSP1302 | 33,94 | Ilorin        |

Table S8

|                    |         |       |                |
|--------------------|---------|-------|----------------|
| HMC2KCCXY_SL336679 | MSP1612 | 33,81 | Hong Kong      |
| HCV72CCXY_SL269788 | MSP0669 | 33,52 | New York City  |
| HCV72CCXY_SL269782 | MSP1193 | 33,45 | New York City  |
| HMGMHCCXY_SL343354 | MSP1228 | 33,35 | Singapore      |
| H2NYMCCXY_SL254815 | MSP0133 | 33,10 | Rio De Janeiro |
| HT5YVCCXY_SL357286 | MSP0936 | 33,04 | Taipei         |
| HMCMJCCXY_SL335963 | MSP1708 | 33,03 | Lisbon         |
| H2NYMCCXY_SL254824 | MSP1729 | 32,95 | Rio De Janeiro |
| H75CGCCXY_SL263639 | MSP0600 | 32,44 | Hamilton       |
| HMCMJCCXY_SL335942 | MSP1193 | 32,09 | Lisbon         |
| HCVMTCCXY_SL269554 | MSP1611 | 31,74 | New York City  |
| HCCGHCCXY_SL270294 | MSP0244 | 31,55 | London         |
| HCY5JCCXY_SL269595 | MSP0676 | 31,36 | New York City  |
| HNGH3CCXY_SL344549 | MSP0777 | 31,27 | Ilorin         |
| HMGW3CCXY_SL342530 | MSP1876 | 31,24 | Hong Kong      |
| HMGW3CCXY_SL342278 | MSP0821 | 30,96 | Vienna         |
| HNHKFCCXY_SL346109 | MSP1612 | 30,67 | Hong Kong      |
| H7HJMCCXY_SL272782 | MSP1512 | 30,58 | Ilorin         |
| H7KYMCCXY_SL273103 | MSP0975 | 30,29 | Fairbanks      |
| HMC2KCCXY_SL336578 | MSP1612 | 30,28 | Hong Kong      |
| HMCMJCCXY_SL335936 | MSP1214 | 30,08 | Lisbon         |
| H2NYMCCXY_SL254804 | MSP0965 | 29,97 | Fairbanks      |
| HCV72CCXY_SL269722 | MSP1219 | 29,82 | New York City  |
| HMGW3CCXY_SL342525 | MSP1876 | 29,60 | Hong Kong      |
| HMC2KCCXY_SL336736 | MSP1497 | 29,50 | Hong Kong      |
| HCY5JCCXY_SL269596 | MSP1639 | 29,32 | New York City  |
| H2NYMCCXY_SL254825 | MSP1660 | 29,15 | Rio De Janeiro |
| HCVMTCCXY_SL269605 | MSP1008 | 29,07 | New York City  |
| HMCMJCCXY_SL335925 | MSP1345 | 29,06 | Doha           |
| H7HJMCCXY_SL272755 | MSP1268 | 28,28 | Ilorin         |

Table S8

|                    |         |       |               |
|--------------------|---------|-------|---------------|
| H7KYMCCXY_SL273087 | MSP1016 | 28,15 | Fairbanks     |
| H2NYMCCXY_SL254780 | MSP1043 | 28,11 | Fairbanks     |
| HMGW3CCXY_SL342430 | MSP1839 | 27,84 | London        |
| HCY5HCCXY_SL270936 | MSP0273 | 27,82 | London        |
| H3MGVCCXY_SL259921 | MSP1907 | 27,79 | Other Control |
| HMCMJCCXY_SL335845 | MSP1223 | 27,74 | Fairbanks     |
| H3MGVCCXY_SL259966 | MSP0186 | 27,64 | Minneapolis   |
| HCV72CCXY_SL269734 | MSP1219 | 27,39 | New York City |
| H3MGVCCXY_SL259953 | MSP1907 | 26,79 | --            |
| H7HJMCCXY_SL272745 | MSP1515 | 26,68 | Ilorin        |
| H3MGVCCXY_SL259846 | MSP1612 | 26,63 | New York City |
| HT5YVCCXY_SL357298 | MSP1907 | 26,55 | Taipei        |
| HCV72CCXY_SL269799 | MSP1193 | 26,54 | New York City |
| HNHKFCCXY_SL345483 | MSP1673 | 26,50 | Hong Kong     |
| H2NYMCCXY_SL254773 | MSP1460 | 26,45 | New York City |
| HNHKFCCXY_SL345590 | MSP0546 | 26,35 | Hong Kong     |
| H75CGCCXY_SL263637 | MSP0167 | 26,30 | Auckland      |
| HMGW3CCXY_SL342529 | MSP1876 | 26,30 | Hong Kong     |
| HKC32ALXX_SL254746 | MSP1359 | 26,22 | Bogota        |
| H3MGVCCXY_SL259967 | MSP0236 | 26,13 | Tokyo         |
| HMGN5CCXY_SL344674 | MSP0717 | 26,05 | Ilorin        |
| H75CGCCXY_SL263664 | MSP0917 | 25,81 | Hamilton      |
| HCV72CCXY_SL269806 | MSP1008 | 25,54 | New York City |
| H3MGVCCXY_SL259985 | MSP1907 | 25,53 | Sao Paulo     |
| HNHKFCCXY_SL345980 | MSP1800 | 25,50 | Hong Kong     |
| HMCMJCCXY_SL335833 | MSP1664 | 25,46 | Fairbanks     |
| HKC32ALXX_SL254763 | MSP1672 | 25,44 | Ilorin        |
| HKC32ALXX_SL254675 | MSP1156 | 25,40 | Bogota        |
| HMGMHCCXY_SL343467 | MSP1434 | 25,37 | Kyiv          |
| HMGW3CCXY_SL342337 | MSP0782 | 25,33 | Naples        |



Table S8

|                    |         |       |                |
|--------------------|---------|-------|----------------|
| HKC32ALXX_SL254706 | MSP1355 | 25,26 | Ilorin         |
| HMGN5CCXY_SL344702 | MSP0437 | 25,04 | Ilorin         |
| HCY5JCCXY_SL269608 | MSP0306 | 24,83 | New York City  |
| HMC2KCCXY_SL336650 | MSP1612 | 24,76 | Hong Kong      |
| HCY5HCCXY_SL270960 | MSP1406 | 24,44 | London         |
| HCVMTCCXY_SL269603 | MSP1393 | 24,30 | New York City  |
| HCY5JCCXY_SL269611 | MSP0143 | 24,27 | New York City  |
| H3MGVCCXY_SL259912 | MSP1612 | 23,94 | New York City  |
| HMGW3CCXY_SL342474 | MSP1876 | 23,77 | Minneapolis    |
| H2NYMCCXY_SL254836 | MSP1612 | 23,74 | Rio De Janeiro |
| HT5YVCCXY_SL357401 | MSP1907 | 23,54 | Singapore      |
| H3MGVCCXY_SL259963 | MSP0750 | 23,51 | --             |
| H75CGCCXY_SL263649 | MSP0977 | 23,46 | Auckland       |
| H7KYMCCXY_SL273105 | MSP1081 | 23,38 | Fairbanks      |
| HNHKFCCXY_SL345480 | MSP1673 | 23,23 | Hong Kong      |
| HCCGHCCXY_SL270477 | MSP0820 | 23,15 | London         |
| HNHKFCCXY_SL345930 | MSP0433 | 22,91 | Hong Kong      |
| HCV72CCXY_SL269798 | MSP1664 | 22,90 | New York City  |
| H7KYMCCXY_SL273127 | MSP0656 | 22,34 | Fairbanks      |
| HCY5JCCXY_SL269590 | MSP1019 | 22,30 | New York City  |
| HNHKFCCXY_SL346127 | MSP1876 | 22,27 | Hong Kong      |
| H75CGCCXY_SL263723 | MSP0743 | 22,25 | Hamilton       |
| H7KYMCCXY_SL273060 | MSP0003 | 22,23 | Fairbanks      |
| HMC2KCCXY_SL336644 | MSP1612 | 22,16 | Hong Kong      |
| HCV72CCXY_SL269784 | MSP1436 | 22,12 | New York City  |
| HCY5JCCXY_SL269535 | MSP0765 | 22,00 | New York City  |
| HCY5HCCXY_SL270914 | MSP0765 | 21,96 | London         |
| HCVMTCCXY_SL269535 | MSP0765 | 21,75 | New York City  |
| HT5YVCCXY_SL357297 | MSP0936 | 21,60 | Taipei         |
| H7KYMCCXY_SL273121 | MSP0473 | 21,52 | Fairbanks      |

Table S8

|                    |         |       |                |
|--------------------|---------|-------|----------------|
| H75CGCCXY_SL263712 | MSP0165 | 21,50 | Hamilton       |
| HCY5JCCXY_SL269557 | MSP0273 | 21,18 | New York City  |
| H2NYMCCXY_SL254770 | MSP1166 | 21,15 | Offa           |
| HMC2KCCXY_SL336808 | MSP1034 | 21,10 | Hong Kong      |
| HK7G5CCXY_SL310981 | MSP1193 | 21,09 | Hong Kong      |
| HCCGHCCXY_SL270290 | MSP1612 | 20,68 | London         |
| HMCMJCCXY_SL335820 | MSP1788 | 20,45 | Fairbanks      |
| H7HJMCCXY_SL272753 | MSP0454 | 20,44 | Ilorin         |
| H2NYMCCXY_SL254851 | MSP1691 | 20,30 | Fairbanks      |
| HCY5JCCXY_SL269571 | MSP1541 | 20,27 | New York City  |
| H7HJMCCXY_SL272820 | MSP0715 | 20,20 | Lisbon         |
| HCY5JCCXY_SL269530 | MSP1463 | 20,17 | New York City  |
| H3MGVCCXY_SL259975 | MSP1545 | 20,15 | Minneapolis    |
| HCY5HCCXY_SL270958 | MSP1807 | 20,09 | London         |
| HMCMJCCXY_SL335844 | MSP1374 | 20,09 | Fairbanks      |
| HMCMJCCXY_SL335770 | MSP0655 | 20,09 | Denver         |
| HCV72CCXY_SL269759 | MSP0301 | 19,98 | New York City  |
| H3MGVCCXY_SL259974 | MSP0330 | 19,93 | Other Control  |
| H7HJMCCXY_SL272744 | MSP0735 | 19,82 | Ilorin         |
| HCVMTCCXY_SL269541 | MSP0660 | 19,80 | New York City  |
| H3MGVCCXY_SL259906 | MSP1907 | 19,75 | New York City  |
| H3MGVCCXY_SL259990 | MSP0330 | 19,66 | Other Control  |
| HCV72CCXY_SL269766 | MSP1372 | 19,59 | New York City  |
| HCY5HCCXY_SL270916 | MSP1664 | 19,40 | London         |
| HKC32ALXX_SL254679 | MSP0848 | 19,35 | Tokyo          |
| HMCMJCCXY_SL336225 | MSP0760 | 19,32 | Hanoi          |
| HMGW3CCXY_SL342540 | MSP1876 | 19,30 | Hong Kong      |
| H2NYMCCXY_SL254860 | MSP0831 | 18,90 | Rio De Janeiro |
| H7HJMCCXY_SL272778 | MSP1522 | 18,76 | Ilorin         |
| HK7G5CCXY_SL310979 | MSP1193 | 18,65 | Hong Kong      |

Table S8

|                    |         |       |               |
|--------------------|---------|-------|---------------|
| H7HJMCCXY_SL272821 | MSP1706 | 18,59 | Lisbon        |
| HKC32ALXX_SL254681 | MSP1346 | 18,58 | Ilorin        |
| HCVMTCCXY_SL269545 | MSP0312 | 18,54 | New York City |
| HCY5JCCXY_SL269569 | MSP0919 | 18,45 | New York City |
| HCV72CCXY_SL269769 | MSP1664 | 18,38 | New York City |
| HKC32ALXX_SL254700 | MSP1612 | 18,32 | Bogota        |
| H3MGVCCXY_SL259923 | MSP1907 | 18,23 | Sao Paulo     |
| HCY5HCCXY_SL270924 | MSP0312 | 18,15 | London        |
| HCY5HCCXY_SL270959 | MSP0898 | 18,08 | London        |
| HMC2KCCXY_SL336627 | MSP0376 | 18,07 | Hong Kong     |
| HMGTJCCXY_SL342608 | MSP1612 | 18,05 | Tokyo         |
| HMCMJCCXY_SL335773 | MSP0408 | 17,99 | Fairbanks     |
| HKC32ALXX_SL254762 | MSP0848 | 17,99 | Tokyo         |
| HCV72CCXY_SL269718 | MSP1105 | 17,98 | New York City |
| HCY5JCCXY_SL269579 | MSP1807 | 17,90 | New York City |
| HCVMTCCXY_SL269607 | MSP0400 | 17,71 | New York City |
| H7HJMCCXY_SL272766 | MSP1770 | 17,68 | Ilorin        |
| H2NYMCCXY_SL254819 | MSP1080 | 17,56 | Offa          |
| HKC32ALXX_SL254711 | MSP1612 | 17,54 | Bogota        |
| H7HJMCCXY_SL272747 | MSP1080 | 17,46 | Ilorin        |
| HMGMHCCXY_SL343483 | MSP0734 | 17,40 | Kyiv          |
| HMCMJCCXY_SL335948 | MSP0215 | 17,38 | Lisbon        |
| HCV72CCXY_SL269733 | MSP1392 | 17,29 | New York City |
| H3MGVCCXY_SL259857 | MSP0847 | 17,28 | New York City |
| HKC32ALXX_SL254725 | MSP1612 | 16,88 | Tokyo         |
| H7KYMCCXY_SL273071 | MSP1441 | 16,80 | Fairbanks     |
| HCY5HCCXY_SL270937 | MSP1393 | 16,68 | London        |
| H7HJMCCXY_SL272786 | MSP0934 | 16,65 | Ilorin        |
| HMCMJCCXY_SL335786 | MSP0111 | 16,60 | Fairbanks     |
| HCVMTCCXY_SL269565 | MSP0907 | 16,60 | New York City |

Table S8

|                     |         |       |                |
|---------------------|---------|-------|----------------|
| HCY5JCCXY_SL269565  | MSP1646 | 16,53 | New York City  |
| HNGH3CCXY_SL344575  | MSP0518 | 16,40 | Ilorin         |
| HCV72CCXY_SL269771  | MSP0279 | 16,37 | New York City  |
| H7HJMCCXY_SL272822  | MSP1080 | 16,24 | Lisbon         |
| HKC32ALXX_SL254712  | MSP0049 | 16,12 | Bogota         |
| HK7G5CCXY_SL310962  | MSP1124 | 16,04 | Hong Kong      |
| H3MGVCCXY_SL259862  | MSP1612 | 15,96 | New York City  |
| HMC MJCCXY_SL335938 | MSP1854 | 15,89 | Lisbon         |
| HMC MJCCXY_SL336180 | MSP1083 | 15,85 | Tokyo          |
| HCCGHCCXY_SL270293  | MSP1879 | 15,84 | London         |
| HCY5HCCXY_SL270984  | MSP1008 | 15,84 | London         |
| HNHKFCCXY_SL345946  | MSP1709 | 15,81 | Hong Kong      |
| HCVMTCCXY_SL269582  | MSP1289 | 15,80 | New York City  |
| H75CGCCXY_SL263686  | MSP1645 | 15,67 | Auckland       |
| HMGW3CCXY_SL342294  | MSP1881 | 15,63 | Sofia          |
| HCV72CCXY_SL269767  | MSP1697 | 15,58 | New York City  |
| H75CGCCXY_SL263650  | MSP0158 | 15,55 | Auckland       |
| HCV72CCXY_SL269776  | MSP0388 | 15,51 | New York City  |
| HCY5JCCXY_SL269573  | MSP0123 | 15,40 | New York City  |
| HCY5HCCXY_SL270975  | MSP1639 | 15,39 | London         |
| HKC32ALXX_SL254684  | MSP1612 | 15,22 | Berlin         |
| HCY5HCCXY_SL270952  | MSP0123 | 15,00 | London         |
| HCVMTCCXY_SL269612  | MSP1372 | 14,96 | New York City  |
| HCV72CCXY_SL269755  | MSP0972 | 14,96 | New York City  |
| H75CGCCXY_SL263699  | MSP0668 | 14,94 | Hamilton       |
| H7HJMCCXY_SL272808  | MSP0428 | 14,89 | Lisbon         |
| HMC2KCCXY_SL336590  | MSP1876 | 14,89 | Hong Kong      |
| H2NYMCCXY_SL254847  | MSP1566 | 14,88 | Rio De Janeiro |
| HCVMTCCXY_SL269573  | MSP0123 | 14,80 | New York City  |
| HCVMTCCXY_SL269571  | MSP1541 | 14,79 | New York City  |

Table S8

|                    |         |       |                |
|--------------------|---------|-------|----------------|
| H7HJMCCXY_SL272784 | MSP0368 | 14,73 | Ilorin         |
| HKC32ALXX_SL254688 | MSP1612 | 14,72 | Bogota         |
| HCVMTCCXY_SL269542 | MSP0123 | 14,70 | New York City  |
| HCV72CCXY_SL269792 | MSP0549 | 14,70 | New York City  |
| HKC32ALXX_SL254722 | MSP1472 | 14,65 | Bogota         |
| HK7G5CCXY_SL310952 | MSP1193 | 14,63 | Hong Kong      |
| HKC32ALXX_SL254694 | MSP0150 | 14,63 | Ilorin         |
| HCY5HCCXY_SL270986 | MSP0400 | 14,62 | London         |
| H3MGVCCXY_SL259987 | MSP1545 | 14,62 | Other Control  |
| HCY5HCCXY_SL270961 | MSP1289 | 14,55 | London         |
| H3MGVCCXY_SL259835 | MSP1128 | 14,48 | New York City  |
| HMC2KCCXY_SL336784 | MSP1876 | 14,45 | Hong Kong      |
| HKC32ALXX_SL254749 | MSP1612 | 14,35 | Tokyo          |
| H3MGVCCXY_SL259838 | MSP1193 | 14,31 | New York City  |
| HMGN5CCXY_SL344649 | MSP1371 | 14,13 | Ilorin         |
| HCV72CCXY_SL269752 | MSP0633 | 13,96 | New York City  |
| H7HJMCCXY_SL272803 | MSP0693 | 13,95 | Ilorin         |
| HCY5JCCXY_SL269570 | MSP0250 | 13,93 | New York City  |
| HMGW3CCXY_SL342298 | MSP1543 | 13,89 | Sofia          |
| H7HJMCCXY_SL272790 | MSP0624 | 13,88 | Ilorin         |
| HMCMJCCXY_SL335957 | MSP0168 | 13,87 | Lisbon         |
| HNGH3CCXY_SL344536 | MSP0706 | 13,85 | Ilorin         |
| HCV72CCXY_SL269793 | MSP0026 | 13,84 | New York City  |
| HMCMJCCXY_SL335961 | MSP1588 | 13,84 | Lisbon         |
| HMGW3CCXY_SL342295 | MSP1650 | 13,83 | Sofia          |
| HKC32ALXX_SL254742 | MSP0230 | 13,81 | Ilorin         |
| HCV72CCXY_SL269777 | MSP0924 | 13,74 | New York City  |
| HMCMJCCXY_SL335960 | MSP1084 | 13,64 | Lisbon         |
| HCVMTCCXY_SL269561 | MSP0606 | 13,63 | New York City  |
| H2NYMCCXY_SL254777 | MSP1612 | 13,59 | Rio De Janeiro |

Table S8

|                    |         |       |                |
|--------------------|---------|-------|----------------|
| H7KYMCCXY_SL273067 | MSP1613 | 13,44 | Fairbanks      |
| HNHKFCCXY_SL345508 | MSP0845 | 13,42 | Hong Kong      |
| H3MGVCCXY_SL259882 | MSP0016 | 13,34 | New York City  |
| H2NYMCCXY_SL254832 | MSP0428 | 13,33 | New York City  |
| HCCGHCCXY_SL270210 | MSP0557 | 13,33 | London         |
| H7HJMCCXY_SL272787 | MSP0075 | 13,23 | Ilorin         |
| HCV72CCXY_SL269786 | MSP0972 | 13,22 | New York City  |
| HMCMJCCXY_SL335952 | MSP0078 | 13,20 | Lisbon         |
| HCVMTCCXY_SL269597 | MSP0276 | 13,19 | New York City  |
| H2NYMCCXY_SL254790 | MSP0472 | 13,19 | Rio De Janeiro |
| H7HJMCCXY_SL272762 | MSP0058 | 13,10 | Ilorin         |
| H3MGVCCXY_SL259896 | MSP1907 | 13,09 | New York City  |
| H7HJMCCXY_SL272828 | MSP0163 | 13,01 | Lisbon         |
| HCV72CCXY_SL269743 | MSP0386 | 12,97 | New York City  |
| HK7G5CCXY_SL311017 | MSP1193 | 12,89 | Oslo           |
| HCY5HCCXY_SL270909 | MSP1463 | 12,79 | London         |
| HCY5JCCXY_SL269561 | MSP0606 | 12,78 | New York City  |
| HCY5HCCXY_SL270945 | MSP0991 | 12,59 | London         |
| H2NYMCCXY_SL254857 | MSP1612 | 12,59 | New York City  |
| H7KYMCCXY_SL273056 | MSP1390 | 12,52 | Berlin         |
| H75CGCCXY_SL263721 | MSP1286 | 12,51 | Auckland       |
| H7HJMCCXY_SL272749 | MSP1459 | 12,49 | Ilorin         |
| HCV72CCXY_SL269772 | MSP1820 | 12,30 | New York City  |
| H75CGCCXY_SL263685 | MSP1691 | 12,23 | Auckland       |
| HCY5HCCXY_SL270976 | MSP0276 | 12,22 | London         |
| HCV72CCXY_SL269754 | MSP0431 | 12,19 | New York City  |
| HCVMTCCXY_SL269566 | MSP0991 | 12,18 | New York City  |
| H75CGCCXY_SL263703 | MSP0893 | 12,16 | Porto          |
| HCY5HCCXY_SL270932 | MSP1393 | 12,13 | London         |
| HMC2KCCXY_SL336593 | MSP1876 | 12,12 | Hong Kong      |

Table S8

|                     |         |       |                |
|---------------------|---------|-------|----------------|
| HCV72CCXY_SL269765  | MSP0342 | 12,09 | New York City  |
| HMC2KCCXY_SL336638  | MSP1914 | 12,09 | Hong Kong      |
| H7KYMCCXY_SL273082  | MSP0948 | 12,02 | Fairbanks      |
| HMCMJCCXY_SL335797  | MSP1429 | 11,93 | Fairbanks      |
| HKC32ALXX_SL254707  | MSP1612 | 11,89 | Berlin         |
| H7HJMCCXY_SL272746  | MSP0061 | 11,79 | Ilorin         |
| H7HJMCCXY_SL272830  | MSP1615 | 11,77 | Other Control  |
| H7VL7CCXY_SL267266  | MSP1876 | 11,72 | Cairngorm      |
| H2NYMCCXY_SL254850  | MSP1221 | 11,64 | Rio De Janeiro |
| HCY5JCCXY_SL269601  | MSP0772 | 11,56 | New York City  |
| HK7G5CCXY_SL311022  | MSP1501 | 11,50 | Oslo           |
| H2NYMCCXY_SL254837  | MSP0428 | 11,45 | Rio De Janeiro |
| H2NYMCCXY_SL254809  | MSP1193 | 11,33 | New York City  |
| HMG TJCCXY_SL342642 | MSP1243 | 11,28 | Zurich         |
| H2NYMCCXY_SL254787  | MSP1425 | 11,15 | New York City  |
| H7HJMCCXY_SL272789  | MSP0075 | 11,13 | Ilorin         |
| HKC32ALXX_SL254758  | MSP0980 | 11,11 | Bogota         |
| H75CGCCXY_SL263724  | MSP0409 | 11,08 | Hamilton       |
| H2NYMCCXY_SL254805  | MSP1738 | 11,07 | Offa           |
| H7HJMCCXY_SL272752  | MSP0407 | 11,06 | Ilorin         |
| H7HJMCCXY_SL272764  | MSP1861 | 11,05 | Ilorin         |
| H75CGCCXY_SL263725  | MSP0409 | 10,99 | New York City  |
| HCY5JCCXY_SL269586  | MSP1253 | 10,99 | New York City  |
| HCY5JCCXY_SL269551  | MSP0972 | 10,90 | New York City  |
| HCY5JCCXY_SL269583  | MSP1884 | 10,86 | New York City  |
| H75CGCCXY_SL263647  | MSP0428 | 10,86 | Santiago       |
| HKC32ALXX_SL254705  | MSP0908 | 10,86 | Ilorin         |
| HCY5JCCXY_SL269610  | MSP1276 | 10,86 | New York City  |
| HCY5HCCXY_SL270923  | MSP1907 | 10,78 | London         |
| HMCMJCCXY_SL335819  | MSP0458 | 10,76 | New York City  |

Table S8

|                     |         |       |               |
|---------------------|---------|-------|---------------|
| H7HJMCCXY_SL272792  | MSP1021 | 10,69 | Ilorin        |
| HKC32ALXX_SL254717  | MSP0315 | 10,66 | Ilorin        |
| H2NYMCCXY_SL254820  | MSP0288 | 10,66 | New York City |
| HMC MJCCXY_SL335912 | MSP1907 | 10,62 | Doha          |
| HCV72CCXY_SL269740  | MSP0123 | 10,61 | New York City |
| HKC32ALXX_SL254676  | MSP0569 | 10,57 | Bogota        |
| HCY5HCCXY_SL270908  | MSP1091 | 10,56 | London        |
| HCVMTCCXY_SL269529  | MSP1091 | 10,56 | New York City |
| HKC32ALXX_SL254728  | MSP0377 | 10,56 | Ilorin        |
| HCY5HCCXY_SL270983  | MSP1789 | 10,51 | London        |
| H7HJMCCXY_SL272797  | MSP0058 | 10,48 | Ilorin        |
| HNHKFCCXY_SL346051  | MSP1876 | 10,36 | Seoul         |
| HCVMTCCXY_SL269604  | MSP1789 | 10,29 | New York City |
| HNHKFCCXY_SL345904  | MSP1612 | 10,26 | Hong Kong     |
| H75CGCCXY_SL263675  | MSP0687 | 10,22 | Hamilton      |
| H75CGCCXY_SL263666  | MSP0554 | 10,20 | New York City |
| H2NYMCCXY_SL254852  | MSP1613 | 10,17 | Fairbanks     |
| H7HJMCCXY_SL272779  | MSP0315 | 10,15 | Ilorin        |
| H7HJMCCXY_SL272771  | MSP1080 | 10,15 | Ilorin        |
| H2NYMCCXY_SL254781  | MSP0362 | 10,13 | Offa          |
| H75CGCCXY_SL263653  | MSP0380 | 10,12 | New York City |
| HMC MJCCXY_SL335939 | MSP0554 | 10,12 | Lisbon        |
| HCV72CCXY_SL269805  | MSP1098 | 10,11 | New York City |
| H75CGCCXY_SL263654  | MSP0315 | 10,09 | New York City |
| H7HJMCCXY_SL272824  | MSP1869 | 10,08 | Lisbon        |
| HMG TJCCXY_SL342622 | MSP0750 | 10,03 | Kuala Lumpur  |
| HKC32ALXX_SL254752  | MSP0058 | 10,02 | Ilorin        |
| HCY5HCCXY_SL271111  | MSP1907 | 10,02 | London        |
| H3MGVCCXY_SL259929  | MSP1024 | 9,94  | Other Control |
| H2NYMCCXY_SL254856  | MSP0428 | 9,92  | New York City |



Table S8

|                    |         |      |                |
|--------------------|---------|------|----------------|
| HCY5HCCXY_SL270989 | MSP0273 | 9,90 | London         |
| HCVMTCCXY_SL269601 | MSP0772 | 9,89 | New York City  |
| H75CGCCXY_SL263640 | MSP0260 | 9,78 | Hamilton       |
| HCV72CCXY_SL269742 | MSP0315 | 9,75 | New York City  |
| HKC32ALXX_SL254685 | MSP1907 | 9,73 | Santiago       |
| HCY5JCCXY_SL269560 | MSP0533 | 9,71 | New York City  |
| H2NYMCCXY_SL254827 | MSP1869 | 9,69 | Rio De Janeiro |
| H7HJMCCXY_SL272772 | MSP0058 | 9,68 | Ilorin         |
| H2NYMCCXY_SL254848 | MSP0198 | 9,66 | Rio De Janeiro |
| HCY5HCCXY_SL271171 | MSP1907 | 9,66 | London         |
| HMCMJCCXY_SL335954 | MSP0315 | 9,65 | Lisbon         |
| HCY5HCCXY_SL270948 | MSP0919 | 9,64 | London         |
| HK7G5CCXY_SL311016 | MSP1193 | 9,61 | Oslo           |
| H2NYMCCXY_SL254817 | MSP0058 | 9,59 | Offa           |
| H75CGCCXY_SL263688 | MSP1696 | 9,58 | Hamilton       |
| HCVMTCCXY_SL269619 | MSP0400 | 9,56 | New York City  |
| HCY5JCCXY_SL269566 | MSP0991 | 9,55 | New York City  |
| HCV72CCXY_SL269749 | MSP0213 | 9,50 | New York City  |
| HCVMTCCXY_SL269610 | MSP0273 | 9,49 | New York City  |
| H75CGCCXY_SL263702 | MSP0961 | 9,46 | New York City  |
| H7HJMCCXY_SL272802 | MSP0640 | 9,45 | Ilorin         |
| HMCMJCCXY_SL335795 | MSP0642 | 9,35 | New York City  |
| HK7G5CCXY_SL311009 | MSP1193 | 9,34 | Hong Kong      |
| HCY5HCCXY_SL271110 | MSP1393 | 9,33 | London         |
| H2NYMCCXY_SL254846 | MSP0428 | 9,29 | New York City  |
| H7HJMCCXY_SL272823 | MSP0458 | 9,29 | Lisbon         |
| H2NYMCCXY_SL254782 | MSP1827 | 9,26 | Offa           |
| HCV72CCXY_SL269731 | MSP0915 | 9,26 | New York City  |
| HCVMTCCXY_SL269574 | MSP1372 | 9,22 | New York City  |
| HNHKFCCXY_SL345538 | MSP1893 | 9,22 | Hong Kong      |

Table S8

|                    |         |      |                |
|--------------------|---------|------|----------------|
| H7KYMCCXY_SL273090 | MSP1243 | 9,21 | Berlin         |
| HCY5HCCXY_SL270934 | MSP0196 | 9,21 | London         |
| H2NYMCCXY_SL254841 | MSP0315 | 9,14 | Offa           |
| H2NYMCCXY_SL254844 | MSP1308 | 9,11 | New York City  |
| H7HJMCCXY_SL272799 | MSP1164 | 9,08 | Ilorin         |
| HCY5JCCXY_SL269526 | MSP0850 | 9,07 | New York City  |
| H2NYMCCXY_SL254778 | MSP0133 | 9,05 | Rio De Janeiro |
| HCV72CCXY_SL269785 | MSP0527 | 9,02 | New York City  |
| HCCGHCCXY_SL270411 | MSP1612 | 9,00 | London         |
| HCY5JCCXY_SL269600 | MSP0928 | 8,95 | New York City  |
| HMGW3CCXY_SL342603 | MSP0869 | 8,91 | Tokyo          |
| H7KYMCCXY_SL273035 | MSP1809 | 8,87 | Fairbanks      |
| H7HJMCCXY_SL272777 | MSP0061 | 8,85 | Ilorin         |
| HCVMTCCXY_SL269526 | MSP0850 | 8,84 | New York City  |
| HCY5JCCXY_SL269536 | MSP0799 | 8,79 | New York City  |
| HNHKFCCXY_SL345993 | MSP1088 | 8,70 | Hong Kong      |
| HCY5JCCXY_SL269527 | MSP0155 | 8,69 | New York City  |
| HMCMJCCXY_SL335843 | MSP0458 | 8,68 | New York City  |
| HCY5JCCXY_SL269599 | MSP0448 | 8,64 | New York City  |
| H3KHWCCXY_SL263369 | MSP1514 | 8,63 | Porto          |
| HCV72CCXY_SL269757 | MSP0113 | 8,60 | New York City  |
| HKC32ALXX_SL254716 | MSP1080 | 8,60 | Ilorin         |
| HCVMTCCXY_SL269538 | MSP0197 | 8,60 | New York City  |
| H75CGCCXY_SL263651 | MSP0771 | 8,59 | Hamilton       |
| HKC32ALXX_SL254698 | MSP1876 | 8,58 | Santiago       |
| H7HJMCCXY_SL272814 | MSP1918 | 8,55 | Lisbon         |
| H7HJMCCXY_SL272806 | MSP0315 | 8,52 | Lisbon         |
| H75CGCCXY_SL263700 | MSP1102 | 8,48 | Hamilton       |
| HCV72CCXY_SL269761 | MSP1173 | 8,48 | New York City  |
| HMGMHCCXY_SL343453 | MSP1876 | 8,48 | Kyiv           |

Table S8

|                     |         |      |               |
|---------------------|---------|------|---------------|
| H3KHWCCXY_SL263315  | MSP0389 | 8,45 | Porto         |
| H7HJMCCXY_SL272816  | MSP0756 | 8,43 | Lisbon        |
| H7HJMCCXY_SL272788  | MSP0058 | 8,40 | Ilorin        |
| HKC32ALXX_SL254740  | MSP0058 | 8,39 | Ilorin        |
| HMC MJCCXY_SL335783 | MSP0314 | 8,37 | New York City |
| HCVMTCCXY_SL269600  | MSP0928 | 8,35 | New York City |
| H75CGCCXY_SL263677  | MSP1805 | 8,34 | New York City |
| HKC32ALXX_SL254718  | MSP0315 | 8,32 | Ilorin        |
| HMC MJCCXY_SL335950 | MSP1421 | 8,29 | Lisbon        |
| HMC MJCCXY_SL335888 | MSP1904 | 8,24 | Doha          |
| HKC32ALXX_SL254699  | MSP1612 | 8,24 | Bogota        |
| HMC MJCCXY_SL335741 | MSP0686 | 8,22 | Control       |
| HCVMTCCXY_SL269599  | MSP0448 | 8,21 | New York City |
| HCY5HCCXY_SL270978  | MSP0448 | 8,20 | London        |
| HCY5HCCXY_SL271138  | MSP1907 | 8,20 | London        |
| HCVMTCCXY_SL269527  | MSP0160 | 8,16 | New York City |
| HMC MJCCXY_SL335807 | MSP0428 | 8,16 | New York City |
| H7HJMCCXY_SL272743  | MSP0061 | 8,15 | Ilorin        |
| HMGW3CCXY_SL342291  | MSP0750 | 8,14 | Doha          |
| HMC MJCCXY_SL336172 | MSP0956 | 8,11 | Tokyo         |
| H75CGCCXY_SL263687  | MSP0250 | 8,09 | Hamilton      |
| HCY5JCCXY_SL269564  | MSP0758 | 8,07 | New York City |
| HCV72CCXY_SL269751  | MSP0375 | 8,04 | New York City |
| HCVMTCCXY_SL269617  | MSP0750 | 8,03 | New York City |
| HCVMTCCXY_SL269559  | MSP0903 | 8,03 | New York City |
| H75CGCCXY_SL263678  | MSP0791 | 7,99 | New York City |
| H75CGCCXY_SL263726  | MSP0078 | 7,99 | New York City |
| HCY5HCCXY_SL270938  | MSP0903 | 7,92 | London        |
| H2NYMCCXY_SL254810  | MSP0428 | 7,87 | New York City |
| H7HJMCCXY_SL272756  | MSP0739 | 7,84 | Ilorin        |

Table S8

|                     |         |      |                |
|---------------------|---------|------|----------------|
| HCY5HCCXY_SL270906  | MSP0155 | 7,81 | London         |
| HMC MJCCXY_SL335794 | MSP0642 | 7,78 | New York City  |
| HCV72CCXY_SL269750  | MSP1389 | 7,75 | New York City  |
| HCY5HCCXY_SL270917  | MSP0197 | 7,66 | London         |
| HMC MJCCXY_SL335956 | MSP0334 | 7,65 | Lisbon         |
| HNHKFCCXY_SL345969  | MSP1612 | 7,59 | Hong Kong      |
| H2NYMCCXY_SL254779  | MSP1510 | 7,58 | Rio De Janeiro |
| HCVMTCCXY_SL269564  | MSP0758 | 7,54 | New York City  |
| H2NYMCCXY_SL254807  | MSP0061 | 7,52 | Offa           |
| H7HJMCCXY_SL272807  | MSP0512 | 7,51 | Lisbon         |
| HCY5JCCXY_SL269532  | MSP0345 | 7,48 | New York City  |
| HCY5HCCXY_SL270928  | MSP1089 | 7,45 | London         |
| HMG N5CCXY_SL344634 | MSP1795 | 7,45 | Ilorin         |
| HCV72CCXY_SL269758  | MSP1305 | 7,41 | New York City  |
| HKC32ALXX_SL254726  | MSP0910 | 7,35 | Tokyo          |
| H75CGCCXY_SL263689  | MSP0860 | 7,29 | New York City  |
| HCV72CCXY_SL269783  | MSP0662 | 7,25 | New York City  |
| H7HJMCCXY_SL272740  | MSP1918 | 7,25 | Ilorin         |
| HCY5HCCXY_SL271097  | MSP1393 | 7,23 | London         |
| HCV72CCXY_SL269724  | MSP0972 | 7,22 | New York City  |
| H7HJMCCXY_SL272791  | MSP0315 | 7,22 | Ilorin         |
| HMC MJCCXY_SL335940 | MSP0178 | 7,19 | Lisbon         |
| HCY5HCCXY_SL271153  | MSP1907 | 7,18 | London         |
| H2NYMCCXY_SL254831  | MSP0164 | 7,17 | Offa           |
| H2NYMCCXY_SL254839  | MSP0761 | 7,17 | Rio De Janeiro |
| H7HJMCCXY_SL272826  | MSP0078 | 7,16 | Lisbon         |
| HKC32ALXX_SL254765  | MSP0363 | 7,15 | Ilorin         |
| H7HJMCCXY_SL272794  | MSP0504 | 7,13 | Ilorin         |
| HCV72CCXY_SL269719  | MSP0241 | 7,08 | New York City  |
| H7HJMCCXY_SL272751  | MSP1548 | 7,03 | Ilorin         |

Table S8

|                    |         |      |                |
|--------------------|---------|------|----------------|
| HKC32ALXX_SL254692 | MSP0058 | 7,01 | Ilorin         |
| HCY5JCCXY_SL269534 | MSP0044 | 7,01 | New York City  |
| H7HJMCCXY_SL272804 | MSP0559 | 6,97 | Lisbon         |
| H7HJMCCXY_SL272776 | MSP0061 | 6,95 | Ilorin         |
| HCY5HCCXY_SL270953 | MSP1372 | 6,95 | London         |
| H2NYMCCXY_SL254849 | MSP0428 | 6,94 | Rio De Janeiro |
| HCV72CCXY_SL269717 | MSP0315 | 6,88 | New York City  |
| H2NYMCCXY_SL254772 | MSP1657 | 6,88 | Offa           |
| H7HJMCCXY_SL272793 | MSP0058 | 6,87 | Ilorin         |
| H2NYMCCXY_SL254859 | MSP1685 | 6,86 | Rio De Janeiro |
| H7HJMCCXY_SL272754 | MSP1654 | 6,83 | Ilorin         |
| HKC32ALXX_SL254764 | MSP0150 | 6,83 | Ilorin         |
| H2NYMCCXY_SL254795 | MSP0058 | 6,77 | Offa           |
| HNHKFCCXY_SL345945 | MSP1612 | 6,67 | Hong Kong      |
| HCV72CCXY_SL269744 | MSP0599 | 6,67 | New York City  |
| HCCGHCCXY_SL270206 | MSP0436 | 6,64 | London         |
| H7HJMCCXY_SL272783 | MSP0058 | 6,63 | Ilorin         |
| H2NYMCCXY_SL254861 | MSP0024 | 6,63 | Rio De Janeiro |
| HCY5JCCXY_SL269559 | MSP1756 | 6,62 | New York City  |
| H3KHWCCXY_SL263364 | MSP0953 | 6,59 | Porto          |
| HCVMTCCXY_SL269593 | MSP0536 | 6,51 | New York City  |
| HCY5HCCXY_SL270929 | MSP0342 | 6,51 | London         |
| H3KHWCCXY_SL263311 | MSP1322 | 6,50 | Porto          |
| HCVMTCCXY_SL269548 | MSP0085 | 6,49 | New York City  |
| HCVMTCCXY_SL269532 | MSP0345 | 6,48 | New York City  |
| H7HJMCCXY_SL272768 | MSP0315 | 6,43 | Ilorin         |
| HCV72CCXY_SL269747 | MSP1620 | 6,42 | New York City  |
| HMGMHCCXY_SL343449 | MSP1081 | 6,42 | Kyiv           |
| H7HJMCCXY_SL272748 | MSP0315 | 6,41 | Ilorin         |
| H75CGCCXY_SL263713 | MSP0446 | 6,34 | New York City  |

Table S8

|                     |         |      |               |
|---------------------|---------|------|---------------|
| HCY5HCCXY_SL270996  | MSP0750 | 6,34 | London        |
| HKC32ALXX_SL254739  | MSP0648 | 6,32 | Tokyo         |
| H75CGCCXY_SL263665  | MSP1376 | 6,32 | New York City |
| HKC32ALXX_SL254747  | MSP1619 | 6,32 | Bogota        |
| HCY5JCCXY_SL269575  | MSP0452 | 6,31 | New York City |
| H75CGCCXY_SL263709  | MSP1251 | 6,29 | Auckland      |
| HCCGHCCXY_SL270510  | MSP0750 | 6,27 | London        |
| HMC MJCCXY_SL335949 | MSP0962 | 6,27 | Lisbon        |
| HCVMTCCXY_SL269598  | MSP0515 | 6,27 | New York City |
| H75CGCCXY_SL263663  | MSP0369 | 6,26 | Hamilton      |
| HCY5HCCXY_SL270977  | MSP0515 | 6,26 | London        |
| HKC32ALXX_SL254757  | MSP0142 | 6,25 | Santiago      |
| HCV72CCXY_SL269723  | MSP1316 | 6,22 | New York City |
| HCCGHCCXY_SL270315  | MSP0750 | 6,18 | London        |
| HMC MJCCXY_SL335851 | MSP0458 | 6,16 | New York City |
| H2NYMCCXY_SL254798  | MSP1612 | 6,16 | New York City |
| H7HJMCCXY_SL272827  | MSP1850 | 6,14 | Lisbon        |
| HCV72CCXY_SL269789  | MSP1063 | 6,13 | New York City |
| HCY5JCCXY_SL269598  | MSP0515 | 6,12 | New York City |
| HCY5HCCXY_SL270911  | MSP0345 | 6,06 | London        |
| HCY5HCCXY_SL270997  | MSP0272 | 6,06 | London        |
| HKC32ALXX_SL254766  | MSP0315 | 6,06 | Berlin        |
| HCY5HCCXY_SL270988  | MSP0078 | 6,04 | London        |
| H2NYMCCXY_SL254808  | MSP0554 | 6,04 | New York City |
| H75CGCCXY_SL263696  | MSP0474 | 6,01 | Santiago      |
| HCY5JCCXY_SL269538  | MSP0197 | 5,99 | New York City |
| H2NYMCCXY_SL254830  | MSP1298 | 5,95 | Offa          |
| H2NYMCCXY_SL254855  | MSP1918 | 5,95 | Offa          |
| HCY5HCCXY_SL270942  | MSP0878 | 5,90 | London        |
| HCY5JCCXY_SL269588  | MSP0704 | 5,87 | New York City |

Table S8

|                     |         |      |                |
|---------------------|---------|------|----------------|
| H2NYMCCXY_SL254776  | MSP0915 | 5,81 | Rio De Janeiro |
| HMC MJCCXY_SL335937 | MSP1576 | 5,79 | Lisbon         |
| H75CGCCXY_SL263690  | MSP1747 | 5,79 | New York City  |
| HCY5HCCXY_SL270973  | MSP0260 | 5,77 | London         |
| HCY5HCCXY_SL270962  | MSP1884 | 5,77 | London         |
| HKC32ALXX_SL254719  | MSP1907 | 5,73 | Berlin         |
| HCCGHCCXY_SL270257  | MSP1260 | 5,73 | London         |
| HCVMTCCXY_SL269609  | MSP0078 | 5,73 | New York City  |
| H7HJMCCXY_SL272775  | MSP1918 | 5,71 | Ilorin         |
| HCV72CCXY_SL269753  | MSP0878 | 5,70 | New York City  |
| HCV72CCXY_SL269728  | MSP0900 | 5,69 | New York City  |
| H2NYMCCXY_SL254783  | MSP0432 | 5,66 | Offa           |
| H7HJMCCXY_SL272801  | MSP0381 | 5,64 | Ilorin         |
| HCY5HCCXY_SL270943  | MSP0758 | 5,63 | London         |
| H7HJMCCXY_SL272800  | MSP1080 | 5,62 | Ilorin         |
| HKC32ALXX_SL254680  | MSP0554 | 5,55 | Ilorin         |
| HKC32ALXX_SL254696  | MSP1907 | 5,54 | Berlin         |
| HCV72CCXY_SL269762  | MSP0779 | 5,53 | New York City  |
| H7HJMCCXY_SL272796  | MSP0987 | 5,51 | Ilorin         |
| H7HJMCCXY_SL272769  | MSP0524 | 5,51 | Ilorin         |
| HCVMTCCXY_SL269588  | MSP0704 | 5,50 | New York City  |
| HMC MJCCXY_SL335941 | MSP1082 | 5,50 | Lisbon         |
| HCV72CCXY_SL269730  | MSP1598 | 5,45 | New York City  |
| H2NYMCCXY_SL254854  | MSP0058 | 5,44 | Offa           |
| HCY5HCCXY_SL270956  | MSP1260 | 5,39 | London         |
| H7HJMCCXY_SL272813  | MSP0382 | 5,39 | Lisbon         |
| H2NYMCCXY_SL254842  | MSP1361 | 5,29 | Offa           |
| HCY5HCCXY_SL270981  | MSP0540 | 5,23 | London         |
| HCY5JCCXY_SL269563  | MSP1169 | 5,19 | New York City  |
| H7HJMCCXY_SL272759  | MSP0029 | 5,19 | Ilorin         |

Table S8

|                     |         |      |                |
|---------------------|---------|------|----------------|
| HCY5HCCXY_SL271123  | MSP1260 | 5,17 | London         |
| H75CGCCXY_SL263652  | MSP0554 | 5,13 | Hamilton       |
| HCVMTCXY_SL269546   | MSP0260 | 5,11 | New York City  |
| HCY5HCCXY_SL270915  | MSP0799 | 5,08 | London         |
| H7HJMCCXY_SL272741  | MSP1918 | 5,05 | Ilorin         |
| H2NYMCCXY_SL254858  | MSP0428 | 5,05 | New York City  |
| H2NYMCCXY_SL254814  | MSP0315 | 4,96 | Rio De Janeiro |
| HCY5HCCXY_SL270967  | MSP0704 | 4,94 | London         |
| HCY5HCCXY_SL270946  | MSP1260 | 4,92 | London         |
| HCY5JCCXY_SL269609  | MSP0078 | 4,84 | New York City  |
| H2NYMCCXY_SL254826  | MSP1687 | 4,81 | Rio De Janeiro |
| H75CGCCXY_SL263641  | MSP0001 | 4,77 | New York City  |
| HCCGHCCXY_SL270438  | MSP1612 | 4,75 | London         |
| HKC32ALXX_SL254723  | MSP1612 | 4,74 | Bogota         |
| HMC MJCCXY_SL335947 | MSP0554 | 4,73 | Lisbon         |
| H2NYMCCXY_SL254784  | MSP1838 | 4,64 | Offa           |
| HKC32ALXX_SL254677  | MSP1907 | 4,63 | Tokyo          |
| H75CGCCXY_SL263714  | MSP0530 | 4,56 | New York City  |
| HKC32ALXX_SL254751  | MSP1612 | 4,55 | Tokyo          |
| HCY5JCCXY_SL269546  | MSP0260 | 4,53 | New York City  |
| H2NYMCCXY_SL254829  | MSP0458 | 4,50 | Offa           |
| HCV72CCXY_SL269773  | MSP0946 | 4,50 | New York City  |
| HMC MJCCXY_SL335946 | MSP0458 | 4,49 | Lisbon         |
| HCY5HCCXY_SL270939  | MSP0533 | 4,47 | London         |
| H2NYMCCXY_SL254806  | MSP1295 | 4,27 | Offa           |
| HMC MJCCXY_SL335878 | MSP1907 | 4,24 | Doha           |
| HKC32ALXX_SL254697  | MSP1260 | 4,22 | Santiago       |
| H7HJMCCXY_SL272761  | MSP1204 | 4,18 | Ilorin         |
| HKC32ALXX_SL254750  | MSP1193 | 4,15 | Tokyo          |
| H7HJMCCXY_SL272770  | MSP0315 | 4,15 | Ilorin         |



Table S8

|                     |         |      |                |
|---------------------|---------|------|----------------|
| H7HJMCCXY_SL272780  | MSP1771 | 4,10 | Ilorin         |
| HCY5HCCXY_SL270971  | MSP0523 | 4,01 | London         |
| H2NYMCCXY_SL254793  | MSP1388 | 3,91 | Offa           |
| H2NYMCCXY_SL254853  | MSP0315 | 3,88 | Offa           |
| H7HJMCCXY_SL272757  | MSP0274 | 3,84 | Ilorin         |
| H2NYMCCXY_SL254843  | MSP0458 | 3,78 | Offa           |
| H7HJMCCXY_SL272773  | MSP0278 | 3,77 | Ilorin         |
| HCV72CCXY_SL269748  | MSP0627 | 3,73 | New York City  |
| H2NYMCCXY_SL254771  | MSP0564 | 3,63 | Offa           |
| HCY5HCCXY_SL270912  | MSP1907 | 3,57 | London         |
| H75CGCCXY_SL263716  | MSP0530 | 3,56 | Porto          |
| H7HJMCCXY_SL272738  | MSP0554 | 3,48 | Ilorin         |
| H2NYMCCXY_SL254796  | MSP1838 | 3,46 | New York City  |
| H7HJMCCXY_SL272742  | MSP1186 | 3,46 | Ilorin         |
| H7HJMCCXY_SL272832  | MSP0186 | 3,42 | Other Control  |
| HCV72CCXY_SL269732  | MSP1393 | 3,42 | New York City  |
| H7HJMCCXY_SL272774  | MSP0254 | 3,41 | Ilorin         |
| H7HJMCCXY_SL272765  | MSP0552 | 3,37 | Ilorin         |
| HMC MJCCXY_SL335842 | MSP0186 | 3,37 | New York City  |
| H2NYMCCXY_SL254788  | MSP1613 | 3,26 | Rio De Janeiro |
| H2NYMCCXY_SL254838  | MSP1687 | 3,22 | Rio De Janeiro |
| H7HJMCCXY_SL272798  | MSP0554 | 3,20 | Ilorin         |
| H2NYMCCXY_SL254818  | MSP1918 | 3,17 | Offa           |
| H2NYMCCXY_SL254791  | MSP0430 | 3,08 | Rio De Janeiro |
| H2NYMCCXY_SL254794  | MSP1080 | 2,96 | Offa           |

Table S9

**Supplementary Table S9. Significance of the mean abundance of ARGs carriers versus non-carriers.** We carried out two different approaches for testing the mean abundance of the two groups as described in Material and Methods. The asterisk (\*) shows the number of tests below  $p < 0.05$ .

| Cities          | p-values |             |
|-----------------|----------|-------------|
|                 | ttest    | permutation |
| Auckland        | 0,952    | 0,071       |
| Berlin          | 0,938    | 0,399       |
| Bogota          | 0,290    | 0,058       |
| Cairngorm       | 0,602    | 0,398       |
| Denver*         | 0,048    | 0,514       |
| Doha**          | 0,030    | 0,001       |
| Fairbanks       | 0,706    | 0,445       |
| Hamilton**      | 0,007    | 0,000       |
| Hanoi**         | 0,031    | 0,000       |
| Hong Kong*      | 0,039    | 0,832       |
| Ilorin**        | 0,010    | 0,014       |
| Kuala Lumpur**  | 0,020    | 0,001       |
| Kyiv**          | 0,016    | 0,000       |
| Lisbon**        | 0,020    | 0,004       |
| London**        | 0,020    | 0,000       |
| Marseille       | 0,514    | 0,151       |
| Minneapolis*    | 0,000    | 0,552       |
| Naples          | 0,654    | 0,319       |
| New York City** | 0,016    | 0,000       |
| Offa**          | 0,000    | 0,000       |
| Oslo            | 0,064    | 0,572       |
| Others*         | 0,090    | 0,002       |
| Porto           | 0,560    | 0,236       |
| Rio de Janeiro* | 0,084    | 0,006       |
| Santiago        | 0,978    | 0,394       |
| Sao Paulo       | 0,990    | 0,275       |
| Seoul           | 0,346    | 0,665       |
| Singapore       | 0,486    | 0,186       |
| Sofia           | 0,946    | 0,299       |
| Taipei*         | 0,035    | 0,486       |
| Tokyo           | 0,324    | 0,152       |
| Vienna          | 0,524    | 0,277       |
| Zurich          | 0,407    | 0,460       |

## Supplementry Table S10. GenBank Accession Numbers of Putative Phage Genomes (PPGs)

These phage sequences are also available from <http://www.iq.usp.br/setubal/metasubphages/ppgsequences.fasta>

| PPG     | ACCESSION | PPG     | ACCESSION | PPG     | ACCESSION | PPG     | ACCESSION | PPG     | ACCESSION |
|---------|-----------|---------|-----------|---------|-----------|---------|-----------|---------|-----------|
| MSP0001 | OR222109  | MSP0368 | OR222566  | MSP0747 | OR222221  | MSP1125 | OR221877  | MSP1539 | OR221540  |
| MSP0002 | OR222107  | MSP0369 | OR222569  | MSP0748 | OR222222  | MSP1126 | OR221879  | MSP1540 | OR221531  |
| MSP0003 | OR222104  | MSP0370 | OR222562  | MSP0749 | OR222223  | MSP1127 | OR221878  | MSP1541 | OR221533  |
| MSP0004 | OR222108  | MSP0371 | OR222564  | MSP0750 | OR222217  | MSP1128 | OR221883  | MSP1542 | OR221534  |
| MSP0005 | OR222105  | MSP0372 | OR222563  | MSP0751 | OR222218  | MSP1129 | OR221872  | MSP1543 | OR221535  |
| MSP0006 | OR222106  | MSP0373 | OR222559  | MSP0753 | OR222219  | MSP1130 | OR221873  | MSP1545 | OR221537  |
| MSP0007 | OR222103  | MSP0374 | OR222560  | MSP0754 | OR222220  | MSP1131 | OR221875  | MSP1546 | OR221525  |
| MSP0008 | OR222102  | MSP0375 | OR222561  | MSP0755 | OR222212  | MSP1133 | OR221874  | MSP1547 | OR221527  |
| MSP0010 | OR222100  | MSP0376 | OR222556  | MSP0756 | OR222214  | MSP1134 | OR221876  | MSP1548 | OR221529  |
| MSP0011 | OR222101  | MSP0377 | OR222558  | MSP0757 | OR222215  | MSP1135 | OR221869  | MSP1549 | OR221532  |
| MSP0012 | OR222099  | MSP0378 | OR222557  | MSP0758 | OR222216  | MSP1136 | OR221868  | MSP1551 | OR221530  |
| MSP0013 | OR222098  | MSP0379 | OR222552  | MSP0759 | OR222209  | MSP1137 | OR221870  | MSP1553 | OR221523  |
| MSP0014 | OR222095  | MSP0380 | OR222554  | MSP0760 | OR222210  | MSP1138 | OR221871  | MSP1554 | OR221520  |
| MSP0015 | OR222096  | MSP0381 | OR222555  | MSP0761 | OR222211  | MSP1139 | OR221865  | MSP1556 | OR221521  |
| MSP0016 | OR222097  | MSP0382 | OR222551  | MSP0762 | OR222213  | MSP1141 | OR221864  | MSP1557 | OR221524  |
| MSP0017 | OR222092  | MSP0383 | OR222553  | MSP0763 | OR222205  | MSP1142 | OR221866  | MSP1558 | OR221526  |
| MSP0018 | OR222094  | MSP0384 | OR222548  | MSP0764 | OR222206  | MSP1143 | OR221867  | MSP1559 | OR221528  |
| MSP0019 | OR222093  | MSP0385 | OR222547  | MSP0765 | OR222207  | MSP1144 | OR221858  | MSP1560 | OR221516  |
| MSP0020 | OR222090  | MSP0386 | OR222549  | MSP0766 | OR222208  | MSP1145 | OR221860  | MSP1561 | OR221519  |
| MSP0022 | OR222091  | MSP0387 | OR222550  | MSP0767 | OR222204  | MSP1147 | OR221861  | MSP1562 | OR221517  |
| MSP0023 | OR222089  | MSP0388 | OR222545  | MSP0768 | OR222201  | MSP1149 | OR221863  | MSP1563 | OR221518  |
| MSP0024 | OR222088  | MSP0389 | OR222546  | MSP0769 | OR222202  | MSP1151 | OR221862  | MSP1564 | OR221522  |
| MSP0025 | OR222087  | MSP0391 | OR222542  | MSP0771 | OR222203  | MSP1152 | OR221854  | MSP1565 | OR221511  |
| MSP0026 | OR222085  | MSP0392 | OR222544  | MSP0772 | OR222199  | MSP1153 | OR221855  | MSP1566 | OR221514  |
| MSP0027 | OR222084  | MSP0393 | OR222540  | MSP0774 | OR222197  | MSP1154 | OR221857  | MSP1567 | OR221512  |
| MSP0028 | OR222082  | MSP0396 | OR222543  | MSP0775 | OR222200  | MSP1155 | OR221856  | MSP1568 | OR221513  |
| MSP0029 | OR222086  | MSP0398 | OR222541  | MSP0776 | OR222193  | MSP1156 | OR221859  | MSP1569 | OR221515  |
| MSP0030 | OR222083  | MSP0399 | OR222538  | MSP0777 | OR222194  | MSP1157 | OR221848  | MSP1570 | OR221510  |
| MSP0031 | OR222081  | MSP0400 | OR222539  | MSP0779 | OR222196  | MSP1158 | OR221850  | MSP1571 | OR221505  |
| MSP0032 | OR222080  | MSP0401 | OR222535  | MSP0781 | OR222198  | MSP1159 | OR221851  | MSP1572 | OR221506  |
| MSP0033 | OR222079  | MSP0402 | OR222534  | MSP0782 | OR222190  | MSP1160 | OR221852  | MSP1573 | OR221507  |
| MSP0034 | OR222078  | MSP0403 | OR222537  | MSP0783 | OR222191  | MSP1161 | OR221853  | MSP1574 | OR221508  |

|         |          |         |          |         |          |         |          |         |          |
|---------|----------|---------|----------|---------|----------|---------|----------|---------|----------|
| MSP0035 | OR222076 | MSP0404 | OR222536 | MSP0784 | OR222192 | MSP1162 | OR221845 | MSP1575 | OR221509 |
| MSP0036 | OR222077 | MSP0405 | OR222532 | MSP0785 | OR222195 | MSP1163 | OR221847 | MSP1576 | OR221500 |
| MSP0037 | OR222074 | MSP0406 | OR222533 | MSP0786 | OR222187 | MSP1164 | OR221846 | MSP1577 | OR221501 |
| MSP0038 | OR222073 | MSP0407 | OR222530 | MSP0787 | OR222189 | MSP1166 | OR221849 | MSP1578 | OR221502 |
| MSP0040 | OR222075 | MSP0408 | OR222531 | MSP0788 | OR222188 | MSP1167 | OR221840 | MSP1579 | OR221503 |
| MSP0041 | OR222072 | MSP0409 | OR222527 | MSP0789 | OR222184 | MSP1169 | OR221841 | MSP1580 | OR221504 |
| MSP0042 | OR222070 | MSP0410 | OR222525 | MSP0790 | OR222182 | MSP1170 | OR221842 | MSP1581 | OR221495 |
| MSP0043 | OR222071 | MSP0411 | OR222529 | MSP0791 | OR222185 | MSP1171 | OR221843 | MSP1582 | OR221496 |
| MSP0044 | OR222069 | MSP0412 | OR222524 | MSP0792 | OR222186 | MSP1172 | OR221844 | MSP1583 | OR221497 |
| MSP0045 | OR222066 | MSP0414 | OR222528 | MSP0793 | OR222179 | MSP1173 | OR221835 | MSP1584 | OR221498 |
| MSP0046 | OR222068 | MSP0415 | OR222526 | MSP0794 | OR222180 | MSP1174 | OR221836 | MSP1585 | OR221499 |
| MSP0047 | OR222065 | MSP0417 | OR222521 | MSP0795 | OR222181 | MSP1175 | OR221837 | MSP1586 | OR221489 |
| MSP0048 | OR222064 | MSP0418 | OR222523 | MSP0796 | OR222183 | MSP1176 | OR221838 | MSP1587 | OR221490 |
| MSP0049 | OR222067 | MSP0419 | OR222519 | MSP0797 | OR222174 | MSP1178 | OR221839 | MSP1588 | OR221491 |
| MSP0050 | OR222063 | MSP0420 | OR222520 | MSP0798 | OR222176 | MSP1179 | OR221831 | MSP1589 | OR221492 |
| MSP0051 | OR222060 | MSP0421 | OR222522 | MSP0799 | OR222177 | MSP1180 | OR221832 | MSP1590 | OR221493 |
| MSP0052 | OR222062 | MSP0423 | OR222516 | MSP0800 | OR222178 | MSP1181 | OR221833 | MSP1591 | OR221494 |
| MSP0054 | OR222061 | MSP0428 | OR222518 | MSP0801 | OR222172 | MSP1182 | OR221834 | MSP1592 | OR221484 |
| MSP0055 | OR222058 | MSP0429 | OR222517 | MSP0803 | OR222171 | MSP1183 | OR221826 | MSP1593 | OR221485 |
| MSP0056 | OR222059 | MSP0430 | OR222510 | MSP0804 | OR222173 | MSP1184 | OR221827 | MSP1594 | OR221487 |
| MSP0057 | OR222056 | MSP0431 | OR222512 | MSP0805 | OR222175 | MSP1185 | OR221828 | MSP1595 | OR221486 |
| MSP0058 | OR222057 | MSP0432 | OR222515 | MSP0806 | OR222166 | MSP1186 | OR221829 | MSP1597 | OR221488 |
| MSP0059 | OR222055 | MSP0433 | OR222513 | MSP0807 | OR222168 | MSP1187 | OR221830 | MSP1598 | OR221479 |
| MSP0060 | OR222053 | MSP0434 | OR222511 | MSP0808 | OR222169 | MSP1188 | OR221820 | MSP1599 | OR221480 |
| MSP0061 | OR222054 | MSP0435 | OR222514 | MSP0809 | OR222170 | MSP1189 | OR221821 | MSP1600 | OR221482 |
| MSP0062 | OR222052 | MSP0436 | OR222906 | MSP0810 | OR222163 | MSP1190 | OR221823 | MSP1601 | OR221481 |
| MSP0063 | OR222050 | MSP0437 | OR222907 | MSP0812 | OR222165 | MSP1192 | OR221824 | MSP1602 | OR221483 |
| MSP0064 | OR222051 | MSP0438 | OR222908 | MSP0813 | OR222164 | MSP1193 | OR221825 | MSP1603 | OR221474 |
| MSP0065 | OR222048 | MSP0440 | OR222909 | MSP0814 | OR222167 | MSP1194 | OR221816 | MSP1604 | OR221477 |
| MSP0066 | OR222049 | MSP0441 | OR222904 | MSP0815 | OR222159 | MSP1195 | OR221817 | MSP1605 | OR221475 |
| MSP0067 | OR222046 | MSP0442 | OR222905 | MSP0817 | OR222158 | MSP1197 | OR221818 | MSP1606 | OR221476 |
| MSP0068 | OR222047 | MSP0443 | OR222899 | MSP0818 | OR222160 | MSP1198 | OR221819 | MSP1607 | OR221478 |
| MSP0069 | OR222045 | MSP0444 | OR222900 | MSP0819 | OR222161 | MSP1199 | OR221822 | MSP1608 | OR221468 |

|         |          |         |          |         |          |         |          |         |          |
|---------|----------|---------|----------|---------|----------|---------|----------|---------|----------|
| MSP0070 | OR222043 | MSP0445 | OR222902 | MSP0820 | OR222162 | MSP1202 | OR221810 | MSP1609 | OR221471 |
| MSP0071 | OR222044 | MSP0446 | OR222903 | MSP0821 | OR222155 | MSP1204 | OR221812 | MSP1610 | OR221469 |
| MSP0072 | OR222042 | MSP0448 | OR222897 | MSP0823 | OR222153 | MSP1206 | OR221813 | MSP1611 | OR221470 |
| MSP0073 | OR222041 | MSP0449 | OR222898 | MSP0824 | OR222157 | MSP1207 | OR221814 | MSP1612 | OR221472 |
| MSP0074 | OR222040 | MSP0450 | OR222901 | MSP0825 | OR222156 | MSP1208 | OR221815 | MSP1613 | OR221473 |
| MSP0075 | OR222038 | MSP0451 | OR222893 | MSP0827 | OR222150 | MSP1209 | OR221805 | MSP1614 | OR221462 |
| MSP0076 | OR222039 | MSP0452 | OR222894 | MSP0828 | OR222151 | MSP1211 | OR221808 | MSP1615 | OR221465 |
| MSP0077 | OR222036 | MSP0453 | OR222895 | MSP0829 | OR222154 | MSP1213 | OR221807 | MSP1616 | OR221463 |
| MSP0078 | OR222037 | MSP0454 | OR222896 | MSP0831 | OR222152 | MSP1214 | OR221811 | MSP1617 | OR221464 |
| MSP0079 | OR222034 | MSP0455 | OR222889 | MSP0832 | OR222145 | MSP1215 | OR221809 | MSP1618 | OR221466 |
| MSP0081 | OR222033 | MSP0456 | OR222891 | MSP0833 | OR222146 | MSP1216 | OR221802 | MSP1619 | OR221467 |
| MSP0082 | OR222032 | MSP0457 | OR222892 | MSP0834 | OR222147 | MSP1217 | OR221803 | MSP1620 | OR221455 |
| MSP0083 | OR222031 | MSP0458 | OR222887 | MSP0835 | OR222148 | MSP1219 | OR221804 | MSP1621 | OR221458 |
| MSP0084 | OR222035 | MSP0459 | OR222890 | MSP0836 | OR222149 | MSP1220 | OR221806 | MSP1622 | OR221457 |
| MSP0085 | OR222029 | MSP0460 | OR222888 | MSP0837 | OR222141 | MSP1221 | OR221797 | MSP1623 | OR221459 |
| MSP0086 | OR222030 | MSP0461 | OR222884 | MSP0838 | OR222143 | MSP1222 | OR221798 | MSP1624 | OR221460 |
| MSP0088 | OR222027 | MSP0463 | OR222885 | MSP0839 | OR222142 | MSP1223 | OR221799 | MSP1625 | OR221461 |
| MSP0089 | OR222028 | MSP0465 | OR222886 | MSP0840 | OR222144 | MSP1225 | OR221801 | MSP1626 | OR221451 |
| MSP0090 | OR222025 | MSP0466 | OR222879 | MSP0841 | OR222137 | MSP1226 | OR221800 | MSP1627 | OR221453 |
| MSP0091 | OR222026 | MSP0467 | OR222881 | MSP0842 | OR222138 | MSP1227 | OR221793 | MSP1629 | OR221454 |
| MSP0094 | OR222023 | MSP0468 | OR222883 | MSP0843 | OR222140 | MSP1228 | OR221794 | MSP1630 | OR221456 |
| MSP0095 | OR222024 | MSP0469 | OR222882 | MSP0844 | OR222139 | MSP1229 | OR221796 | MSP1631 | OR221446 |
| MSP0097 | OR222022 | MSP0470 | OR222878 | MSP0845 | OR222133 | MSP1230 | OR221795 | MSP1632 | OR221447 |
| MSP0101 | OR222021 | MSP0471 | OR222877 | MSP0846 | OR222134 | MSP1232 | OR221787 | MSP1633 | OR221448 |
| MSP0102 | OR222020 | MSP0472 | OR222880 | MSP0847 | OR222135 | MSP1233 | OR221788 | MSP1634 | OR221449 |
| MSP0103 | OR222019 | MSP0473 | OR222874 | MSP0848 | OR222136 | MSP1234 | OR221790 | MSP1635 | OR221450 |
| MSP0104 | OR222018 | MSP0474 | OR222875 | MSP0850 | OR222128 | MSP1235 | OR221789 | MSP1636 | OR221452 |
| MSP0105 | OR222015 | MSP0475 | OR222876 | MSP0851 | OR222129 | MSP1236 | OR221791 | MSP1637 | OR221441 |
| MSP0106 | OR222017 | MSP0476 | OR222873 | MSP0852 | OR222130 | MSP1237 | OR221792 | MSP1638 | OR221442 |
| MSP0107 | OR222014 | MSP0477 | OR222871 | MSP0853 | OR222132 | MSP1238 | OR221783 | MSP1639 | OR221444 |
| MSP0108 | OR222016 | MSP0478 | OR222872 | MSP0854 | OR222131 | MSP1240 | OR221786 | MSP1642 | OR221443 |
| MSP0109 | OR222012 | MSP0479 | OR222869 | MSP0855 | OR222125 | MSP1241 | OR221784 | MSP1644 | OR221445 |
| MSP0110 | OR222013 | MSP0481 | OR222867 | MSP0856 | OR222126 | MSP1242 | OR221785 | MSP1645 | OR221436 |

|         |          |         |          |         |          |         |          |         |          |
|---------|----------|---------|----------|---------|----------|---------|----------|---------|----------|
| MSP0111 | OR222011 | MSP0483 | OR222868 | MSP0858 | OR222127 | MSP1243 | OR221780 | MSP1646 | OR221439 |
| MSP0112 | OR222010 | MSP0484 | OR222870 | MSP0859 | OR222121 | MSP1244 | OR221779 | MSP1647 | OR221437 |
| MSP0113 | OR222009 | MSP0485 | OR222864 | MSP0860 | OR222122 | MSP1245 | OR221782 | MSP1649 | OR221438 |
| MSP0114 | OR222008 | MSP0486 | OR222865 | MSP0861 | OR222124 | MSP1246 | OR221781 | MSP1650 | OR221440 |
| MSP0115 | OR222006 | MSP0487 | OR222866 | MSP0862 | OR222123 | MSP1247 | OR221777 | MSP1651 | OR221431 |
| MSP0116 | OR222007 | MSP0488 | OR222860 | MSP0863 | OR222118 | MSP1248 | OR221775 | MSP1652 | OR221430 |
| MSP0119 | OR222004 | MSP0489 | OR222861 | MSP0865 | OR222119 | MSP1249 | OR221774 | MSP1653 | OR221432 |
| MSP0120 | OR222005 | MSP0491 | OR222862 | MSP0866 | OR222116 | MSP1250 | OR221776 | MSP1654 | OR221433 |
| MSP0121 | OR222002 | MSP0492 | OR222863 | MSP0867 | OR222120 | MSP1251 | OR221778 | MSP1657 | OR221434 |
| MSP0122 | OR222003 | MSP0493 | OR222857 | MSP0868 | OR222113 | MSP1252 | OR221769 | MSP1659 | OR221435 |
| MSP0123 | OR221999 | MSP0494 | OR222858 | MSP0869 | OR222112 | MSP1253 | OR221771 | MSP1660 | OR221425 |
| MSP0124 | OR222000 | MSP0495 | OR222859 | MSP0870 | OR222114 | MSP1254 | OR221772 | MSP1661 | OR221426 |
| MSP0125 | OR221998 | MSP0496 | OR222854 | MSP0871 | OR222115 | MSP1255 | OR221770 | MSP1662 | OR221427 |
| MSP0127 | OR222001 | MSP0497 | OR222855 | MSP0872 | OR222117 | MSP1256 | OR221773 | MSP1664 | OR221428 |
| MSP0128 | OR221997 | MSP0498 | OR222856 | MSP0873 | OR222110 | MSP1257 | OR221763 | MSP1666 | OR221429 |
| MSP0129 | OR221996 | MSP0499 | OR222851 | MSP0874 | OR222111 | MSP1259 | OR221766 | MSP1667 | OR221421 |
| MSP0130 | OR221995 | MSP0500 | OR222852 | MSP0875 | OR222509 | MSP1260 | OR221767 | MSP1668 | OR221423 |
| MSP0131 | OR221993 | MSP0501 | OR222853 | MSP0876 | OR222505 | MSP1261 | OR221765 | MSP1669 | OR221420 |
| MSP0132 | OR221994 | MSP0502 | OR222847 | MSP0877 | OR222504 | MSP1262 | OR221768 | MSP1670 | OR221422 |
| MSP0133 | OR221991 | MSP0503 | OR222849 | MSP0878 | OR222508 | MSP1263 | OR221759 | MSP1671 | OR221424 |
| MSP0134 | OR221992 | MSP0504 | OR222850 | MSP0880 | OR222507 | MSP1264 | OR221762 | MSP1672 | OR221417 |
| MSP0135 | OR221989 | MSP0505 | OR222844 | MSP0881 | OR222506 | MSP1266 | OR221760 | MSP1673 | OR221415 |
| MSP0136 | OR221990 | MSP0506 | OR222845 | MSP0882 | OR222500 | MSP1268 | OR221761 | MSP1674 | OR221416 |
| MSP0137 | OR221987 | MSP0507 | OR222846 | MSP0883 | OR222502 | MSP1270 | OR221764 | MSP1676 | OR221418 |
| MSP0139 | OR221988 | MSP0509 | OR222848 | MSP0884 | OR222501 | MSP1272 | OR221754 | MSP1677 | OR221419 |
| MSP0140 | OR221986 | MSP0510 | OR222841 | MSP0885 | OR222503 | MSP1273 | OR221756 | MSP1678 | OR221409 |
| MSP0141 | OR221985 | MSP0511 | OR222843 | MSP0886 | OR222497 | MSP1275 | OR221755 | MSP1680 | OR221411 |
| MSP0142 | OR221983 | MSP0512 | OR222842 | MSP0887 | OR222496 | MSP1276 | OR221757 | MSP1681 | OR221410 |
| MSP0143 | OR221984 | MSP0514 | OR222838 | MSP0888 | OR222498 | MSP1277 | OR221758 | MSP1682 | OR221412 |
| MSP0144 | OR221982 | MSP0515 | OR222839 | MSP0889 | OR222499 | MSP1278 | OR221748 | MSP1683 | OR221413 |
| MSP0145 | OR221979 | MSP0516 | OR222840 | MSP0890 | OR222491 | MSP1279 | OR221750 | MSP1684 | OR221414 |
| MSP0146 | OR221980 | MSP0517 | OR222836 | MSP0891 | OR222493 | MSP1280 | OR221751 | MSP1685 | OR221405 |
| MSP0147 | OR221981 | MSP0518 | OR222837 | MSP0892 | OR222494 | MSP1281 | OR221752 | MSP1686 | OR221404 |

|         |          |         |          |         |          |         |          |         |          |
|---------|----------|---------|----------|---------|----------|---------|----------|---------|----------|
| MSP0148 | OR221976 | MSP0519 | OR222835 | MSP0893 | OR222495 | MSP1283 | OR221753 | MSP1687 | OR221406 |
| MSP0149 | OR221978 | MSP0520 | OR222834 | MSP0894 | OR222487 | MSP1285 | OR221745 | MSP1689 | OR221407 |
| MSP0150 | OR221975 | MSP0521 | OR222831 | MSP0896 | OR222489 | MSP1286 | OR221744 | MSP1691 | OR221408 |
| MSP0151 | OR221977 | MSP0522 | OR222832 | MSP0898 | OR222490 | MSP1288 | OR221746 | MSP1692 | OR221398 |
| MSP0152 | OR221973 | MSP0523 | OR222833 | MSP0899 | OR222492 | MSP1289 | OR221747 | MSP1693 | OR221399 |
| MSP0153 | OR221974 | MSP0524 | OR222827 | MSP0900 | OR222484 | MSP1290 | OR221749 | MSP1694 | OR221401 |
| MSP0154 | OR221971 | MSP0526 | OR222828 | MSP0901 | OR222486 | MSP1292 | OR221737 | MSP1695 | OR221400 |
| MSP0155 | OR221972 | MSP0527 | OR222830 | MSP0902 | OR222488 | MSP1293 | OR221739 | MSP1696 | OR221402 |
| MSP0156 | OR221968 | MSP0528 | OR222829 | MSP0903 | OR222485 | MSP1294 | OR221741 | MSP1697 | OR221403 |
| MSP0157 | OR221969 | MSP0529 | OR222822 | MSP0904 | OR222480 | MSP1295 | OR221742 | MSP1698 | OR221393 |
| MSP0158 | OR221966 | MSP0530 | OR222825 | MSP0906 | OR222482 | MSP1296 | OR221743 | MSP1699 | OR221394 |
| MSP0159 | OR221967 | MSP0531 | OR222826 | MSP0907 | OR222481 | MSP1297 | OR221733 | MSP1700 | OR221395 |
| MSP0160 | OR221970 | MSP0533 | OR222824 | MSP0908 | OR222483 | MSP1298 | OR221734 | MSP1701 | OR221397 |
| MSP0161 | OR221963 | MSP0534 | OR222819 | MSP0909 | OR222475 | MSP1299 | OR221735 | MSP1702 | OR221396 |
| MSP0162 | OR221965 | MSP0535 | OR222820 | MSP0910 | OR222478 | MSP1300 | OR221740 | MSP1703 | OR221386 |
| MSP0163 | OR221962 | MSP0536 | OR222821 | MSP0911 | OR222477 | MSP1301 | OR221738 | MSP1704 | OR221388 |
| MSP0164 | OR221964 | MSP0537 | OR222823 | MSP0912 | OR222479 | MSP1302 | OR221729 | MSP1705 | OR221389 |
| MSP0165 | OR221958 | MSP0538 | OR222818 | MSP0913 | OR222472 | MSP1303 | OR221730 | MSP1706 | OR221390 |
| MSP0166 | OR221961 | MSP0539 | OR222815 | MSP0914 | OR222474 | MSP1304 | OR221731 | MSP1708 | OR221392 |
| MSP0167 | OR221959 | MSP0540 | OR222816 | MSP0915 | OR222476 | MSP1305 | OR221732 | MSP1709 | OR221391 |
| MSP0168 | OR221960 | MSP0541 | OR222811 | MSP0916 | OR222467 | MSP1306 | OR221736 | MSP1710 | OR221381 |
| MSP0169 | OR221957 | MSP0542 | OR222814 | MSP0917 | OR222469 | MSP1307 | OR221723 | MSP1711 | OR221383 |
| MSP0170 | OR221956 | MSP0543 | OR222817 | MSP0918 | OR222471 | MSP1308 | OR221725 | MSP1712 | OR221384 |
| MSP0171 | OR221954 | MSP0544 | OR222812 | MSP0919 | OR222470 | MSP1309 | OR221726 | MSP1713 | OR221385 |
| MSP0172 | OR221953 | MSP0545 | OR222809 | MSP0920 | OR222473 | MSP1310 | OR221727 | MSP1714 | OR221387 |
| MSP0173 | OR221952 | MSP0546 | OR222813 | MSP0921 | OR222464 | MSP1312 | OR221728 | MSP1715 | OR221377 |
| MSP0174 | OR221955 | MSP0547 | OR222810 | MSP0922 | OR222466 | MSP1313 | OR221719 | MSP1716 | OR221378 |
| MSP0176 | OR221948 | MSP0548 | OR222806 | MSP0923 | OR222465 | MSP1314 | OR221720 | MSP1717 | OR221379 |
| MSP0177 | OR221951 | MSP0549 | OR222808 | MSP0924 | OR222468 | MSP1315 | OR221721 | MSP1718 | OR221380 |
| MSP0178 | OR221950 | MSP0550 | OR222807 | MSP0925 | OR222459 | MSP1316 | OR221722 | MSP1719 | OR221382 |
| MSP0179 | OR221949 | MSP0552 | OR222802 | MSP0926 | OR222461 | MSP1318 | OR221724 | MSP1720 | OR221371 |
| MSP0180 | OR221946 | MSP0553 | OR222803 | MSP0927 | OR222462 | MSP1319 | OR221713 | MSP1721 | OR221373 |
| MSP0181 | OR221947 | MSP0554 | OR222805 | MSP0928 | OR222463 | MSP1320 | OR221716 | MSP1722 | OR221372 |

|         |          |         |          |         |          |         |          |         |          |
|---------|----------|---------|----------|---------|----------|---------|----------|---------|----------|
| MSP0182 | OR221943 | MSP0555 | OR222804 | MSP0929 | OR222456 | MSP1322 | OR221714 | MSP1723 | OR221376 |
| MSP0183 | OR221945 | MSP0556 | OR222799 | MSP0930 | OR222457 | MSP1323 | OR221717 | MSP1724 | OR221374 |
| MSP0184 | OR221942 | MSP0557 | OR222800 | MSP0931 | OR222458 | MSP1324 | OR221718 | MSP1725 | OR221375 |
| MSP0185 | OR221944 | MSP0558 | OR222801 | MSP0934 | OR222460 | MSP1326 | OR221708 | MSP1726 | OR221367 |
| MSP0186 | OR221941 | MSP0559 | OR222795 | MSP0935 | OR222451 | MSP1327 | OR221710 | MSP1727 | OR221368 |
| MSP0187 | OR221940 | MSP0560 | OR222796 | MSP0936 | OR222453 | MSP1328 | OR221709 | MSP1728 | OR221366 |
| MSP0188 | OR221938 | MSP0561 | OR222797 | MSP0938 | OR222454 | MSP1329 | OR221711 | MSP1729 | OR221370 |
| MSP0189 | OR221937 | MSP0562 | OR222798 | MSP0939 | OR222455 | MSP1330 | OR221712 | MSP1730 | OR221369 |
| MSP0190 | OR221939 | MSP0563 | OR222792 | MSP0940 | OR222448 | MSP1331 | OR221715 | MSP1731 | OR221360 |
| MSP0192 | OR221934 | MSP0564 | OR222793 | MSP0941 | OR222450 | MSP1332 | OR221703 | MSP1732 | OR221362 |
| MSP0193 | OR221936 | MSP0565 | OR222794 | MSP0942 | OR222449 | MSP1333 | OR221704 | MSP1733 | OR221361 |
| MSP0195 | OR221933 | MSP0566 | OR222789 | MSP0944 | OR222452 | MSP1334 | OR221705 | MSP1734 | OR221363 |
| MSP0196 | OR221935 | MSP0567 | OR222790 | MSP0945 | OR222443 | MSP1335 | OR221706 | MSP1735 | OR221364 |
| MSP0197 | OR221931 | MSP0568 | OR222791 | MSP0946 | OR222445 | MSP1337 | OR221707 | MSP1736 | OR221365 |
| MSP0198 | OR221932 | MSP0569 | OR222785 | MSP0947 | OR222444 | MSP1338 | OR221698 | MSP1737 | OR221354 |
| MSP0199 | OR221928 | MSP0570 | OR222786 | MSP0948 | OR222447 | MSP1339 | OR221699 | MSP1738 | OR221355 |
| MSP0200 | OR221929 | MSP0571 | OR222787 | MSP0949 | OR222446 | MSP1340 | OR221700 | MSP1740 | OR221356 |
| MSP0201 | OR221930 | MSP0572 | OR222788 | MSP0950 | OR222441 | MSP1341 | OR221701 | MSP1742 | OR221358 |
| MSP0202 | OR221927 | MSP0573 | OR222782 | MSP0951 | OR222439 | MSP1342 | OR221702 | MSP1743 | OR221357 |
| MSP0203 | OR221926 | MSP0574 | OR222783 | MSP0952 | OR222442 | MSP1344 | OR221695 | MSP1744 | OR221359 |
| MSP0204 | OR221923 | MSP0575 | OR222784 | MSP0953 | OR222440 | MSP1345 | OR221693 | MSP1746 | OR221350 |
| MSP0205 | OR221925 | MSP0576 | OR222778 | MSP0954 | OR222437 | MSP1346 | OR221694 | MSP1747 | OR221349 |
| MSP0206 | OR221921 | MSP0577 | OR222779 | MSP0955 | OR222435 | MSP1347 | OR221696 | MSP1748 | OR221351 |
| MSP0207 | OR221922 | MSP0578 | OR222780 | MSP0956 | OR222436 | MSP1348 | OR221697 | MSP1749 | OR221353 |
| MSP0208 | OR221924 | MSP0579 | OR222781 | MSP0957 | OR222438 | MSP1349 | OR221688 | MSP1750 | OR221352 |
| MSP0209 | OR221919 | MSP0580 | OR222775 | MSP0958 | OR222430 | MSP1350 | OR221689 | MSP1753 | OR221344 |
| MSP0210 | OR221920 | MSP0581 | OR222776 | MSP0959 | OR222432 | MSP1351 | OR221690 | MSP1754 | OR221345 |
| MSP0211 | OR221916 | MSP0582 | OR222777 | MSP0960 | OR222431 | MSP1352 | OR221691 | MSP1755 | OR221347 |
| MSP0212 | OR221918 | MSP0583 | OR222773 | MSP0961 | OR222433 | MSP1353 | OR221692 | MSP1756 | OR221346 |
| MSP0213 | OR221915 | MSP0584 | OR222772 | MSP0962 | OR222434 | MSP1354 | OR221684 | MSP1757 | OR221348 |
| MSP0214 | OR221917 | MSP0586 | OR222774 | MSP0963 | OR222425 | MSP1355 | OR221683 | MSP1760 | OR221337 |
| MSP0215 | OR221911 | MSP0587 | OR222768 | MSP0965 | OR222426 | MSP1358 | OR221686 | MSP1761 | OR221339 |
| MSP0216 | OR221910 | MSP0588 | OR222769 | MSP0967 | OR222428 | MSP1359 | OR221687 | MSP1762 | OR221340 |



|         |          |         |          |         |          |         |          |         |          |
|---------|----------|---------|----------|---------|----------|---------|----------|---------|----------|
| MSP0217 | OR221913 | MSP0589 | OR222770 | MSP0968 | OR222427 | MSP1360 | OR221679 | MSP1763 | OR221342 |
| MSP0218 | OR221912 | MSP0590 | OR222771 | MSP0969 | OR222429 | MSP1361 | OR221681 | MSP1766 | OR221341 |
| MSP0219 | OR221914 | MSP0591 | OR222764 | MSP0970 | OR222421 | MSP1362 | OR221680 | MSP1767 | OR221343 |
| MSP0220 | OR222709 | MSP0592 | OR222765 | MSP0971 | OR222422 | MSP1363 | OR221682 | MSP1768 | OR221333 |
| MSP0221 | OR222708 | MSP0593 | OR222766 | MSP0972 | OR222423 | MSP1364 | OR221685 | MSP1769 | OR221332 |
| MSP0222 | OR222706 | MSP0594 | OR222767 | MSP0973 | OR222424 | MSP1365 | OR221677 | MSP1770 | OR221335 |
| MSP0223 | OR222707 | MSP0595 | OR222761 | MSP0974 | OR222417 | MSP1366 | OR221674 | MSP1771 | OR221334 |
| MSP0224 | OR222705 | MSP0596 | OR222762 | MSP0975 | OR222418 | MSP1367 | OR221675 | MSP1772 | OR221336 |
| MSP0225 | OR222703 | MSP0598 | OR222763 | MSP0976 | OR222419 | MSP1368 | OR221676 | MSP1773 | OR221338 |
| MSP0226 | OR222704 | MSP0599 | OR222756 | MSP0977 | OR222420 | MSP1370 | OR221678 | MSP1774 | OR221326 |
| MSP0227 | OR222701 | MSP0600 | OR222759 | MSP0978 | OR222413 | MSP1371 | OR221667 | MSP1776 | OR221327 |
| MSP0228 | OR222702 | MSP0601 | OR222758 | MSP0980 | OR222412 | MSP1372 | OR221671 | MSP1777 | OR221328 |
| MSP0229 | OR222699 | MSP0602 | OR222760 | MSP0981 | OR222414 | MSP1373 | OR221669 | MSP1778 | OR221329 |
| MSP0230 | OR222700 | MSP0603 | OR222754 | MSP0982 | OR222415 | MSP1374 | OR221670 | MSP1779 | OR221330 |
| MSP0232 | OR222697 | MSP0604 | OR222753 | MSP0983 | OR222416 | MSP1375 | OR221672 | MSP1780 | OR221331 |
| MSP0233 | OR222698 | MSP0605 | OR222755 | MSP0985 | OR222408 | MSP1376 | OR221673 | MSP1781 | OR221323 |
| MSP0234 | OR222694 | MSP0606 | OR222757 | MSP0986 | OR222409 | MSP1377 | OR221662 | MSP1782 | OR221322 |
| MSP0235 | OR222695 | MSP0608 | OR222748 | MSP0987 | OR222410 | MSP1378 | OR221664 | MSP1783 | OR221321 |
| MSP0236 | OR222696 | MSP0609 | OR222750 | MSP0988 | OR222411 | MSP1379 | OR221666 | MSP1784 | OR221324 |
| MSP0237 | OR222692 | MSP0610 | OR222751 | MSP0989 | OR222403 | MSP1380 | OR221665 | MSP1785 | OR221325 |
| MSP0238 | OR222693 | MSP0611 | OR222752 | MSP0990 | OR222405 | MSP1382 | OR221668 | MSP1786 | OR221316 |
| MSP0239 | OR222689 | MSP0612 | OR222745 | MSP0991 | OR222406 | MSP1383 | OR221658 | MSP1787 | OR221317 |
| MSP0240 | OR222691 | MSP0613 | OR222746 | MSP0992 | OR222407 | MSP1384 | OR221660 | MSP1788 | OR221318 |
| MSP0241 | OR222688 | MSP0614 | OR222749 | MSP0993 | OR222401 | MSP1387 | OR221659 | MSP1789 | OR221319 |
| MSP0242 | OR222687 | MSP0615 | OR222747 | MSP0994 | OR222400 | MSP1388 | OR221661 | MSP1790 | OR221320 |
| MSP0243 | OR222690 | MSP0616 | OR222744 | MSP0995 | OR222404 | MSP1389 | OR221663 | MSP1791 | OR221311 |
| MSP0244 | OR222684 | MSP0617 | OR222743 | MSP0997 | OR222402 | MSP1390 | OR221653 | MSP1792 | OR221312 |
| MSP0245 | OR222686 | MSP0618 | OR222742 | MSP0998 | OR222396 | MSP1391 | OR221654 | MSP1793 | OR221313 |
| MSP0246 | OR222685 | MSP0619 | OR222736 | MSP0999 | OR222398 | MSP1392 | OR221655 | MSP1795 | OR221314 |
| MSP0247 | OR222682 | MSP0621 | OR222738 | MSP1000 | OR222397 | MSP1393 | OR221656 | MSP1796 | OR221315 |
| MSP0248 | OR222683 | MSP0623 | OR222741 | MSP1001 | OR222399 | MSP1394 | OR221657 | MSP1797 | OR221304 |
| MSP0249 | OR222679 | MSP0624 | OR222740 | MSP1003 | OR222390 | MSP1395 | OR221645 | MSP1798 | OR221306 |
| MSP0250 | OR222681 | MSP0625 | OR222735 | MSP1004 | OR222392 | MSP1397 | OR221648 | MSP1799 | OR221308 |

|         |          |         |          |         |          |         |          |         |          |
|---------|----------|---------|----------|---------|----------|---------|----------|---------|----------|
| MSP0252 | OR222680 | MSP0626 | OR222737 | MSP1006 | OR222393 | MSP1399 | OR221649 | MSP1800 | OR221307 |
| MSP0253 | OR222676 | MSP0627 | OR222739 | MSP1007 | OR222394 | MSP1400 | OR221650 | MSP1801 | OR221310 |
| MSP0254 | OR222677 | MSP0628 | OR222732 | MSP1008 | OR222395 | MSP1401 | OR221652 | MSP1802 | OR221309 |
| MSP0255 | OR222678 | MSP0629 | OR222730 | MSP1009 | OR222388 | MSP1402 | OR221651 | MSP1803 | OR221299 |
| MSP0256 | OR222674 | MSP0630 | OR222733 | MSP1010 | OR222387 | MSP1403 | OR221643 | MSP1804 | OR221300 |
| MSP0257 | OR222675 | MSP0632 | OR222727 | MSP1011 | OR222389 | MSP1404 | OR221642 | MSP1805 | OR221301 |
| MSP0258 | OR222671 | MSP0633 | OR222729 | MSP1012 | OR222391 | MSP1405 | OR221644 | MSP1806 | OR221302 |
| MSP0259 | OR222672 | MSP0634 | OR222734 | MSP1013 | OR222382 | MSP1406 | OR221646 | MSP1807 | OR221303 |
| MSP0260 | OR222673 | MSP0635 | OR222731 | MSP1014 | OR222384 | MSP1408 | OR221647 | MSP1808 | OR221305 |
| MSP0261 | OR222669 | MSP0636 | OR222724 | MSP1015 | OR222386 | MSP1409 | OR221637 | MSP1809 | OR221294 |
| MSP0262 | OR222670 | MSP0637 | OR222728 | MSP1016 | OR222385 | MSP1411 | OR221638 | MSP1810 | OR221295 |
| MSP0263 | OR222665 | MSP0638 | OR222726 | MSP1017 | OR222377 | MSP1412 | OR221639 | MSP1811 | OR221296 |
| MSP0264 | OR222668 | MSP0639 | OR222725 | MSP1018 | OR222380 | MSP1413 | OR221640 | MSP1812 | OR221298 |
| MSP0265 | OR222666 | MSP0640 | OR222720 | MSP1019 | OR222381 | MSP1414 | OR221641 | MSP1814 | OR221297 |
| MSP0266 | OR222667 | MSP0642 | OR222721 | MSP1020 | OR222383 | MSP1415 | OR221635 | MSP1815 | OR221290 |
| MSP0267 | OR222661 | MSP0643 | OR222723 | MSP1021 | OR222375 | MSP1416 | OR221633 | MSP1816 | OR221289 |
| MSP0268 | OR222663 | MSP0644 | OR222722 | MSP1022 | OR222376 | MSP1417 | OR221634 | MSP1819 | OR221291 |
| MSP0269 | OR222664 | MSP0645 | OR222716 | MSP1023 | OR222379 | MSP1418 | OR221636 | MSP1820 | OR221292 |
| MSP0270 | OR222660 | MSP0646 | OR222717 | MSP1024 | OR222378 | MSP1419 | OR221627 | MSP1821 | OR221293 |
| MSP0271 | OR222662 | MSP0647 | OR222718 | MSP1025 | OR222371 | MSP1420 | OR221629 | MSP1822 | OR221283 |
| MSP0272 | OR222657 | MSP0648 | OR222719 | MSP1026 | OR222373 | MSP1421 | OR221628 | MSP1823 | OR221284 |
| MSP0273 | OR222658 | MSP0650 | OR222713 | MSP1027 | OR222374 | MSP1423 | OR221630 | MSP1824 | OR221285 |
| MSP0274 | OR222659 | MSP0651 | OR222712 | MSP1028 | OR222372 | MSP1424 | OR221632 | MSP1825 | OR221286 |
| MSP0275 | OR222655 | MSP0652 | OR222714 | MSP1029 | OR222367 | MSP1425 | OR221631 | MSP1826 | OR221287 |
| MSP0276 | OR222656 | MSP0653 | OR222715 | MSP1031 | OR222366 | MSP1427 | OR221621 | MSP1827 | OR221288 |
| MSP0277 | OR222652 | MSP0654 | OR222710 | MSP1032 | OR222368 | MSP1428 | OR221623 | MSP1828 | OR221276 |
| MSP0278 | OR222653 | MSP0655 | OR222711 | MSP1033 | OR222369 | MSP1429 | OR221624 | MSP1829 | OR221279 |
| MSP0279 | OR222654 | MSP0656 | OR222309 | MSP1034 | OR222370 | MSP1432 | OR221625 | MSP1830 | OR221281 |
| MSP0280 | OR222648 | MSP0657 | OR222306 | MSP1035 | OR222361 | MSP1433 | OR221626 | MSP1831 | OR221280 |
| MSP0281 | OR222649 | MSP0658 | OR222307 | MSP1036 | OR222363 | MSP1434 | OR221615 | MSP1832 | OR221282 |
| MSP0282 | OR222651 | MSP0659 | OR222308 | MSP1037 | OR222364 | MSP1435 | OR221617 | MSP1833 | OR221271 |
| MSP0283 | OR222647 | MSP0660 | OR222302 | MSP1038 | OR222365 | MSP1436 | OR221619 | MSP1834 | OR221272 |
| MSP0284 | OR222650 | MSP0661 | OR222303 | MSP1039 | OR222357 | MSP1438 | OR221618 | MSP1835 | OR221273 |

|         |          |         |          |         |          |         |          |         |          |
|---------|----------|---------|----------|---------|----------|---------|----------|---------|----------|
| MSP0285 | OR222644 | MSP0662 | OR222304 | MSP1041 | OR222359 | MSP1439 | OR221620 | MSP1836 | OR221274 |
| MSP0286 | OR222645 | MSP0663 | OR222305 | MSP1042 | OR222360 | MSP1440 | OR221622 | MSP1838 | OR221275 |
| MSP0287 | OR222646 | MSP0664 | OR222298 | MSP1043 | OR222362 | MSP1441 | OR221610 | MSP1839 | OR221277 |
| MSP0288 | OR222642 | MSP0665 | OR222299 | MSP1044 | OR222353 | MSP1442 | OR221612 | MSP1840 | OR221278 |
| MSP0289 | OR222643 | MSP0666 | OR222301 | MSP1045 | OR222354 | MSP1443 | OR221614 | MSP1841 | OR221266 |
| MSP0290 | OR222639 | MSP0667 | OR222300 | MSP1046 | OR222355 | MSP1444 | OR221613 | MSP1842 | OR221268 |
| MSP0291 | OR222640 | MSP0668 | OR222294 | MSP1047 | OR222358 | MSP1445 | OR221616 | MSP1843 | OR221267 |
| MSP0292 | OR222641 | MSP0669 | OR222295 | MSP1048 | OR222356 | MSP1448 | OR221605 | MSP1844 | OR221269 |
| MSP0293 | OR222636 | MSP0670 | OR222297 | MSP1049 | OR222349 | MSP1449 | OR221607 | MSP1845 | OR221270 |
| MSP0294 | OR222637 | MSP0672 | OR222296 | MSP1050 | OR222348 | MSP1450 | OR221608 | MSP1846 | OR221261 |
| MSP0295 | OR222638 | MSP0673 | OR222290 | MSP1051 | OR222350 | MSP1451 | OR221609 | MSP1847 | OR221260 |
| MSP0296 | OR222634 | MSP0674 | OR222292 | MSP1052 | OR222352 | MSP1453 | OR221611 | MSP1848 | OR221263 |
| MSP0297 | OR222635 | MSP0675 | OR222291 | MSP1054 | OR222351 | MSP1454 | OR221600 | MSP1849 | OR221262 |
| MSP0298 | OR222630 | MSP0676 | OR222293 | MSP1055 | OR222343 | MSP1456 | OR221602 | MSP1850 | OR221264 |
| MSP0299 | OR222632 | MSP0677 | OR222286 | MSP1056 | OR222345 | MSP1457 | OR221603 | MSP1851 | OR221265 |
| MSP0300 | OR222633 | MSP0678 | OR222287 | MSP1057 | OR222346 | MSP1458 | OR221604 | MSP1854 | OR221256 |
| MSP0301 | OR222628 | MSP0680 | OR222288 | MSP1058 | OR222347 | MSP1459 | OR221606 | MSP1855 | OR221258 |
| MSP0302 | OR222629 | MSP0681 | OR222289 | MSP1059 | OR222338 | MSP1460 | OR221595 | MSP1857 | OR221257 |
| MSP0303 | OR222631 | MSP0682 | OR222282 | MSP1060 | OR222340 | MSP1461 | OR221597 | MSP1858 | OR221259 |
| MSP0304 | OR222627 | MSP0683 | OR222283 | MSP1061 | OR222341 | MSP1462 | OR221598 | MSP1860 | OR221251 |
| MSP0305 | OR222625 | MSP0684 | OR222285 | MSP1062 | OR222342 | MSP1463 | OR221599 | MSP1861 | OR221250 |
| MSP0306 | OR222623 | MSP0685 | OR222284 | MSP1063 | OR222344 | MSP1466 | OR221601 | MSP1862 | OR221252 |
| MSP0307 | OR222624 | MSP0686 | OR222278 | MSP1064 | OR222335 | MSP1468 | OR221591 | MSP1863 | OR221253 |
| MSP0308 | OR222626 | MSP0687 | OR222279 | MSP1065 | OR222336 | MSP1469 | OR221590 | MSP1864 | OR221254 |
| MSP0309 | OR222620 | MSP0688 | OR222280 | MSP1066 | OR222337 | MSP1470 | OR221592 | MSP1865 | OR221255 |
| MSP0310 | OR222622 | MSP0689 | OR222281 | MSP1067 | OR222339 | MSP1472 | OR221594 | MSP1867 | OR221242 |
| MSP0311 | OR222621 | MSP0690 | OR222275 | MSP1068 | OR222330 | MSP1473 | OR221593 | MSP1868 | OR221246 |
| MSP0312 | OR222616 | MSP0691 | OR222276 | MSP1069 | OR222331 | MSP1474 | OR221596 | MSP1869 | OR221245 |
| MSP0313 | OR222618 | MSP0692 | OR222277 | MSP1070 | OR222333 | MSP1475 | OR221585 | MSP1870 | OR221247 |
| MSP0314 | OR222619 | MSP0693 | OR222271 | MSP1072 | OR222332 | MSP1476 | OR221584 | MSP1871 | OR221249 |
| MSP0315 | OR222617 | MSP0694 | OR222270 | MSP1073 | OR222334 | MSP1477 | OR221586 | MSP1872 | OR221248 |
| MSP0316 | OR222614 | MSP0695 | OR222272 | MSP1074 | OR222325 | MSP1478 | OR221587 | MSP1873 | OR221239 |
| MSP0317 | OR222610 | MSP0696 | OR222273 | MSP1075 | OR222326 | MSP1479 | OR221588 | MSP1875 | OR221237 |

|         |          |         |          |         |          |         |          |         |          |
|---------|----------|---------|----------|---------|----------|---------|----------|---------|----------|
| MSP0318 | OR222613 | MSP0697 | OR222274 | MSP1076 | OR222327 | MSP1480 | OR221589 | MSP1876 | OR221240 |
| MSP0319 | OR222615 | MSP0698 | OR222267 | MSP1077 | OR222328 | MSP1482 | OR221579 | MSP1877 | OR221241 |
| MSP0320 | OR222609 | MSP0699 | OR222268 | MSP1078 | OR222329 | MSP1483 | OR221577 | MSP1878 | OR221244 |
| MSP0321 | OR222611 | MSP0700 | OR222269 | MSP1079 | OR222320 | MSP1484 | OR221581 | MSP1879 | OR221243 |
| MSP0322 | OR222612 | MSP0701 | OR222263 | MSP1080 | OR222321 | MSP1485 | OR221583 | MSP1880 | OR221231 |
| MSP0323 | OR222605 | MSP0702 | OR222264 | MSP1081 | OR222322 | MSP1487 | OR221582 | MSP1881 | OR221233 |
| MSP0325 | OR222607 | MSP0703 | OR222265 | MSP1082 | OR222324 | MSP1488 | OR221575 | MSP1882 | OR221234 |
| MSP0326 | OR222608 | MSP0704 | OR222266 | MSP1083 | OR222323 | MSP1489 | OR221573 | MSP1883 | OR221235 |
| MSP0327 | OR222604 | MSP0705 | OR222259 | MSP1084 | OR222315 | MSP1490 | OR221574 | MSP1884 | OR221236 |
| MSP0328 | OR222606 | MSP0706 | OR222261 | MSP1085 | OR222318 | MSP1491 | OR221576 | MSP1885 | OR221238 |
| MSP0329 | OR222601 | MSP0707 | OR222260 | MSP1086 | OR222316 | MSP1492 | OR221578 | MSP1886 | OR221227 |
| MSP0330 | OR222602 | MSP0708 | OR222262 | MSP1087 | OR222319 | MSP1493 | OR221580 | MSP1887 | OR221229 |
| MSP0331 | OR222603 | MSP0709 | OR222255 | MSP1088 | OR222314 | MSP1494 | OR221567 | MSP1889 | OR221228 |
| MSP0332 | OR222598 | MSP0710 | OR222257 | MSP1089 | OR222311 | MSP1495 | OR221570 | MSP1890 | OR221230 |
| MSP0333 | OR222599 | MSP0711 | OR222256 | MSP1090 | OR222310 | MSP1496 | OR221569 | MSP1891 | OR221232 |
| MSP0334 | OR222600 | MSP0712 | OR222258 | MSP1091 | OR222317 | MSP1497 | OR221571 | MSP1892 | OR221222 |
| MSP0335 | OR222595 | MSP0713 | OR222251 | MSP1093 | OR222313 | MSP1498 | OR221572 | MSP1893 | OR221221 |
| MSP0336 | OR222596 | MSP0714 | OR222252 | MSP1094 | OR222312 | MSP1500 | OR221565 | MSP1894 | OR221223 |
| MSP0337 | OR222597 | MSP0715 | OR222253 | MSP1095 | OR221907 | MSP1501 | OR221563 | MSP1895 | OR221224 |
| MSP0338 | OR222593 | MSP0716 | OR222254 | MSP1096 | OR221909 | MSP1502 | OR221562 | MSP1896 | OR221225 |
| MSP0340 | OR222594 | MSP0717 | OR222248 | MSP1097 | OR221908 | MSP1503 | OR221566 | MSP1897 | OR221226 |
| MSP0341 | OR222590 | MSP0718 | OR222249 | MSP1098 | OR221901 | MSP1504 | OR221568 | MSP1898 | OR221213 |
| MSP0342 | OR222591 | MSP0719 | OR222250 | MSP1099 | OR221903 | MSP1505 | OR221559 | MSP1899 | OR221215 |
| MSP0343 | OR222592 | MSP0720 | OR222245 | MSP1100 | OR221904 | MSP1506 | OR221557 | MSP1900 | OR221216 |
| MSP0344 | OR222587 | MSP0721 | OR222246 | MSP1101 | OR221905 | MSP1507 | OR221558 | MSP1901 | OR221218 |
| MSP0345 | OR222588 | MSP0722 | OR222247 | MSP1102 | OR221906 | MSP1508 | OR221560 | MSP1902 | OR221217 |
| MSP0346 | OR222589 | MSP0723 | OR222241 | MSP1103 | OR221896 | MSP1509 | OR221561 | MSP1903 | OR221219 |
| MSP0347 | OR222584 | MSP0724 | OR222242 | MSP1104 | OR221899 | MSP1510 | OR221564 | MSP1904 | OR221220 |
| MSP0348 | OR222585 | MSP0726 | OR222244 | MSP1105 | OR221898 | MSP1511 | OR221552 | MSP1905 | OR221209 |
| MSP0349 | OR222586 | MSP0727 | OR222243 | MSP1106 | OR221900 | MSP1512 | OR221555 | MSP1907 | OR221210 |
| MSP0350 | OR222581 | MSP0728 | OR222238 | MSP1107 | OR221902 | MSP1513 | OR221554 | MSP1908 | OR221211 |
| MSP0352 | OR222582 | MSP0729 | OR222237 | MSP1108 | OR221894 | MSP1514 | OR221556 | MSP1909 | OR221212 |
| MSP0353 | OR222583 | MSP0730 | OR222239 | MSP1109 | OR221892 | MSP1515 | OR221546 | MSP1910 | OR221214 |

|         |          |         |          |         |          |         |          |         |          |
|---------|----------|---------|----------|---------|----------|---------|----------|---------|----------|
| MSP0354 | OR222578 | MSP0731 | OR222240 | MSP1110 | OR221893 | MSP1516 | OR221548 | MSP1911 | OR221204 |
| MSP0355 | OR222579 | MSP0732 | OR222232 | MSP1111 | OR221895 | MSP1517 | OR221549 | MSP1912 | OR221203 |
| MSP0356 | OR222580 | MSP0734 | OR222234 | MSP1113 | OR221897 | MSP1521 | OR221550 | MSP1913 | OR221206 |
| MSP0357 | OR222575 | MSP0735 | OR222233 | MSP1114 | OR221885 | MSP1522 | OR221551 | MSP1914 | OR221208 |
| MSP0358 | OR222576 | MSP0736 | OR222235 | MSP1115 | OR221887 | MSP1526 | OR221553 | MSP1915 | OR221207 |
| MSP0359 | OR222577 | MSP0737 | OR222236 | MSP1116 | OR221889 | MSP1527 | OR221541 | MSP1916 | OR221198 |
| MSP0360 | OR222571 | MSP0738 | OR222228 | MSP1117 | OR221888 | MSP1530 | OR221543 | MSP1917 | OR221196 |
| MSP0361 | OR222572 | MSP0739 | OR222229 | MSP1118 | OR221890 | MSP1531 | OR221544 | MSP1918 | OR221197 |
| MSP0362 | OR222573 | MSP0740 | OR222230 | MSP1119 | OR221891 | MSP1532 | OR221545 | MSP1919 | OR221201 |
| MSP0363 | OR222574 | MSP0742 | OR222231 | MSP1120 | OR221881 | MSP1533 | OR221547 | MSP1920 | OR221202 |
| MSP0364 | OR222568 | MSP0743 | OR222224 | MSP1121 | OR221880 | MSP1534 | OR221536 | MSP1921 | OR221205 |
| MSP0365 | OR222567 | MSP0744 | OR222225 | MSP1122 | OR221882 | MSP1535 | OR221538 | MSP1922 | OR221200 |
| MSP0366 | OR222570 | MSP0745 | OR222226 | MSP1123 | OR221884 | MSP1537 | OR221539 | MSP1923 | OR221199 |
| MSP0367 | OR222565 | MSP0746 | OR222227 | MSP1124 | OR221886 | MSP1538 | OR221542 |         |          |
